# Supplementary material
Source: PubMed Central journal article supplement (PMC6787295)
Supplement: 41477_2018_172_MOESM1_ESM.pdf [file 41477_2018_172_MOESM1_ESM.pdf]

In the format provided by the authors and unedited.

# Oak genome reveals facets of long lifespan

Christophe Plomion <sup>1,24\*</sup>, Jean-Marc Aury <sup>2,24</sup>, Joëlle Amselem<sup>3,24</sup>, Thibault Leroy<sup>1</sup>, Florent Murat<sup>4</sup>, Sébastien Duplessis <sup>5</sup>, Sébastien Faye<sup>2</sup>, Nicolas Francillonne<sup>3</sup>, Karine Labadie<sup>2</sup>, Grégoire Le Provost<sup>1</sup>, Isabelle Lesur<sup>1,6</sup>, Jérôme Bartholomé <sup>1</sup>, Patricia Faivre-Rampant<sup>7</sup>, Annegret Kohler<sup>5</sup>, Jean-Charles Leplé<sup>8</sup>, Nathalie Chantret<sup>9</sup>, Jun Chen<sup>10</sup>, Anne Diévert<sup>11,12</sup>, Tina Alaeitabar<sup>3</sup>, Valérie Barbe<sup>2</sup>, Caroline Belser <sup>2</sup>, Hélène Bergès<sup>13</sup>, Catherine Bodénès<sup>1</sup>, Marie-Béatrice Bogeat-Triboulot<sup>14</sup>, Marie-Lara Bouffaud<sup>15</sup>, Benjamin Brachi <sup>1</sup>, Emilie Chancerel<sup>1</sup>, David Cohen<sup>14</sup>, Arnaud Couloux<sup>2</sup>, Corinne Da Silva<sup>2</sup>, Carole Dossat<sup>2</sup>, François Ehrenmann<sup>1</sup>, Christine Gaspin<sup>16</sup>, Jacqueline Grima-Pettenati<sup>17</sup>, Erwan Guichoux<sup>1</sup>, Arnaud Hecker<sup>5</sup>, Sylvie Herrmann<sup>18</sup>, Philippe Hugueney<sup>19</sup>, Irène Hummel<sup>14</sup>, Christophe Klopp <sup>16</sup>, Céline Lalanne<sup>1</sup>, Martin Lascoux <sup>10</sup>, Eric Lasserre<sup>20</sup>, Arnaud Lemainque<sup>2</sup>, Marie-Laure Desprez-Loustau<sup>1</sup>, Isabelle Luyten<sup>3</sup>, Mohammed-Amin Madoui<sup>2</sup>, Sophie Mangenot<sup>2</sup>, Clémence Marchal <sup>5</sup>, Florian Maumus<sup>3</sup>, Jonathan Mercier<sup>2</sup>, Célia Michotey<sup>3</sup>, Olivier Panaud<sup>20</sup>, Nathalie Picault<sup>20</sup>, Nicolas Rouhier<sup>5</sup>, Olivier Rué<sup>16</sup>, Camille Rustenholz<sup>19</sup>, Franck Salin<sup>1</sup>, Marçal Soler<sup>17,21</sup>, Mika Tarkka<sup>15</sup>, Amandine Velt<sup>19</sup>, Amy E. Zanne<sup>22</sup>, Francis Martin <sup>5</sup>, Patrick Wincker<sup>23</sup>, Hadi Quesneville<sup>3</sup>, Antoine Kremer<sup>1</sup> and Jérôme Salse<sup>4</sup>

<sup>1</sup>BIOGECO, INRA, Université de Bordeaux, Cestas, France. <sup>2</sup>Commissariat à l'Énergie Atomique (CEA), Genoscope, Institut de Biologie François-Jacob, Evry, France. <sup>3</sup>URGI, INRA, Université Paris-Saclay, Versailles, France. <sup>4</sup>GDEC, INRA-UCA, Clermont-Ferrand, France. <sup>5</sup>IAM, INRA, Université de Lorraine, Champenoux, France. <sup>6</sup>HelixVenture, Mérégnac, France. <sup>7</sup>INRA, US 1279 EPGV, Université Paris-Saclay, Evry, France. <sup>8</sup>BIOFORA, INRA, Orléans, France. <sup>9</sup>AGAP, Université de Montpellier, CIRAD, INRA, Montpellier SupAgro, Montpellier, France. <sup>10</sup>Department of Ecology and Genetics, Evolutionary Biology Centre, Science for Life Laboratory, Uppsala University, Uppsala, Sweden. <sup>11</sup>CIRAD, UMR AGAP, Montpellier, France. <sup>12</sup>Université de Montpellier, CIRAD, INRA, Montpellier SupAgro, Montpellier, France. <sup>13</sup>CNRGV, INRA, Castanet, France. <sup>14</sup>UMR Silva, INRA, Université de Lorraine, AgroPariTech, Nancy, France. <sup>15</sup>Department of Soil Ecology, UFZ-Helmholtz Centre for Environmental Research, Halle/Saale, Germany. <sup>16</sup>Plateforme bioinformatique Toulouse Midi-Pyrénées, INRA, Auzeville Castanet-Tolosan, France. <sup>17</sup>Université de Toulouse, CNRS, UMR 5546, LRSV, Castanet-Tolosan, France. <sup>18</sup>German Centre for Integrative Research (iDiv), Halle-Jena-Leipzig, Leipzig, Germany. <sup>19</sup>SVQV, Université de Strasbourg, INRA, Colmar, France. <sup>20</sup>Université de Perpignan, UMR 5096, Perpignan, France. <sup>21</sup>Laboratori del Suro, University of Girona, Girona, Spain. <sup>22</sup>Department of Biological Sciences, George Washington University, Washington, DC, USA. <sup>23</sup>Génomique Métabolique, Genoscope, Institut de Biologie François-Jacob, Commissariat à l'Énergie Atomique (CEA), CNRS, Université d'Evry, Université Paris-Saclay, Evry, France. <sup>24</sup>These authors contributed equally: Christophe Plomion, Jean-Marc Aury, Joëlle Amselem. \*e-mail: [christophe.plomion@inra.fr](mailto:christophe.plomion@inra.fr)

# SUPPLEMENTARY INFORMATION

## Oak genome reveals facets of long lifespan

Christophe Plomion<sup>1\*</sup> †, Jean-Marc Aury<sup>2</sup> †, Joëlle Amselem<sup>3</sup> †, Thibault Leroy<sup>1</sup> †, Florent Murat<sup>4</sup> †, Sébastien Duplessis<sup>5</sup>, Sébastien Faye<sup>2</sup>, Nicolas Francillonne<sup>3</sup>, Karine Labadie<sup>2</sup>, Grégoire Le Provost<sup>1</sup>, Isabelle Lesur<sup>1,6</sup>, Jérôme Bartholomé<sup>1</sup>, Patricia Faivre-Rampant<sup>7</sup>, Annegret Kohler<sup>5</sup>, Jean-Charles Leplé<sup>8</sup>, Nathalie Chantret<sup>9</sup>, Jun Chen<sup>10</sup>, Anne Diévert<sup>11,12</sup>, Tina Alaeitabar<sup>3</sup>, Valérie Barbe<sup>2</sup>, Caroline Belser<sup>2</sup>, Hélène Bergès<sup>13</sup>, Catherine Bodénès<sup>1</sup>, Marie-Béatrice Bogeat-Triboulot<sup>14</sup>, Marie-Lara Bouffaud<sup>15</sup>, Benjamin Brachi<sup>1</sup>, Emilie Chancerel<sup>1</sup>, David Cohen<sup>14</sup>, Arnaud Couloux<sup>2</sup>, Corinne Da Silva<sup>2</sup>, Carole Dossat<sup>2</sup>, François Ehrenmann<sup>1</sup>, Christine Gaspin<sup>16</sup>, Jacqueline Grima-Pettenati<sup>17</sup>, Erwan Guichoux<sup>1</sup>, Arnaud Hecker<sup>5</sup>, Sylvie Herrmann<sup>18</sup>, Philippe Hugueney<sup>19</sup>, Irène Hummel<sup>14</sup>, Christophe Klopp<sup>16</sup>, Céline Lalanne<sup>1</sup>, Martin Lascoux<sup>10</sup>, Eric Lasserre<sup>20</sup>, Arnaud Lemainque<sup>2</sup>, Marie-Laure Desprez-Loustau<sup>1</sup>, Isabelle Luyten<sup>3</sup>, Mohammed-Amin Madoui<sup>2</sup>, Sophie Mangenot<sup>2</sup>, Clémence Marchal<sup>5</sup>, Florian Maumus<sup>3</sup>, Jonathan Mercier<sup>2</sup>, Célia Michotey<sup>3</sup>, Olivier Panaud<sup>20</sup>, Nathalie Picault<sup>20</sup>, Nicolas Rouhier<sup>5</sup>, Olivier Rué<sup>16</sup>, Camille Rustenholz<sup>19</sup>, Franck Salin<sup>1</sup>, Marçal Soler<sup>17,21</sup>, Mika Tarkka<sup>15</sup>, Amandine Velt<sup>19</sup>, Amy E. Zanne<sup>22</sup>, Francis Martin<sup>5</sup>, Patrick Wincker<sup>23</sup>, Hadi Quesneville<sup>3</sup>, Antoine Kremer<sup>1</sup>, Jérôme Salse<sup>4</sup>

|        |                                                                                            |    |
|--------|--------------------------------------------------------------------------------------------|----|
| 1.     | Information about the genus <i>Quercus</i> .....                                           | 3  |
| 2.     | Reference genome sequencing, assembly and anchoring .....                                  | 5  |
| 2.1.   | BAC sequence analysis .....                                                                | 5  |
| 2.1.1. | Construction and screening of libraries, sequencing and annotation .....                   | 5  |
| 2.1.2. | Results of BAC sequence analysis .....                                                     | 8  |
| 2.1.3. | Comparison of genomic structure between haplotypes.....                                    | 10 |
| 2.2.   | Comparison of the V1 and V2 assemblies and assembly validation.....                        | 11 |
| 2.3.   | Pseudomolecule construction .....                                                          | 12 |
| 3.     | Genome annotation .....                                                                    | 14 |
| 3.1.   | Detection and annotation of transposable elements .....                                    | 14 |
| 3.2.   | Identification and preliminary characterization of endogenous Caulimoviridae .....         | 15 |
| 3.3.   | Gene prediction and functional annotation of protein-encoding genes.....                   | 16 |
| 3.4.   | TEs and genome dynamics .....                                                              | 16 |
| 3.4.1. | Estimation of the age of TE families from consensus sequences.....                         | 16 |
| 3.4.2. | Retrotransposition dynamics .....                                                          | 17 |
| 3.4.3. | Distribution of TEs and genes in the oak genome .....                                      | 18 |
| 3.4.4. | Role of TEs in gene expansion and tandem duplication .....                                 | 19 |
| 3.4.5. | Horizontal transfer of TEs.....                                                            | 19 |
| 3.5.   | Gene prediction, functional annotation of protein-encoding genes and manual curation ..... | 20 |
| 3.5.1. | Aquaporin.....                                                                             | 21 |
| 3.5.2. | MYB.....                                                                                   | 22 |

|    |            |                                                                                                                 |            |
|----|------------|-----------------------------------------------------------------------------------------------------------------|------------|
| 42 | 3.5.3.     | SWEET.....                                                                                                      | 24         |
| 43 | 3.5.4.     | Thioredoxin, glutaredoxin and glutathione transferase.....                                                      | 26         |
| 44 | 3.5.5.     | MLO.....                                                                                                        | 28         |
| 45 | 3.5.6.     | NB-LRR.....                                                                                                     | 30         |
| 46 | 3.5.7.     | RLK.....                                                                                                        | 32         |
| 47 | 3.5.8.     | Biosynthesis of hydrolysable tannins.....                                                                       | 35         |
| 48 | 3.5.9.     | Laccases.....                                                                                                   | 37         |
| 49 | 3.6.       | Non-coding RNA prediction and annotation.....                                                                   | 38         |
| 50 | <b>4.</b>  | <b>Mutational landscape.....</b>                                                                                | <b>42</b>  |
| 51 | 4.1.       | Estimate of genetic diversity and $\pi_0/\pi_4$ ratio.....                                                      | 42         |
| 52 | 4.2.       | Detection of somatic mutations.....                                                                             | 43         |
| 53 | <b>5.</b>  | <b>Comparative and evolutionary genomics.....</b>                                                               | <b>44</b>  |
| 54 | 5.1.       | Macroevolutionary analysis.....                                                                                 | 44         |
| 55 | 5.1.1.     | Oak karyotype evolution and genome organization.....                                                            | 44         |
| 56 | 5.1.2.     | Gene family expansion/contraction in oak.....                                                                   | 44         |
| 57 | 5.2.       | Identification of tandemly duplicated genes in oak.....                                                         | 45         |
| 58 | 5.3.       | Challenges in the identification of genes related to tree habit.....                                            | 45         |
| 59 | 5.4.       | Gene ontology (GO) enrichment analysis.....                                                                     | 47         |
| 60 | 5.4.1.     | GO term enrichment in three categories of genes.....                                                            | 47         |
| 61 | 5.4.2.     | GO term enrichment in orthogroups expanded in pedunculate oak.....                                              | 50         |
| 62 | 5.4.3.     | GO enrichment within the gene families expanded in woody perennial trees<br>relative to herbaceous species..... | 51         |
| 64 | <b>6.</b>  | <b>Web resources.....</b>                                                                                       | <b>53</b>  |
| 65 | <b>7.</b>  | <b>Data availability.....</b>                                                                                   | <b>53</b>  |
| 66 | <b>8.</b>  | <b>References.....</b>                                                                                          | <b>53</b>  |
| 67 | <b>9.</b>  | <b>Supplementary Data Sets.....</b>                                                                             | <b>71</b>  |
| 68 | <b>10.</b> | <b>Supplementary Tables.....</b>                                                                                | <b>74</b>  |
| 69 | <b>11.</b> | <b>Supplementary Figures.....</b>                                                                               | <b>139</b> |

70

71

## 72 **1. Information about the genus *Quercus***

73 Oaks are the dominant tree species in many temperate ecosystems and landscapes. Their  
74 species diversity and geographic distribution underlie this predominance. There are about 350  
75 to 450 oak species worldwide<sup>1</sup>, although species delineation remains a matter of debate due to  
76 considerable phenotypic variation within species and frequent hybridization. However, oak  
77 species diversity is much greater in North and Central America (about 200 species) than in  
78 Asia (about 150 species), and Europe (about 30 species)<sup>2</sup>. On all three continents, a few  
79 species have a continent-wide distribution: *Q. petraea* and *Q. robur* in Europe, *Q.*  
80 *macrocarpa* in North America<sup>3</sup>, and *Q. acutissima* and *Q. mongolica* in Asia<sup>4</sup>. The IUCN lists  
81 13 oak species as critically endangered and 16 as endangered, mostly due to land use conflicts  
82 or overexploitation<sup>5</sup>. About 240 species are maintained in *ex situ* collections, in arboreta and  
83 botanical gardens. Unlike other important temperate forest species, such as conifers, oaks are  
84 not intensively cultivated in artificial forest plantations. Forest renewal is driven mostly by  
85 natural regeneration, and oak plantations often target specialist output markets, for veneer,  
86 cork or truffles. In many countries, oaks are also used outside their native distribution range,  
87 in urban forestry, for example, in which they are planted in parks and streets. Horticultural  
88 cultivars have occasionally been selected for these highly specialized purposes.

89 Oaks provide major ecosystem services, ranging from the provision of raw construction  
90 materials and the regulation of natural resources, to the conservation of biodiversity and the  
91 provision of recreational and cultural services<sup>6</sup>. Oaks have been making an invaluable  
92 contribution to human society since humans first reached the Northern Hemisphere, when  
93 acorns were a regular part of the human diet<sup>7</sup>. Timber can be obtained from most temperate  
94 oak species, but oaks have always fulfilled multiple functions in human societies, by  
95 providing a combination of habitat, economic and cultural services<sup>8</sup>. With recent increases in  
96 public awareness of the environment, forest ecosystem services have been extended to include



97 the enhancement of carbon sequestration and biomass production for bioenergy purposes.  
98 Oaks produce numerous raw materials, including wood, cork, fiber, biomass, and  
99 biomolecules; these raw materials are used to produce diverse manufactured products for the  
100 construction, food, pharmaceutical, and cosmetics industries<sup>9</sup>. This tremendous utility of oaks  
101 is illustrated by the diverse uses of wood, bark (cork), leaves, and even acorns. Oak wood is  
102 frequently used for fuel, timber frames, interior paneling, veneers, and barrels for wines and  
103 spirits, whereas cork is use to make stoppers for bottles and in coverings for floors, walls and  
104 ceilings. Tannins have been extracted from oaks for centuries, for use in the leather industry,  
105 and oak secondary metabolites are now used in the cosmetics industry. Finally, there is a  
106 renewed interest in the possible use of acorns in the human diet, for both nutritional and  
107 ecological reasons, to meet the challenges raised by human population growth in a context of  
108 substitution for food products with a high carbon cost<sup>10</sup>. Oaks also generate other important  
109 biological products by providing a habitat for associated species. Edible mushrooms, such as  
110 boletes and truffles in particular, are the fruiting bodies of mycorrhizal fungi that grow in  
111 association with oak roots and are harvested in many countries for their gastronomic and  
112 nutritional qualities. Iron gall ink, which was used for centuries for the writing of official  
113 documents and parchments, to ensure that they did not fade, is made from iron salts and gallic  
114 acid from oak galls. Oaks also provide ecological services as single trees and as forests, by  
115 offering shelter to a very large range of fungi, insects, birds, and other wildlife, the list of  
116 species benefiting from these services being continually updated and lengthened. In many  
117 parts of the world, oak forests have been assigned functions in habitat conservation,  
118 contributing to the preservation of natural resources, such as water or soils.

119 Oaks also occupy a special position in science, for case studies of tree biology and evolution,  
120 and as a major research tool in the fields of archeology, history and climatology<sup>11</sup>. Oaks are  
121 very long-lived, and oak-ring width series in Central Europe have been reconstructed as far

122 back as 8,480 BC. These ring series are used as a standard dating tool with a yearly resolution  
123 in archeology, and, in some cases, as a tool for dendro-provenancing<sup>12</sup>. This resource is  
124 continually updated with data from archeological remains, opening up additional possibilities  
125 for applications in climate reconstruction<sup>13</sup>. Oak microfossil remains are frequent and widely  
126 distributed, due to the past and present widespread distribution of these trees, and may  
127 therefore serve as biological indicators of previous plant distributions. The use of oak-ring  
128 series also poses new research questions concerning the stasis or microevolution of oaks  
129 across the Holocene and Anthropocene. Climate reconstruction, inferred from ring series,  
130 assumes the conservation of a climate-growth relationship, which may be challenged by the  
131 plastic or evolutionary response of oaks to environmental changes. These questions have  
132 triggered genetic and genomic investigations of the ability of long-lived species to adapt to  
133 rapid environmental changes.

## 134 **2. Reference genome sequencing, assembly and anchoring**

### 135 **2.1. BAC sequence analysis**

#### 136 **2.1.1. Construction and screening of libraries, sequencing and annotation**

##### 137 *BAC library construction*

138 Two BAC libraries were constructed from high-molecular weight genomic DNA from the *Q.*  
139 *robur* “3P” accession, partially digested with *EcoRI* for one library, and *HindIII* for the other.  
140 The *EcoRI* library, which was obtained from Clemson University (CUGI), was generated by a  
141 standard procedure<sup>14</sup>, as previously described<sup>15</sup>. This library comprises 92,160 BAC clones  
142 with a mean insert size of 135 kb, corresponding to approximately 12x coverage of the  
143 haploid pedunculate oak genome. A second BAC library was constructed, with *HindIII*  
144 digestion, to increase genome coverage and reduce the bias associated with the uneven

145 distribution of restriction sites. The *HindIII* library was constructed at the French Plant  
146 Genomic Resource Center (CNRGV, <http://cnrgv.toulouse.inra.fr/>). Nuclei were isolated from  
147 young leaves<sup>14</sup>. High-molecular weight DNA was partially digested with *HindIII* and  
148 subjected to size selection and the ligation of appropriately sized fragments into the  
149 pIndigoBAC-5 *HindIII*-Cloning Ready vector (Epicentre Biotechnologies, Madison,  
150 Wisconsin, USA). This library contained 98,304 clones with a mean insert size of 120 kb,  
151 providing 14x coverage of the haploid genome. These two BAC libraries are available from  
152 the CNRGV (<http://cnrgv.toulouse.inra.fr/Library/Oak>) under accession codes Qro-B-  
153 EnglishOak 3P (*EcoRI*) and Qro-B-3Ph (*HindIII*).

#### 154 *Screening of BAC libraries*

155 The two BAC libraries were arranged in plate and row pools for PCR screening, as described  
156 by Chalhoub et al.<sup>16</sup>. Three sets of BAC clones were screened (summarized in  
157 **Supplementary Data Set 10 sheet #1**): i) allelic BACs, to validate the assembly procedure  
158 for the diploid genome sequence, i.e. the presence of distinct scaffolds (haplotypes)  
159 corresponding to the allelic BACs, ii) BACs carrying expressional or positional candidate  
160 genes coinciding with QTLs for water-use efficiency, bud burst or epinasty, for further studies  
161 aiming to characterize QTLs associated with adaptive traits, and iii) BACs selected at random  
162 or on the basis of BAC end sequences. The primer pairs for library screening were designed  
163 from expressed sequence tags, gene sequences, genetic markers or BAC end sequences. PCR  
164 was performed as described by Faivre-Rampant et al.<sup>15</sup>. The success of PCR amplification  
165 was checked by subjecting the PCR to electrophoresis in 2% agarose gels. Positive plate pools  
166 were used to identify potential clones, which were subsequently validated by a second PCR  
167 analysis of individual clones. For the identification of allelic BAC clones, the pools were  
168 screened with primer pairs specific to single-copy microsatellite loci shown during genetic  
169 mapping experiments to be heterozygous in the reference “3P” genotype<sup>17</sup>. Each allelic BAC

170 clone was selected by visualizing length polymorphisms between PCR products or by direct  
171 sequencing of the products of PCR amplification for biallelic markers.

### 172 *Sequencing and annotation of BAC inserts*

173 In total, 34 BAC inserts were fully sequenced and annotated. Selected clones were cultured  
174 individually on LB medium and DNA was isolated by the standard alkaline method<sup>16</sup>. DNA  
175 inserts were sequenced in pools at 40x coverage, with the 454 mate-pair (5 kb) procedure. The  
176 sequence reads were assembled with Newbler (version MapAsmResearch-04/19/2010-patch-  
177 08/17/2010). Additional sequencing was carried out with the Illumina MiSeq platform  
178 (paired-end overlapping reads of 2 × 250 bp) at a coverage depth of 400x, and GapCloser (-  
179 V1.12-6) software was used to reduce the gaps between contigs.

180 Repeated elements were identified and classified in a two-step approach: i) Censor software  
181 and Repbase V21.08<sup>18</sup> were initially used (see Plomion et al.<sup>19</sup>), but detection was limited to  
182 BAC insert regions displaying identity to sequences in Repbase; ii) searches for the remaining  
183 repeated elements were performed with the library of consensus repetitive elements presented  
184 in section 3.1. Structural and functional gene annotations were added to the BAC sequence, as  
185 described in the approach presented in section 3.3, using: i) Eugene to integrate *ab initio* and  
186 similarity-based gene finding programs<sup>20</sup>, and ii) FunAnnotPipe, an in-house bioinformatic  
187 pipeline based principally on InterproScan<sup>21</sup>. The data were then manually curated with  
188 BLAST tools from the NCBI website and NetGen2<sup>22</sup> for the confirmation of exon/intron  
189 boundaries. Transcript evidence (ESTs and oak unigenes<sup>23</sup> were used to establish gene model  
190 structures. We also used FGENESH<sup>24</sup> and Augustus<sup>25</sup> software to confirm or update Eugene  
191 predictions, with *Vitis vinifera* or *Theobroma cacao* as the model. Some short-gene models  
192 (encoding < 50 amino acids) were removed. Manually curated genes were then compared  
193 with gene models predicted from the genome sequence.

194 *Haplotype diversity analysis*

195 We compared sequences between allelic BACs previously reported by Plomion et al.<sup>19</sup>, using  
196 Dotter Yass software (<http://bioinfo.lifl.fr><sup>26</sup>). Local alignments were generated with NUCmer  
197 from the MUMmer package<sup>27</sup> and visualized with the Easyfig pipeline  
198 <http://easyfig.sourceforge.net><sup>28</sup>.

199 *Data availability*

200 BAC sequences were deposited in the European Nucleotide Archive under accession numbers  
201 LT99005-LT99038 (see **Supplementary Data Set 10 sheet #1** for the accessions). The 34  
202 BAC sequences, with their annotations, are available from the oak genome browser  
203 ([https://urgi.versailles.inra.fr/WebApollo\\_oak\\_PM1N/PseudoMolecule.html](https://urgi.versailles.inra.fr/WebApollo_oak_PM1N/PseudoMolecule.html)). The track  
204 “Gene\_BAC\_manual” provides manually curated gene models.

205 **2.1.2. Results of BAC sequence analysis**

206 Eight of the 34 sequenced BAC inserts were assembled into continuous sequences without  
207 gaps. The others formed a set of oriented contigs separated by stretches of 100 nucleotides.  
208 Each BAC corresponded to one or two scaffolds of the diploid version of the oak genome  
209 sequence (**Supplementary Data Set 10 sheet #1**). Gaps were flanked by low-complexity  
210 repeat sequences. One of the 34 BACs sequenced (#10P13) corresponded to chloroplast  
211 DNA, nine corresponded to randomly picked clones from the libraries and 24 corresponded to  
212 selected clones identified by PCR screening with single-copy genetic markers or candidate  
213 genes. BLAST-n analysis with primer, genetic marker or candidate gene sequences confirmed  
214 the presence of these sequences in the targeted BAC. The nuclear BAC assembly covered  
215 4,282,332 bp. The mean G+C content of nuclear BAC sequences was 35.9%, and all BAC  
216 sequences had G+C contents close to this mean. A similar G+C content was reported in a  
217 previous study for 20,056 BES<sup>16</sup>.

218 The 33 BAC sequences corresponding to nuclear regions were screened for simple sequence  
219 repeats (SSRs). In total, 1,342 perfect SSRs with a motif length of two to five nucleotides  
220 were detected within the 4,282,332 bp analyzed, corresponding to one SSR every 3,200 bp. A  
221 previous study had already shown the density of SSRs within the oak genome to be high. As  
222 previously described for BAC end sequences<sup>16</sup>, AT/TA dinucleotide motifs were the most  
223 abundant.

224 Repeat masking resulted in the masking of 24.7% of the BAC sequences, 99% of which  
225 corresponded to transposable elements (TEs), the other 1% corresponding to other types of  
226 sequence repeats. The percentage repeat content varied from 32% (clone #138D21) to 49%  
227 (#108022). Retrotransposons were the most abundant repeated elements, with 27% of the  
228 Gypsy type and 15% of the Copia type (**Supplementary Table 23**). A *de novo* repeat search  
229 detected 38.5% TEs, a value lower than that estimated for the whole genome (52%).

230 Putative genes were predicted with a combination of Eugene, trained on the oak genome,  
231 FGENESH and Augustus (**Supplementary Table 24**). In total, 322 gene models were  
232 predicted. Manual annotation was performed, with BLAST queries against NCBI non-  
233 redundant proteins, oak unigenes and oak ESTs available from the NCBI Short Read Archive.  
234 Exon and intron structures were manually optimized on the basis of evidence for splice sites.  
235 After manual curation, 44 of the 322 predicted genes were found to be located at the end of  
236 BAC sequences and were not curated, 28 were deleted (corresponding to gene models  
237 encoding < 50 amino acids), and intron/exon structure remained unresolved in 50, which were  
238 therefore considered “problematic”. Thus, 200 predicted genes with a resolved intron/exon  
239 structure were finally approved. Intron/exon structure was modified for 37 of these 200 genes,  
240 merged for 25 genes, and 138 genes (i.e. 69%) had already been accurately predicted by the  
241 automatic annotation procedure described in section 3.3. This proportion is close to that of  
242 validated CDS from the set of 1,714 manually curated genes (79%, see section 3.5). We thus

243 found a mean of six genes per 100 kb, corresponding to one one protein-coding gene per 16.7  
244 kb (**Supplementary Table 24**), a value twice the mean gene density across the genome (3.2  
245 genes/100 kb). This bias probably results from the selection of genes for insertion into BACs.  
246 Gene function was assigned on the basis of sequence identity to proteins within the  
247 phytozome and NCBI non-redundant protein database and/or the presence of Pfam domains  
248 (**Supplementary Data Set 10 sheet #2**).

### 249 2.1.3. Comparison of genomic structure between haplotypes

250 Primer pairs of mapped simple sequence repeat (SSR) markers, PIE033, PIE260, PIE275,  
251 PIE257, and ZQR111 and the CL4 candidate gene, were used to screen the two BAC libraries  
252 (**Supplementary Data Set 10 sheet #1**) for allelic BAC identification. Allelic BAC clones  
253 were identified by sequencing of the PCR products. Six sets of homologous BAC clones  
254 (50E24-177A20/38C23, 27L3-48K1/72H20, 5E10-107I07, 64H03-30P1, 4E16/12J1-121F1,  
255 and 4N17-11F22) were selected and sequenced. Except for BACs 111F22 and 64H03, an  
256 analysis of BAC sequences confirmed the presence of the markers within the BAC clones.  
257 The sequences of BACs 4E16 and 12J1 overlapped fully. We therefore removed 4E16 from  
258 further analyses. Surprisingly, 4N17 and 111F22 did not overlap, and neither was therefore  
259 considered in subsequent analyses. The overlap between the remaining allelic BACs ranged  
260 from 22 kb to 84 kb and the mean sequence identity in overlapping regions was 97% (Evalue  
261 =0.0) (**Supplementary Table 25** and **Supplementary Table 26**). Pairwise sequence  
262 alignment revealed insertions and deletions within the intergenic regions, for all pairs  
263 (**Supplementary Fig. 26**). We identified TE insertion/deletion as the main factor accounting  
264 for the considerable structural polymorphism observed between allelic BACs. Gene order and  
265 structure were nevertheless well conserved.

## 266        **2.2. Comparison of the V1 and V2 assemblies and assembly validation**

267        We compared the previous release (version 1: V1<sup>19</sup>) of the diploid assembly with the current  
268        release obtained by the addition of synthetic long reads generated by highly parallel library  
269        preparation and the local assembly of short read data. Standard metrics revealed a huge  
270        difference in terms of contiguity (see **Supplementary Table 27**). Indeed, the N90 of our  
271        assembly was six times better than that of the previous assembly, and the proportion of  
272        ambiguous bases was only 4.6% for our assembly, whereas it was 11.6% for the previous  
273        assembly. We used Busco to assess the degree of gene completion for the two assemblies. The  
274        V2 release presented a completeness of 90.8% (**Supplementary Table 27**), i.e. greater than  
275        the V1 assembly (90.4%). Standard metrics also suggested that haplotypes were better  
276        resolved in the V2 release (as indicated by the cumulative sizes of the assemblies). We then  
277        validated the better differentiation between the two haplotypes of the V2 assembly, by  
278        mapping a dataset of Illumina paired-end reads (2x250 bp) on both assemblies. Collapsing the  
279        two haplotypes should increase the observed coverage by a factor of 2, whereas keeping the  
280        two haplotypes separate should yield identical observed and expected coverages. As expected,  
281        we observed fewer regions with twice the coverage in the V2 release (**Supplementary Fig.**  
282        **1**). We also aligned the V1 (**Supplementary Fig. 27, Supplementary Fig. 28,**  
283        **Supplementary Fig. 29**) and V2 (**Supplementary Fig. 11, Supplementary Fig. 12,**  
284        **Supplementary Fig. 13**) releases with three pairs of BACs, each pair corresponding to the  
285        two alleles of the same genomic region. We first aligned the whole assembly against each  
286        BAC with BLAT alignment tool<sup>29</sup> and default parameters, retaining only the scaffold with the  
287        highest alignment score. Alignment positions were then extracted from a NUCmer<sup>30</sup>  
288        alignment (identity > 90%) between each BAC and the corresponding scaffold. We selected  
289        SNPs between allelic BACs, using a sliding window of 100 bp, and we used a seed sequence  
290        of 41 bp (20 bp on either side of the SNP) to retrieve the allelic variants of the scaffolds. We



291 generated graphical representations (see **Supplementary Fig. 11, Supplementary Fig. 12,**  
292 **Supplementary Fig. 13, Supplementary Fig. 27, Supplementary Fig. 28, Supplementary**  
293 **Fig. 29**) highlighting the advantages of long reads for differentiating between haplotypes. The  
294 V1 release often merged the two haplotypes into a single scaffold for the three genomic  
295 regions, whereas the V2 release contained a pair of scaffolds for each pair of BACs.  
296 Furthermore, the V2 scaffolds showed fewer switches between haplotypes than the V1 release  
297 (see **Supplementary Fig. 11, Supplementary Fig. 12, Supplementary Fig. 13,**  
298 **Supplementary Fig. 27, Supplementary Fig. 28, Supplementary Fig. 29**).

### 299 **2.3. Pseudomolecule construction**

300 Scaffolding can extend the contiguity of a genome sequence assembly by orders of magnitude  
301 relative to contigs, but the construction of a chromosome-scale genome requires either  
302 physical or genetic maps to anchor the scaffolds. We used a genetic map for this purpose. A  
303 composite genetic map was first established with LPmerge software<sup>31</sup>, bringing together 5,589  
304 already mapped EST-SSR and SNP markers from eight individual linkage maps<sup>17,32</sup>  
305 (**Supplementary Data Set 2 sheet #1**), including one map for accession '3P' used to establish  
306 the reference genome sequence. Gene model sequences for the 5,589 mapped loci were then  
307 aligned with the 1,409 scaffold sequences, using BLAT<sup>29</sup> ( $\geq 95\%$  identity). In total, 2,615  
308 unique scaffold/marker relationships (**Supplementary Data Set 2 sheet #2**) were identified  
309 and classified into four categories (**Supplementary Table 28**). Overall, the scaffold-  
310 anchoring strategy (taking into account 2,285 markers from the most reliable assigned  
311 scaffolds, i.e. from categories 1, 2 and 3) delivered 612 (43%) anchored scaffolds, covering  
312 624.8 Mb (77%) of the haplome. Additional scaffolds were then anchored onto the 12 oak  
313 linkage groups, according to the synteny-driven strategy illustrated in **Supplementary Fig. 2**  
314 (see Pont et al.<sup>33</sup> for the details). To this end, the 1,409 scaffold sequences were aligned  
315 (BLAST-n,  $>70\%$  identity) with the eight chromosomal sequences of *Prunus persica* (a

316 species phylogenetically related to *Q. robur*). This approach yielded a set of 653 scaffolds,  
317 including 259 scaffolds anchored by synteny only (i.e. locally ordered according to the gene  
318 order in *Prunus persica*), and 394 scaffolds already anchored and ordered with markers  
319 (**Supplementary Data Set 2 sheet #3**). These scaffolds highlighted links shared between the  
320 peach genome and the oak map and made it possible to intercalate the 259 scaffolds initially  
321 anchored on the basis of synteny alone. Using the second set of 394 scaffolds, and comparing  
322 gene order between the *Prunus* and *Quercus* genomes, we estimated the accuracy of the  
323 syntenomic approach for the correct positioning and orientation of the first set of scaffolds  
324 (anchored on the basis of synteny alone) at 86%. The 12 oak pseudomolecules (hereafter  
325 referred to as chromosomes and numbered according to the SNP-based linkage map<sup>32</sup>) were  
326 then constructed on the basis of 871 (62%) anchored and oriented scaffolds, with the filling in  
327 of 100-nucleotide tracts between consecutive scaffolds (**Supplementary Data Set 2 sheet**  
328 **#4**): i) 218 scaffolds anchored and ordered by genetic markers only, ii) 259 scaffolds anchored  
329 by synteny only, with local ordering according to gene order in peach, and iii) 394 scaffolds  
330 anchored and ordered by both procedures. Overall, the 871 scaffolds cover 716.6 Mb (i.e.  
331 88% of the haplome) and contain 23,220 (90%) genes. The 12 chromosomes and the 538  
332 unanchored scaffolds are available from the oak genome JBrowse  
333 ([https://urgi.versailles.inra.fr/WebApollo\\_oak\\_PM1N/PseudoMolecule.html](https://urgi.versailles.inra.fr/WebApollo_oak_PM1N/PseudoMolecule.html)).

334 Based on scaffold order and orientation on the 12 chromosomes, the oak genome browser was  
335 populated with a “marker” track including an optimized set of markers tolerant of inversions  
336 between physical and genetic positions within a maximum window of 5 cM. This track was  
337 designed to project the position of any quantitative trait locus (QTL) from the eight individual  
338 linkage maps onto the oak genome sequence, to facilitate subsequent biological interpretation  
339 of their genetic bases. The track was created according to the procedure described in  
340 **Supplementary Fig. 30**. We found that 2,127 of the 2,615 markers (retained for scaffold

341 anchoring) fitted the criteria presented in **Supplementary Fig. 30** (referred to as set#1 in  
342 **Supplementary Data Set 2 sheet #1**), and 1,943 were retained from the other set of 2,974  
343 markers initially excluded from scaffold anchoring (set#2 in **Supplementary Data Set 2**  
344 **sheet #1**). As a result, the “marker” track included 4,070 markers spanning the 12 linkage  
345 groups (red horizontal lines in **Supplementary Fig. 31**). The alignment of each marker set  
346 with the 12 chromosomes is shown in **Supplementary Fig. 32**. Overall, the rank correlation  
347 between genetic and physical positions ranged from 0.991 to 0.999 (**Supplementary Table**  
348 **29**).

### 349 **3. Genome annotation**

#### 350 **3.1. Detection and annotation of transposable elements**

351 As in other sequenced plant genomes, the class I retrotransposon fraction predominated (70%  
352 of TE sequences), consisting of 53% LTRs (long terminal repeats: 26% Gypsy-like and 21%  
353 Copia-like) and 16% non-LTR retrotransposons (mostly LINE). Class II DNA transposons  
354 accounted for 15% of TE sequences, and 92% of the transposons in this fraction were TIRs  
355 (terminal inverted repeats) (**Supplementary Fig. 3, Supplementary Table 4**).

356 Thirteen of the 1,750 consensus sequences (0.6% of the TE content) were further  
357 characterized as Caulimoviridae sequences (see section 3.2). **Supplementary Table 30** shows  
358 a comparative analysis of TEs across the 16 species (including oak) used for the comparative  
359 genomic analysis in section 4. We found no correlation between TE content and the  
360 phylogeny of these species (based on NCBI Taxonomy Browser findings) (**Supplementary**  
361 **Fig. 33**).

### 3.2. Identification and preliminary characterization of endogenous Caulimoviridae

362 Plant viruses can have a major impact on the populations and genomes of their hosts.  
363 Paleovirology approaches can provide insight into virus-host associations by detecting  
364 fragments of viral genomes integrated in host genomes<sup>34</sup>. Caulimoviridae is a major family of  
365 plant viruses with deleterious effects on plant populations and crop production<sup>35</sup>.  
366 Caulimoviridae do not need to integrate into the host genome during their replication cycle,  
367 but such integration occurs randomly and repeatedly, resulting in the presence of significant  
368 numbers of Caulimoviridae genome fragments in plant genomes<sup>36,37</sup>. We screened the oak  
369 genome for the presence of genomic fragments from endogenous Caulimoviridae. Reverse  
370 transcriptase (RT) is the best conserved domain of the Caulimoviridae family, so we began by  
371 searching the oak genome for RT domains displaying the highest levels of identity to  
372 homologs from known Caulimoviridae genera. Protein clustering (>80% identity) identified  
373 eight groups including seven comprising several sequences corresponding to RT sequences  
374 from Caulimoviridae. This viral family contains eight genera. Phylogenetic analysis revealed  
375 that one of the RT cluster from endogenous oak Caulimoviridae belonged to the genera  
376 *Petuvirus*, whereas the other seven belonged to the recently discovered *Florendovirus*  
377 genera<sup>37</sup> (**Supplementary Fig. 34**).

379 We then performed targeted clustering (98% identity and 95% length) on the nucleotide  
380 sequences corresponding to putative Caulimoviridae loci in the oak assembly and built  
381 consensus sequences based on the multiple sequence alignment (MSA) for each cluster. We  
382 then clustered the consensus sequences with the closest evolutionary relationships to  
383 Caulimoviridae into seven families, each of which displayed at least 90% local identity. In  
384 five families, the longest consensus sequence accounted for a complete, or almost complete  
385 Caulimoviridae genome and was, thereafter, considered the representative sequence for each  
386 family. Remarkably, we noticed that, while representative consensus sequences were built

387 from the MSA of only a few highly similar copies, we found cases in which consensus  
388 sequences corresponding to truncated variants of the representative Caulimoviridae genomes  
389 were generated from the MSA of hundreds of almost identical copies (**Supplementary Fig.**  
390 **35**). We compared the representative sequences with the library of repetitive elements built by  
391 TEdenovo and found that most were well represented in this library (see section 3.1).  
392 Collectively, copies of consensus sequences from the TEdenovo library corresponding to  
393 fragments of the Caulimoviridae genome accounted for 4.4 Mb of the REPET annotation, 0.6  
394 % of the haplome, and were distributed evenly over the 12 chromosomes (**Supplementary**  
395 **Fig. 36**).

### 396 **3.3. Gene prediction and functional annotation of protein-encoding genes**

397 We retained a core set of 25,808 high-confidence genes (listed in **Supplementary Data Set**  
398 **1**). The total gene space was 74 Mb in size, with a density of 0.32 genes/10 kb on average  
399 (**Supplementary Table 31**). This density is lower than that reported for other species, such as  
400 *A. thaliana* (2.3 genes /10 kb; TAIR 10<sup>38</sup>), *P. persica* (1.22 genes /10 kb<sup>39</sup>), *M. domestica*  
401 (0.78 genes /10 kb<sup>40</sup>), but similar to that for species with a similar genome size and TE  
402 content, such as *E. grandis* (817 Mb; 50% TE; 0.45 genes /10 kb<sup>41</sup>), *C. papaya* (815 Mb; 52%  
403 TE; 0.34 genes/10 kb<sup>42</sup>) and *C. clementina* (816 Mb; 43% TE; 0.3 genes /10 kb; <sup>43</sup>). Overall,  
404 99% of the predicted *Q. robur* genes (i.e. 25,516) were found to encode proteins, with at least  
405 domain/motif, localization/targeting signal, or similarity-based evidence (**Supplementary**  
406 **Fig. 37**).

### 407 **3.4. TEs and genome dynamics**

#### 408 **3.4.1. Estimation of the age of TE families from consensus sequences**

409 The consensus sequences used to annotate the TE copies in the oak genome represent  
410 common ancestral structural variants (TE families) of TEs transposing in the oak genome in

411 the past<sup>44</sup>. Indeed, they were constructed from highly repeated genome segments (see section  
412 3.1). We investigated the evolution of TEs in the oak genome, by plotting and comparing the  
413 observed divergence (1-identity %) of TE copies from their respective consensus sequences,  
414 to estimate their relative age<sup>45</sup>. We performed this analysis separately for different orders of  
415 TEs (LTR and Non-LTR retrotransposons, TIRs and Helitron DNA transposons) and  
416 superfamilies (LTR Gypsy and Copia superfamilies). Most TE copies (i.e. 62% representing  
417 44% of the TE space) displayed more than 15% divergence from the corresponding consensus  
418 sequence (**Supplementary Fig. 38**), whereas only 6.7% of TE copies (17% of the TE space)  
419 displayed low levels of divergence (<5%) from their respective consensus. This result  
420 suggests that all the TEs present in the oak genome are relatively ancient, contrasting with  
421 findings for *A. thaliana*, in which 73% of TE copies (52% of the TE space) display more than  
422 15% divergence and 10.5% of the copies (26% of the TE space) display less than 5%  
423 divergence<sup>45</sup>. By contrast, the divergence of the LTR retroelement superfamilies Gypsy and  
424 Copia suggests that TE activity continued until fairly recently for the elements of these  
425 families.

#### 426 3.4.2. Retrotransposition dynamics

427 We first refined the annotation of LTR retrotransposons with the dedicated LTR Harvest  
428 tool<sup>46</sup>, retaining the 5,904 complete elements that displayed more than 90% reciprocal overlap  
429 with those from the general annotation of TEs with the REPET pipeline. We then classified  
430 these elements into families by sequence clustering of their left LTRs with SiLiX, as  
431 previously described<sup>47</sup>. We analyzed retrotranspositional history on a subset of 4,333 elements  
432 from families of more than 200 elements. The insertion date of each element was calculated  
433 from the sequence similarity between its left and right LTRs, as determined by LTR Harvest,  
434 as follows:  $\text{date} = ((1 - (\% \text{ identity}/100)) / 2.6) \times 10^8$ <sup>48</sup>. We plotted the data as density  
435 histograms representing the distribution of insertion dates within each family, together with a

436 curve representing local density estimates (**Supplementary Fig. 39**). We observed a general  
437 asynchronism of retrotranspositional history, with families displaying one of three contrasting  
438 patterns of activity history: ancient (e.g. fam #6 and #10), constant (e.g. fam #8) or recent  
439 (e.g. fam #12, #14 and #29). This result suggests that the complexity of the oak genome  
440 developed through repeated bursts of retrotransposition over the last five million years, with  
441 no clear increase in such activity in the recent past. These findings differ from those for  
442 annual plants of similar genome size, for which genome complexification has occurred more  
443 recently, through concomitant bursts of transposition (over the last 1-2 million years<sup>49</sup>).

#### 444 3.4.3. Distribution of TEs and genes in the oak genome

445 TEs are often associated with genome rearrangements. They have been found in breakpoint-  
446 containing windows in comparisons of *A. thaliana* and *A. lyrata*<sup>38</sup>. In maize and *A. thaliana*,  
447 the pericentromeric regions of the chromosomes are highly enriched in LTR retrotransposons  
448 of the Gypsy superfamily, and maize also displays an accumulation of TEs from the Copia  
449 superfamily in regions of euchromatin<sup>50,51</sup>. We investigated whether TEs, particularly those of  
450 the Gypsy and Copia superfamilies, were evenly distributed throughout the oak genome. We  
451 calculated the percentage of TEs and annotated genes in sliding windows (300 kb, with a 200  
452 kb overlap). We found that TEs accumulated in gene-poor regions. We also identified a  
453 region of chromosome #2 displaying strong TE accumulation, potentially corresponding to  
454 the centromeric region (**Supplementary Fig. 40**). The Copia elements tended to accumulate  
455 away from the potential centromere, both upstream and downstream. This pattern was  
456 particularly marked for chromosome #2 (**Supplementary Fig. 41**). Below, we consider the  
457 potential role of TEs located in close proximity to genes.

#### 458 3.4.4. Role of TEs in gene expansion and tandem duplication

459 We investigated the possible role of TEs in gene duplication and/or gene family expansion, by  
460 comparing the genomic environment (in terms of proximity to TEs) of several categories of  
461 genes according to their distance to the closest TE. The distance from each gene to the closest  
462 TE was calculated with getDistance.py from the S-MART package<sup>52</sup>. Only distances up to 5  
463 kb were considered. We assessed the dependence between the different classes of distances  
464 and belonging to an expanded gene family, for oak genes. We found that genes from  
465 expanded gene families (see section 4.1.2) were closer to TEs than other genes (Chi-squared  
466  $p$ -value  $< 2.2e^{-16}$ ; **Supplementary Fig. 42**). TE-mediated gene family expansion has been  
467 described in multiple species<sup>53,54</sup>. We obtained similar results for tests of the dependence of  
468 different classes of distances and membership of the TDG (tandem duplicated genes), LDG  
469 (long distance-duplicated genes) and SG (singleton genes) classes. TDGs were closer to TEs  
470 than SGs or LDGs (Chi-squared  $p$ -value  $< 2.2e^{-16}$ ; illustrated for SG in **Supplementary Fig.**  
471 **43**), but no significant difference was observed for comparisons of LGD and membership of  
472 the SG class. This result suggests that TEs may favor tandem duplications leading to gene  
473 family expansion.

#### 474 3.4.5. Horizontal transfer of TEs

475 We studied the horizontal transfer of TEs (HTT), by performing an *in silico* analysis on all  
476 plant genomes available from the NCBI and Phytozome databases, focusing on LTR  
477 retrotransposons. We chose one element for each family identified in the annotation step.  
478 BLAST-n searches were performed to identify high levels of nucleotide sequence identity,  
479 with the NCBI nr (<http://www.ncbi.nlm.nih.gov/>) and Phytozome v9.0  
480 (<http://www.phytozome.net/>) databases. Candidates for HTT (listed in **Supplementary Table**  
481 **32**) were detected by applying a 90% identity threshold<sup>47</sup>, to ensure that we detected



482 horizontally, as opposed to vertically inherited TE sequences. Eight horizontal transfers of  
483 LTR-retrotransposons were identified. All potential candidates were validated by checking  
484 that the LTR retrotransposon sequences were located on large contigs and not on isolated,  
485 short sequences in genome assemblies, and that the high degree of sequence identity was  
486 limited to the elements themselves and not in their flanking sequences, to eliminate possible  
487 contamination during genome assemblies and annotation errors. Moreover, analysis with  
488 Dotter software confirmed that all the horizontally transferred elements harbored both the  
489 LTR and an internal sequence in the two species involved. We identified six HTT events  
490 involving oak and grapevine (*Vitis vinifera*), with sequence identities of 90 to 94%. We found  
491 one HTT event involving oak, grapevine and peach (*Prunus persica*). The HTT event between  
492 grapevine and peach had already been identified (BO6) in the analysis by El Baidouri et al.<sup>47</sup>,  
493 and 92% identity was found between the corresponding sequences from the two species. We  
494 also identified one HTT event between oak and poplar (*Populus trichocarpa*), with 91%  
495 identity. HTTs have been shown to occur frequently between flowering plants<sup>47</sup>, but our  
496 findings for the oak genome provide the first evidence of multiple HTTs in a single species.

### 497 **3.5. Gene prediction, functional annotation of protein-encoding genes and manual** 498 **curation**

499 The total gene space of the 25,808 predicted proteins was 74 Mb in size, with a density of  
500 0.32 genes/10 kb on average (**Supplementary Table 31**). This density is lower than that  
501 reported for other species, such as *A. thaliana* (2.3 genes /10 kb; TAIR10<sup>38</sup>), *P. persica* (1.22  
502 genes /10 kb<sup>39</sup>), *M. domestica* (0.78 genes /10 kb<sup>40</sup>), but similar to that for species with a  
503 similar genome size and TE content, such as *E. grandis* (817 Mb; 50% TE; 0.45 genes /10  
504 kb<sup>41</sup>), *C. papaya* (815 Mb; 52% TE; 0.34 genes/10 kb<sup>42</sup>) and *C. clementina* (816 Mb; 43%  
505 TE; 0.3 genes /10 kb<sup>43</sup>). Overall, 99% of the predicted *Q. robur* genes (i.e. 25,516) were

506 found to encode proteins, with at least domain/motif, localization/targeting signal, or  
507 similarity-based evidence (**Supplementary Fig. 37**).

508 Experts manually checked (using WebAppolo) the protein-coding sequence structures of  
509 1,714 mRNAs. They validated 79% of the transcripts without the need for additional  
510 modification, whereas the remaining 21% had to be corrected (**Supplementary Table 12**).  
511 We then aligned the coding sequences of these 1,714 mRNAs, to validate 2,067 genes of the  
512 *Q. robur* genome (diploid V2). Finally, 1,176 of these 2,067 genes were recovered in the *Q.*  
513 *robur* haplome. In the following sections we provide information concerning some of the  
514 gene families manually curated.

### 515 3.5.1. Aquaporin

516 Forty genes encoding putative aquaporins were identified in the *Q. robur* haplome.  
517 Aquaporins are intrinsic channel proteins found in all organisms. Their overall structure is  
518 highly conserved, with six transmembrane helices connected by five loops, a tetrad of amino-  
519 acids (helix 2, helix 5 and loop E) forming an aromatic/arginine constriction region (Ar/R  
520 filter), and two membrane embedded half-helices with an asparagine-proline-alanine signature  
521 (NPA motif)<sup>55,56</sup>. Five conserved amino-acid residues discriminated aquaporins from other  
522 major intrinsic proteins<sup>57</sup>. One *Q. robur* gene was invalidated due to the absence of a key  
523 signature (**Supplementary Table 33**).

524 *Q. robur* was found to have aquaporins from the five subfamilies found in higher plants  
525 (**Supplementary Fig. 44**), with 14 plasma membrane-intrinsic proteins (PIPs), nine tonoplast-  
526 intrinsic proteins (TIPs), eight nodulin-26 intrinsic proteins (NIPs), three small basic intrinsic  
527 proteins (SIPs) and five unrecognized X intrinsic proteins (XIPs). Two subclasses of XIPs  
528 were identified in *Q. robur*, with a particular mapping pattern for *XIP2*, suggestive of local  
529 amplification on Qrob\_H2.3\_Sc0000154. Except for the XIPs, the composition of the *Q.*

530 *robur* aquaporin family was similar to those of *Arabidopsis* and maize<sup>58,59</sup>. However, the full-  
531 length *TIP3* gene was missing from the *Q. robur* genome. In several species, TIP3s have been  
532 reported to be specific to maturing and dry seeds<sup>60</sup>. Variations at key motifs and in gene  
533 structure between the *Q. robur* aquaporin subclasses were consistent with published  
534 findings<sup>58,61</sup>. The global rate of tandem duplication in this gene family was 37.5%, which  
535 similar to the overall rate for the oak genome (35.6%).

### 536 3.5.2. MYB

537 MYB genes are characterized by a highly conserved DNA-binding domain (MYB domain)  
538 consisting of up to four imperfect repeats of a sequence of about 52 amino acids in length (R).  
539 They constitute one of the largest families of transcription factors in plants, with members  
540 regulating many key biological processes, including cell fate, developmental processes,  
541 primary and secondary metabolism, and responses to biotic and abiotic stresses<sup>62</sup>. MYB  
542 proteins can be classified into several classes on the basis of the number of contiguous repeats  
543 of the MYB domain. The most abundant of these classes contains MYB proteins with two  
544 repeats of the MYB domain (R2R3-MYBs).

545 We identified 139 R2R3-MYBs, five 3R-MYBs and one 4R-MYB (**Supplementary Table**  
546 **34**). This distribution of MYB proteins is similar to that in other species, such as *A. thaliana*  
547 (126 R2R3-MYBs, five 3R-MYBs, and one 4R-MYB), *E. grandis* (141 R2R3-MYBs) and *V.*  
548 *vinifera* (123 R2R3-MYBs). We performed a comparative phylogenetic analysis of the R2R3-  
549 MYB sequences from *Q. robur*, *P. trichocarpa*, *E. grandis*, *V. vinifera*, *A. thaliana* and *O.*  
550 *sativa* (**Supplementary Fig. 45**). The topology of the phylogenetic tree was similar to that  
551 described for *Arabidopsis*<sup>62</sup>, with most of the subgroups conserved. However, like other  
552 woody perennial plants, oak presented subgroups with more members than in herbaceous  
553 annual plants such as *Arabidopsis* or rice (**Supplementary Fig. 45**). These expanded clusters  
554 in woody plants include the so-called “woody preferential subgroups”, which are completely

555 absent from the basal lineages of bryophytes and lycophytes and from the more recent  
556 Brassicaceae and Monocot lineages<sup>63</sup>. We investigated the possible role of the MYB gene  
557 family in tree habit specialization by classifying R2R3-MYB genes according to their  
558 duplication and expansion profiles in woody perennials. The global rate of tandem duplication  
559 in the R2R3-MYB family (32.4%) was slightly lower than the overall rate for the oak genome  
560 (35.6%). However, the tandemly duplicated MYBs were remarkably enriched within the  
561 woody-expanded subgroups (**Supplementary Fig. 46**, Fisher's exact test  $p$ -value < 0.0001).  
562 A substantial enrichment of tandemly duplicated genes belonging to woody expanded  
563 subgroups has been also observed in other woody plants, such as eucalyptus, poplar and  
564 grapevine<sup>64</sup>.

565 The few genes from subgroups expanded in woody perennials that have been characterized  
566 seem to regulate phenylpropanoid metabolism, mostly controlling flavonoid biosynthesis,  
567 although, in some cases, they also directly or indirectly alter the content of lignin and other  
568 soluble compounds, such as oligolignols or salicinoid phenolic glucosides<sup>64-69</sup>. During  
569 evolution, tandemly duplicated genes have a greater likelihood of being retained if they are  
570 involved in responses to environmental factors<sup>70</sup>. Unlike herbaceous annuals, which die after  
571 reproduction, perennial plants, such as trees and shrubs, must survive many periods of  
572 challenging stressful environmental conditions over their long lifespans. Woody perennial  
573 plants may, therefore, contain more elaborate stress resistance mechanisms. The large number  
574 of tandemly duplicated genes regulating the biosynthesis of flavonoids and other  
575 phenylpropanoid-derived compounds, mostly known to be protective, may enable oak trees to  
576 develop complex protective mechanisms and to adapt woody growth to environmental  
577 conditions. It is also possible that the production of the some of the many phenolic  
578 compounds accumulating in oak heartwood, such as ellagitannins, or the gallotannins found in  
579 oak galls, are controlled by these genes.

580

### 3.5.3. SWEET

581 The host plant supplies the mycorrhizal fungi with hexoses, which support the production of  
582 the external fungal mycelium, a prerequisite for effective nutrient acquisition by hyphal  
583 networks. Plant sugar transporters of the SWEET superfamily deliver sugars to microbes<sup>71</sup>,  
584 and the microbe-specific modulation of *SWEET* gene expression may alter sugar efflux at the  
585 site of colonization<sup>72</sup>. We therefore analyzed the phylogeny of the pedunculate oak SWEET  
586 superfamily, and performed RNAseq analyses to determine whether the abundances of *Q.*  
587 *robur* *SWEET* transcripts were altered by inoculation of the oak clone DF159 with the  
588 ectomycorrhizal fungus (EMF) *Piloderma croceum*<sup>73</sup>, the mycorrhizal helper bacterium  
589 (MHB) *Streptomyces* sp. AcH 505, and the causal agent of oak powdery mildew, *Erysiphe*  
590 *alphitoides*<sup>74</sup>. Oak clone DF159 was micropropagated and rooted for gene expression analysis  
591 as described by Herrmann et al.<sup>75</sup>, and cultivated in gamma-sterilized soil-based microcosms,  
592 as described by Herrmann et al.<sup>74</sup>. Culture and inoculation conditions, RNA extraction,  
593 sequencing and data processing for fungi and bacteria were as described by Tarkka et al.<sup>73</sup>,  
594 Kurth et al.<sup>76</sup> and Herrmann et al.<sup>74</sup>. Sequence data were deposited in the NCBI Short Read  
595 Archive (accessions for *P. croceum*: SRX383906, SRX383899, SRX383898, SRX798260,  
596 SRX798261, SRX798262; for AcH 505: SRX976815, SRX976817, SRX976819,  
597 SRX976827, SRX976829, SRX976831; for *E. alphitoides*: SRX2398909, SRX2398916,  
598 SRX2398917, SRX2398913). *T. magnatum* ectomycorrhizae were sampled on 6-month-old  
599 inoculated *Q. robur* plantlets produced by Robin nurseries (St Laurent du Cros, France),  
600 following their standard protocols. Total RNA was extracted from ectomycorrhizal root tips  
601 of *T. magnatum/Q.robur* using the RNeasy Plant Mini Kit of Qiagen with DNase step and  
602 addition of 20 mg/ml polyethylene glycol to the RLC extraction buffer. Three replicates were  
603 used for RNA-seq. Preparation of libraries from total RNA and 2 x 100bp Illumina HiSeq  
604 sequencing (RNA-Seq) was performed at the GET platform (Génopole Toulouse Midi-

605 Pyrénées, Auzeville, France) following their standard protocol. Quality filtered reads were  
606 aligned to the *Q. robur* haplome reference transcripts using CLC Genomics Workbench 9  
607 (Qiagen). To identify transcripts differentially regulated in ectomycorrhizae compared to  
608 control roots (greenhouse grown non-mycorrhizal roots; ERX1916509-11) the test from  
609 Baggerly et al. implemented in CLC Genomic Workbench and *p*-values from the differential  
610 expression tests were adjusted for false discovery rate (Benjamini & Hochberg). The *T.*  
611 *magnatum* RNA-Seq data are available at NCBI/GEO as Series GSE97122.

612 We identified 14 *SWEET* genes in the oak genome (**Supplementary Fig. 47**), belonging to  
613 the four clades identified in *A. thaliana*<sup>71</sup>. Clade IV seems to have been expanded, with six  
614 members in oak, *versus* only one in *Malus domestica*, two in *Arabidopsis thaliana*  
615 (SWEET16 and SWEET17), two in *Eucalyptus grandis* and three in *Solanum tuberosum*.  
616 Biochemical characterization of the SWEETs of *Arabidopsis thaliana* showed that the  
617 members of clade I and II preferentially encoded monosaccharide transporters, whereas the  
618 members of clade III encoded disaccharide transporters, mostly for sucrose<sup>71,77</sup>.

619 In total, five *SWEET* genes from clades I, III and IV were differentially expressed in oak with  
620 the EMF *Piloderma croceum* and *Tuber magnatum*, the MHB *Streptomyces* sp. AcH 505, or  
621 *Erysiphe alphitoides*. Oak clade I transcript *Qrob\_P322480.2*, homologous to *SWEET1*, was  
622 upregulated by the EMF *P. croceum* and *T. magnatum*. Consistent with these findings,  
623 arbuscular mycorrhiza (AM) formation also leads to *SWEET1* induction in potato and in  
624 *Medicago truncatula*<sup>78</sup>. By contrast, the abundance of the oak *SWEET1* transcript was  
625 decreased by *Erysiphe alphitoides* infection or inoculation with the MHB *Streptomyces* sp.  
626 AcH 505. The *SWEET1* gene therefore displayed differential regulation as a function of the  
627 biotic interaction.

628 The oak clade I *SWEET3* homolog *Qrob\_P321700.2* was induced by *P. croceum* and  
629 *Streptomyces*, and a related gene was among those upregulated in the potato AM symbiosis<sup>79</sup>.

630 All the clade III SWEETs have sucrose transporter activity, and the oak clade III transcript  
631 *Qrob\_P657550.2*, homologous to *SWEET12*, was upregulated upon interaction with *P.*  
632 *croceum* and *Streptomyces*. Interestingly, a related gene is upregulated in the protocorms of  
633 the orchid *Serapias vomeracea* during interaction with an orchid mycorrhizal fungus<sup>80</sup>. By  
634 contrast, most of the transcripts repressed in the arbuscular mycorrhizal symbiosis of potato  
635 corresponded to clade III SWEETs<sup>79</sup>, suggesting that clade III SWEETs are differentially  
636 regulated in different types of mycorrhizal interactions.

637 Clade IV SWEETs are vacuolar glucose, fructose and sucrose carriers in *A. thaliana*<sup>81</sup>. The  
638 oak clade IV *SWEET17* homolog *Qrob\_P216890.2* was upregulated upon interaction with *P.*  
639 *croceum* and *Streptomyces*, as also reported for the closely related potato *StSWEET17a* and  
640 *StSWEET17b* in AM symbiosis<sup>79</sup>. By contrast, *Streptomyces* treatment led to the  
641 downregulation of *Qrob\_P546940.2* in leaves, and the expression of a related gene,  
642 *StSWEET17c*, was suppressed in potato AM symbiosis<sup>79</sup>. Different expression patterns were  
643 observed for clade IV genes during mycorrhizal interactions with oak, suggesting that  
644 *SWEET17* genes are regulated in a complex manner in beneficial symbioses. Thus, the  
645 predicted expansion of clade IV *SWEET* sugar efflux carrier genes in the oak genome and the  
646 differential abundances of oak *SWEET* transcripts, may reflect the adaptation of oak to a  
647 remarkably rich spectrum of biotic interactions.

#### 648 3.5.4. **Thioredoxin, glutaredoxin and glutathione transferase**

649 Redox changes are major cellular disturbances that affect a range of processes throughout the  
650 organism's lifetime, through their involvement in various stages of development and in stress  
651 responses, in particular. Post-translational redox modifications of proteins are increasingly  
652 being recognized as a rapid, targeted mechanism for initiating cellular responses in a very  
653 short timeframe<sup>82</sup>. For example, light is known to control carbon metabolism enzymes  
654 through a cascade of electron exchange reactions, including dithiol-disulfide exchanges.

655 Within cells, these reactions are controlled by thioredoxins (TRX) and glutaredoxins (GRX),  
656 encoded by two multigenic families containing 20 to 40 genes and constituting the reducing  
657 systems<sup>83,84</sup>. Different isoforms are often present in different subcellular compartments,  
658 probably because they catalyze different reactions or have different protein partners. In  
659 addition to these regulatory functions, TRX and GRX are also required for the regeneration of  
660 some detoxification enzymes, particularly those requiring a reactive catalytic cysteine residue.  
661 This residue oxidized upon reaction with the substrate, as in peroxiredoxins and methionine  
662 sulfoxide reductases, must be recycled for the next turnover. We have also investigated the  
663 glutathione transferase (GST) family, the members of which have certain structural and  
664 biochemical features in common with GRXs. An analysis of the possible expansion of this  
665 gene family was also particularly enlightening, because its members are involved in  
666 secondary metabolism and in xenobiotic detoxification, and display transcriptional regulation  
667 in very diverse stress conditions. The TRX, GRX and GST gene content of *Q. robur* was thus  
668 analyzed at the level of defined subclasses, with comparisons with other photosynthetic  
669 organisms, including multiple tree species (*Populus trichocarpa*, *Prunus persica*, *Citrus*  
670 *clementina* and *Eucalyptus grandis*) (**Supplementary Table 35**). In most pairwise  
671 comparisons, the number of genes remained remarkably constant, indicating that these  
672 systems are essential for plants.

673 The genes of the GRX family displayed the greatest variation in number in plant-specific  
674 class III, with 9 to 24 genes in angiosperms, the oak genome having an average number of  
675 these genes (N=14), 50% of them being tandem-duplicated. Hence, variations in this class can  
676 be accounted for mostly by species-specific duplications. Similarly, the oak genome has a  
677 number of genes from the TRX/TRX reductase family similar to that in other organisms, and  
678 none of the subclasses are missing. The most striking characteristic is the presence of six  
679 genes for NADPH-TRX reductase a/b type (NTRa/b), rather than the one or two in other



680 species, with four of the genes in oak identified as tandem duplicate genes. In line with this  
681 observed expansion, the associated orthogroup (#2778) was found to be enriched in GO term  
682 (GO:0004791) analysis.

683 Fourteen classes of GST genes were identified in the last phylogenetic analysis performed  
684 with photosynthetic organisms<sup>85</sup>. Only 11 of these classes are present in angiosperms, the  
685 other three classes being found in *Physcomitrella patens*. The total number of genes (88) in  
686 oak is in the upper part of the range, as are those for *P. trichocarpa*, *E. grandis* and *S. bicolor*.  
687 A detailed subclass analysis revealed that the difference between oak and other organisms  
688 resulted principally from the presence of a larger number of GST Tau (GSTU) family  
689 members. This finding was confirmed by the orthoMCL analysis (see section 4.1.2), with an  
690 expansion observed for four clusters, including one with 19 GSTU genes (red branches in  
691 **Supplementary Fig. 48**). From this very variable gene content (there is no GSTU in *P.*  
692 *patens*, but 21 to 62 GSTU genes in the analyzed angiosperms) and the presented  
693 phylogenetic tree (many sequences cluster by species), it seems clear that GSTU genes  
694 evolved relatively recently and in a species-specific manner in plants. This situation differs  
695 from that for most GRX and TRX classes, for which photosynthetic organisms usually have  
696 the same number of each isoform (**Supplementary Table 35**)<sup>83,84</sup>. This difference is also  
697 highlighted by the 76.1% rate of tandem duplication for the GST family (mostly due to the  
698 largest classes, GSTF and GSTU), much higher than the 22.0% and 28.0% reported for the  
699 TRX/TRX reductase and GRX families, respectively, and the value obtained for the oak  
700 genome (35.6%).

### 701 3.5.5. MLO

702 Studies of the MLO (mildew locus O) family of disease resistance genes are particularly  
703 relevant in *Quercus*, the plant genus infected by the largest number of powdery mildew

704 species (16 from six different genera<sup>86</sup>). This large group of obligate plant pathogenic fungi  
705 infects almost 10,000 species of angiosperms<sup>87</sup>. The first MLO gene was isolated from  
706 barley<sup>88,89</sup>. It was found to act as a susceptibility gene, with recessive loss-of-function alleles  
707 (*mlo*) associated with broad-spectrum resistance (i.e. to all genotypes/races) to the fungal  
708 pathogen *Erysiphe graminis f. sp. hordei*, one of the causal agents of powdery mildew<sup>90</sup>.  
709 Unlike many of the resistance genes used in crop plants, which have been rapidly overcome  
710 by virulent races of pathogens after deployment, *mlo* resistance has remained durable in the  
711 field for decades, despite its widespread use. Mildew-resistant *mlo* mutants have also been  
712 described in *Arabidopsis thaliana*, tomato and pea<sup>91</sup>. The *Mlo* gene encodes a protein of  
713 unknown biochemical activity, with seven transmembrane domains, located at the plasma  
714 membrane. *Mlo* genes have been found into small families (often about 15 genes) in the  
715 genomes of many higher plant species, including *Prunus persica*<sup>92</sup>, *Vitis vinifera*, *Cucumis*  
716 *sativus*, and others<sup>93</sup>. Functional studies in *Arabidopsis* have shown that MLO function is not  
717 restricted to plant–powdery mildew interactions. Instead, these proteins are also involved in  
718 pollen perception<sup>94</sup> and root thigmotropism<sup>91</sup>.

719 We found 19 MLO genes in the haplome of *Q. robur* (**Supplementary Table 36,**  
720 **Supplementary Table 37, Supplementary Fig. 49**), including seven belonging to clade V.  
721 This clade contains the genes associated with powdery mildew susceptibility/resistance in  
722 *Arabidopsis thaliana*<sup>95</sup> and some other species. The large number of MLO genes in oak,  
723 particularly in clade V, is only surpassed by soybean, cotton and apple, all of which have  
724 undergone recent whole-genome duplication events. Most of the MLO genes are located on  
725 chromosomes #8 (5 genes, 4 of which belong to clade V), #10 (4 and 1) and #1 (3 and 2). We  
726 also found seven incomplete genes with strong homology to MLO. As MLO genes are  
727 susceptibility genes, these incomplete genes may confer resistance<sup>90</sup>. There are three  
728 incomplete genes on chromosome #10, at the 5' and 3' ends of a complete clade V *mlo* gene.

729 If we consider all complete and partial genes, the overall rate of tandem duplication of MLO  
730 genes is 46.2%, slightly higher than the overall rate for the oak genome (35.6%).

### 731 3.5.6. NB-LRR

732 NLR-parser (<sup>96</sup>, <https://github.com/steuernb/NLR-Parser>) was used to identify disease  
733 resistance genes encoding nucleotide-binding leucine-rich repeat proteins (NB-LRRs or  
734 NLRs) and related proteins from the oak genome (haplome). We identified an initial set of  
735 1,431 genes. Based on the orthoMCL analysis, 81 proteins from NB-LRR-related classes (i.e.  
736 orthogroup #1000, 1004, 1015, 1031, 1084, 1140, 1187, 1269, 1540, 1697, 2368, 2399, 4549,  
737 5011, 7397, 14497 and 15991, see **Supplementary Data Set 3 sheet #1**) were added to the  
738 set of putative disease resistance genes. The accuracy of domain prediction was checked with  
739 the NCBI Conserved Domains CD-search website (<sup>97</sup>, Batch CD-search version). Each protein  
740 was manually inspected and attributed to a given category based on the presence of the  
741 following canonical domains: Toll-interleukin receptor-like (TIR), NB and LRR. The non-  
742 TIR domains found in oak putative NLRs consisted of coiled-coil (CC) and resistance to  
743 powdery mildew protein (RPW8) domains, referred to as CNL and RNL, respectively.  
744 Finally, we also recorded any other domains (X) potentially representing integrated  
745 domains<sup>98,99</sup>. After curation and removal of mispredictions, we recovered a total of 1,091  
746 putative NB-LRR-related protein-encoding genes (**Supplementary Data Set 5**), 834 of which  
747 had a putative complete or partial NB domain and 54 showed a non-canonical and putative  
748 integrated domain. Many of these integrated domains, possibly acting as decoys for pathogen  
749 effectors<sup>100,101</sup>, are DNA-interacting domains such as zinc-finger or Myb/SANT family  
750 domains. Other notable integrated domains had signaling functions (e.g. WD40) or were  
751 previously reported in secreted proteins from animal parasites and pathogens, i.e. the  
752 Rhomboid protease family (Pfam PF1694).

753 Beyond the large number of single domains retrieved (i.e. 14 CC, 151 TIR, 1 RPW8, 61 NB  
754 and 85 LRR, **Supplementary Table 8**), the total complement of NB-LRR genes in the oak  
755 genome is remarkable by comparison to those of other species. The list LRR genes is  
756 probably incomplete, as this category is inherently very difficult to characterize due to the  
757 highly variable number of LRRs and the abundance of other LRR-related proteins (e.g. LRR-  
758 RLK or LRR-RLP), a group that is also expanded in the oak genome. If we exclude single  
759 domains, then, for the 1,091 genes, TIR-related NB-LRR proteins account for 43% of the  
760 remaining disease resistance genes (335 of 779 genes). This ratio of TIR- to non-TIR- NB-  
761 LRRs close to 1 indicates that the disease resistance gene content of the oak genome is more  
762 balanced than reported for other eudicots<sup>102–105</sup>. One group of non-TIR NB-LRRs, the  
763 expanded set of RNLs (orthogroup #1140) may also reflect the evolutionary history of  
764 pedunculate oak with the fungus *Erysiphe alphitoides*, responsible for oak powdery mildew.  
765 No disease resistance gene for this disease has been identified and cloned or described in oak  
766 trees, but this gene complement suggests considerable potential for resistance to these  
767 pathogens and represents a valuable source of genetic information.

768 We investigated the expansions detected in the oak genome by the orthoMCL/CAFE analysis  
769 in more detail, by retrieving protein sequences with an NB domain from classes that  
770 displaying marked expansion relative to other plant species. We focused in particular on  
771 orthogroup #1000 (labeled as #1 in **Fig. 3d and 4b**). Multiple alignments were constructed for  
772 selected proteins, with the hmalign program, from the HMMER 3.0 package<sup>106</sup>, and the  
773 Pfam NB-ARC domain (PF00931) seed alignment converted into a hidden Markov model  
774 profile by hmmbuild. Collected NB domains were manually inspected and truncated domains  
775 and obvious outliers were discarded. Orthogroup #1000 genes encoding TNL-related proteins  
776 accounted for 1,927 sequences from the 16 plant genomes used in the orthoMCL analysis,  
777 only 1,641 of which had an NB domain suitable for alignment. There were 308 oak genes in

778 the final set: 174 TNLs, 115 NLS, 16 TNs and 3 Ns. The *Homo sapiens* apoptotic protease-  
779 activating factor-1 (APAF-1) sequence, a commonly used outgroup for NB phylogenetic  
780 analysis, was added to orthogroup #1000 for tree rooting. A global alignment was obtained  
781 with Clustal-Omega in Seaview and conserved sites were selected manually with G-block  
782 implemented in Seaview<sup>107</sup>. The maximum likelihood tree was estimated in RAxML 7.7.2,  
783 with the standard algorithm, the PROTGAMMAIWAG model of sequence evolution and  
784 1,000 bootstrap replicates<sup>108</sup>. The phylogenetic tree was designed with FigTree v1.4.3  
785 (<http://tree.bio.ed.ac.uk>). The TNL-containing orthogroup #1000 (**Supplementary Fig. 6**)  
786 displayed two major specific expansions in oak that were well supported by bootstrap values.  
787 Within these two clades, several small physical clusters containing more than three  
788 contiguous genes were identified. These physical clusters were well supported by bootstrap  
789 values and consisted of numerous tandem duplicates (see **Supplementary Data Set 5** for  
790 details). With 75 genes in total, chromosome 9 was found to have the largest number of TNL  
791 clusters distributed along its length. Although based only on 85% of the genes of orthogroup  
792 #1000 showing a correct NB domain for alignment, the phylogenetic analysis highlights the  
793 obvious expansion of TNLs and related resistance proteins in woody species, shown in brown,  
794 relative to other selected plants, shown in green. Other notable large expanded clades  
795 corresponded to *E. grandis* and *M. domestica* (**Supplementary Fig. 6**).

### 796 3.5.7. RLK

797 Receptor-like kinases (RLKs) constitute one of the largest gene families in plants. The  
798 functions of most RLKs are unknown, but the functions described for members of this family  
799 include innate immunity, pathogen response, abiotic stress, development, and, in some cases,  
800 multiple functions. RLKs usually consist of three domains: an N-terminal extracellular  
801 domain, a transmembrane domain, and a C-terminal kinase domain (KD). Leucine-rich

802 repeat-receptor-like kinases (LRR-RLKs), which contain up to 30 leucine-rich repeat (LRRs)  
803 in their extracellular domain, constitute the largest RLK family.

804 We identified a genome-wide repertoire of oak RLKs containing a KD (PF00069.16), with the  
805 hmmsearch program<sup>109</sup>. The KDs of oak RLKs were then aligned with those of RLKs from  
806 *Arabidopsis thaliana* (623) and *Oryza sativa* (1,147), using MAFFT<sup>110</sup>. Alignments were  
807 cleaned with trimAl (gt 0.2,<sup>111</sup>) and used to build an approximate maximum-likelihood  
808 phylogenetic tree (Fastree 2.1.8,<sup>112</sup>). The quality of the alignments was systematically  
809 manually checked around all sites on which a positive selection footprint was detected. If the  
810 alignment was dubious (less than 4 sequences, presence of numerous gaps, or too divergent  
811 sequences), the site was not considered.

812 With *Arabidopsis* and rice genes as references, this tree was used to classify the oak RLKs  
813 into subfamilies, and into 20 subgroups (SG) for LRR-RLKs<sup>113</sup>. We identified 1,247 RLK  
814 genes, corresponding to 4.83% of the gene repertoire, *versus* only 2.28% in *Arabidopsis* and  
815 2.06% in rice (**Supplementary Data Set 6**). Two RLK subfamilies are clearly  
816 overrepresented in oak: SD1 (0.88% of the oak gene repertoire, *versus* 0.11% in *Arabidopsis*  
817 and 0.04% in rice) and LRR-RLK (1.69% of the oak gene repertoire, *versus* 0.83% in  
818 *Arabidopsis* and 0.67% in rice). A comparison with the LRR-RLK repertoire of 31 other  
819 angiosperm species<sup>113</sup> showed that two subgroups, SG-XIIa and SG-XIIb, displayed the  
820 highest overall expansion rates relative to the estimated number of genes in the angiosperm  
821 last common ancestor (102 copies in oak, expansion rate of 6.8 for SG-XIIa, and 50 copies in  
822 oak, expansion rate of 10 for SG-XIIb). As for NBS-LRR genes, a large proportion of LRR-  
823 RLK expansions were caused by tandem duplications: 72% and 79% for SG-XIIa and SG-  
824 XIIb, respectively. In addition, LRR-RLKs from SG-XIIa, most of which belonged to  
825 orthogroup #1006, displayed significant expansion in oak (labeled as #6 in **Fig. 3d**) and in  
826 trees more generally (labeled as #5 in **Fig. 4b**), whereas LRR-RLKs from SG-XIIb, mostly

827 from orthogroup #1003, displayed significant expansion only in trees (labeled as #3 **Fig 4b**).  
828 The few known genes in SG-XIIa include *FLS2* (FLAGELLIN-SENSITIVE 2) and *EFR* (EF-  
829 TU RECEPTOR) in Arabidopsis, and *Xa21* in rice. The SG-XIIb subgroup includes *XIK1*  
830 (Xoo-induced kinase 1). All these receptors are involved in the response to bacterial  
831 aggression.

832 The detection of a positive selection signature provides direct objective evidence of the  
833 adaptive role of lineage-specific duplications. We therefore investigated whether, and to what  
834 extent, the lineage-specific expanded LRR-RLKs and LRR-RLPs in oak harbored positive  
835 selection signatures in oak, as they do in other species<sup>113</sup>. Indeed, the detection of positive  
836 signature of selection is a direct and objective evidence of the adaptive role of lineage specific  
837 duplications. We used the orthoMCL families built from the same set of 16 species (15  
838 species plus oak). We realigned the proteins from three significantly expanded families of  
839 LRR-RLKs (orthoMCL orthogroups #1003, #1006 and #1016 in **Supplementary Data Set**  
840 **3**), and two of LRR-RLPs (#1009 and #1049 in **Supplementary Data Set 3**) using MAFFT<sup>110</sup>  
841 and trimAl (gt 0.2)<sup>111</sup>. Phylogenetic trees were built for each family (PhyML 3.0<sup>114</sup> and  
842 groups of oak ultraparalogs (*i.e.* sequences only related by duplication) were identified using a  
843 tree reconciliation approach (between the gene trees and species tree), as described by Fischer  
844 et al.<sup>113,115</sup>. For each group of ultraparalogs, sequences were aligned to preserve the coding  
845 phase (using Prank with the ‘codon’ option<sup>116</sup> and Guidance for cleaning<sup>117</sup>). We used the  
846 EggLib package<sup>118</sup> to infer the maximum likelihood phylogeny at the nucleotide level for  
847 every alignment, with PhyML 3.0<sup>114</sup>, under the GTR substitution model. We ran the codeml  
848 site model implemented in PAML 4 software<sup>119</sup> to infer positive selection on codons under  
849 several substitution models (for more details about the models used, see Fisher et al.<sup>113</sup>). The  
850 significance of positive selection was assessed in likelihood ratio tests (LRT). The sites at  
851 which positive selection was detected were checked manually and we identified the domain to

852 which they belong, including the specific residue of the LRR when required. In the five gene  
853 families identified as displaying significant expansion in oak, 24 groups of oak ultraparalog  
854 genes containing up to 28 sequences were identified. Nineteen of these groups had a  
855 significant strong signature of positive selection (11 corresponding to LRR-RLKs and 8 to  
856 LRR-RLPs, **Supplementary Data Set 9**). The 11 LRR-RLK groups of ultraparalogs  
857 belonged to four previously defined subgroups: SG-VIII-2 (1 group), SG-XI (1 group), SG-  
858 XIIa (5 groups) and SG-XIIb (4 groups). The two SG-XII subgroups were shown to have  
859 undergone species-specific expansion events in a study of 31 angiosperm genomes<sup>113</sup>. Most of  
860 the SG-XIIa genes described to date are involved in responses to biotic stresses. After manual  
861 curation, 260 sites were confirmed to be targets of positive selection (175 in LRR-RLK, and  
862 85 in LRR-RLP genes). We found that 78% (205) of the 260 sites were located in the LRR  
863 domain (150 in LRRs of LRR-RLK genes and 55 in LRR-RLP genes). An investigation of the  
864 precise location of the 150 sites within the LRR of LRR-RLK genes revealed that four amino  
865 acids in particular (6, 8, 10 and 11), were more frequently targeted by positive selection (121  
866 of the 150 sites, i.e. more than 80%, **Supplementary Fig. 8**). These variable amino acids lie  
867 in the unconserved part of the LXXLXLXX  $\beta$ -sheet/ $\beta$ -turn structure typical of LRRs that is  
868 involved in protein-protein interactions<sup>120,121</sup>. The residues targeted by positive selection were  
869 solvent-exposed<sup>122,123</sup>.

#### 870 3.5.8. Biosynthesis of hydrolysable tannins

871 Oak tissues have a very high hydrolyzable tannin (HTs) or gallotannin content, and have been  
872 one of the chief sources of HTs for leather tanning and dye manufacture for centuries. We  
873 studied the oak genome, to find potential clues to the ability of oak to synthesize HTs, which  
874 are esters of gallic acid with a polyol (typically  $\beta$ -D-glucose). Gallic acid is a derivative of the  
875 shikimate pathway generated by the dehydrogenation of a 5-dehydroshikimate  
876 intermediate<sup>124</sup>. The first committed step in HT biosynthesis is the formation of  $\beta$ -glucogallin



877 (1-O-galloyl- $\beta$ -D-glucose), which is generated by the esterification of gallic acid and glucose  
878 followed by transesterification to generate di-, tri-, tetra-, and pentagalloylglucose  
879 **Supplementary Fig. 50**). Ellagitannins and gallotannins are derived from pentagalloylglucose  
880 by the addition of further galloyl residues or oxidation<sup>125</sup>. The UDP-glucose:gallic acid  
881 glucosyltransferase UGT84A13 has recently been identified as a candidate enzyme in the  
882 biosynthesis of  $\beta$ -glucogallin in *Q. robur*<sup>126</sup>. However, the genes and enzymes involved in  
883 further esterification steps to generate di-, tri-, tetra-, and pentagalloylglucose remain  
884 unknown.

885 A first set of genes potentially involved in the biosynthesis of HTs was annotated on the basis  
886 of sequence similarities to genes involved in the chorismate pathway in *Arabidopsis*  
887 *thaliana*<sup>127</sup>. Uridine diphosphate (UDP) glycosyltransferases (UGTs) mediate the transfer of  
888 glycosyl residues from activated nucleotide sugars to acceptor molecules, and a superfamily  
889 of over 100 genes encoding UGTs has been identified in *A. thaliana*<sup>128</sup>. Based on the recent  
890 characterization of UGT84A13 in *Q. robur*<sup>126</sup>, we focused on the members of the neighboring  
891 UGT 74, 75, 83 and 84 families<sup>129</sup> ([http://www.p450.kvl.dk/At\\_ugts/family.shtml](http://www.p450.kvl.dk/At_ugts/family.shtml)). We  
892 identified 91 genes potentially associated with HT biosynthesis in the oak genome and we  
893 performed phylogenetic analyses of the relationships between these genes and their  
894 *Arabidopsis* orthologs from the chorismate pathway (**Supplementary Fig. 51a**) and from the  
895 UGT 74, 75, 83 and 84 families (**Supplementary Fig. 51b**). We detected significant  
896 expansion of the UGT 74, 75 and 83 families in the oak genome, and most of the duplications  
897 appeared to be in tandem arrays. Thus, tandem duplications seem to have driven the  
898 expansion of these UGT families. Conversely, neither the genes of the UGT84 family nor  
899 those involved in the chorismate pathway were expanded in the oak genome.

### 900 3.5.9. Laccases

901 The so-called “laccases” (EC 1.10.3.2) are a particularly disparate group of multicopper  
902 oxidases (MCOs) in plants, also known as laccase-like multicopper oxidases or simply  
903 laccase-like proteins<sup>130</sup>. Laccases can oxidize multiple substrates, whereas other enzymes  
904 from the MCO family, such as ascorbate oxidases (EC 1.10.3.3), oxidize only specific  
905 substrates. Ascorbate oxidases and laccases are structurally related but different MCOs<sup>131</sup>, and  
906 ascorbate oxidases are often used as an outgroup in phylogenetic analyses of plant laccases.

907 Little is known about the functions of plant laccases. They can polymerize various phenolic  
908 compounds to form insoluble polymers with possible roles in wound healing, plant defense,  
909 lignification and the oxidation of seed coat tannins<sup>132</sup>. Three *Arabidopsis* laccases (AtLAC4,  
910 11 and 17) were recently shown to play a role in lignin polymerization, and one (AtLAC15)  
911 was implicated in the polymerization of flavonoids in the *Arabidopsis* seed coat<sup>133,134</sup>. These  
912 results suggest, at least for lignin polymerization, that laccases are functionally redundant,  
913 with multiple mutations required to have a significant effect. In *Arabidopsis* and poplar, the  
914 laccases involved in lignification are targets of miR397a<sup>132</sup>. This micro-RNA downregulates  
915 laccases and transgenic poplars displaying miR397 overexpression have been produced.  
916 These trees displayed low levels of expression for 17 laccases and decrease of up to 40% in  
917 the laccase activity of the stem xylem<sup>135</sup>.

918 We found 27 laccase genes in the haplome of *Q. robur* and performed a comparative  
919 phylogenetic analysis of the laccase protein sequences from *Q. robur*, *P. trichocarpa*, *E.*  
920 *grandis*, *V. vinifera*, *A. thaliana* and *O. sativa* (**Supplementary Fig. 52**). Sequences were  
921 retrieved from Phytozome (<https://phytozome.jgi.doe.gov>) and the Rice Genome Annotation  
922 Project ([http://rice.plantbiology.msu.edu/cgi-bin/putative\\_function\\_search.pl](http://rice.plantbiology.msu.edu/cgi-bin/putative_function_search.pl)) by BLAST-p  
923 searches. Protein name aliases were used in place of gene model names for *A. thaliana*<sup>133</sup> and  
924 *P. trichocarpa* (**Supplementary Table 38**). On the phylogenetic tree, *Q. robur* sequences

925 were distributed across the seven phylogenetic groups already described in *Arabidopsis*.  
926 **Supplementary Table 39** shows the number of laccases within each phylogenetic group for  
927 *Arabidopsis*, poplar and pedunculate oak. Pedunculate oak was found to have about twice as  
928 many laccase genes as *Arabidopsis*, and about half as many as poplar. Our results therefore  
929 suggest that the laccase gene family has undergone expansion in oak, but to a lesser extent  
930 than in poplar that however shows a recent whole-genome duplication. Groups #2 and #6  
931 displayed a clear expansion of the laccase gene family in tree species relative to *Arabidopsis*,  
932 with group #6 displaying stronger expansion in oak. Group #2 corresponds to laccase  
933 homologs of ATLAC4, 11 and 17, essential for lignification in *Arabidopsis*. This biological  
934 function is of primary importance for wood cell lignification in trees, so the patterns of  
935 duplication and functionalization may differ between trees and herbaceous plants. Group #6  
936 contains seven laccases, including AtLAC14.

### 937 **3.6. Non-coding RNA prediction and annotation**

938 The prediction of long non-coding RNAs was based on 13 RNAseq libraries (listed in  
939 **Supplementary Table 13**). Paired fastq files for the different libraries were aligned with the  
940 reference genome fasta file with STAR (version STAR\_2.4.0i)<sup>136</sup>. The 13 libraries included  
941 29 million to 72 million sequence pairs and originated from different tissues and conditions:  
942 six from buds, four from roots, one from xylem, one from leaf and one from callus tissues.  
943 PCR duplicates were pruned from alignment files (SAMtools rmdup, Version: 1.1)<sup>137</sup>, which  
944 were then merged (SAMtools merge, Version: 1.1) before new transcript and gene calling  
945 (Stringtie v1.0.1)<sup>138</sup>. The unique alignment rate for read-pairs exceeded 82 %. The Stringtie  
946 model included 158,714 genes and 215,270 transcripts. The resulting GTF file was processed  
947 with FEELnc (<https://github.com/tderrien/FEELnc>, Version 26/05/2015) to remove known  
948 genes and transcripts and to calculate the coding potential of the remaining sequences. The  
949 predicted lncRNAs were classified with FEELnc\_classifier.pl. FEELnc predicted 16,017

950 genes and 27,147 transcripts not overlapping with the existing haplome gene model and with  
951 more than one exon. Using the FEELnc coding potential program, we identified 12,327 long  
952 non-coding RNA genes (corresponding to 19,712 transcripts) and 4,312 new protein-coding  
953 genes (corresponding to 7,299 transcripts). FEELnc classified one third of the long non-  
954 coding RNA candidates as sense and two thirds as antisense, one third as genic and two thirds  
955 as intergenic. A track called 'lncRNA' was added to the genome browser with the FEELnc  
956 candidate\_feelnc\_lncRNA.gtf.lncRNA.gtf file.

957 Other non-coding RNA genes were predicted and annotated with 12 paired RNAseq datasets  
958 (listed in **Supplementary Table 14**). In total, 28,001 loci corresponding to ncRNAs were  
959 predicted and annotated with tRNAscan-SE<sup>139</sup>, RNAmmer<sup>140</sup>, cmsearch<sup>141</sup> with RFAM  
960 covariance models<sup>142</sup> and sRNA-PIAn (**Supplementary Table 15**). Transfer RNA (tRNA)  
961 and ribosomal RNA (rRNA) genes were predicted with tRNAscan-SE and RNAmmer,  
962 respectively. The tRNAscan-SE software predicted 827 tRNAs, including 757 tRNAs  
963 decoding standard amino acids, 57 pseudogenes, 12 tRNAs of unknown isotypes and one  
964 possible suppressor tRNA. RNAmmer software found 82 rRNA loci, including 13 large  
965 subunit (LSU) rRNA genes, 20 small subunit (SSU) rRNA genes and 49 rRNA 5S genes. We  
966 used the cmsearch program from the Infernal suite with a selection of covariance models  
967 relating to families found in eukaryotic genomes, including tRNAs, rRNAs, small nucleolar  
968 RNAs (snoRNAs), small nuclear RNAs (snRNAs), miRNAs, SRP RNAs, RnaseMRP RNAs,  
969 telomerase RNAs and Vault RNAs. The Infernal cmsearch program found no LSU, but  
970 predicted 14 rRNA 5.8S loci, 52 SSU rRNA loci, and 65 rRNA 5S loci. Thus, considering all  
971 rRNA predictions, 136 loci in total were predicted and annotated as ribosomal RNA,  
972 including 70 rRNA 5S and 61 LSU and/or SSU rRNAs. In total, 44 predicted rRNA 5 S genes  
973 were common to the cmsearch and RNAmmer analyses. Seven of the 13 LSU loci predicted  
974 by RNAmmer overlapped the 5.8S rRNA predictions calculated by cmsearch. The Infernal

975 cmsearch program predicted 815 tRNAs. In total, 852 tRNAs were predicted, 790 of which  
976 were detected by both tRNAscan-SE and Infernal cmsearch; 25 were specific to Infernal  
977 cmsearch and 37 were specific to tRNAscan-SE. Among the other ncRNA genes, a total of  
978 412 C/D box and 74 H/ACA box snoRNA genes were predicted, corresponding to 73 and 17  
979 different families of snoRNA, respectively. With 146 predicted candidates, the C/D box  
980 snoRNA71 family was the most heavily represented. An analysis of snoRNA gene  
981 organization showed that 190 of these genes were organized into 59 clusters containing two to  
982 11 snoRNA genes. Other snoRNA genes were also identified by eye in the clusters  
983 (**Supplementary Fig. 14**, sequence of a snoRNA H/ACA gene conserved in *A. thaliana*). The  
984 cmsearch program also predicted 263 pre-miRNA loci, two RNase MRP RNA genes, 31 SRP  
985 RNA genes, 225 spliceosomal snRNA genes including 34 U1 snRNA genes, one U11 snRNA  
986 gene, 55 U2 snRNA genes, one U12 snRNA gene, 33 U4 snRNA genes, 24 U5 snRNA genes,  
987 64 U6 snRNA genes and 13 U6atac snRNA genes. We retained only one of the pre-miRNA  
988 predictions made on both strands at same positions, resulting in the consideration of 204 pre-  
989 miRNA loci in the set of pre-miRNA gene predictions. We also predicted miRNA genes with  
990 sRNA-PIAn (source code available as a workflow at [https://forgemia.inra.fr/genotoul-](https://forgemia.inra.fr/genotoul-bioinfo/ngspipelines/tree/master/workflows/srnaseq)  
991 [bioinfo/ngspipelines/tree/master/workflows/srnaseq](https://forgemia.inra.fr/genotoul-bioinfo/ngspipelines/tree/master/workflows/srnaseq)) on the 12 paired small RNAseq  
992 datasets. sRNA-PIAn implements a model of miRNA biogenesis. Loci are built by  
993 considering the regions of the genome to which reads produced by sRNA-seq experiments  
994 map. Candidate loci are subjected to the miRNA prediction procedure, which considers the  
995 expected pre-miRNA stem-loop structure, the size of the pre-miRNA sequence, the size of  
996 pre-miRNA loops (bulges, internal loops, stem loop), the size of the most represented  
997 sequence (20-24 nt), the alignment of this most represented sequence with the stem of the pre-  
998 miRNA and the expected expression profile of the pre-miRNA. A score is assigned to each  
999 predicted pre-miRNA locus, taking into account the characteristics described above. Each

1000 predicted pre-miRNA locus is then subjected to an annotation procedure in which it is aligned  
1001 with miRBase<sup>143</sup> and RFAM<sup>142</sup> sequences with BLAST+<sup>144</sup>, to differentiate between known  
1002 ncRNA families and new candidate miRNA families. In total, 26,109 miRNA loci were  
1003 predicted by sRNA-PIAn, from which 1,508 mature miRNA loci predicted by sRNA-PIAn  
1004 with a high score were annotated as miRNAs on the basis of strong similarities (one error  
1005 allowed) to sequences in the miRBase or RFAM databases (fasta files). We found that 145 of  
1006 the related pre-miRNAs were specific to the RFAM cmsearch program and that 64 of these  
1007 pre-miRNAs encoded members of the mir-69 gene family. Interestingly, 59 of the pre-  
1008 miRNA loci predicted by cmsearch contained one or both of the mature miRNAs predicted  
1009 and annotated with sRNA-PIAn. Different tracks relating to ncRNA predictions/annotations  
1010 were added to the genome browser, according to the software used.

1011 Finally, the 12 paired small RNAseq datasets as well as ncRNA predictions, lncRNA genes  
1012 and TEs were used to assign expression evidence to the whole set of predicted noncoding  
1013 regions. Reads obtained from small RNAseq datasets were mapped onto the genome with  
1014 Bowtie2<sup>145</sup>, using default parameters and retaining only one alignment. Transcription  
1015 evidence and count data were obtained with Featurecounts for each predicted non-coding  
1016 RNA locus<sup>146</sup>. Predicted lncRNAs were used to confirm expression at predicted non-coding  
1017 loci and to identify clusters of shorter ncRNA genes. SAMtools<sup>137</sup> and BEDtools<sup>147</sup> functions  
1018 were used to manipulate alignments and to identify regions of overlap between the predicted  
1019 lncRNA and ncRNA genes. We found that 212 of the predicted lncRNA genes overlapped  
1020 annotated ncRNA loci (strand not considered). Fourteen overlapped 14 rRNA predictions,  
1021 three overlapped six SRP RNA predictions, with two lncRNAs containing two and three SRP  
1022 RNA predictions, respectively; 114 overlapped 124 mature miRNA or pre-miRNA  
1023 predictions, with six lncRNAs overlapping two or more pre-miRNA predictions; 34  
1024 overlapped 82 snoRNA, with 19 of lncRNAs overlapping two to 11 snoRNA predictions; 22

1025 overlapped 22 tRNA loci; seven overlapped 10 U6 snRNA predictions, with one lncRNA  
1026 overlapping four U6 snRNA predictions; one overlapped one U6atac snRNA prediction; three  
1027 overlapped three U1 snRNA predictions; six overlapped 13 U2 snRNA predictions, with five  
1028 lncRNAs overlapping two to five U2 snRNA predictions; five overlapped six U4 snRNA  
1029 predictions, with one lncRNA overlapping two U4 snRNA predictions. The content of small  
1030 RNAseq datasets was analyzed for non-coding elements, such as predicted lncRNAs, other  
1031 predicted/annotated ncRNAs and predicted TEs (**Supplementary Table 16**). Bowtie2 aligned  
1032 83.34% of the 383,274,162 reads on scaffolds. Using Featurecounts with non-coding  
1033 elements, such as TEs, lncRNA and ncRNA annotations and predictions, we were able to  
1034 assign a total of 231,211,802 reads, corresponding to 72.4 % of the mapped reads, to  
1035 annotated non-coding elements.

1036

## 1037 **4. Mutational landscape**

### 1038 **4.1. Estimate of genetic diversity and $\pi_0/\pi_4$ ratio**

1039 The genetic diversity of oak ( $\pi$ ) was 0.011 at synonymous sites ( $\pi_4$ ), and 0.005 at non-  
1040 synonymous sites ( $\pi_0$ ), with a mean  $\pi_0/\pi_4$  ratio of 0.44 (**Supplementary Table 9**). For 1,176  
1041 manually curated genes, we recovered the  $\pi_0/\pi_4$  ratio equals to 0.43 ( $\pi_0 = 0.00429$  and  $\pi_4 =$   
1042  $0.00990$ ). Oak has a higher genetic diversity and  $\pi_0/\pi_4$  ratio (**Fig. 2a**) than the other woody  
1043 perennial species studied by Chen et al.<sup>148</sup>. Further comparisons between “Expanded”,  
1044 “Contracted”, and “Unchanged” gene families showed that  $\pi_0$  estimates were significantly  
1045 higher for expanded gene families in oak ( $0.007$ ,  $p\text{-value} < 2 \times 10^{-16}$ ) whereas  $\pi_4$  values were  
1046 similar for all types of gene families ( $0.012$ , **Supplementary Fig. 54**), resulting in a higher  
1047  $\pi_0/\pi_4$  ratio ( $0.56$ ). Contracted family genes had a significantly lower  $\pi_0/\pi_4$  ratio ( $0.30$ ) than  
1048 unchanged families ( $0.32$ ,  $p\text{-value} = 5.2 \times 10^{-3}$ ). TDGs also had a higher  $\pi_0/\pi_4$  ratio ( $0.53$ ), and

1049 an even higher  $\pi_0/\pi_4$  was found in the families expanded in oak (0.62). Similar estimates were  
1050 obtained from the analysis of the pool-seq dataset, i.e. average  $\pi_0/\pi_4$  of 0.50 ( $\pi_0 = 0.00538$   
1051 and  $\pi_4 = 0.0108$ ), increasing to 0.59 for TDG, and 0.60 for expanded, 0.30 for contracted and  
1052 0.32 for unchanged genes. Higher  $\pi_0/\pi_4$  values suggest a potential accumulation of deleterious  
1053 mutations in expanded gene families relative to contracted or unchanged families. We  
1054 calculated the frequency of mutations (as unnormalized pairwise differences) likely to cause  
1055 protein malfunction (e.g. premature stop codons, start/stop codon changes). Genes from  
1056 expanded families displayed significantly more potentially deleterious mutations (mean  
1057  $=0.23$ ,  $p\text{-value} < 2 \times 10^{-16}$ ) than those from contracted (0.09) or unchanged families (0.06).

#### 1058 **4.2. Detection of somatic mutations**

1059 We compared the three libraries L1, L2 and L3 (i.e. 6 pairwise combinations, **Supplementary**  
1060 **Table 20**) and detected 61 reliable somatic mutations. A total of 46 somatic mutations were  
1061 completely absent from the poolseq dataset (40 SNPs), or and had MAFs below 0.5% (6  
1062 SNPs), *i.e.* below the minimum threshold used to exclude sequencing errors in the poolseq  
1063 dataset). Considering our high sequencing depth and the number of individual pooled (20  
1064 genotypes), each allele is expected to be near 2.5%. As a consequence, low allele frequency  
1065 variants are expected to be related to sequencing errors (estimated at 2.4%, see  
1066 **Supplementary Figure 25**). Thus, to be conservative, we filtered out all candidate somatic  
1067 mutations with an allele frequency above 0.005. As a result, 75% of the somatic mutations  
1068 (46/61) could be considered to be detected exclusively in the “3P” accession (**Supplementary**  
1069 **Table 5**).

1070 Noteworthy, one of the 40 somatic mutations detected exclusively in “3P” was found in a  
1071 gene coding sequence: Sc0000066\_1207928 in Qrob\_T0204900.2 corresponded to a member  
1072 of the large cytochrome P450 superfamily encoding a protein of the CYP4/CYP19/CYP26



1073 subfamilies with annotations relating to secondary metabolite biosynthesis, transport and  
1074 catabolism, lipid transport and metabolism. This mutation was synonymous (ACC->ACT,  
1075 corresponding to a threonine residue in the protein).

## 1076 **5. Comparative and evolutionary genomics**

### 1077 **5.1. Macroevolutionary analysis**

#### 1078 **5.1.1. Oak karyotype evolution and genome organization**

1079 Considering grape to be the closest modern representative of the n=21 rosid ancestor (derived  
1080 from a post- $\gamma$  ancestor with 7 protochromosomes (shown in color on the y-axis of the dotplots  
1081 of **Supplementary Fig. 16**) the comparisons between grape-eucalyptus and grape-watermelon  
1082 shows a clear 1:2 relationships, while that between grape-coco, grape-peach and grape-oak  
1083 genomes shows a clear a 1:1 relationships see dotplot diagonals in each chart, shown with  
1084 green circles in **Supplementary Fig. 16**.

#### 1085 **5.1.2. Gene family expansion/contraction in oak**

1086 For the total of 541,339 gene models across the 15 species (**Supplementary Table 21**,  
1087 **Supplementary Fig. 17**) plus *Q. robur*, 435,095 were classified into 36,844 orthogroups  
1088 (gene families) (**Supplementary Data Set 3 sheet #1**), with 106,444 genes remaining  
1089 singletons after clustering (**Supplementary Table 7**). In total, 4860 orthogroups were  
1090 common to all species. For the 25,808 oak proteins, 22,498 clustered into 11,813 orthogroups,  
1091 479 of which were oak-specific and contained 1,737 oak proteins. There were also 3,310  
1092 singleton proteins for oak. From the 36,844 orthogroups 524 and 72 were found to be  
1093 expanded and contracted in oak, respectively (**Supplementary Data Set 3 sheet #2 and #4**).  
1094 A total of 154 orthogroups were specific to oak (**Supplementary Fig. 18**), whereas 65 were  
1095 common to all species (**Supplementary Fig. 18**). We found that 73% of the genes within

1096 expanded orthogroups were tandemly duplicated genes (TDGs), this percentage increasing to  
1097 99% if we also included long distance-duplicated genes (LDGs), whereas the 72 contracted  
1098 orthogroups contained only 47% TDGs (**Supplementary Fig. 19**).

## 1099 **5.2. Identification of tandemly duplicated genes in oak**

1100 Speciation and duplication events in the pedunculate oak genome were identified using the  $K_s$   
1101 distribution of orthologous gene pairs between oak and peach (green bars in **Supplementary**  
1102 **Fig. 20**) and paralogs in oak (purple bars in **Supplementary Fig. 20**), respectively. The  
1103 oak/peach ortholog  $K_s$  distribution defines the position of the speciation event between these  
1104 two species, with a single ancestral triplication event ( $\gamma$ ) common to grape, peach, cocoa and  
1105 oak and predating the speciation event. The burst of tandem duplicates highlighted by the  
1106 purple  $K_s$  peak occurred after oak/peach speciation and appears to be an oak-specific event.  
1107 The dot plot representation of tandemly duplicated genes (TDGs) in oak is depicted in  
1108 **Supplementary Fig. 21**. We identified 9,189 TDG (**Supplementary Data Set 4**) using the  
1109 threshold and methodology presented in the method section. They were validated based on (i)  
1110 the comparison with polymorphism of allelic gene pairs (**Supplementary Fig. 22**) and (ii)  
1111 sequence coverage analysis (**Supplementary Fig. 23**). Besides, we identified 8,797 genes as  
1112 long distance duplicated genes (LDGs) and 7,822 genes as single genes (SGs)  
1113 (**Supplementary Data Set 4**).

## 1114 **5.3. Challenges in the identification of genes related to tree habit**

1115 The increasingly rapid rate at which full genome sequences are being published opens up  
1116 exciting possibilities, but the 16 species for which suitable genome sequences were available  
1117 for this study represents only a small proportion of the worldwide diversity of plants (there are  
1118 currently ~350,000 accepted angiosperm species (<http://www.theplantlist.org/>). It was  
1119 recently estimated that almost 50% of vascular plants, most of which are angiosperms, are

1120 woody<sup>149</sup>. There are probably, therefore, many genomic changes associated with shifts in  
1121 growth form not captured in our analyses. Given the modest number of genomes included in  
1122 this study, it remains unclear whether the patterns highlighted here can be generalized to  
1123 larger numbers of species and clades. It is also unclear whether the same sets of expanding  
1124 and contracting gene families would be identified in all evolutionary transitions from  
1125 herbaceous to woody forms. Fortunately, even with the limited number of genomes available,  
1126 it is possible to identify the branch points within the phylogeny at which additional targeted  
1127 sequencing would help to provide an answer to this question. The most dynamic aspects of  
1128 growth form shifts within the angiosperm phylogeny have occurred within the eudicots, a  
1129 group consisting largely of rosids and asterids<sup>149–152</sup>. The sequencing of genomes for  
1130 additional tree species in this part of the phylogeny would be particularly informative.  
1131 Fitzjohn et al.<sup>149</sup> used the distribution of growth forms from Zanne et al.<sup>152</sup> to estimate the  
1132 proportion of woody taxa across vascular plants at the genus, family and order levels. The  
1133 clades highlighted by Fitzjohn et al.<sup>149</sup> as both variable in growth form (defined here as clades  
1134 with 30-70% of species considered to be woody according to the strong prior) and diverse  
1135 (defined here as containing  $\geq 10$  species), comprise 470 genera, 41 families and 12 orders.  
1136 Paired comparisons of close relatives in these clades, ideally genera with both woody and  
1137 herbaceous members, would make it possible to determine whether gene expansions in R-  
1138 gene families are correlated with evolutionary shifts in growth form. It is clear that certain  
1139 clades are extraordinarily variable in terms of growth habit, but it seems unlikely that growth  
1140 habit *per se* drives expansions and contractions in R-gene families. Instead, with their longer  
1141 lifespans, woody species probably accumulate a greater pathogen load than herbaceous taxa.  
1142 It would therefore appear reasonable to consider longevity as a driver of these functional gene  
1143 shifts, and growth habit as a correlate of such differences in life history.

1144 We examined the full genome sequences currently or soon to be available for eudicots (as  
1145 reported in ([https://genomeevolution.org/wiki/index.php/Sequenced\\_plant\\_genomes](https://genomeevolution.org/wiki/index.php/Sequenced_plant_genomes)) as of 18  
1146 December 2016), to identify future targets building on existing genomic resources. We had  
1147 access to genome sequences for 46 herbaceous and 27 woody species from 18 orders  
1148 (**Supplementary Table 40 and Supplementary Fig. 55**), 14 of which display growth habit  
1149 variation (defined here as clades with 30-70% of woody species according to the strong prior)  
1150 and sufficient diversity (defined here as  $\geq 10$  species), according to Fitzjohn et al.<sup>149</sup>. The  
1151 sequencing of herbaceous species from four variable genera (*Nicotiana*, *Linum*, *Genlisea*,  
1152 *Solanum*) is underway, but full genome sequences for both a woody and a herbaceous species  
1153 from the same genus have yet to be published. In Fabaceae, complete genome sequences have  
1154 been released for herbaceous species from eight genera and for one woody species from the  
1155 genus *Cajanus*. Rosaceae also includes four woody and one herbaceous species (*Fragaria*) for  
1156 which complete genome sequences have been released. Three variable orders have fully  
1157 sequenced herbaceous species (Ranunculales, Caryophyllales, Solanales). In addition,  
1158 Lamiales has three herbaceous and one woody (*Fraxinus*) species for which full genome  
1159 sequences have been obtained, and Fabales has eight herbaceous and one woody (*Cajanus*)  
1160 species with full genome sequences. Additional genome sequences for species from any of  
1161 these clades (ideally within genera), considered together with the oak genome sequence,  
1162 would improve our understanding of the evolution of genomic features favoring a long  
1163 lifespan and woodiness in plants.

## 1164 **5.4. Gene ontology (GO) enrichment analysis**

### 1165 **5.4.1. GO term enrichment in three categories of genes**

1166 We assigned a total of 3,433 GO terms (**Supplementary Table 41**): 1,179 for molecular  
1167 function (MF), 1,867 for biological process (BP) and 387 for cellular component (CC). At

1168 least one GO term was assigned to 16,820 of the 25,808 oak gene models (65.2%). The mean  
1169 number of GO terms per gene was 3.73 (ranging from 1 to 18) (**Supplementary Fig. 56**) and  
1170 gene counts per GO term are provided in **Supplementary Fig. 57**. We found that 332 GO  
1171 terms were associated with only one gene.

1172 GO term enrichment was compared between three categories of genes: (i) TDGs (i.e. genes  
1173 located in close proximity, see section 4.2 for the method), (ii) LDGs and (iii) SGs. The  
1174 number of significant GO terms ( $p$ -value  $< 0.05$ ) was 97 for TDGs, 144 for LDGs and 240 for  
1175 SGs (**Supplementary Table 41**).

1176 For TDGs (**Supplementary Data Set 8 sheet #1**), the best supported GO terms (in terms of  
1177  $p$ -value and fold-enrichment) highlighted gene products involved in ‘protein phosphorylation’  
1178 (GO:0006468,  $P < 1 \times 10^{-30}$ ), ‘signal transduction’ (GO:0007165,  $P < 1 \times 10^{-30}$ ), ‘recognition of  
1179 pollen’ (GO:0048544,  $P < 1 \times 10^{-30}$ ), ‘oxidation-reduction process’ (GO:0055114,  $P = 7.2 \times 10^{-29}$ ),  
1180 ‘metabolic process’ (GO:0008152,  $P = 2.2 \times 10^{-17}$ ), ‘chitin catabolic process’ (GO:0006032,  
1181  $P = 1.9 \times 10^{-13}$ ), ‘response to biotic stimulus’ (GO:0009607,  $P = 4 \times 10^{-12}$ ), ‘cell wall  
1182 macromolecule catabolic process’ (GO:0016998,  $P = 2.3 \times 10^{-10}$ ), ‘response to oxidative stress’  
1183 (GO:0006979,  $10^{-8}$ ), ‘drug transmembrane transport’ (GO:0006855,  $P = 1.9 \times 10^{-7}$ ) and ‘defense  
1184 response’ (GO:0006952,  $P = 9 \times 10^{-7}$ ). Thus, gene products executing activities related to ‘ADP  
1185 binding’ (GO:0043531,  $P < 1 \times 10^{-30}$ ), ‘transferase activity’ (GO:0016758,  $P = 3.8 \times 10^{-28}$ ), ‘heme  
1186 binding’ (GO:0020037,  $P = 1.3 \times 10^{-27}$ ), ‘protein kinase activity’ (GO:0004672,  $P = 1.2 \times 10^{-26}$ ),  
1187 ‘oxidoreductase activity’ (GO:0016705,  $P = 5.8 \times 10^{-23}$ ), iron ion binding (‘GO:0005506’,  
1188  $P = 1.1 \times 10^{-17}$ ), ‘chitinase activity’ (GO:0004568,  $P = 2.1 \times 10^{-13}$ ), ‘protein serine/threonine  
1189 kinase activity’ (GO:0004674,  $P = 2.4 \times 10^{-13}$ ), and ‘nutrient reservoir activity’ (GO:0045735,  
1190  $P = 1.3 \times 10^{-10}$ ) were the most frequently detected. Membrane-bound (LRR-RLKs and LRR-  
1191 RLPs) and cytosolic (NB LRR) receptors, together with UDP-glycosyltransferase,

1192 cytochrome P450, chitinase, peroxidase, and psathogenesis-related protein were among the  
1193 most frequently detected proteins corresponding to the BP and MF ontologies.

1194 By contrast, a very different molecular signature was obtained for LDGs (**Supplementary**  
1195 **Data Set 8 sheet #2**). The best supported GO terms included ‘regulation of transcription,  
1196 DNA-templated’ (GO:0006355,  $P=1.20\times 10^{-10}$ ), ‘protein dephosphorylation’ (GO:0006470,  
1197  $P=3.50\times 10^{-9}$ ), ‘small GTPase-mediated signal transduction’ (GO:0007264,  $P=1.30\times 10^{-8}$ ),  
1198 ‘microtubule-based process’ (GO:0007017,  $P=2.60\times 10^{-8}$ ), ‘translation’ (GO:0006412,  
1199  $P=1.30\times 10^{-7}$ ), ‘response to heat’ (GO:0009408,  $P=3.50\times 10^{-7}$ ), ‘protein folding’  
1200 (GO:0006457,  $P=1.70\times 10^{-6}$ ), ‘fatty acid biosynthetic process’ (GO:0006633,  $P=2.20\times 10^{-6}$   
1201 ‘biosynthetic process’ (GO:0009058,  $P=3.60\times 10^{-5}$  and ‘protein polymerization’  
1202 (GO:0051258,  $P=6.90\times 10^{-5}$ ). Thus, gene products with activities relating to ‘protein  
1203 serine/threonine phosphatase activity’ (GO:0004722,  $P=3.70\times 10^{-13}$ ), ‘DNA binding’  
1204 (GO:0003677,  $P=1.70\times 10^{-12}$  ‘sequence-specific DNA binding’ GO:0043565,  $P=1.90\times 10^{-11}$ ),  
1205 ‘GTP binding’ (GO:0005525,  $P=9.30\times 10^{-11}$ ), ‘structural constituent of ribosome’  
1206 (GO:0003735,  $P=2.60\times 10^{-9}$ ), ‘transcription factor activity, sequence-specific DNA binding’  
1207 (GO:0003700,  $P=5.90\times 10^{-9}$ ), ‘NADH dehydrogenase (ubiquinone) activity’ (GO:0008137,  
1208  $P=1.30\times 10^{-8}$ ), ‘GTPase activity’ (GO:0003924,  $P=2.40\times 10^{-8}$ ), ‘structural constituent of  
1209 cytoskeleton’ (GO:0005200,  $P=8.40\times 10^{-7}$ ), and ‘microtubule binding’ (GO:0008017,  
1210  $P=2.80\times 10^{-6}$ ) were the most frequently detected. Protein phosphatases, proteins with DNA-  
1211 binding and homeobox domains, transcription factors, elongation factors, ribosomal proteins,  
1212 microtubule-associated proteins, and DNA gyrases were among the most widespread proteins  
1213 corresponding to the BP and MF ontologies.

1214 For SGs (**Supplementary Data Set 8 sheet #3**), the best supported GO terms concerned  
1215 ‘DNA replication’ (GO:0006260,  $P=5\times 10^{-13}$ ), ‘transcription, DNA-templated’ (GO:0006351,  
1216  $P=8.6\times 10^{-13}$ ), ‘DNA repair’ (GO:0006281,  $P=1.1\times 10^{-11}$ ), ‘RNA processing’ (GO:0006396,

1217  $P=1.2\times 10^{-9}$ ), 'photosynthesis' (GO:0015979,  $P=1.2\times 10^{-9}$ ), 'pseudouridine synthesis'  
1218 (GO:0001522,  $P=1.5\times 10^{-9}$ ), 'DNA recombination' (GO:0006310,  $P=3.9\times 10^{-9}$ ), 'protein  
1219 ubiquitination' (GO:0016567,  $P=9.8\times 10^{-7}$ ), 'glycerol ether metabolic process' (GO:0006662,  
1220  $P=1.3\times 10^{-6}$ ) and 'translation' (GO:0006412,  $P=3.4\times 10^{-6}$ ). Thus, gene products with activities  
1221 relating to 'binding' (GO:0005488,  $P=4.7\times 10^{-24}$ ), 'RNA binding' (GO:0003723,  $P=6.2\times 10^{-$   
1222  $20$ ), 'nucleic acid binding' (GO:0003676,  $P=2.4\times 10^{-19}$ ), 'zinc ion binding' (GO:0008270,  
1223  $P=6.9\times 10^{-16}$ ), 'metal ion binding' (GO:0046872,  $P=4.8\times 10^{-10}$ ), 'pseudouridine synthase  
1224 activity' (GO:0009982,  $P=1.5\times 10^{-8}$ ), 'DNA-directed RNA polymerase activity' (GO:0003899,  
1225  $P=1.9\times 10^{-8}$ ), 'nucleotide binding' (GO:0000166,  $P=4.1\times 10^{-8}$ ), 'ubiquitin-protein transferase  
1226 activity' (GO:0004842,  $P=8\times 10^{-8}$ ), 'threonine-type endopeptidase activity' (GO:0004298,  
1227  $P=1.1\times 10^{-5}$ ), 'DNA helicase activity' (GO:0003678,  $P=4.5\times 10^{-5}$ ) and 'DNA binding'  
1228 (GO:0003677,  $P=9.5\times 10^{-5}$ ) were the most frequently detected. Zinc finger and DNA repair  
1229 proteins, as well as DEAD/DEAH box helicase, RNA pseudouridylylate synthase and RNA  
1230 polymerase were among the most frequently detected proteins corresponding to the BP and  
1231 MF ontologies.

#### 1232 5.4.2. GO term enrichment in orthogroups expanded in pedunculate oak

1233 The 524 orthogroups expanded in oak comprise 5,910 genes (3 to 359 genes per orthogroup,  
1234 with a mean of 11.3 genes per orthogroup, **Supplementary Fig. 58**). In total, 366 orthogroups  
1235 were annotated with at least one GO term. The number of GO terms per gene family ranged  
1236 from 1 to 17 (mean value, 2.89). We found that 4,217 of the 5,910 genes (71.4%) were  
1237 annotated with at least one GO term (**Supplementary Table 42**). The annotation used 3,433  
1238 unique GO terms, including 1,722 singletons (GO terms used only once) (**Supplementary**  
1239 **Fig. 59**). We identified 58 significantly enriched GO terms (33 MF, 17 BP and 8 CC)  
1240 (**Supplementary Data Set 8 sheet #4**) in orthogroups displaying expansion in oaks. We  
1241 compared sample counts (numbers of genes annotated with particular GO terms among the

1242 genes belonging to the orthogroups expanded in oak) with genome counts (number of genes  
1243 annotated with particular GO terms among the 25,808 oak gene models; **Supplementary Fig.**  
1244 **60**). The enriched term with the best statistical support was ‘protein kinase activity’  
1245 (GO:0004672,  $P < 10^{-30}$ ), which was attributed to 726 genes (in the 524 expanded orthogroups)  
1246 of the 1,556 genes found in the 25,808 oak gene models, corresponding to two-fold  
1247 enrichment. These 726 genes belonged to 31 orthogroups containing genes encoding both  
1248 cytosolic (NB-LRRs) and membrane (LRR-RLKs, LRR-RLPs) receptors of the innate  
1249 immune system (i.e. R-genes). This overrepresentation of R-genes was also supported by the  
1250 enrichment of the orthogroups in the following annotations: ‘protein serine/threonine kinase  
1251 activity’ (GO:0004674), ‘protein binding’ (GO:0005515), ‘polysaccharide binding’  
1252 (GO:0030247), ‘ADP binding’ (GO:0043531), ‘protein phosphorylation’ (GO:0006468),  
1253 ‘signal transduction’ (GO:0007165), ‘recognition of pollen’ (GO:0048544), all with  $P < 10^{-30}$   
1254 and fold-enrichments of 1.7 to 3.9 (for ‘ADP binding’). The highest fold-enrichment (about  
1255 4.4) was observed for the MF ‘thioredoxin-disulfide reductase activity’ (GO:0004791,  
1256  $P = 8.4 \times 10^{-5}$ ) and the BP ‘removal of superoxide radicals’ (GO:0019430,  $P = 2.9 \times 10^{-5}$ ), with  
1257 seven genes annotated as pyridine nucleotide-disulfide oxidoreductases.

#### 1258 5.4.3. GO enrichment within the gene families expanded in woody 1259 perennial trees relative to herbaceous species

1260 Overall, 18,855 of the 36,844 othoMCL orthogroups (**Supplementary Data Set 3 sheet #1**)  
1261 (51.2%) were annotated with at least one GO term, with 16,703 orthogroups annotated for  
1262 molecular function (MF), 11,495 for biological process (BP) and 5,073 for cellular component  
1263 (CC). In total, 3,936 unique GO terms were used in the annotation. Of the 126 orthogroups  
1264 expanded in “trees” (**Supplementary Data Set 7 sheet #2**), 108 were annotated with GO  
1265 terms used in the GO term enrichment analysis. We detected significant enrichment for 61



1266 GO terms (38 MFs, 19 BPs and 4 CCs, **Supplementary Table 43 and Supplementary Data**  
1267 **Set 8 sheet #5**).

1268 The functions of the set of gene families expanded in woody species were identified against  
1269 the background of all orthogroups. The degree of orthogroup size expansion for statistically  
1270 significant GO terms, represented by fold-enrichment in woody perennials is depicted in  
1271 **Supplementary Fig. 7**. The term with most statistical support was ‘apoptotic process’  
1272 (GO:0006915,  $P=7.4\times 10^{-14}$ ). It was found in 10 of the 126 expanded orthogroups, but only 37  
1273 of the total number of 36,844 orthogroups, giving a fold-enrichment of 79 (**Supplementary**  
1274 **Fig. 7**). These 10 clusters included R-genes with a characteristic NB-ARC domain. ‘ATP  
1275 binding’ (GO:0005524,  $P=2.8\times 10^{-10}$ ), ‘ADP binding’ (GO:0043531,  $P=10^{-9}$ ), ‘protein  
1276 serine/threonine kinase activity’ (GO:0004674,  $P=6.4\times 10^{-7}$ ), ‘protein tyrosine kinase activity’  
1277 (GO:0004713,  $P=1.4\times 10^{-6}$ ), ‘protein phosphorylation’ (GO:0006468,  $P=1.8\times 10^{-6}$ ) ‘DNA  
1278 integration’ (GO:0015074,  $P=3.2\times 10^{-6}$ ), ‘polysaccharide binding’ (GO:0030247,  $P=1.7\times 10^{-5}$ ),  
1279 transmembrane signaling receptor activity’ (GO:0004888,  $P=9.6\times 10^{-5}$ ), ‘innate immune  
1280 response’ (GO:0045087,  $P=1.4\times 10^{-4}$ ) and ‘recognition of pollen’ (GO:0048544,  $P=2\times 10^{-4}$ )  
1281 ranked among the next most significant GO terms, with fold-enrichments ranging from 7 up  
1282 to 83.5 for ‘protein serine/threonine kinase activity’. The orthogroups concerned included  
1283 almost exclusively cytosolic and membrane receptors of the innate immune system  
1284 (**Supplementary Data Set 8 sheet #5**). For instance, the 10 most frequent orthogroups  
1285 (orthogroups #1000, 1004, 1021, 1084, 1006, 1010, 1016, 1017, 1037, 1003) cited 115 times  
1286 in a total of 367 occurrences, i.e. over 30%, corresponded to the two major types of plant  
1287 receptors: leucine-rich repeat-receptor-like kinase/receptor-like proteins (LRR-RLKs, LRR-  
1288 RLPs) and nucleotide-binding leucine-rich repeat proteins (NB-LRRs).

1289 **6. Web resources**

| Genome data                                                                                        | Web access                                                                                                                                                                                                                                                                                                                                                                                                                                                                                                                                                                                                                                                                                                                   |
|----------------------------------------------------------------------------------------------------|------------------------------------------------------------------------------------------------------------------------------------------------------------------------------------------------------------------------------------------------------------------------------------------------------------------------------------------------------------------------------------------------------------------------------------------------------------------------------------------------------------------------------------------------------------------------------------------------------------------------------------------------------------------------------------------------------------------------------|
| Oak genome assembly PM1N<br>(haploid version: 12<br>pseudomolecules + 538<br>unassigned scaffolds) | Download: <a href="https://urgi.versailles.inra.fr/download/oak/Qrob_PM1N.fa.gz">https://urgi.versailles.inra.fr/download/oak/Qrob_PM1N.fa.gz</a><br>Blast: <a href="https://urgi.versailles.inra.fr/blast">https://urgi.versailles.inra.fr/blast</a><br>Pseudomolecule: <a href="https://urgi.versailles.inra.fr/WebApollo_oak_PM1N/PseudoMolecule.html">https://urgi.versailles.inra.fr/WebApollo_oak_PM1N/PseudoMolecule.html</a><br>JBrowse: <a href="https://urgi.versailles.inra.fr/WebApollo_oak_PM1N/jbrowse">https://urgi.versailles.inra.fr/WebApollo_oak_PM1N/jbrowse</a><br>Intermine: <a href="https://urgi.versailles.inra.fr/OakMine_PM1N/begin.do">https://urgi.versailles.inra.fr/OakMine_PM1N/begin.do</a> |
| Oak genome assembly V2_2N<br>(diploid version 2)                                                   | Download: <a href="https://urgi.versailles.inra.fr/download/oak/Qrob_V2_2N.fa.gz">https://urgi.versailles.inra.fr/download/oak/Qrob_V2_2N.fa.gz</a><br>Blast: <a href="https://urgi.versailles.inra.fr/blast">https://urgi.versailles.inra.fr/blast</a><br>JBrowse: <a href="https://urgi.versailles.inra.fr/WebApollo_oak_V2/jbrowse/">https://urgi.versailles.inra.fr/WebApollo_oak_V2/jbrowse/</a>                                                                                                                                                                                                                                                                                                                        |
| Oak genome assembly V1_2N<br>(diploid version 1, <sup>19</sup> )                                   | Download: <a href="https://urgi.versailles.inra.fr/download/oak/Qrob_V1_2N.fa.gz">https://urgi.versailles.inra.fr/download/oak/Qrob_V1_2N.fa.gz</a><br>Blast: <a href="https://urgi.versailles.inra.fr/blast">https://urgi.versailles.inra.fr/blast</a>                                                                                                                                                                                                                                                                                                                                                                                                                                                                      |
| Oak transcriptome ( <i>de novo</i><br>assembly, <sup>23</sup> )                                    | Download: <a href="https://urgi.versailles.inra.fr/download/oak/OCV4_assembly_final.fsa.gz">https://urgi.versailles.inra.fr/download/oak/OCV4_assembly_final.fsa.gz</a><br>Blast: <a href="https://urgi.versailles.inra.fr/blast">https://urgi.versailles.inra.fr/blast</a>                                                                                                                                                                                                                                                                                                                                                                                                                                                  |
| Oak protein-coding sequences<br>predicted on PM1N (haploid<br>version)                             | Download CDS (aa) <a href="https://urgi.versailles.inra.fr/download/oak/Qrob_PM1N_CDS_aa_20161004.fa.gz">https://urgi.versailles.inra.fr/download/oak/Qrob_PM1N_CDS_aa_20161004.fa.gz</a><br>Download CDS (nt) <a href="https://urgi.versailles.inra.fr/download/oak/Qrob_PM1N_CDS_nt_20161004.fa.gz">https://urgi.versailles.inra.fr/download/oak/Qrob_PM1N_CDS_nt_20161004.fa.gz</a><br>Blast: <a href="https://urgi.versailles.inra.fr/blast">https://urgi.versailles.inra.fr/blast</a>                                                                                                                                                                                                                                   |

1290

1291 **7. Data availability**

1292 The oak haploid genome assembly and corresponding annotation have been deposited in the  
 1293 European Nucleotide Archive under project accession code PRJEB19898. Other sequence  
 1294 release data are indicated in **Supplementary tables 1, 13, 14 and 19 and Supplementary**  
 1295 **Data Set 10**. We also invite readers to download data stored at the URLs indicated in section  
 1296 6 (Web resources) as well as in the oakgenome web site: <http://www.oakgenome.fr>.

1297 **8. References**

- 1298 1. Manos, P. S. & Stanford, A. M. The historical biogeography of Fagaceae: tracking the  
 1299 tertiary history of temperate and subtropical forests of the Northern Hemisphere. *Int. J.*  
 1300 *Plant Sci.* **162**, S77--S93 (2001).
- 1301 2. Hubert, F. et al. Multiple nuclear genes stabilize the phylogenetic backbone of the

- 1302 genus *Quercus*. *Syst. Biodivers.* **12**, 405–423 (2014).
- 1303 3. Johnson, P. S. in *Silvics of North America 2, Hardwoods* (ed. Burns, R. M., Honkala,  
1304 B. H.) 686–692 (U.S. Department of Agriculture, For. Serv., 1990).
- 1305 4. Menitskii, I. L. & Fedorov, A. A. *Oaks of Asia*. (Science Publishers, 2005).
- 1306 5. Oldfield, S. & Eastwood, A. The red list of oaks. (2007).
- 1307 6. Cavender-Bares, J. Diversity, distribution, and ecosystem services of the North  
1308 American oaks. *Int. Oaks* **27**, 37–48 (2016).
- 1309 7. Antolin, F. & Jacomet, S. Wild fruit use among early farmers in the Neolithic (5400-  
1310 2300 cal bc) in the north-east of the Iberian Peninsula: an intensive practice? *Veg. Hist.*  
1311 *Archaeobot.* **24**, 19–33 (2015).
- 1312 8. Logan, W. B. *Oak: the frame of civilization*. (WW Norton & Company, 2005).
- 1313 9. Eaton, E., Caudullo, G., Oliveira, S. & de Rigo, D. *Quercus robur* and *Quercus petraea*  
1314 in Europe: distribution, habitat, usage and threats. *Quercus robur Quercus petraea Eur.*  
1315 *Distrib. habitat, usage Threat.* 160–163 (2016).
- 1316 10. Vinha, A. F., Barreira, J. C. M., Costa, A. S. G. & Oliveira, M. B. P. P. A new age for  
1317 *Quercus* spp. fruits: review on nutritional and phytochemical composition and related  
1318 biological activities of acorns. *Compr. Rev. Food Sci. Food Saf.* **15**, 947–981 (2016).
- 1319 11. Büntgen, U. et al. 2500 years of European climate variability and human susceptibility.  
1320 *Science (80-. )*. **331**, 578–582 (2011).
- 1321 12. Haneca, K., Čufar, K. & Beeckman, H. Oaks, tree-rings and wooden cultural heritage:  
1322 a review of the main characteristics and applications of oak dendrochronology in  
1323 Europe. *J. Archaeol. Sci.* **36**, 1–11 (2009).
- 1324 13. Cufar, K. et al. Common climatic signals affecting oak tree-ring growth in SE Central  
1325 Europe. *Trees* **28**, 1267–1277 (2014).
- 1326 14. Rani, J., Chauhan, P. & Tripathi, R. Li-Fi (Light Fidelity)-the future technology in

- 1327 wireless communication. *Int. J. Appl. Eng. Res.* **7**, 1517–1520 (2012).
- 1328 15. Faivre Rampant, P. et al. Analysis of BAC end sequences in oak, a keystone forest tree  
1329 species, providing insight into the composition of its genome. *BMC Genomics* **12**, 292  
1330 (2011).
- 1331 16. Chalhoub, B., Belcram, H. & Caboche, M. Efficient cloning of plant genomes into  
1332 bacterial artificial chromosome (BAC) libraries with larger and more uniform insert  
1333 size. *Plant Biotechnol. J.* **2**, 181–188 (2004).
- 1334 17. Bodénès, C. et al. Comparative mapping in the Fagaceae and beyond with EST-SSRs.  
1335 *BMC Plant Biol.* **12**, (2012).
- 1336 18. Bao, W., Kojima, K. K. & Kohany, O. Repbase Update, a database of repetitive  
1337 elements in eukaryotic genomes. *Mob. DNA* **6**, 11 (2015).
- 1338 19. Plomion, C. et al. Decoding the oak genome: public release of sequence data,  
1339 assembly, annotation and publication strategies. *Mol. Ecol. Resour.* **16**, 254–265  
1340 (2016).
- 1341 20. Sallet, E., Gouzy, J. & Schiex, T. EuGene-PP: a next-generation automated annotation  
1342 pipeline for prokaryotic genomes. *Bioinformatics* **30**, 2659–2661 (2014).
- 1343 21. Quevillon, E. et al. InterProScan: protein domains identifier. *Nucleic Acids Res.* **33**,  
1344 W116-20 (2005).
- 1345 22. Hebsgaard, S. M. et al. Splice site prediction in *Arabidopsis thaliana* pre-mRNA by  
1346 combining local and global sequence information. *Nucleic Acids Res.* **24**, 3439–52  
1347 (1996).
- 1348 23. Lesur, I. et al. The oak gene expression atlas: insights into Fagaceae genome evolution  
1349 and the discovery of genes regulated during bud dormancy release. *BMC Genomics* **16**,  
1350 112 (2015).
- 1351 24. Salamov, A. A. & Solovyev, V. V. Ab initio gene finding in *Drosophila* genomic

- 1352 DNA. *Genome Res.* **10**, 516–522 (2000).
- 1353 25. Stanke, M. & Morgenstern, B. AUGUSTUS: a web server for gene prediction in  
1354 eukaryotes that allows user-defined constraints. *Nucleic Acids Res.* **33**, 465–467  
1355 (2005).
- 1356 26. Noé, L. & Kucherov, G. YASS: enhancing the sensitivity of DNA similarity search.  
1357 *Nucleic Acids Res.* **33**, 540–543 (2005).
- 1358 27. Delcher, A. L., Phillippy, A., Carlton, J. & Salzberg, S. L. Fast algorithms for large-  
1359 scale genome alignment and comparison. *Nucleic Acids Res.* **30**, 2478–2483 (2002).
- 1360 28. Sullivan, M. J., Petty, N. K. & Beatson, S. A. Easyfig: a genome comparison  
1361 visualizer. *Bioinformatics* **27**, 1009–1010 (2011).
- 1362 29. Kent, W. J. BLAT — The BLAST -Like Alignment Tool. *Genome Res.* **12**, 656–664  
1363 (2002).
- 1364 30. Kurtz, S. et al. Versatile and open software for comparing large genomes. *Genome*  
1365 *Biol.* **5**, R12 (2004).
- 1366 31. Endelman, J. B. & Plomion, C. LPmerge: an R package for merging genetic maps by  
1367 linear programming. *Bioinformatics* **30**, 1623–1624 (2014).
- 1368 32. Bodénès, C., Chancerel, E., Ehrenmann, F., Kremer, A. & Plomion, C. High-density  
1369 linkage mapping and distribution of segregation distortion regions in the oak genome.  
1370 *DNA Res.* **23**, 115–124 (2016).
- 1371 33. Pont, C. et al. Wheat syntenome unveils new evidences of contrasted evolutionary  
1372 plasticity between paleo- and neoduplicated subgenomes. *Plant J.* **76**, 1030–1044  
1373 (2013).
- 1374 34. Katzourakis, A. Paleovirology: inferring viral evolution from host genome sequence  
1375 data. *Philos. Trans. R. Soc. Lond. B. Biol. Sci.* **368**, 20120493 (2013).
- 1376 35. Geering, A. D. W. Caulimoviridae (Plant Pararetroviruses). *eLS* (2007).

- 1377 36. Jakowitsch, J., Mette, M. F., van Der Winden, J., Matzke, M. a & Matzke, a J.  
1378 Integrated pararetroviral sequences define a unique class of dispersed repetitive DNA  
1379 in plants. *Proc. Natl. Acad. Sci. U. S. A.* **96**, 13241–13246 (1999).
- 1380 37. Geering, A. D. W. et al. Endogenous florendoviruses are major components of plant  
1381 genomes and hallmarks of virus evolution. *Nat. Commun.* **5**, 5269 (2014).
- 1382 38. Hu, T. T. et al. The *Arabidopsis lyrata* genome sequence and the basis of rapid genome  
1383 size change. *Nat. Genet.* **43**, 476–81 (2011).
- 1384 39. Verde, I. et al. The high-quality draft genome of peach (*Prunus persica*) identifies  
1385 unique patterns of genetic diversity, domestication and genome evolution. *Nat. Genet.*  
1386 **45**, 487–94 (2013).
- 1387 40. Velasco, R. et al. The genome of the domesticated apple (*Malus × domestica* Borkh.).  
1388 *Nat. Genet.* **42**, 833–839 (2010).
- 1389 41. Myburg, A. A. et al. The genome of *Eucalyptus grandis*. *Nature* **510**, 356–+ (2014).
- 1390 42. Ming, R. et al. The draft genome of the transgenic tropical fruit tree papaya (*Carica*  
1391 *papaya* Linnaeus). *Nature* **452**, 991–996 (2008).
- 1392 43. Wu, G. A. et al. Sequencing of diverse mandarin, pummelo and orange genomes  
1393 reveals complex history of admixture during citrus domestication. *Nat. Biotechnol.* **32**,  
1394 656–662 (2014).
- 1395 44. Flutre, T., Duprat, E., Feuillet, C. & Quesneville, H. Considering transposable element  
1396 diversification in de novo annotation approaches. *PLoS One* **6**, (2011).
- 1397 45. Maumus, F. & Quesneville, H. Ancestral repeats have shaped epigenome and genome  
1398 composition for millions of years in *Arabidopsis thaliana*. *Nat Commun* **5**, 4104  
1399 (2014).
- 1400 46. Ellinghaus, D., Kurtz, S. & Willhoeft, U. LTRharvest, an efficient and flexible  
1401 software for de novo detection of LTR retrotransposons. *BMC Bioinformatics* **9**, 18

- 1402 (2008).
- 1403 47. Baidouri, M. El et al. Widespread and frequent horizontal transfers of transposable  
1404 elements in plants. *Genome Res.* **24**, 831–838 (2014).
- 1405 48. Ma, J. & Bennetzen, J. L. Rapid recent growth and divergence of rice nuclear genomes.  
1406 *Proc. Natl. Acad. Sci. U. S. A.* **101**, 12404–10 (2004).
- 1407 49. Baidouri, M. El & Panaud, O. Comparative genomic paleontology across plant  
1408 kingdom reveals the dynamics of TE-driven genome evolution. *Genome Biol. Evol.* **5**,  
1409 954–965 (2013).
- 1410 50. Baucom, R. S. et al. Exceptional diversity, non-random distribution, and rapid  
1411 evolution of retroelements in the B73 maize genome. *PLoS Genet.* **5**, e1000732 (2009).
- 1412 51. Peterson-Burch, B. D., Nettleton, D. & Voytas, D. F. Genomic neighborhoods for  
1413 Arabidopsis retrotransposons: a role for targeted integration in the distribution of the  
1414 Metaviridae. *Genome Biol.* **5**, R78 (2004).
- 1415 52. Zytnicki, M. & Quesneville, H. S-MART, a software toolbox to aid RNA-Seq data  
1416 analysis. *PLoS One* **6**, e25988 (2011).
- 1417 53. Jiang, S.-Y. et al. Sucrose metabolism gene families and their biological functions. *Sci.*  
1418 *Rep.* **5**, 17583 (2015).
- 1419 54. Panchy, N., Lehti-Shiu, M. D. & Shiu, S.-H. Evolution of gene duplication in plants.  
1420 *Plant Physiol.* **171**, 2294–2316 (2016).
- 1421 55. Jung, J. S., Prestont, G. M., Smith, B. L., Guggino, W. B. & Agre, P. Molecular  
1422 structure of the water channel through aquaporin CHIP: the hourglass model. *J. Biol.*  
1423 *Chem.* **269**, 14648–14654 (1994).
- 1424 56. Murata, K. et al. Structural determinants of water permeation through aquaporin-1.  
1425 *Nature* **407**, 599–605 (2000).
- 1426 57. Froger, A., Tallur, B., Thomas, D. & Delamarche, C. Prediction of functional residues

- 1427 in water channels and related proteins. *Protein Sci.* **7**, 1458–1468 (1998).
- 1428 58. Johanson, U. et al. The complete set of genes encoding major intrinsic proteins in  
1429 Arabidopsis provides a framework for a new nomenclature for major intrinsic proteins  
1430 in plants. **126**, 1358–1369 (2016).
- 1431 59. Chaumont, F., Barrieu, F., Wojcik, E., Chrispeels, M. J. & Jung, R. Aquaporins  
1432 constitute a large and highly divergent protein family in maize. *Plant Physiol.* **125**,  
1433 1206–1215 (2001).
- 1434 60. Cohen, D. et al. Developmental and environmental regulation of aquaporin gene  
1435 expression across populus species: divergence or redundancy? *PLoS One* **8**, (2013).
- 1436 61. Gupta, A. & Sankararamakrishnan, R. Genome-wide analysis of major intrinsic  
1437 proteins in the tree plant *Populus trichocarpa*: characterization of XIP subfamily of  
1438 aquaporins from evolutionary perspective. *BMC Plant Biol.* **9**, 134 (2009).
- 1439 62. Dubos, C. et al. MYB transcription factors in Arabidopsis. *Trends Plant Sci.* **15**, 573–  
1440 581 (2010).
- 1441 63. Soler, M. et al. The Eucalyptus grandis R2R3-MYB transcription factor family:  
1442 evidence for woody growth-related evolution and function. *New Phytol.* **206**, 1364–  
1443 1377 (2015).
- 1444 66. Gonzalez, A., Mendenhall, J., Huo, Y. & Lloyd, A. TTG1 complex MYBs, MYB5 and  
1445 TT2, control outer seed coat differentiation. *Dev. Biol.* **325**, 412–421 (2009).
- 1446 67. Cavallini, E. et al. The phenylpropanoid pathway is controlled at different branches by  
1447 a set of R2R3-MYB C2 repressors in grapevine. *Plant Physiol.* **167**, 1448–70 (2015).
- 1448 68. Yoshida, K., Ma, D. & Constabel, C. P. The MYB182 protein down-regulates  
1449 proanthocyanidin and anthocyanin biosynthesis in poplar by repressing both structural  
1450 and regulatory flavonoid genes. *Plant Physiol.* **167**, 693–710 (2015).
- 1451 69. Soler, M. et al. The woody-preferential gene EgMYB88 regulates the biosynthesis of



- 1452 phenylpropanoid-derived compounds in wood. *Front. Plant Sci.* **7**, 1422 (2016).
- 1453 70. Hanada, K., Zou, C., Lehti-Shiu, M. D., Shinozaki, K. & Shiu, S.-H. Importance of  
1454 lineage-specific expansion of plant tandem duplicates in the adaptive response to  
1455 environmental stimuli. *Plant Physiol.* **148**, 993–1003 (2008).
- 1456 71. Chen, L.-Q. et al. Sugar transporters for intercellular exchange and nutrition of  
1457 pathogens. *Nature* **468**, 527–32 (2010).
- 1458 72. Chen, L.-Q. et al. A cascade of sequentially expressed sucrose transporters in the seed  
1459 coat and endosperm provides nutrition for the Arabidopsis embryo. *Plant Cell* **27**, 607–  
1460 19 (2015).
- 1461 73. Tarkka, M. T. et al. OakContigDF159.1, a reference library for studying differential  
1462 gene expression in *Quercus robur* during controlled biotic interactions: use for  
1463 quantitative transcriptomic profiling of oak roots in ectomycorrhizal symbiosis. *New*  
1464 *Phytol.* **199**, 529–540 (2013).
- 1465 74. Herrmann, S. et al. Endogenous rhythmic growth, a trait suitable for the study of  
1466 interplays between multitrophic interactions and tree development. *Perspect. Plant*  
1467 *Ecol. Evol. Syst.* **19**, 40–48 (2016).
- 1468 75. Herrmann, S., Munch, J. C. & Buscot, F. A gnotobiotic culture system with oak  
1469 microcuttings to study specific effects of mycobionts on plant morphology before, and  
1470 in the early phase of, ectomycorrhiza formation *Paxillus involutus* and *Piloderma*  
1471 *croceum*. *New Phytol.* **138**, 203–212 (1998).
- 1472 76. Kurth, F. et al. Large scale transcriptome analysis reveals interplay between  
1473 development of forest trees and a beneficial mycorrhiza helper bacterium. *BMC*  
1474 *Genomics* **16**, 658 (2015).
- 1475 77. Chen, L.-Q. et al. Sucrose efflux mediated by SWEET proteins as a key step for  
1476 phloem transport. *Science (80-. ).* **335**, 207–211 (2012).

- 1477 78. Manck-Götzenberger, J. & Requena, N. Arbuscular mycorrhiza symbiosis induces a  
1478 major transcriptional reprogramming of the potato SWEET sugar transporter family.  
1479 *Front. Plant Sci.* **7**, 1–14 (2016).
- 1480 79. Manck-Götzenberger, J. & Requena, N. Arbuscular mycorrhiza symbiosis induces a  
1481 major transcriptional reprogramming of the potato SWEET sugar transporter family.  
1482 *Front. Plant Sci.* **7**, 1–14 (2016).
- 1483 80. Perotto, S. et al. Gene expression in mycorrhizal orchid protocorms suggests a friendly  
1484 plant-fungus relationship. *Planta* **239**, 1337–1349 (2014).
- 1485 81. Guo, W.-J. et al. SWEET17, a facilitative transporter, mediates fructose transport  
1486 across the tonoplast of Arabidopsis roots and leaves. *Plant Physiol.* **164**, 777–89  
1487 (2014).
- 1488 82. Couturier, J., Chibani, K., Jacquot, J.-P. & Rouhier, N. Cysteine-based redox regulation  
1489 and signaling in plants. *Front. Plant Sci.* **4**, 105 (2013).
- 1490 83. Couturier, J., Jacquot, J. P. & Rouhier, N. Evolution and diversity of glutaredoxins in  
1491 photosynthetic organisms. *Cell. Mol. Life Sci.* **66**, 2539–2557 (2009).
- 1492 84. Chibani, K., Wingsle, G., Jacquot, J. P., Gelhaye, E. & Rouhier, N. Comparative  
1493 genomic study of the thioredoxin family in photosynthetic organisms with emphasis on  
1494 *populus trichocarpa*. *Mol. Plant* **2**, 308–322 (2009).
- 1495 85. Lallement, P. A., Brouwer, B., Keech, O., Hecker, A. & Rouhier, N. The still  
1496 mysterious roles of cysteine-containing glutathione transferases in plants. *Front.*  
1497 *Pharmacol.* **5**, 1–22 (2014).
- 1498 86. Limkaisang, S. et al. Molecular phylogenetic analyses reveal a close relationship  
1499 between powdery mildew fungi on some tropical trees and *Erysiphe alphitoides*, an oak  
1500 powdery mildew. *Mycoscience* **47**, 327–335 (2006).
- 1501 87. Glawe, D. A. The powdery mildews: a review of the world's most familiar (yet poorly

- 1502 known) plant pathogens. *Annu. Rev. Phytopathol.* **46**, 27–51 (2008).
- 1503 88. Jørgensen, J. H. Discovery, characterization and exploitation of Mlo powdery mildew  
1504 resistance in barley. *Euphytica* **63**, 141–152 (1992).
- 1505 89. Büschges, R. et al. The barley Mlo gene: a novel control element of plant pathogen  
1506 resistance. *Cell* **88**, 695–705 (1997).
- 1507 90. Piffanelli, P. et al. A barley cultivation-associated polymorphism conveys resistance to  
1508 powdery mildew. *Nature* **430**, 887–891 (2004).
- 1509 91. Acevedo-Garcia, J., Kusch, S. & Panstruga, R. *Magical mystery tour*: MLO proteins in  
1510 plant immunity and beyond. *J. Physiol.* **204**, 273–281 (2014).
- 1511 92. Pessina, S. et al. Characterization of the MLO gene family in Rosaceae and gene  
1512 expression analysis in *Malus domestica*. *BMC Genomics* **15**, 618 (2014).
- 1513 93. Kusch, S., Pesch, L. & Panstruga, R. Comprehensive phylogenetic analysis sheds light  
1514 on the diversity and origin of the MLO family of integral membrane proteins. *Genome*  
1515 *Biol. Evol.* **8**, 878–895 (2016).
- 1516 94. Kessler, S. A. et al. Conserved molecular components for pollen tube reception and  
1517 fungal invasion. *Science (80-. )*. **330**, 968–971 (2010).
- 1518 95. Consonni, C. et al. Conserved requirement for a plant host cell protein in powdery  
1519 mildew pathogenesis. *Nat. Genet.* **38**, 716–720 (2006).
- 1520 96. Steuernagel, B., Jupe, F., Witek, K., Jones, J. D. G. & Wulff, B. B. H. NLR-parser:  
1521 rapid annotation of plant NLR complements. *Bioinformatics* **31**, 1665–1667 (2015).
- 1522 97. Marchler-Bauer, A. et al. CDD: NCBI’s conserved domain database. *Nucleic Acids*  
1523 *Res.* **43**, D222–D226 (2015).
- 1524 98. Sarris, P. F., Cevik, V., Dagdas, G., Jones, J. D. G. & Krasileva, K. V. Comparative  
1525 analysis of plant immune receptor architectures uncovers host proteins likely targeted  
1526 by pathogens. *BMC Biol.* **14**, 8 (2016).

- 1527 99. Kroj, T., Chanclud, E., Michel-Romiti, C., Grand, X. & Morel, J. B. Integration of  
1528 decoy domains derived from protein targets of pathogen effectors into plant immune  
1529 receptors is widespread. *New Phytol.* **210**, 618–626 (2016).
- 1530 100. Le Roux, C. et al. A receptor pair with an integrated decoy converts pathogen disabling  
1531 of transcription factors to immunity. *Cell* **161**, 1074–1088 (2015).
- 1532 101. Sarris, P. F. et al. A plant immune receptor detects pathogen effectors that target  
1533 WRKY transcription factors. *Cell* **161**, 1089–1100 (2015).
- 1534 102. Meyers, B. C., Kozik, A., Griego, A., Kuang, H. & Michelmore, R. W. Genome-wide  
1535 analysis of NBS-LRR – encoding genes in Arabidopsis. *Plant Cell* **15**, 809–834 (2003).
- 1536 103. Mun, J. H., Yu, H. J., Park, S. & Park, B. S. Genome-wide identification of NBS-  
1537 encoding resistance genes in *Brassica rapa*. *Mol. Genet. Genomics* **282**, 617–631  
1538 (2009).
- 1539 104. Kohler, A. et al. Genome-wide identification of NBS resistance genes in *Populus*  
1540 *trichocarpa*. *Plant Mol. Biol.* **66**, 619–636 (2008).
- 1541 105. Jupe, F. et al. Identification and localisation of the NB-LRR gene family within the  
1542 potato genome. *BMC Genomics* **13**, 75 (2012).
- 1543 106. Eddy, S. R. A probabilistic model of local sequence alignment that simplifies statistical  
1544 significance estimation. *PLoS Comput. Biol.* **4**, e1000069 (2008).
- 1545 107. Gouy, M., Guindon, S. & Gascuel, O. SeaView version 4: a multiplatform graphical  
1546 user interface for sequence alignment and phylogenetic tree building. *Mol. Biol. Evol.*  
1547 **27**, 221–224 (2010).
- 1548 108. Stamatakis, A. RAxML-VI-HPC: maximum likelihood-based phylogenetic analyses  
1549 with thousands of taxa and mixed models. *Bioinformatics* **22**, 2688–2690 (2006).
- 1550 109. Eddy, S. R. a New Generation of Homology Search Tools Based on Probabilistic  
1551 Inference. *Genome Informatics* **23**, 205–211 (2009).

- 1552 110. Katoh, K., Kuma, K. I., Toh, H. & Miyata, T. MAFFT version 5: improvement in  
1553 accuracy of multiple sequence alignment. *Nucleic Acids Res.* **33**, 511–518 (2005).
- 1554 111. Capella-Gutiérrez, S., Silla-Martínez, J. M. & Gabaldón, T. trimAl: a tool for  
1555 automated alignment trimming in large-scale phylogenetic analyses. *Bioinformatics* **25**,  
1556 1972–1973 (2009).
- 1557 112. Price, M. N., Dehal, P. S. & Arkin, A. P. FastTree 2--approximately maximum-  
1558 likelihood trees for large alignments. *PLoS One* **5**, e9490 (2010).
- 1559 113. Fischer, I., Diévar, A., Droc, G., Dufayard, J.-F. & Chantret, N. Evolutionary  
1560 dynamics of the leucine-rich repeat receptor-like kinase (LRR-RLK) subfamily in  
1561 angiosperms. *Plant Physiol.* **170**, 1595–1610 (2016).
- 1562 114. Guindon, S. et al. New algorithms and methods to estimate maximum-likelihood  
1563 phylogenies: Assessing the performance of PhyML 3.0. *Syst. Biol.* **59**, 307–321 (2010).
- 1564 115. Fischer, I. et al. Impact of recurrent gene duplication on adaptation of plant genomes.  
1565 *BMC Plant Biol.* **14**, 151 (2014).
- 1566 116. Löytynoja, A. & Goldman, N. An algorithm for progressive multiple alignment of  
1567 sequences with insertions. *Proc. Natl. Acad. Sci. U. S. A.* **102**, 10557–62 (2005).
- 1568 117. Penn, O., Privman, E., Landan, G., Graur, D. & Pupko, T. An alignment confidence  
1569 score capturing robustness to guide tree uncertainty. *Mol. Biol. Evol.* **27**, 1759–1767  
1570 (2010).
- 1571 118. De Mita, S. & Siol, M. EggLib: processing, analysis and simulation tools for  
1572 population genetics and genomics. *BMC Genet.* **13**, 27 (2012).
- 1573 119. Yang, Z. PAML 4: phylogenetic analysis by maximum likelihood. *Mol. Biol. Evol.* **24**,  
1574 1586–1591 (2007).
- 1575 120. Enkhbayar, P., Kamiya, M., Osaki, M., Matsumoto, T. & Matsushima, N. Structural  
1576 principles of leucine-rich repeat (LRR) proteins. *Proteins Struct. Funct. Genet.* **54**,

- 1577 394–403 (2004).
- 1578 121. Jones, D. A. & Jones, J. D. G. The role of leucine-rich repeat proteins in plant  
1579 defences. *Adv. Bot. Res.* **24**, 89–167 (1997).
- 1580 122. Parniske, M. et al. Novel disease resistance specificities result from sequence exchange  
1581 between tandemly repeated genes at the Cf-4/9 locus of tomato. *Cell* **91**, 821–832  
1582 (1997).
- 1583 123. Wang, G.-L. Xa21D encodes a receptor-like molecule with a leucine-rich repeat  
1584 domain that determines race-specific recognition and is subject to adaptive evolution.  
1585 *Plant Cell Online* **10**, 765–780 (1998).
- 1586 124. Werner, R. A. et al. Biosynthesis of gallic acid in *Rhus typhina*: discrimination between  
1587 alternative pathways from natural oxygen isotope abundance. *Phytochemistry* **65**,  
1588 2809–2813 (2004).
- 1589 125. Niemetz, R. & Gross, G. G. Enzymology of gallotannin and ellagitannin biosynthesis.  
1590 *Phytochemistry* **66**, 2001–2011 (2005).
- 1591 126. Mittasch, J., Böttcher, C., Frolova, N., Bönn, M. & Milkowski, C. Identification of  
1592 UGT84A13 as a candidate enzyme for the first committed step of gallotannin  
1593 biosynthesis in pedunculate oak (*Quercus robur*). *Phytochemistry* **99**, 44–51 (2014).
- 1594 127. Tzin, V. & Galili, G. The biosynthetic pathways for shikimate and aromatic amino  
1595 acids in *Arabidopsis thaliana*. *Arab. B.* **8**, e0132 (2010).
- 1596 128. Ross, J., Li, Y., Lim, E. & Bowles, D. J. Higher plant glycosyltransferases. *Genome*  
1597 *Biol.* **2**, 3004 (2001).
- 1598 129. Yonekura-Sakakibara, K. & Hanada, K. An evolutionary view of functional diversity in  
1599 family 1 glycosyltransferases. *Plant J.* **66**, 182–193 (2011).
- 1600 130. McCaig, B. C., Meagher, R. B. & Dean, J. F. D. Gene structure and molecular analysis  
1601 of the laccase-like multicopper oxidase (LMCO) gene family in *Arabidopsis thaliana*.

- 1602 *Planta* **221**, 619–636 (2005).
- 1603 131. Messerschmidt, A. & Huber, R. The blue oxidases, ascorbate oxidase, laccase and  
1604 ceruloplasmin modelling and structural relationships. *Eur. J. Biochem.* **187**, 341–352  
1605 (1990).
- 1606 132. Berthet, S. et al. Role of plant laccases in lignin polymerization. *Adv. Bot. Res.* **61**,  
1607 145–172 (2012).
- 1608 133. Pourcel, L. et al. Transparent Testa10 encodes a laccase-like enzyme involved in  
1609 oxidative polymerization of flavonoids in Arabidopsis seed coat. *Plant Cell* **17**, 2966–  
1610 2980 (2005).
- 1611 134. Zhao, Q. et al. LACCASE is necessary and nonredundant with PEROXIDASE for  
1612 lignin polymerization during vascular development in Arabidopsis. *Plant Cell* **25**,  
1613 3976–3987 (2013).
- 1614 135. Lu, S. et al. Ptr-miR397a is a negative regulator of laccase genes affecting lignin  
1615 content in *Populus trichocarpa*. *Proc. Natl. Acad. Sci. U. S. A.* **110**, 10848–53 (2013).
- 1616 136. Dobin, A. et al. STAR: ultrafast universal RNA-seq aligner. *Bioinformatics* **29**, 15–21  
1617 (2013).
- 1618 137. Li, H. et al. The Sequence Alignment/Map format and SAMtools. *Bioinformatics* **25**,  
1619 2078–2079 (2009).
- 1620 138. Pertea, M. et al. StringTie enables improved reconstruction of a transcriptome from  
1621 RNA-seq reads. *Nat. Biotechnol.* **33**, 290–5 (2015).
- 1622 139. Lowe, T. M. & Eddy, S. R. tRNAscan-SE: a program for improved detection of transfer  
1623 RNA genes in genomic sequence. *Nucleic Acids Res.* **25**, 955–964 (1997).
- 1624 140. Lagesen, K. et al. RNAmmer: consistent and rapid annotation of ribosomal RNA  
1625 genes. *Nucleic Acids Res.* **35**, 3100–3108 (2007).

- 1626 141. Nawrocki, E. P. & Eddy, S. R. Infernal 1.1: 100-fold faster RNA homology searches.  
1627 *Bioinformatics* **29**, 2933–2935 (2013).
- 1628 142. Nawrocki, E. P. et al. Rfam 12.0: updates to the RNA families database. *Nucleic Acids*  
1629 *Res.* **43**, D130–D137 (2015).
- 1630 143. Kozomara, A. & Griffiths-Jones, S. MiRBase: annotating high confidence microRNAs  
1631 using deep sequencing data. *Nucleic Acids Res.* **42**, D68–73 (2014).
- 1632 144. Camacho, C. et al. BLAST+: architecture and applications. *BMC Bioinformatics* **10**,  
1633 421 (2009).
- 1634 145. Langmead, B. & Salzberg, S. L. Fast gapped-read alignment with Bowtie 2. *Nat*  
1635 *Methods* **9**, 357–359 (2012).
- 1636 146. Liao, Y., Smyth, G. K. & Shi, W. FeatureCounts: an efficient general purpose program  
1637 for assigning sequence reads to genomic features. *Bioinformatics* **30**, 923–930 (2014).
- 1638 147. Quinlan, A. R. & Hall, I. M. BEDTools: a flexible suite of utilities for comparing  
1639 genomic features. *Bioinformatics* **26**, 841–842 (2010).
- 1640 148. Chen, J., Gl, S. & Lascoux, M. Genetic diversity and the efficacy of purifying selection  
1641 across plant and animal species. *Mol. Biol. Evol.* **34**, 1417–1428 (2017).
- 1642 149. Fitzjohn, R. G. et al. How much of the world is woody? *J. Ecol.* **102**, 1266–1272  
1643 (2014).
- 1644 150. Beaulieu, J. M., O’Meara, B. C. & Donoghue, M. J. Identifying hidden rate changes in  
1645 the evolution of a binary morphological character: the evolution of plant habit in  
1646 campanulid angiosperms. *Syst. Biol.* **62**, 725–737 (2013).
- 1647 151. Lens, F. et al. Embolism resistance as a key mechanism to understand adaptive plant  
1648 strategies. *Current Opinion in Plant Biology* **16**, 287–292 (2013).



- 1649 152. Zanne, A. E. et al. Three keys to the radiation of angiosperms into freezing  
1650 environments. *Nature* **506**, 89–92 (2014).
- 1651 153. Guo, S. et al. The draft genome of watermelon (*Citrullus lanatus*) and resequencing of  
1652 20 diverse accessions. *Nat. Genet.* **45**, 51–8 (2013).
- 1653 154. Shulaev, V. et al. The genome of woodland strawberry (*Fragaria vesca*). *Nat. Genet.*  
1654 **43**, 109–116 (2011).
- 1655 155. Schmutz, J. et al. Genome sequence of the palaeopolyploid soybean. *Nature* **463**, 178–  
1656 83 (2010).
- 1657 156. Chan, A. P. et al. Draft genome sequence of the oilseed species *Ricinus communis*. *Nat.*  
1658 *Biotechnol.* **28**, 951–6 (2010).
- 1659 157. Sanderkar, M. & Nielsen, K. L. Genome sequence and analysis of the tuber crop  
1660 potato : the potato genome sequencing consortium. *Nature* **476**, 189–195 (2011).
- 1661 158. Tuskan, G. A. et al. The genome of black cottonwood, *Populus trichocarpa* (Torr.  
1662 & Gray). *Science* **313**, 1596–604 (2006).
- 1663 159. Motamayor, J. C. et al. The genome sequence of the most widely cultivated cacao type  
1664 and its use to identify candidate genes regulating pod color. *Genome Biol.* **14**, r53  
1665 (2013).
- 1666 160. Jaillon, O. et al. The grapevine genome sequence suggests ancestral hexaploidization in  
1667 major angiosperm phyla. *Nature* **449**, 463–7 (2007).
- 1668 161. Chen, Z. et al. Two seven-transmembrane domain MILDEW RESISTANCE LOCUS  
1669 O proteins cofunction in Arabidopsis root thigmomorphogenesis. *Plant Cell* **21**, 1972–  
1670 1991 (2009).
- 1671 162. Iovieno, P. et al. Structure , evolution and functional inference on the Mildew Locus O  
1672 ( MLO ) gene family in three cultivated. *BMC Genomics* 1–13 (2015).
- 1673 163. Zhou, S. J., Jing, Z. & Shi, J. L. Genome-wide identification, characterization, and

- 1674 expression analysis of the MLO gene family in *Cucumis sativus*. *Genet. Mol. Res.* **12**,  
1675 6565–78 (2013).
- 1676 164. Deshmukh, R. & Singh, V. K. S. B. D. Comparative phylogenetic analysis of genome -  
1677 wide Mlo gene family members from *Glycine max* and *Arabidopsis thaliana*. 345–359  
1678 (2014).
- 1679 165. Wang, X. et al. Genome-wide characterization and comparative analysis of the MLO  
1680 gene family in cotton. *Plant Physiol. Biochem.* **103**, 106–119 (2016).
- 1681 166. Liu, Q. & Zhu, H. Molecular evolution of the MLO gene family in *Oryza sativa* and  
1682 their functional divergence. *Gene* **409**, 1–10 (2008).
- 1683 167. Jiwan, D., Roalson, E. H., Main, D. & Dhingra, A. Antisense expression of peach  
1684 mildew resistance locus O (PpMlo1) gene confers cross-species resistance to powdery  
1685 mildew in *Fragaria x ananassa*. *Transgenic Res.* **22**, 1119–1131 (2013).
- 1686 168. Chen, Y., Wang, Y., Zhang, H. & others. Genome-wide analysis of the mildew  
1687 resistance locus o ('MLO') gene family in tomato (*Solanum lycopersicum* L.). *Plant*  
1688 *Omics* **7**, 87 (2014).
- 1689 169. Appiano, M. et al. Identification of candidate MLO powdery mildew susceptibility  
1690 genes in cultivated Solanaceae and functional characterization of tobacco NtMLO1.  
1691 *Transgenic Res.* **24**, 847–858 (2015).
- 1692 170. Konishi, S., Sasakuma, T. & Sasanuma, T. Identification of novel Mlo family members  
1693 in wheat and their genetic characterization. *Genes Genet. Syst.* **85**, 167–175 (2010).
- 1694 171. Feechan, A., Jermakow, A. M., Torregrosa, L., Panstruga, R. & Dry, I. B. Identification  
1695 of grapevine MLO gene candidates involved in susceptibility to powdery mildew.  
1696 *Funct. Plant Biol.* **35**, 1255–1266 (2008).
- 1697 172. Chai, G. et al. R2R3-MYB gene pairs in *Populus*: Evolution and contribution to  
1698 secondary wall formation and flowering time. *J. Exp. Bot.* **65**, 4255–4269 (2014).

- 1699 173. Katoh, K., Misawa, K., Kuma, K. & Miyata, T. MAFFT: a novel method for rapid  
1700 multiple sequence alignment based on fast Fourier transform. *Nucleic Acids Res.* **30**,  
1701 3059–3066 (2002).
- 1702 174. Tamura, K. et al. MEGA5: Molecular evolutionary genetics analysis using maximum  
1703 likelihood, evolutionary distance, and maximum parsimony methods. *Mol. Biol. Evol.*  
1704 **28**, 2731–2739 (2011).
- 1705 175. Sievers, F. et al. Fast, scalable generation of high-quality protein multiple sequence  
1706 alignments using Clustal-Omega. *Mol. Syst. Biol.* **7**, 539 (2011).
- 1707 176. Castresana, J. Selection of conserved blocks from multiple alignments for their use in  
1708 phylogenetic analysis. *Mol. Biol. Evol.* **17**, 540–552 (2000).
- 1709 177. Gascuel, O. BioNJ: an improved version of the NJ algorithm based on a simple model  
1710 of sequence data. *Mol. Biol. Evol.* **14**, 685–95 (1997).
- 1711 178. Dereeper, A. et al. Phylogeny.fr: robust phylogenetic analysis for the non-specialist.  
1712 *Nucleic Acids Res* **36**, W465--9 (2008).
- 1713
- 1714

1715 **9. Supplementary Data Sets**

1716

1717 **Supplementary Data Set 1 List of 25,808 oak gene models with their annotations.**

1718 **Supplementary Data Set 2 Mapping data used to anchor the scaffolds onto the oak**

1719 **genetic linkage map.** Sheet #1: List of 5,589 mapped markers. Sheet #2: Subset of 2,615

1720 markers matching sequence scaffolds, classified by categories according to **Supplementary**

1721 **Table 27.** Sheet #3: syntenic relationships between oak markers and peach gene models.

1722 Sheet #4 ordered scaffolds along the 12 chromosomes.

1723 **Supplementary Data Set 3 List of orthogroups (orthoMCL analysis) and expanded gene**

1724 **families (CAFE analysis) in pedunculate oak.** Sheet #1 List of clusters obtained with

1725 orthoMCL. The family *P*-value is provided by CAFE and corresponds to the probability of

1726 observing the data (orthogroup size distribution between taxa). Orthogroups with larger size

1727 variance are expected to have lower *P*-values. The *Qr*-*P*-value is the oak branch-specific *P*-

1728 value. It corresponds to the probability of transitions between the parent and child family sizes

1729 for the oak branch. A low *P*-value indicates a rapidly evolving orthogroup. These data were

1730 provided by CAFE. Sheet #2 List of clusters expanded in oak. Sheet#3 list of outstanding

1731 outlier clusters expanded in oak. Sheet#4 list of clusters contracted in oak.

1732 **Supplementary Data Set 4 List of gene categories.** Sheet #1: tandemly duplicated genes

1733 (TDG). Sheet #2: list of TDG relationships. Sheet #3: long distance-duplicated genes (LDG).

1734 Sheet #4: singleton genes (SG).

1735 **Supplementary Data Set 5 Classification of NB-LRR-related genes.** List of oak NB-LRR-

1736 related genes. For each gene, the gene model ID and the proteinID are provided. NB-LRR

1737 genes were classified into categories according to their canonical domains, i.e. CC, coiled-

1738 coil; LRR, leucine-rich repeat; NB, nucleotide-binding; RPW8, resistance to powdery mildew

1739 protein; TIR, Toll interleukin receptor-like; X, putative integrated decoy. The position of the  
1740 genes (gene start and gene end) on pseudomolecules or unassigned scaffolds is indicated. The  
1741 orthogroup ID is also provided for the orthoMCL analysis, together with the  
1742 family expansion/contraction status (oak vs. other species, 1% threshold), and tandem  
1743 duplication status.

1744 **Supplementary Data Set 6 Classification of RLK-related genes.** Sheet #1: list of RLK-  
1745 related genes from oak, Arabidopsis and rice - phylogeny and assignment. Sheet #2:  
1746 subgroups of RLK-related genes and subgroups within LRR-RLK from sheet #1. Sheet #3  
1747 data from Fischer et al.<sup>113</sup> for comparison with oak. Sheet #4: list of oak genes from sheet #1,  
1748 with their classification into orthoMCL orthogroups and their status (in a tandem array or  
1749 not). Sheet #5: results from sheet #4.

1750 **Supplementary Data Set 7 Summary of orthogroups expanded in ‘trees’.** Sheet #1: *P*-  
1751 value and FDR for all orthoMCL orthogroups. Sheet #2: orthogroups expanded (FDR<0.05)  
1752 in ‘trees’. Sheet #3: list of outstanding ‘tree’ orthogroups and their functional annotations.  
1753 Sheet #4: orthogroups expanded [contracted] in herbaceous species [trees].

1754 **Supplementary Data Set 8 Summary of the Gene Ontology (GO) term analysis showing**  
1755 **significantly enrichment in GO terms for molecular functions (MF), biological processes**  
1756 **(BP), and cellular components (CC).** Sheet #1: tandem duplicated genes (TDGs). Sheet #2:  
1757 long distance-duplicated genes (LDGs). Sheet #3: singletons (SGs). Sheet #4: orthogroups  
1758 expanded in oak. Sheet #5: orthogroups expanded in woody perennials. Sheet #6: expanded  
1759 orthogroups in herbaceous species. *P*-values are from Fisher’s exact tests.

1760 **Supplementary Data Set 9 Footprint of selection in RLK-related genes.** Sheet #1: ID of  
1761 ultraparalogous genes with their association group, annotation, orthoMCL orthogroup and

1762 label from **Fig. 3d and 4b**. Sheet #2: codeml results for 24 groups of ultraparalogs. Sheet #3:  
1763 results of all the manually validated sites (domain plus position in the LRR motif).

1764 **Supplementary Data Set 10 List of pedunculate oak BAC clones used in this study.** Sheet  
1765 #1: list of sequenced BAC clones and matching scaffolds on the diploid version of the oak  
1766 genome sequence. Sheet #2: gene annotation on the sequenced BACs.

1767

1768

1769



1771 **Supplementary Table 1 List of genomic and cDNA libraries used to sequence and annotate the pedunculate oak genome accession "3P".**  
 1772 DNaseq: genomic libraries used to sequence the oak genome. RNAseq: cDNA libraries used to annotate the oak genome.

1773

| Project       | Material | Filename                            | # reads   | # bases     | Library                 | Technology       | Accession ID | Diploid genome (1.5G/2C) coverage |
|---------------|----------|-------------------------------------|-----------|-------------|-------------------------|------------------|--------------|-----------------------------------|
| <b>DNaseq</b> |          |                                     |           |             |                         |                  |              |                                   |
| Qr            | A        | Oak_7_1_sequence.fastq              | 62418280  | 4681371000  | Paired-end              | Illumina (GAIIx) | SRX739064    | 3x                                |
| Qr            | B        | Oak_5Kb_MatePair_6_1_sequence.fastq | 56012498  | 2800624900  | Mate-pairs 5 Kb         | Illumina (GAIIx) | SRX739054    | 2x                                |
| AWU           | A        | AWU_AOSC_3_D11KBACXX.IND3           | 183557983 | 35871118970 | Mate-pairs 3Kb          | Illumina         | ERX546778    | 24x                               |
| AWU           | A        | AWU_AOSF_1_C0BULACXX.IND1           | 33955645  | 6731457878  | overlapping PE          | Illumina         | ERX546816    | 86x                               |
| AWU           | A        | AWU_AOSF_1_D0J4FACXX.IND1           | 184348978 | 36406701485 | overlapping PE          | Illumina         | ERX546795    |                                   |
| AWU           | A        | AWU_AOSF_2_D0J4FACXX.IND1           | 173912862 | 34132669204 | overlapping PE          | Illumina         | ERX546803    |                                   |
| AWU           | A        | AWU_AOSF_4_D0J4KACXX.IND1           | 118761014 | 23565095820 | overlapping PE          | Illumina         | ERX546766    |                                   |
| AWU           | A        | AWU_AOSF_6_C0D1LACXX.IND1           | 142592731 | 28210290830 | overlapping PE          | Illumina         | ERX546794    |                                   |
| AWU           | A        | AWU_AOSN_2_C2MP1ACXX.IND18          | 112059267 | 18207771474 | Mate-pairs Nextera 3 Kb | Illumina         | ERX546793    | 26x                               |
| AWU           | A        | AWU_AOSN_4_D2BM7ACXX.IND18          | 130196132 | 21273821373 | Mate-pairs Nextera 3 Kb | Illumina         | ERX546821    |                                   |
| AWU           | A        | AWU_AOSN_1_C2MP1ACXX.IND2           | 128515390 | 20882553184 | Mate-pairs Nextera 5 Kb | Illumina         | ERX546851    | 35x                               |
| AWU           | A        | AWU_AOSN_4_D2C4BACXX.IND2           | 128931290 | 21392347587 | Mate-pairs Nextera 5 Kb | Illumina         | ERX546756    |                                   |
| AWU           | A        | AWU_AOSN_7_D25ULACXX.IND2           | 63924125  | 10508889688 | Mate-pairs Nextera 5 Kb | Illumina         | ERX546847    |                                   |
| AWU           | A        | AWU_AOSN_4_D2C5KACXX.IND4           | 132901113 | 21958813992 | Mate-pairs Nextera 8 Kb | Illumina         | ERX546787    | 22x                               |
| AWU           | A        | AWU_AOSN_7_D25ULACXX.IND4           | 65407657  | 10724020167 | Mate-pairs Nextera 8 Kb | Illumina         | ERX546842    |                                   |
| AWU           | A        | AWU_AORS_HLG9GIU01                  | 376951    | 139474495   | Single Reads            | 454              | ERX546760    | 15x                               |
| AWU           | A        | AWU_AORS_HO6MKXJ01                  | 615920    | 275537385   | Single Reads            | 454              | ERX546817    |                                   |
| AWU           | A        | AWU_AORS_HO6MKXJ02                  | 600921    | 244313411   | Single Reads            | 454              | ERX546828    |                                   |



|     |   |                     |        |           |              |     |           |
|-----|---|---------------------|--------|-----------|--------------|-----|-----------|
| AWU | A | AWU_AORS_HO8LWZP01  | 566389 | 250562733 | Single Reads | 454 | ERX546783 |
| AWU | A | AWU_AORS_HO8LWZP02  | 576975 | 250783193 | Single Reads | 454 | ERX546855 |
| AWU | A | AWU_AORS_HOGWG9K01  | 471512 | 216412101 | Single Reads | 454 | ERX546798 |
| AWU | A | AWU_AORS_HOGWG9K02  | 623520 | 290152549 | Single Reads | 454 | ERX546765 |
| AWU | A | AWU_AORS_HOKMQ7201  | 415422 | 194219290 | Single Reads | 454 | ERX546804 |
| AWU | A | AWU_AORS_HOKMQ7202  | 415767 | 194112470 | Single Reads | 454 | ERX546810 |
| AWU | A | AWU_AORS_HOTXFWN01  | 573904 | 249396146 | Single Reads | 454 | ERX546789 |
| AWU | A | AWU_AORS_HOTXFWN02  | 616636 | 251440354 | Single Reads | 454 | ERX546797 |
| AWU | A | AWU_AORS_HOXJLF101  | 619309 | 271457362 | Single Reads | 454 | ERX546826 |
| AWU | A | AWU_AORS_HOXJLF102  | 589373 | 262356681 | Single Reads | 454 | ERX546833 |
| AWU | A | AWU_AORS_HP9GW5D01  | 616582 | 329032439 | Single Reads | 454 | ERX546796 |
| AWU | A | AWU_AORS_HPAKMIN01  | 604431 | 247521317 | Single Reads | 454 | ERX546808 |
| AWU | A | AWU_AORS_HPAKMIN02  | 599433 | 252223557 | Single Reads | 454 | ERX546799 |
| AWU | A | AWU_AORS_HPDXEDZ01  | 576140 | 267133896 | Single Reads | 454 | ERX546781 |
| AWU | A | AWU_AORS_HPDXEDZ02  | 604043 | 268649166 | Single Reads | 454 | ERX546786 |
| AWU | A | AWU_AORS_HPJN7LD01  | 627802 | 303967961 | Single Reads | 454 | ERX546856 |
| AWU | A | AWU_AORS_HPJN7LD02  | 632803 | 301178645 | Single Reads | 454 | ERX546780 |
| AWU | A | AWU_AORS_HPLH4SP01  | 574419 | 279919660 | Single Reads | 454 | ERX546839 |
| AWU | A | AWU_AORS_HPLH4SP02  | 541488 | 269140415 | Single Reads | 454 | ERX546763 |
| AWU | A | AWU_AORS_HPNIH9JK01 | 566545 | 277699403 | Single Reads | 454 | ERX546825 |
| AWU | A | AWU_AORS_HPNIH9JK02 | 542232 | 250634628 | Single Reads | 454 | ERX546835 |
| AWU | A | AWU_AORS_HPPEQTK01  | 509099 | 253840880 | Single Reads | 454 | ERX546755 |
| AWU | A | AWU_AORS_HPPEQTK02  | 397398 | 183638911 | Single Reads | 454 | ERX546776 |
| AWU | A | AWU_AORS_HPQ6PEM01  | 324214 | 140937382 | Single Reads | 454 | ERX546759 |

|     |   |                    |        |           |              |     |           |
|-----|---|--------------------|--------|-----------|--------------|-----|-----------|
| AWU | A | AWU_AORS_HPQ6PEM02 | 604340 | 258006924 | Single Reads | 454 | ERX546792 |
| AWU | A | AWU_AORS_HPWTB8401 | 632065 | 303346757 | Single Reads | 454 | ERX546782 |
| AWU | A | AWU_AORS_HPWTB8402 | 628856 | 283953031 | Single Reads | 454 | ERX546850 |
| AWU | A | AWU_AORS_HPYQNEV01 | 541025 | 254463651 | Single Reads | 454 | ERX546785 |
| AWU | A | AWU_AORS_HPYQNEV02 | 595941 | 281903473 | Single Reads | 454 | ERX546775 |
| AWU | A | AWU_AORS_HQ3AIIJ01 | 645852 | 273877444 | Single Reads | 454 | ERX546812 |
| AWU | A | AWU_AORS_HQ3AIIJ02 | 635565 | 261155309 | Single Reads | 454 | ERX546853 |
| AWU | A | AWU_AORS_HQ6XQKF01 | 602974 | 279814892 | Single Reads | 454 | ERX546854 |
| AWU | A | AWU_AORS_HQ6XQKF02 | 450682 | 192755614 | Single Reads | 454 | ERX546857 |
| AWU | A | AWU_AORS_HQBAEKW02 | 638393 | 315269575 | Single Reads | 454 | ERX546779 |
| AWU | A | AWU_AORS_HQC2HZF03 | 233986 | 110390642 | Single Reads | 454 | ERX546820 |
| AWU | A | AWU_AORS_HQC2HZF04 | 252397 | 132477279 | Single Reads | 454 | ERX546757 |
| AWU | A | AWU_AORS_HQC7JZG01 | 601648 | 292351551 | Single Reads | 454 | ERX546829 |
| AWU | A | AWU_AORS_HQC7JZG02 | 598632 | 280339696 | Single Reads | 454 | ERX546824 |
| AWU | A | AWU_AORS_HQE6HNV01 | 575033 | 294218540 | Single Reads | 454 | ERX546837 |
| AWU | A | AWU_AORS_HQE6HNV02 | 562072 | 276129568 | Single Reads | 454 | ERX546771 |
| AWU | A | AWU_AORS_HQG0JXZ01 | 605366 | 302641389 | Single Reads | 454 | ERX546843 |
| AWU | A | AWU_AORS_HQG0JXZ02 | 608598 | 289064135 | Single Reads | 454 | ERX546774 |
| AWU | A | AWU_AORS_HQR99NJ02 | 267774 | 134696910 | Single Reads | 454 | ERX546806 |
| AWU | A | AWU_AORS_HQR99NJ03 | 268450 | 136910337 | Single Reads | 454 | ERX546840 |
| AWU | A | AWU_AORS_HQR99NJ04 | 259009 | 128977810 | Single Reads | 454 | ERX546813 |
| AWU | A | AWU_AORS_HQVT54K01 | 670862 | 357817336 | Single Reads | 454 | ERX546767 |
| AWU | A | AWU_AORS_HQVT54K02 | 629420 | 327604262 | Single Reads | 454 | ERX546852 |
| AWU | A | AWU_AORS_HQXPWBU01 | 575053 | 311123919 | Single Reads | 454 | ERX546834 |

|     |   |                    |        |           |              |     |           |
|-----|---|--------------------|--------|-----------|--------------|-----|-----------|
| AWU | A | AWU_AORS_HQXPWBU02 | 592747 | 314220456 | Single Reads | 454 | ERX546814 |
| AWU | A | AWU_AORS_HR0B5WL01 | 476167 | 129297327 | Single Reads | 454 | ERX546762 |
| AWU | A | AWU_AORS_HR0B5WL02 | 522655 | 143434538 | Single Reads | 454 | ERX546832 |
| AWU | A | AWU_AORS_HR7Y0Z201 | 494273 | 151280248 | Single Reads | 454 | ERX546827 |
| AWU | A | AWU_AORS_HR7Y0Z202 | 451613 | 137776321 | Single Reads | 454 | ERX546773 |
| AWU | A | AWU_AORS_HRJY4EM01 | 583444 | 236195624 | Single Reads | 454 | ERX546772 |
| AWU | A | AWU_AORS_HRJY4EM02 | 507965 | 197165750 | Single Reads | 454 | ERX546805 |
| AWU | A | AWU_AORS_HRLT5NJ01 | 439153 | 146160122 | Single Reads | 454 | ERX546777 |
| AWU | A | AWU_AORS_HRLT5NJ02 | 400105 | 146048898 | Single Reads | 454 | ERX546822 |
| AWU | A | AWU_AORS_HRS9HCN01 | 472104 | 238860086 | Single Reads | 454 | ERX546802 |
| AWU | A | AWU_AORS_HRS9HCN02 | 540831 | 273328131 | Single Reads | 454 | ERX546800 |
| AWU | A | AWU_AORS_HRWNJ0F01 | 332429 | 137572971 | Single Reads | 454 | ERX546819 |
| AWU | A | AWU_AORS_HRWNJ0F02 | 483017 | 197840503 | Single Reads | 454 | ERX546836 |
| AWU | A | AWU_AORS_HRYGP8A01 | 593882 | 234911883 | Single Reads | 454 | ERX546764 |
| AWU | A | AWU_AORS_HRYGP8A02 | 568850 | 225739689 | Single Reads | 454 | ERX546809 |
| AWU | A | AWU_AORS_HS3NGS202 | 593496 | 271995164 | Single Reads | 454 | ERX546848 |
| AWU | A | AWU_AORS_HSBPWMC07 | 91079  | 36958456  | Single Reads | 454 | ERX546791 |
| AWU | A | AWU_AORS_HSBPWMC08 | 85328  | 34801846  | Single Reads | 454 | ERX546801 |
| AWU | A | AWU_AORS_HSDIBFO01 | 581079 | 282921477 | Single Reads | 454 | ERX546838 |
| AWU | A | AWU_AORS_HSDIBFO02 | 592838 | 266142240 | Single Reads | 454 | ERX546784 |
| AWU | A | AWU_AORS_HSFJ8MK01 | 607026 | 254366558 | Single Reads | 454 | ERR588819 |
| AWU | A | AWU_AORS_HSFJ8MK02 | 598573 | 217174740 | Single Reads | 454 | ERX546849 |
| AWU | A | AWU_AORS_HT2R6K001 | 616436 | 354909746 | Single Reads | 454 | ERX546818 |
| AWU | A | AWU_AORS_HTAXONP01 | 492955 | 227121584 | Single Reads | 454 | ERX546770 |

|     |   |                            |           |             |              |          |            |      |
|-----|---|----------------------------|-----------|-------------|--------------|----------|------------|------|
| AWU | A | AWU_AORS_HTAXONP02         | 605770    | 266418303   | Single Reads | 454      | ERX546844  |      |
| AWU | A | AWU_AORS_HTCPZFN01         | 586104    | 289733463   | Single Reads | 454      | ERX546788  |      |
| AWU | A | AWU_AORS_HTCPZFN02         | 620227    | 293411238   | Single Reads | 454      | ERX546807  |      |
| AWU | A | AWU_AORS_HTEFU8101         | 598533    | 239492636   | Single Reads | 454      | ERX546769  |      |
| AWU | A | AWU_AORS_HTEFU8102         | 622271    | 230573314   | Single Reads | 454      | ERX546841  |      |
| AWU | A | AWU_AORS_HTNM2OH02         | 602554    | 281689812   | Single Reads | 454      | ERX546830  |      |
| AWU | A | AWU_AORS_HTRLXNS01         | 618531    | 306184837   | Single Reads | 454      | ERX546811  |      |
| AWU | A | AWU_AORS_HTRLXNS02         | 614926    | 297895268   | Single Reads | 454      | ERX546754  |      |
| AWU | A | AWU_AORS_HTRQELM01         | 582923    | 257934536   | Single Reads | 454      | ERX546846  |      |
| AWU | A | AWU_AORS_HTRQELM02         | 619410    | 261141889   | Single Reads | 454      | ERX546768  |      |
| AWU | A | AWU_AORS_HTTFXII01         | 657236    | 291923817   | Single Reads | 454      | ERX546845  |      |
| AWU | A | AWU_AORS_HTTFXII02         | 642957    | 282417197   | Single Reads | 454      | ERX546761  |      |
| AWU | A | AWU_AORS_HTTJ7TZ01         | 592087    | 288519958   | Single Reads | 454      | ERX546831  |      |
| AWU | A | AWU_AORS_HTTJ7TZ02         | 594370    | 280348006   | Single Reads | 454      | ERX546758  |      |
| AWU | A | AWU_AORS_HTVBL6N01         | 660475    | 383854941   | Single Reads | 454      | ERX546823  |      |
| AWU | A | AWU_AORS_HTVBL6N02         | 634782    | 363284614   | Single Reads | 454      | ERX546815  |      |
| AWU | A | AWU_AORS_HTVFTYI02         | 664033    | 336384976   | Single Reads | 454      | ERX546790  |      |
| BBX | A | BBX_AOSW_1_D1D53ACXX.IND5  | 178225679 | 34704998557 | Paired-end   | Illumina | ERX697294  | 471x |
| BBX | A | BBX_AOSW_1_H32GMBBCXX.IND5 | 129340482 | 61406442546 | Paired-end   | Illumina | ERX1886616 |      |
| BBX | A | BBX_AOSW_1_H57N7BCXX.IND5  | 114968046 | 54158595214 | Paired-end   | Illumina | ERX1886621 |      |
| BBX | A | BBX_AOSW_2_H32GMBBCXX.IND5 | 132162999 | 63021298371 | Paired-end   | Illumina | ERX1886622 |      |
| BBX | B | BBX_BOSW_2_C1CRDACXX.IND6  | 185226443 | 36388653397 | Paired-end   | Illumina | ERX697299  |      |
| BBX | C | BBX_COSW_1_H072TAMXX.IND7  | 88896954  | 42521091728 | Paired-end   | Illumina | ERX697298  |      |
| BBX | C | BBX_COSW_2_D1D53ACXX.IND7  | 187527862 | 36107158449 | Paired-end   | Illumina | ERX697297  |      |

|     |    |                            |           |             |                        |          |            |    |
|-----|----|----------------------------|-----------|-------------|------------------------|----------|------------|----|
| BBX | C  | BBX_COSW_2_H072TAMXX.IND7  | 89768432  | 42909747910 | Paired-end             | Illumina | ERX697296  |    |
| BBX | C  | BBX_COSW_2_H57N7BCXX.IND7  | 141600651 | 66340720909 | Paired-end             | Illumina | ERX1886620 |    |
| BBX | D  | BBX_DOSW_3_C1CRDACXX.IND8  | 195620139 | 38283308256 | Paired-end             | Illumina | ERX697295  |    |
| BBX | E  | BBX_EOSW_1_H55MLBCXX.IND9  | 127908274 | 59324914635 | Paired-end             | Illumina | ERX1886617 |    |
| BBX | E  | BBX_EOSW_2_H32GLBCXX.IND9  | 134000800 | 55186245541 | Paired-end             | Illumina | ERX1886619 |    |
| BBX | E  | BBX_EOSW_2_H55MLBCXX.IND9  | 104846648 | 48165716278 | Paired-end             | Illumina | ERX1886618 |    |
| BBX | E  | BBX_EOSW_3_D1D53ACXX.IND9  | 185076013 | 35974428528 | Paired-end             | Illumina | ERX697292  |    |
| BBX | F  | BBX_FOSW_4_D1D53ACXX.IND10 | 173673937 | 33077225178 | Paired-end             | Illumina | ERX697293  |    |
| AWU | A2 | LR6000024-DNA_B02-LRAAD-01 | 96268     | 477206869   | TruSeq Synthetic Reads | Illumina | ERX1936767 | 6x |
| AWU | A2 | LR6000024-DNA_B02-LRAAD-02 | 97511     | 485762221   | TruSeq Synthetic Reads | Illumina | ERX1936768 |    |
| AWU | A2 | LR6000024-DNA_B02-LRAAD-03 | 99930     | 497943141   | TruSeq Synthetic Reads | Illumina | ERX1936769 |    |
| AWU | A2 | LR6000024-DNA_B02-LRAAD-04 | 96777     | 481729766   | TruSeq Synthetic Reads | Illumina | ERX1936770 |    |
| AWU | A2 | LR6000024-DNA_B02-LRAAD-05 | 99331     | 488240514   | TruSeq Synthetic Reads | Illumina | ERX1936771 |    |
| AWU | A2 | LR6000024-DNA_B02-LRAAD-06 | 133440    | 621932686   | TruSeq Synthetic Reads | Illumina | ERX1936772 |    |
| AWU | A2 | LR6000024-DNA_B02-LRAAD-07 | 212972    | 890601310   | TruSeq Synthetic Reads | Illumina | ERX1936773 |    |
| AWU | G1 | AWU_msDDZ                  | 166474    | 741066645   | TruSeq Synthetic Reads | Illumina | ERX1936761 |    |
| AWU | G1 | AWU_msDEA                  | 171897    | 734825556   | TruSeq Synthetic Reads | Illumina | ERX1936762 |    |
| AWU | G1 | AWU_msDED                  | 121611    | 589161920   | TruSeq Synthetic Reads | Illumina | ERX1936765 |    |
| AWU | G1 | AWU_msDEF                  | 124691    | 592617439   | TruSeq Synthetic Reads | Illumina | ERX1936766 |    |
| AWU | G1 | AWU_msDEB                  | 175574    | 750471312   | TruSeq Synthetic Reads | Illumina | ERX1936763 |    |
| AWU | G1 | AWU_msDEC                  | 167087    | 731676445   | TruSeq Synthetic Reads | Illumina | ERX1936764 |    |
| AWU | G1 | AWU-msDBX                  | 110436    | 530240247   | TruSeq Synthetic Reads | Illumina | ERX1936760 |    |

## RNAseq

|     |    |                             |          |             |                  |          |            |
|-----|----|-----------------------------|----------|-------------|------------------|----------|------------|
| AXF | AA | AXF_AAOSW_8_C0D1LACXX.IND2  | 59050722 | 11928245844 | Paired-end # RNA | Illumina | ERX332625  |
| AXF | BA | AXF_BAOSW_8_C0D1LACXX.IND4  | 63191029 | 12764587858 | Paired-end # RNA | Illumina | ERX332624  |
| AXF | CA | AXF_CAOSW_8_C0D1LACXX.IND5  | 68158203 | 13767957006 | Paired-end # RNA | Illumina | ERX332621  |
| AXF | DA | AXF_DAOSW_7_C0D1LACXX.IND6  | 72263408 | 14597208416 | Paired-end # RNA | Illumina | ERX332626  |
| AXF | EA | AXF_EAOSW_7_C0D1LACXX.IND7  | 57005112 | 11515032624 | Paired-end # RNA | Illumina | ERX332623  |
| AXF | FA | AXF_FAOSW_7_C0D1LACXX.IND12 | 65878896 | 13307536992 | Paired-end # RNA | Illumina | ERX332622  |
| BHC | AF | BHC_AFOSW_8_C4VAEACXX.IND12 | 29858750 | 5931520880  | Paired-end # RNA | Illumina | ERX1916513 |
| BHC | AG | BHC_AGOSW_7_C4VBLACXX.IND13 | 27938013 | 5587303314  | Paired-end # RNA | Illumina | ERX1916512 |
| BHC | BA | BHC_BAOSW_3_C4VR1ACXX.IND15 | 32668746 | 6486518369  | Paired-end # RNA | Illumina | ERX1796981 |
| BHC | BB | BHC_BBOSW_3_C4VR1ACXX.IND16 | 29920489 | 5929334824  | Paired-end # RNA | Illumina | ERX1796984 |
| BHC | BC | BHC_BCOSW_3_C4VR1ACXX.IND18 | 33368451 | 6625154612  | Paired-end # RNA | Illumina | ERX1796982 |
| BHC | BD | BHC_BDOSW_3_C4VR1ACXX.IND19 | 33982054 | 6753975751  | Paired-end # RNA | Illumina | ERX1796983 |
| BHD | AA | BHD_AAOSW_1_C3YEPACXX.IND1  | 29134976 | 5808377002  | Paired-end # RNA | Illumina | ERX1796974 |
| BHD | AB | BHD_ABOSW_1_C3YEPACXX.IND3  | 32355510 | 6448224478  | Paired-end # RNA | Illumina | ERX1796976 |
| BHD | AC | BHD_ACOSW_1_C3YEPACXX.IND8  | 43958162 | 8765695282  | Paired-end # RNA | Illumina | ERX1796975 |
| BHD | AK | BHD_AKOSW_2_C3YEPACXX.IND23 | 31082716 | 6204885589  | Paired-end # RNA | Illumina | ERX1916511 |
| BHD | AL | BHD_ALOSW_2_C3YEPACXX.IND25 | 27615039 | 5520361779  | Paired-end # RNA | Illumina | ERX1916509 |
| BHD | AM | BHD_AMOSW_2_C3YEPACXX.IND27 | 30157050 | 6022460185  | Paired-end # RNA | Illumina | ERX1916510 |
| BIG | G  | BIG_GOSW_5_C49VTACXX.IND7   | 27305012 | 5442125902  | Paired-end # RNA | Illumina | ERX1916514 |

1775 **Supplementary Table 2 Metrics of final haploid (haploid V2) and diploid (diploid V2)**  
 1776 **versions of the pedunculate oak genome sequence assembly.**

1777

|                                 | <b>Diploid V2</b><br><b>(Assembly A5<sup>a</sup>)</b> | <b>Haploid V2</b><br><b>(Assembly H1<sup>b</sup>)</b> |
|---------------------------------|-------------------------------------------------------|-------------------------------------------------------|
| <b>Assembly</b>                 | <b>Diploid</b>                                        | <b>Haploid</b>                                        |
| <b>No. of sequences</b>         | 8,827                                                 | 1,409                                                 |
| <b>Cumulative size</b>          | 1,455,104,916                                         | 814,282,569                                           |
| <b>N50</b>                      | 821,707                                               | 1,342,530                                             |
| <b>N90</b>                      | 198,501                                               | 333,129                                               |
| <b>L50</b>                      | 537                                                   | 192                                                   |
| <b>L90</b>                      | 1,880                                                 | 649                                                   |
| <b>% of N's</b>                 | 4.6                                                   | 2.94                                                  |
| <b>Completeness using BUSCO</b> | 210 (90.4%)                                           | 202 (90.8%)                                           |

1778 <sup>a</sup> from **Supplementary Table 10**

1779 <sup>b</sup> from **Supplementary Table 11**

1780

1781

1782 **Supplementary Table 3 Comparison of genome assemblies from available heterozygous trees. Best (green) and worst (red) assembly**  
 1783 **metrics, excluding *Populus trichocarpa*.**

| Species                    | Assembly availability                                                                                                                                     | # contigs | Cumulative size of contigs (Mb) | Contigs N50 size | # scaffolds | Cumulative size of scaffolds (Mb) | % of N | Scaffold N50 size | Busco %C    | Busco %D    |
|----------------------------|-----------------------------------------------------------------------------------------------------------------------------------------------------------|-----------|---------------------------------|------------------|-------------|-----------------------------------|--------|-------------------|-------------|-------------|
| <i>Olea europaea</i>       | <a href="http://denovo.cnag.cat/genomes/olive/download/Oe6/Oe6.scaffolds.fa.gz">http://denovo.cnag.cat/genomes/olive/download/Oe6/Oe6.scaffolds.fa.gz</a> | 38,053    | 1,265                           | 87,946           | 11,038      | 1,319                             | 4.09   | 443,100           | 277 (91.4%) | 126 (41.6%) |
| <i>Quercus robur</i>       | This study                                                                                                                                                | 22,615    | 790                             | 69,349           | 1,409       | 814                               | 2.94   | 1,342,530         | 269 (88.8%) | 49 (16.2%)  |
| <i>Betula pendula</i>      | <a href="https://genomeevolution.org/coge/api/v1/genomes/35079/sequence">https://genomeevolution.org/coge/api/v1/genomes/35079/sequence</a>               | 27,580    | 425                             | 49,342           | 5,642       | 435                               | 2.34   | 239,520           | 261 (86.1%) | 38 (12.5%)  |
| <i>Fraxinus excelsior</i>  | <a href="http://www.ashgenome.org/assemblies">http://www.ashgenome.org/assemblies</a>                                                                     | 119,515   | 718                             | 24,932           | 89,514      | 867                               | 17.19  | 103,995           | 272 (89.8%) | 97 (32.0%)  |
| <i>Castanea mollissima</i> | <a href="https://hardwoodgenomics.org/chinese-chestnut-genome#genomedownloads">https://hardwoodgenomics.org/chinese-chestnut-genome#genomedownloads</a>   | 70,867    | 710                             | 22,063           | 41,260      | 724                               | 1.86   | 39,561            | 264 (87.1%) | 50 (16.5%)  |
| <i>Quercus lobata</i>      | <a href="https://valleyoak.ucla.edu/genomicresources/">https://valleyoak.ucla.edu/genomicresources/</a>                                                   | 255,152   | 1,069                           | 17,576           | 94,394      | 1,183                             | 9.64   | 161,656           | 271 (89.4%) | 98 (32.3%)  |
| <i>Populus trichocarpa</i> | <a href="https://genomeevolution.org/coge/api/v1/genomes/25127/sequence">https://genomeevolution.org/coge/api/v1/genomes/25127/sequence</a>               | 8,313     | 423                             | 552,806          | 1,446       | 434                               | 2.57   | 19,465,461        | 279 (92.0%) | 108 (35.6%) |

1784

1785



1786 **Supplementary Table 4 Annotation of transposable elements.**

1787

1788

|                       |                        | # TE<br>consensus | # genome<br>copies | Genome<br>coverage<br>(kb) | Genome<br>coverage<br>% | TE<br>content<br>coverage<br>% |
|-----------------------|------------------------|-------------------|--------------------|----------------------------|-------------------------|--------------------------------|
| <b>Class I</b>        | <b>Copia</b>           | 211               | 89,447             | 87,215                     | 11.04                   | 20.71                          |
| <b>Retro-elements</b> | <b>Gypsy</b>           | 276               | 91,652             | 107,561                    | 13.61                   | 25.54                          |
|                       | <b>LTR</b>             | 80                | 38,726             | 29,058                     | 3.68                    | 6.90                           |
|                       | <b>LARD/TRIM/Other</b> |                   |                    |                            |                         |                                |
| <b>Class I</b>        | <b>LINE</b>            | 408               | 157,114            | 66,135                     | 8.37                    | 15.70                          |
| <b>Retro-elements</b> | <b>SINE</b>            | 30                | 4,571              | 1,216                      | 0.15                    | 0.29                           |
| <b>non-LTR</b>        |                        |                   |                    |                            |                         |                                |
| <b>Class I</b>        | <b>Other</b>           | 16                | 20,970             | 4,224                      | 0.53                    | 1.00                           |
|                       | <b>TIR</b>             | 313               | 141,489            | 52,207                     | 6.61                    | 12.39                          |
| <b>Class II</b>       | <b>MITE</b>            | 67                | 28,124             | 7,760                      | 0.98                    | 1.84                           |
| <b>DNA</b>            | <b>Helitron</b>        | 8                 | 3,642              | 2,006                      | 0.25                    | 0.48                           |
| <b>transposons</b>    | <b>Other</b>           | 11                | 2,987              | 2,012                      | 0.25                    | 0.48                           |
| <b>Unknown</b>        |                        | 317               | 134,652            | 54,428                     | 7.27                    | 13.63                          |
| <b>Endovirus</b>      |                        | 13                | 2,818              | 4,385                      | 0.55                    | 1.04                           |
| <b>Total</b>          |                        | 1,750             | 716,192            | 420,651                    | 53.30 <sup>a</sup>      | 100                            |

1811 <sup>a</sup> The total 53.3% of genome coverage reported here corresponds to the cumulative sum of coverage for the different orders/families.  
 1812 Total TE genome coverage is 52%, without redundancy between copies.

1813

1814

1815 **Supplementary Table 5 List of control SNPs (C) and somatic mutations (SMs) detected in the “3P” pedunculate oak accession. C:** control  
 1816 SNP, SM: somatic mutation, Mutation: reference /alternative (alt) allele, f(alt)pool: frequency of the alternative allele in the pool-seq data set.

| Mutation category | Locus ID          | Chromosomal location | Mutation | Origin of the mutation   | f(alt)pool | f(alt)pool >0.5% |
|-------------------|-------------------|----------------------|----------|--------------------------|------------|------------------|
| C                 | Sc0000093_652917  | Chr1-41939193        | T/A      | within species           | 0.9697     |                  |
| C                 | Sc0000158_1024005 | Chr2-27130279        | T/A      | within species           | 0.9637     |                  |
| C                 | Sc0000067_389965  | Chr3-27491298        | A/T      | within species           | 0.9534     |                  |
| C                 | Sc0000033_2516576 | Chr4-10285224        | A/C      | within species           | 0.9585     |                  |
| C                 | Sc0000505_233875  | Chr5-39212547        | T/G      | within species           | 0.9507     |                  |
| C                 | Sc0000170_1375115 | Chr6-36333647        | C/A      | within species           | 0.9542     |                  |
| C                 | Sc0000268_125122  | Chr7-23637407        | T/C      | within species           | 0.9605     |                  |
| C                 | Sc0000187_1162488 | Chr8-53746285        | T/C      | within species           | 0.9700     |                  |
| C                 | Sc0000168_672869  | Chr9-31527061        | C/T      | within species           | 0.9541     |                  |
| C                 | Sc0000447_97317   | Chr10-22125827       | A/G      | within species           | 0.9526     |                  |
| C                 | Sc0000099_1051673 | Chr11-7530106        | A/G      | within species           | 0.9679     |                  |
| C                 | Sc0000425_378736  | Chr12-27206974       | G/A      | within species           | 0.9691     |                  |
| SM                | Sc0000080_1329750 | Chr8-58757192        | G/A      | 3P – between XL1 and XL2 | 0.0330     | y                |
| SM                | Sc0000573_185294  | Chr7-21324198        | A/T      | 3P – between XL1 and XL2 | 0.0000     |                  |
| SM                | Sc0000010_1057132 | Chr3-13766752        | G/A      | 3P – between XL1 and XL2 | 0.1154     | y                |
| SM                | Sc0000003_4011526 | Chr2-84974261        | A/T      | 3P – between XL1 and XL2 | 0.0000     |                  |
| SM                | Sc0000010_758473  | Chr3-13468093        | G/A      | 3P – between XL1 and XL2 | 0.0000     |                  |
| SM                | Sc0000015_2644541 | Chr3-50836723        | G/T      | 3P – between XL1 and XL2 | 0.0000     |                  |
| SM                | Sc0000057_1996281 | Chr11-19272464       | C/T      | 3P – between XL1 and XL2 | 0.0000     |                  |
| SM                | Sc0000235_409999  | Chr12-5868120        | C/T      | 3P – between XL1 and XL2 | 0.1384     | y                |
| SM                | Sc0000122_532208  | Chr1-8511503         | C/T      | 3P – between XL1 and XL2 | 0.0000     |                  |
| SM                | Sc0000139_351870  | Chr1-28576871        | T/C      | 3P – between XL1 and XL2 | 0.0000     |                  |
| SM                | Sc0000233_840676  | Chr7-12397418        | G/A      | 3P – between XL1 and XL2 | 0.0000     |                  |
| SM                | Sc0000588_301268  | Chr4-27781193        | G/A      | 3P – between XL1 and XL2 | 0.0000     |                  |
| SM                | Sc0000065_545730  | Chr5-66436424        | T/C      | 3P – L1 branch           | 0.0000     |                  |
| SM                | Sc0000181_1118667 | Chr2-50905345        | C/T      | 3P – L1 branch           | 0.0782     | y                |
| SM                | Sc0000200_640712  | Chr5-54088853        | G/A      | 3P – L1 branch           | 0.0000     |                  |
| SM                | Sc0000667_35498   | Chr1-10565982        | G/A      | 3P – L1 branch           | 0.0133     | y                |
| SM                | Sc0000444_256472  | Chr3-25184616        | C/T      | 3P – L1 branch           | 0.0049     |                  |

|    |                   |                     |     |                          |        |   |
|----|-------------------|---------------------|-----|--------------------------|--------|---|
| SM | Sc0000277_447345  | Chr2-113550344      | T/C | 3P – L1 branch           | 0.0000 |   |
| SM | Sc0000135_631742  | Chr7-25169846       | T/C | 3P – L1 branch           | 0.0000 |   |
| SM | Sc0000001_4448299 | Chr6-48948241       | T/G | 3P – L1 branch           | 0.0000 |   |
| SM | Sc0000219_286289  | Chr2-49724208       | A/T | 3P – L1 branch           | 0.0000 |   |
| SM | Sc0000395_657452  | Chr8-17311448       | G/T | 3P – L1 branch           | 0.0000 |   |
| SM | Sc0000099_1809337 | Chr11-6772442       | C/T | 3P – L2 branch           | 0.0078 | y |
| SM | Sc0000035_1061781 | Chr1-32821443       | C/T | 3P – L2 branch           | 0.0043 |   |
| SM | Sc0000066_1207928 | Chr2-22466474       | G/A | 3P – L2 branch           | 0.0000 |   |
| SM | Sc0000103_228814  | unanchored scaffold | C/T | 3P – L2 branch           | 0.0000 |   |
| SM | Sc0000578_47594   | Chr2-70260112       | C/T | 3P – L2 branch           | 0.0000 |   |
| SM | Sc0000031_1042378 | Chr9_36922447       | C/T | 3P – between XL1 and XL2 | 0.0035 |   |
| SM | Sc0000114_1570819 | Chr4_39071460       | A/G | 3P – between XL1 and XL2 | 0.0000 |   |
| SM | Sc0000114_960640  | Chr4_39681639       | G/A | 3P – between XL1 and XL2 | 0.0030 |   |
| SM | Sc0000146_1249018 | Chr12_26296592      | C/T | 3P – between XL1 and XL2 | 0.0000 |   |
| SM | Sc0000975_67191   | Chr2_23741692       | T/C | 3P – between XL1 and XL2 | 0.0000 |   |
| SM | Sc0000000_3201322 | Chr1_23876533       | G/A | 3P – L1 branch           | 0.0000 |   |
| SM | Sc0000041_558993  | Chr1_2895035        | G/A | 3P – L1 branch           | 0.0935 | y |
| SM | Sc0000228_252981  | Chr5_34619071       | C/T | 3P – L1 branch           | 0.0000 |   |
| SM | Sc0000277_395519  | Chr2_113498518      | G/A | 3P – L1 branch           | 0.0608 | y |
| SM | Sc0000570_213658  | Chr8_40730574       | C/T | 3P – L1 branch           | 0.0244 | y |
| SM | Sc0001123_18450   | unanchored scaffold | G/A | 3P – L1 branch           | 0.0270 | y |
| SM | Sc0000002_4278465 | Chr2_66564257       | T/A | 3P – L2 branch           | 0.0000 |   |
| SM | Sc0000005_165035  | Chr11_33010956      | T/G | 3P – L2 branch           | 0.0000 |   |
| SM | Sc0000242_170918  | Chr2_55024334       | C/T | 3P – L2 branch           | 0.0000 |   |
| SM | Sc0000312_31989   | Chr6_28492838       | A/T | 3P – L2 branch           | 0.0000 |   |
| SM | Sc0000584_280071  | unanchored scaffold | A/T | 3P – L2 branch           | 0.3152 | y |
| SM | Sc0000026_779464  | unanchored scaffold | G/A | 3P – between XL2 and L3  | 0.0359 | y |
| SM | Sc0000027_691249  | Chr2_98491575       | A/G | 3P – between XL2 and L3  | 0.0000 |   |
| SM | Sc0000042_876919  | Chr4_19144163       | T/A | 3P – between XL2 and L3  | 0.0000 |   |
| SM | Sc0000051_786541  | Chr2_30320278       | C/T | 3P – between XL2 and L3  | 0.0000 |   |
| SM | Sc0000056_626880  | Chr5_18059797       | C/T | 3P – between XL2 and L3  | 0.0690 | y |
| SM | Sc0000085_693443  | Chr10_14911573      | C/T | 3P – between XL2 and L3  | 0.0140 | y |
| SM | Sc0000097_1855202 | Chr9_47939472       | C/T | 3P – between XL2 and L3  | 0.0000 |   |
| SM | Sc0000108_1664655 | Chr10_27649124      | C/T | 3P – between XL2 and L3  | 0.0000 |   |

|    |                   |                     |     |                         |        |   |
|----|-------------------|---------------------|-----|-------------------------|--------|---|
| SM | Sc0000132_1066473 | unanchored scaffold | T/A | 3P – between XL2 and L3 | 0.0000 |   |
| SM | Sc0000167_777615  | Chr2_81379058       | T/C | 3P – between XL2 and L3 | 0.0029 |   |
| SM | Sc0000170_850309  | Chr6_35808841       | G/T | 3P – between XL2 and L3 | 0.0000 |   |
| SM | Sc0000210_857733  | Chr12_35930326      | C/T | 3P – between XL2 and L3 | 0.0000 |   |
| SM | Sc0000227_150153  | Chr10_8928796       | G/A | 3P – between XL2 and L3 | 0.0000 |   |
| SM | Sc0000266_244617  | Chr11_43001996      | G/A | 3P – between XL2 and L3 | 0.0000 |   |
| SM | Sc0000266_72243   | Chr11_43174370      | A/C | 3P – between XL2 and L3 | 0.0000 |   |
| SM | Sc0000274_597070  | Chr2_35105614       | G/A | 3P – between XL2 and L3 | 0.0305 | y |
| SM | Sc0000300_540958  | Chr5_55161003       | C/T | 3P – between XL2 and L3 | 0.0000 |   |
| SM | Sc0000620_260076  | Chr11_26408896      | C/T | 3P – between XL2 and L3 | 0.0028 |   |

1817

1818

1819 **Supplementary Table 6 List of control SNPs (C) and somatic mutations (SMs) in the offspring of accession “3P”.** Acorns of the reference  
 1820 genotype “3P” were collected from the L1 and L2 branches indicated in **Fig. 2b**. C: control SNP, SM somatic mutation, N: sample size with  
 1821 accurate genotypic information, H0: observed heterozygosity. f(pool): frequency of the alternative allele. A value of 0 in this last column  
 1822 indicates a mutation detected only in the reference “3P” genotype and transmitted to its offspring.

1823

| SNP Category | Locus ID          | Origin of the mutation   | Success of the assay | % missing data | N   | H0    | f(pool) |
|--------------|-------------------|--------------------------|----------------------|----------------|-----|-------|---------|
| C            | Chr1-41939193     | within species           | Y                    | 0.440          | 65  | 0.400 | 0.9697  |
| C            | Chr2-27130279     | within species           | Y                    | 0.853          | 17  | 0.588 | 0.9637  |
| C            | Chr3-27491298     | within species           | Y                    | 0.276          | 84  | 0.595 | 0.9534  |
| C            | Chr4-10285224     | within species           | Y                    | 0.819          | 21  | 0.619 | 0.9545  |
| C            | Chr5-39212547     | within species           | Y                    | 0.466          | 62  | 0.306 | 0.9507  |
| C            | Chr6-36333647     | within species           | Y                    | 0.905          | 11  | 0.455 | 0.9542  |
| C            | Chr7-23637407     | within species           | Y                    | 0.138          | 100 | 0.820 | 0.9605  |
| C            | Chr8-53746285     | within species           | Y                    | 0.259          | 86  | 0.814 | 0.9700  |
| C            | Chr9-31527061     | within species           | Y                    | 0.198          | 93  | 0.215 | 0.9541  |
| C            | Chr10-22125827    | within species           | Y                    | 0.888          | 13  | 0.231 | 0.9526  |
| C            | Chr11-7530106     | within species           | Y                    | 0.914          | 10  | 0.600 | 0.9679  |
| C            | Chr12-27206974    | within species           | Y                    | 0.172          | 96  | 0.875 | 0.9691  |
| SM           | Sc0000573_185294  | 3P – between XL1 and XL2 | Y                    | 0.172          | 96  | 0.000 | 0.000   |
| SM           | Sc0000003_4011526 | 3P – between XL1 and XL2 | Y                    | 0.284          | 83  | 0.084 | 0.000   |
| SM           | Sc0000010_758473  | 3P – between XL1 and XL2 | Y                    | 0.233          | 89  | 0.124 | 0.000   |
| SM           | Sc0000015_2644541 | 3P – between XL1 and XL2 | Y                    | 0.595          | 47  | 0.191 | 0.000   |
| SM           | Sc0000057_1996281 | 3P – between XL1 and XL2 | Y                    | 0.491          | 59  | 0.288 | 0.000   |
| SM           | Sc0000122_532208  | 3P – between XL1 and XL2 | Y                    | 0.871          | 15  | 0.000 | 0.000   |
| SM           | Sc0000139_351870  | 3P – between XL1 and XL2 | Y                    | 0.198          | 93  | 0.000 | 0.000   |
| SM           | Sc0000233_840676  | 3P – between XL1 and XL2 | Y                    | 0.026          | 113 | 0.000 | 0.000   |
| SM           | Sc0000588_301268  | 3P – between XL1 and XL2 | Y                    | 0.267          | 85  | 0.000 | 0.000   |
| SM           | Sc0000065_545730  | 3P – L1 branch           | Y                    | 0.836          | 19  | 0.000 | 0.000   |

---

|    |                   |                |   |       |     |       |       |
|----|-------------------|----------------|---|-------|-----|-------|-------|
| SM | Sc0000200_640712  | 3P – L1 branch | Y | 0.069 | 108 | 0.111 | 0.000 |
| SM | Sc0000444_256472  | 3P – L1 branch | Y | 0.034 | 112 | 0.018 | 0.005 |
| SM | Sc0000277_447345  | 3P – L1 branch | Y | 0.690 | 36  | 0.111 | 0.000 |
| SM | Sc0000135_631742  | 3P – L1 branch | Y | 0.595 | 47  | 0.000 | 0.000 |
| SM | Sc0000001_4448299 | 3P – L1 branch | Y | 0.629 | 43  | 0.000 | 0.000 |
| SM | Sc0000219_286289  | 3P – L1 branch | N | NA    | 0   | NA    | 0.000 |
| SM | Sc0000395_657452  | 3P – L1 branch | N | NA    | 0   | NA    | 0.000 |
| SM | Sc0000035_1061781 | 3P – L2 branch | Y | 0.276 | 84  | 0.000 | 0.004 |
| SM | Sc0000066_1207928 | 3P – L2 branch | Y | 0.190 | 94  | 0.000 | 0.000 |
| SM | Sc0000103_228814  | 3P – L2 branch | Y | 0.897 | 12  | 0.000 | 0.000 |
| SM | Sc0000578_47594   | 3P – L2 branch | Y | 0.026 | 113 | 0.000 | 0.000 |

---

1824 **Supplementary Table 7 Result of the OrthoMCL analysis and comparison between the 16 eudicot species used in this study.**

| Species acronym*    | #genes         | #orthogroups  | #genes in orthogroups | #singletons    | % Genes in orthogroups | #genes shared with at least one other species | %genes shared with at least one other species | #species specific orthogroups | #genes in species specific orthogroups |
|---------------------|----------------|---------------|-----------------------|----------------|------------------------|-----------------------------------------------|-----------------------------------------------|-------------------------------|----------------------------------------|
| <i>Al</i>           | 32,657         | 17,186        | 27,260                | 5,397          | 0.83                   | 24,449                                        | 0.75                                          | 813                           | 2,811                                  |
| <i>At</i>           | 27,416         | 16,716        | 24,733                | 2,683          | 0.90                   | 24,334                                        | 0.89                                          | 141                           | 399                                    |
| <i>Wa</i>           | 23,440         | 12,775        | 20,192                | 3,248          | 0.86                   | 17,402                                        | 0.74                                          | 364                           | 2,790                                  |
| <i>Fv</i>           | 32,831         | 14,304        | 25,093                | 7,738          | 0.76                   | 19,953                                        | 0.61                                          | 1,275                         | 5,140                                  |
| <i>Gm</i>           | 56,044         | 15,235        | 46,400                | 9,644          | 0.83                   | 41,978                                        | 0.75                                          | 1,552                         | 4,422                                  |
| <i>Rc</i>           | 31,220         | 14,658        | 21,088                | 10,132         | 0.68                   | 18,913                                        | 0.61                                          | 754                           | 2,175                                  |
| <i>St</i>           | 35,119         | 13,041        | 28,897                | 6,222          | 0.82                   | 21,825                                        | 0.62                                          | 1,060                         | 7,072                                  |
| <i>Cp</i>           | 27,584         | 13,483        | 20,285                | 7,299          | 0.74                   | 18,334                                        | 0.66                                          | 520                           | 1,951                                  |
| <i>Cc</i>           | 24,533         | 13,916        | 21,425                | 3,108          | 0.87                   | 20,497                                        | 0.84                                          | 316                           | 928                                    |
| <i>Eg</i>           | 36,376         | 13,615        | 29,063                | 7,313          | 0.80                   | 26,402                                        | 0.73                                          | 722                           | 2,661                                  |
| <i>Md</i>           | 63,514         | 17,217        | 46,524                | 16,990         | 0.73                   | 37,225                                        | 0.59                                          | 3,324                         | 9,299                                  |
| <i>Pt</i>           | 41,335         | 14,921        | 33,604                | 7,731          | 0.81                   | 31,412                                        | 0.76                                          | 728                           | 2,192                                  |
| <i>Pp</i>           | 27,864         | 14,545        | 24,651                | 3,213          | 0.88                   | 23,230                                        | 0.83                                          | 311                           | 1,421                                  |
| <b><i>Qr</i></b>    | <b>25,808</b>  | <b>11,813</b> | <b>22,498</b>         | <b>3,310</b>   | <b>0.87</b>            | <b>20,761</b>                                 | <b>0.80</b>                                   | <b>479</b>                    | <b>1,737</b>                           |
| <i>Tc</i>           | 29,452         | 14,591        | 23,608                | 5,844          | 0.8                    | 21,722                                        | 0.74                                          | 465                           | 1,886                                  |
| <i>Vv</i>           | 26,346         | 12,951        | 19,774                | 6,572          | 0.75                   | 18,135                                        | 0.69                                          | 589                           | 1,639                                  |
| <b>Total #genes</b> | <b>541,539</b> |               | <b>435,095</b>        | <b>106,444</b> |                        | <b>386,572</b>                                |                                               |                               | <b>48,523</b>                          |

1825 \* *Al* *Arabidopsis lyrata*, *At* *Arabidopsis thaliana*, *Wa* *Citrullus lanatus*, *Fv* *Fragaria vesca*, *Gm* *Glycine max*, *Rc* *Ricinus communis*, *St* *Solanum tuberosum*, *Cp* *Carica papaya*, *Cc* *Citrus climentina*, *Eg*  
1826 *Eucalyptus grandis*, *Md* *Malus domestica*, *Pt* *Populus trichocarpa*, *Pp* *Prunus persica*, *Qr* *Quercus robur*, *Tc* *Theobroma cacao*, *Vv* *Vitis vinifera*.

1827 **Supplementary Table 8 Repertoire of NB-LRR-related disease resistance genes in oak.**  
 1828 **Genes are classified in different categories according** to the presence of the canonical NB-  
 1829 ARC (NB), leucine-rich repeat (LRR) domains and/or the N-terminal domains typically  
 1830 associated with disease resistance NB-LRR genes in plant genomes, namely Toll interleukin  
 1831 receptor-like (TIR), coiled-coil (CC) and resistance to powdery mildew protein RPW8 (R)  
 1832 domains. X indicates the presence of a putative integrated domain (ID).

1833

| Category                | Acronym        | Total        | Integrated domains |
|-------------------------|----------------|--------------|--------------------|
|                         |                |              | (X)                |
| CC-NB-LRR (X)           | CNL            | 258          | 16                 |
| CC-NB (X)               | CN             | 47           | 3                  |
| CC-LRR                  | CL             | 3            |                    |
| CC (X)                  | C              | 14           | 1                  |
| <i>NB-LRR-CC-NB-LRR</i> | <i>NLCNL</i>   | <i>1</i>     |                    |
| <i>CC(3x)-NB-LRR</i>    | <i>C(3x)NL</i> | <i>1</i>     |                    |
| RPW8-NB-LRR (X)         | RNL            | 15           | 3                  |
| RPW8                    | R              | 1            |                    |
| TIR-NB-LRR (X)          | TNL            | 186          | 11                 |
| TIR-NB (X)              | TN             | 25           | 3                  |
| TIR-LRR (X)             | TL             | 3            | 1                  |
| TIR                     | T              | 151          |                    |
| NB-LRR (X)              | NL             | 240          | 11                 |
| NB (X)                  | N              | 61           | 4                  |
| LRR (X)                 | L              | 85           | 1                  |
| <b>Total</b>            |                | <b>1,091</b> | <b>54</b>          |

1834

1835



1836 **Supplementary Table 9 Genetic diversity ( $\pi$ ) at 0-fold, 4-fold degeneracy and  $\pi_0/\pi_4$  ratio.**  
 1837 **Estimates were averaged over 1,000** randomly picked genes in each category and repeated  
 1838 100 times. Mean and 95% confidence intervals (in parentheses) are reported. Values should  
 1839 be multiplied by  $10^{-3}$ .

1840

|                             | <b>Total</b>      | <b>Expanded</b>   | <b>Contracted</b> | <b>Unchanged</b>  |
|-----------------------------|-------------------|-------------------|-------------------|-------------------|
| <b>“3P” Genome sequence</b> |                   |                   |                   |                   |
| $\pi_0$                     | 5.0 (4.6, 5.5)    | 7.0 (6.6, 7.4)    | 3.2 (3.0, 3.4)    | 3.2 (3.0, 3.5)    |
| $\pi_4$                     | 11.4 (10.6, 12)   | 12.5 (11.7, 13.3) | 10.8 (10.2, 11.4) | 10 (9.2, 10.9)    |
| $\pi_0/\pi_4$               | 0.44 (0.39, 0.49) | 0.56 (0.52, 0.61) | 0.3 (0.27, 0.32)  | 0.32 (0.29, 0.37) |
| <b>Pool-sequencing</b>      |                   |                   |                   |                   |
| $\pi_0$                     | 5.4 (5.0, 5.7)    | 7.6 (7.2, 7.9)    | 2.9 (2.7, 3.0)    | 3 (2.8, 3.2)      |
| $\pi_4$                     | 10.8 (10.3, 11.3) | 12.5 (12.0, 13.0) | 9.5 (9.2, 9.9)    | 9.3 (8.9, 9.8)    |
| $\pi_0/\pi_4$               | 0.5 (0.46, 0.53)  | 0.6 (0.57, 0.65)  | 0.3 (0.28, 0.32)  | 0.32 (0.3, 0.34)  |

1841

1842

1843

1844 **Supplementary Table 10 Metrics of the pedunculate oak assembly at each step of the**  
 1845 **Newbler process.**

1846

|                 | <b>Newbler A1</b> | <b>Newbler A2</b>    | <b>Newbler A3</b> | <b>Newbler A4</b> | <b>Newbler A5</b>     |
|-----------------|-------------------|----------------------|-------------------|-------------------|-----------------------|
| Assembly step   | Raw output        | Graph simplification | Scaffolding       | Gap closing       | Contamination removal |
| # sequences     | 296,255           | 198,695              | 9,025             | 9,025             | 8,827                 |
| Cumulative size | 1,313,577,586     | 1,330,866,990        | 1,455,541,024     | 1,458,028,538     | 1,455,104,916         |
| N50             | 9,499             | 16,207               | 818,147           | 821,283           | 821,707               |
| N90             | 1,800             | 3,322                | 538               | 194,343           | 198,501               |
| L50             | 38,579            | 23,591               | 193,405           | 7538              | 537                   |
| L90             | 158,717           | 89,893               | 1,892             | 1,893             | 1,880                 |
| % of N's        | 0                 | 1.3                  | 11.19             | 4.63              | 4.6                   |

1847

1848

1849 **Supplementary Table 11 Metrics of pedunculate oak assembly at each step of the Celera**  
1850 **process.**

1851

---

|                  | <b>Celera C1</b> | <b>Celera C2</b> |
|------------------|------------------|------------------|
| Assembly step    | Raw output       | Scaffolding      |
| No. of sequences | 296,255          | 14,088           |
| Cumulative size  | 1,313,577,586    | 1,273,117,594    |
| N50              | 9,499            | 266,385          |
| N90              | 1,800            | 55,257           |
| L50              | 38,579           | 1,418            |
| L90              | 158,717          | 5,257            |
| % of N's         | 0                | 9.24             |

---

1852

1853

1854 **Supplementary Table 12 Structural manual curation of mRNAs indicating the type of**  
 1855 **protein coding structure (CDS) curation.**

1856

|                                                                                                                                                                 |                                         |
|-----------------------------------------------------------------------------------------------------------------------------------------------------------------|-----------------------------------------|
| <b>Total annotated mRNA in the v1 diploid assembly</b>                                                                                                          | <b>1,714 genes</b>                      |
| <b>Validation without CDS curation</b>                                                                                                                          | 1,347 (79%)                             |
| <b>Validation with CDS curation</b>                                                                                                                             | 367 (21%)                               |
| <ul style="list-style-type: none"> <li>• Exon (donor/acceptor,start/stop)</li> <li>• Gene merge</li> <li>• Gene split</li> <li>• Other not specified</li> </ul> | <p>233</p> <p>93</p> <p>0</p> <p>41</p> |

1857

1858

1859 **Supplementary Table 13 Description of the RNAseq libraries used to annotate non-**  
 1860 **coding RNA.**

1861

| RNAseq library file        | Tissues/environmental conditions                                                                                                            | NCBI accessions |
|----------------------------|---------------------------------------------------------------------------------------------------------------------------------------------|-----------------|
| AXF_AAOSW_8_1.fastq.gz     | Ecodormant buds harvested from two adult trees in 2005 (2005.12.01)                                                                         | ERP004204       |
| AXF_AAOSW_8_2.fastq.gz     |                                                                                                                                             |                 |
| AXF_BAOSW_8_1.fastq.gz     | Swelling buds harvested from two adult trees in 2006 (2006.24.03)                                                                           | ERP004204       |
| AXF_BAOSW_8_2.fastq.gz     |                                                                                                                                             |                 |
| AXF_CAOSW_8_1.fastq.gz     | Differentiating xylem sampled in April 2004 from adult trees.                                                                               | ERP004204       |
| AXF_CAOSW_8_2.fastq.gz     |                                                                                                                                             |                 |
| AXF_DAOSW_7_1.fastq.gz     | Roots harvested from 6-month-old seedlings after exposure to cold, heat, high CO <sub>2</sub> concentration, water stress and hypoxia.      | ERP004204       |
| AXF_DAOSW_7_2.fastq.gz     |                                                                                                                                             |                 |
| AXF_EAOSW_7_1.fastq.gz     | Leaves harvested on 6 month old seedlings after exposure to cold, heat, high CO <sub>2</sub> concentration, water stress and hypoxia.       | ERP004204       |
| AXF_EAOSW_7_2.fastq.gz     |                                                                                                                                             |                 |
| AXF_FAOSW_7_1.fastq.gz     | Dedifferentiated <i>in vitro</i> callus from genotype # DF 159                                                                              | ERP004204       |
| AXF_FAOSW_7_2.fastq.gz     |                                                                                                                                             |                 |
| BHD_AAOSW_1_1.fastq.gz     | White roots harvested from five-week-old sessile oak seedlings. Pool of 10 seedlings.                                                       | ERA763633       |
| BHD_AAOSW_1_2.fastq.gz     |                                                                                                                                             |                 |
| BHD_ABOSW_1_1.fastq.gz     | White roots harvested from five-week-old sessile oak seedlings. Pool of 10 seedlings.                                                       | ERA763633       |
| BHD_ABOSW_1_2.fastq.gz     |                                                                                                                                             |                 |
| BHD_ACOSW_1_1.fastq.gz     | White roots harvested from five-week-old sessile oak seedlings. Pool of 10 seedlings.                                                       | ERA763633       |
| BHD_ACOSW_1_2.fastq.gz     |                                                                                                                                             |                 |
| BHC_BAOSW_3_1_C4VR1ACXX.IN | Endodormant buds (sampled Oct. 2 <sup>nd</sup> 2013: pool of 5 sessile oak genotypes from the Laveyron population in the Pyrenees)          | ERA763635       |
| D15_noribo_clean.fastq.gz  |                                                                                                                                             |                 |
| BHC_BAOSW_3_2_C4VR1ACXX.IN |                                                                                                                                             |                 |
| BHC_BBOSW_3_1_C4VR1ACXX.IN | Endodormant buds : (sampled Oct. 2 <sup>nd</sup> 2013: pool of 5 other sessile oak genotypes from the Laveyron population in the Pyrenees)  | ERA763635       |
| D16_noribo_clean.fastq.gz  |                                                                                                                                             |                 |
| BHC_BBOSW_3_2_C4VR1ACXX.IN |                                                                                                                                             |                 |
| BHC_BCOSW_3_1_C4VR1ACXX.IN | Ecodormant buds : (sampled March 10 <sup>th</sup> 2014: pool of 5 sessile oak genotypes from the Laveyron population in the Pyrenees)       | ERA763635       |
| D18_noribo_clean.fastq.gz  |                                                                                                                                             |                 |
| BHC_BCOSW_3_2_C4VR1ACXX.IN |                                                                                                                                             |                 |
| BHC_BDOSW_3_1_C4VR1ACXX.IN | Ecodormant buds : (sampled March 10 <sup>th</sup> 2014: pool of 5 other sessile oak genotypes from the Laveyron population in the Pyrenees) | ERA763635       |
| D19_noribo_clean.fastq.gz  |                                                                                                                                             |                 |
| BHC_BDOSW_3_2_C4VR1ACXX.IN |                                                                                                                                             |                 |
| D19_noribo_clean.fastq.gz  |                                                                                                                                             |                 |

1862

1863 **Supplementary Table 14 Description of the miRNAseq libraries used to identify and**  
 1864 **validate miRNAs** (NCBI bioproject accession: PRJNA361225).

1865

| <b>miRNAseq library file (2 replicates)</b>          | <b>Elevation (m)</b> | <b>Location/ valley/sampling date</b>       | <b>Sample type</b> | <b>Bud dormancy stage /genotypes pooled for library construction</b> | <b>NCBI accessions</b>   |
|------------------------------------------------------|----------------------|---------------------------------------------|--------------------|----------------------------------------------------------------------|--------------------------|
| <b>A1-Endo.fastq.gz</b><br><b>A2-Endo.fastq.gz</b>   | 1,600                | Artouste/<br>Ossau/Oct. 7th 2013            | Endodormancy       | A1<br>A2                                                             | SRR5181470<br>SRR5181469 |
| <b>A1-Eco.fastq.gz</b><br><b>A2-Eco.fastq.gz</b>     | 1,600                | Artouste/<br>Ossau/April 7th 2014           | Ecodormancy        | A1<br>A2                                                             | SRR5181464<br>SRR5181463 |
| <b>LH1-Endo.fastq.gz</b><br><b>LH2-Endo.fastq.gz</b> | 800                  | Le Hourque/<br>Ossau/ Oct. 6th 2013         | Endodormancy       | LH1<br>LH2                                                           | SRR5181472<br>SRR5181471 |
| <b>LH1-Eco.fastq.gz</b><br><b>LH2-Eco.fastq.gz</b>   | 800                  | Le Hourque/<br>Ossau/ March 16th 2014       | Ecodormancy        | LH1<br>LH2                                                           | SRR5181466<br>SRR5181465 |
| <b>J1-Endo.fastq.gz</b><br><b>J2-Endo.fastq.gz</b>   | 100                  | Josbaig/<br>Ossau/ Oct. 5th 2013            | Endodormancy       | J1<br>J2                                                             | SRR5181474<br>SRR5181473 |
| <b>J1-Eco.fastq.gz</b><br><b>J2-Eco.fastq.gz</b>     | 100                  | Josbaig/<br>Ossau/ March 10th 2014          | Ecodormancy        | J1<br>J2                                                             | SRR5181468<br>SRR5181467 |
| <b>PR1-Endo.fastq.gz</b><br><b>PR2-Endo.fastq.gz</b> | 1,600                | Péguère/<br>Luz/ Oct. 4th 2013              | Endodormancy       | PR1<br>PR2                                                           | SRR5181458<br>SRR5181457 |
| <b>PR1-Eco.fastq.gz</b><br><b>PR2-Eco.fastq.gz</b>   | 1,600                | Péguère/<br>Luz/April 8th 2014              | Ecodormancy        | PR1<br>PR2                                                           | SRR5181452<br>SRR5181451 |
| <b>P1-Endo.fastq.gz</b><br><b>P2-Endo.fastq.gz</b>   | 800                  | Papillon/<br>Luz/ Oct. 3rd 2013             | Endodormancy       | P1<br>P2                                                             | SRR5181460<br>SRR5181459 |
| <b>P1-Eco.fastq.gz</b><br><b>P2-Eco.fastq.gz</b>     | 800                  | Papillon/<br>Luz/March 17th 2014            | Ecodormancy        | P1<br>P2                                                             | SRR5181454<br>SRR5181453 |
| <b>L1-Endo.fastq.gz</b><br><b>L2-Endo.fastq.gz</b>   | 100                  | Laveyron/<br>Luz/ Oct. 2 <sup>nd</sup> 2013 | Endodormancy       | L1<br>L2                                                             | SRR5181462<br>SRR5181461 |
| <b>L1-Eco.fastq.gz</b><br><b>L2-Eco.fastq.gz</b>     | 100                  | Laveyron/<br>Luz/March 13th 2014            | Ecodormancy        | L1<br>L2                                                             | SRR5181456<br>SRR5181455 |

1866

1867

1868 **Supplementary Table 15 Number of predicted and annotated ncRNA loci.**

1869

| Family/sub-family | Software                                         |                              |                          | #Unique        |
|-------------------|--------------------------------------------------|------------------------------|--------------------------|----------------|
| <b>rRNA</b>       | <b>#RNAmmer predictions</b>                      | <b>#cmsearch predictions</b> | <b>#Overlapping loci</b> | <b>#Unique</b> |
| <b>rRNA</b>       |                                                  |                              |                          | <b>136</b>     |
| 5S                | 49                                               | 65                           | 44                       | 70             |
| LSU/5.8S          | 13                                               | 14                           | 7                        | 22             |
| SSU               | 20                                               | 52                           | 20                       | 44             |
| <b>tRNA</b>       | <b>#tRNAscan-SE predictions</b>                  | <b>#cmsearch predictions</b> | <b>#Overlapping loci</b> |                |
| <b>tRNA</b>       | 827                                              | 815                          | 790                      | 852            |
| <b>miRNA</b>      | <b>#sRNA-PIAn predictions annotated as miRNA</b> | <b>#cmsearch predictions</b> | <b>#Overlapping loci</b> |                |
| <b>miRNA</b>      | 1508                                             | 204                          | 59                       | 1594           |
| <b>Others</b>     | -                                                | <b>#cmsearch predictions</b> |                          |                |
| <b>SnoRNA</b>     |                                                  |                              |                          | <b>486</b>     |
| C/D               | -                                                | 412                          | -                        | 412            |
| H/ACA             | -                                                | 74                           | -                        | 74             |
| <b>SnRNA</b>      | -                                                |                              | -                        | <b>225</b>     |
| U1                | -                                                | 34                           | -                        | 34             |
| U11               | -                                                | 1                            | -                        | 1              |
| U2                | -                                                | 55                           | -                        | 55             |
| U12               | -                                                | 1                            | -                        | 1              |
| U4                | -                                                | 33                           | -                        | 33             |
| U5                | -                                                | 24                           | -                        | 24             |
| U6                | -                                                | 64                           | -                        | 64             |
| U6atac            | -                                                | 13                           | -                        | 13             |
| <b>RnaseMRP</b>   | -                                                | 2                            | -                        | 2              |
| <b>RNaseSRP</b>   | -                                                | 31                           | -                        | 31             |

1870

1871

1872 **Supplementary Table 16 Distribution of the various non-coding element categories for**  
1873 **small RNAseq data.**

1874

| <b>Non-coding elements</b> | <b>% aligned reads</b> |
|----------------------------|------------------------|
| Predicted ncRNA (P)        | 41.0%                  |
| LncRNA (L)                 | 25.5%                  |
| Transposon elements (T)    | 38.3%                  |
| Total (P+L+T)              | 72.4%                  |

1880

1881

1882



1883 **Supplementary Table 17 Geographical location of the natural stands from which the**  
1884 **pedunculate oak genotypes were sampled for pool sequencing.**

1885

|                            |                                                                                                            |
|----------------------------|------------------------------------------------------------------------------------------------------------|
| <b>Site name:</b>          | ISS Landes                                                                                                 |
| <b>Country:</b>            | France                                                                                                     |
| <b>Latitude/Longitude:</b> | 001°05' W / 44°13' N                                                                                       |
| <b>Elevation:</b>          | 46m                                                                                                        |
| <b>Total area:</b>         | 25,600ha                                                                                                   |
| <b>Ecosystem:</b>          | Intensively managed                                                                                        |
| <b>Tree species:</b>       | <i>Alnus, Betula, Castanea, Corylus, Crataegus, Fagus, Fraxinus, Pinus, Prunus, Quercus, Salix, Sorbus</i> |
| <b>Land ownership:</b>     | Mainly private                                                                                             |
| <b>Protection:</b>         | Includes Natura 2000 sites                                                                                 |

1886

1887

1888

1889 **Supplementary Table 18 List of selected pedunculate oak genotypes used for pool**  
 1890 **sequencing.**

1891

| <b>Tree ID</b> | <b>Circumference (in cm at breast height)</b> | <b>Longitude (degrees, minutes seconds)</b> | <b>Latitude (degrees, minutes seconds)</b> | <b>Longitude (decimal format)</b> | <b>Latitude (decimal format)</b> |
|----------------|-----------------------------------------------|---------------------------------------------|--------------------------------------------|-----------------------------------|----------------------------------|
| 74             | 139                                           | -1.03129337                                 | 44.1717826                                 | -1.053592703                      | 44.288285056                     |
| 352            | 83                                            | -1.10264801                                 | 44.1348514                                 | -1.174022236                      | 44.230142753                     |
| 357            | 156                                           | -1.10195197                                 | 44.1347728                                 | -1.172088818                      | 44.229924535                     |
| 358            | 162                                           | -1.10178383                                 | 44.1347546                                 | -1.171621740                      | 44.229873982                     |
| 501            | 137                                           | -1.07406943                                 | 44.1248027                                 | -1.127970645                      | 44.213340929                     |
| 521            | 92                                            | -1.04406161                                 | 44.1252738                                 | -1.077948924                      | 44.214649407                     |
| 523            | 137                                           | -1.04439618                                 | 44.1252668                                 | -1.078878276                      | 44.214629927                     |
| 602            | 59                                            | -1.09019065                                 | 44.1139846                                 | -1.150529574                      | 44.194401571                     |
| 607            | 206                                           | -1.09013664                                 | 44.1145476                                 | -1.150379563                      | 44.195965590                     |
| 1106           | 190                                           | -1.05490144                                 | 44.1353328                                 | -1.096948441                      | 44.231480098                     |
| 1108           | 310                                           | -1.05472739                                 | 44.1349324                                 | -1.096464983                      | 44.230367702                     |
| 1135           | 169                                           | -1.02262027                                 | 44.1347846                                 | -1.040611864                      | 44.229957358                     |
| 1136           | 138                                           | -1.02280321                                 | 44.1346933                                 | -1.041120023                      | 44.229703499                     |
| 1152           | 96                                            | -1.00381904                                 | 44.1334381                                 | -1.010608455                      | 44.226216872                     |
| 1153           | 210                                           | -1.00406239                                 | 44.1334619                                 | -1.011284422                      | 44.226283131                     |
| 1345           | 264                                           | -1.07068438                                 | 44.1436749                                 | -1.118567729                      | 44.243541419                     |
| 1361           | 255                                           | -1.053003                                   | 44.134922                                  | -1.091675153                      | 44.2303391                       |
| 1366           | 269                                           | -1.053368                                   | 44.134774                                  | -1.092688243                      | 44.22992846                      |
| 1410           | 260                                           | -1.06359865                                 | 44.1032791                                 | -1.109996257                      | 44.175775217                     |
| 1415           | 413                                           | -1.063471                                   | 44.103621                                  | -1.109641898                      | 44.17672361                      |

1892

1893

1894 **Supplementary Table 19 List of libraries for each of the three levels (L1, L2, L3) and number of sequences used for somatic mutation**  
 1895 **detection.**

1896

| <b>Tree Level</b> | <b>Libray ID _ run ID</b>   | <b>NCBI Accession</b> | <b>Read length (before trimming)</b> | <b>#Raw reads</b> | <b>Total length (after trimming)</b> | <b>Mean read length (after trimming)</b> |
|-------------------|-----------------------------|-----------------------|--------------------------------------|-------------------|--------------------------------------|------------------------------------------|
| L1                | BBX_AOSW_1_1_D1D53ACXX.IND5 |                       | 101                                  | 178225679         | 17503027812                          | 98.20710411                              |
| L1                | BBX_AOSW_1_2_D1D53ACXX.IND5 | ERX697294             | 101                                  | 178225679         | 17201970745                          | 96.51791393                              |
| L1                | BBX_AOSW_1_1_H32GMBCXX.IND5 |                       | 251                                  | 129340482         | 31344486178                          | 242.3408796                              |
| L1                | BBX_AOSW_1_2_H32GMBCXX.IND5 | ERX1886616            | 251                                  | 129340482         | 30061956368                          | 232.4249601                              |
| L1                | BBX_AOSW_2_1_H32GMBCXX.IND5 |                       | 251                                  | 132162999         | 32027294956                          | 242.3317812                              |
| L1                | BBX_AOSW_2_2_H32GMBCXX.IND5 | ERX1886622            | 251                                  | 132162999         | 30994003415                          | 234.5134693                              |
| L1                | BBX_AOSW_1_2_H57N7BCXX.IND5 |                       | 251                                  | 114968046         | 26394294031                          | 229.5793914                              |
| L1                | BBX_AOSW_1_1_H57N7BCXX.IND5 | ERX1886621            | 251                                  | 114968046         | 27764301183                          | 241.4958082                              |
| L2                | BBX_COSW_2_1_D1D53ACXX.IND7 |                       | 101                                  | 187527862         | 18297743615                          | 97.57346679                              |
| L2                | BBX_COSW_2_2_D1D53ACXX.IND7 | ERX697297             | 101                                  | 187527862         | 17809414834                          | 94.96943358                              |
| L2                | BBX_COSW_1_1_H072TAMXX.IND7 |                       | 251                                  | 88896954          | 21647068232                          | 243.5074236                              |
| L2                | BBX_COSW_1_2_H072TAMXX.IND7 | ERX697298             | 251                                  | 88896954          | 20874023496                          | 234.8114593                              |
| L2                | BBX_COSW_2_1_H072TAMXX.IND7 |                       | 251                                  | 89768432          | 21850638929                          | 243.4111685                              |
| L2                | BBX_COSW_2_2_H072TAMXX.IND7 | ERX697296             | 251                                  | 89768432          | 21059108981                          | 234.5937042                              |
| L2                | BBX_COSW_2_1_H57N7BCXX.IND7 |                       | 251                                  | 141600651         | 34063995611                          | 240.5638348                              |
| L2                | BBX_COSW_2_2_H57N7BCXX.IND7 | ERX1886620            | 251                                  | 141600651         | 32276725298                          | 227.9419273                              |
| L3                | BBX_EOSW_3_1_D1D53ACXX.IND9 |                       | 101                                  | 185076013         | 18128331412                          | 97.9507345                               |
| L3                | BBX_EOSW_3_2_D1D53ACXX.IND9 | ERX697292             | 101                                  | 185076013         | 17846097116                          | 96.42577029                              |
| L3                | BBX_EOSW_2_1_H32GLBCXX.IND9 |                       | 251                                  | 134000800         | 28711601308                          | 214.2644022                              |
| L3                | BBX_EOSW_2_2_H32GLBCXX.IND9 | ERX1886619            | 251                                  | 134000800         | 26474644233                          | 197.5707924                              |
| L3                | BBX_EOSW_1_1_H55MLBCXX.IND9 |                       | 251                                  | 127908274         | 30449513248                          | 238.0574164                              |
| L3                | BBX_EOSW_1_2_H55MLBCXX.IND9 | ERX1886617            | 251                                  | 127908274         | 28875401387                          | 225.7508485                              |
| L3                | BBX_EOSW_2_1_H55MLBCXX.IND9 |                       | 251                                  | 104846648         | 24974555304                          | 238.2007988                              |
| L3                | BBX_EOSW_2_2_H55MLBCXX.IND9 | ERX1886618            | 251                                  | 104846648         | 23191160974                          | 221.1912485                              |

1897  
 1898  
 1899  
 1900

1901 **Supplementary Table 20 MuTect comparisons indicating whether candidate SNPs are expected to be detected or not, depending on the**  
 1902 **age of the mutation.** L1, L2, L3 = end of selected branches;  $X_{L1}$  and  $X_{L2}$  = L1-branch and L2-branch initiation sites (see also Fig. 2b).

1903

| Colored tree section<br>in Fig. 2b                     |                   |        | <b>MuTect comparisons (reference vs. potentially mutated libraries)</b> |             |             |             |             |             |
|--------------------------------------------------------|-------------------|--------|-------------------------------------------------------------------------|-------------|-------------|-------------|-------------|-------------|
|                                                        |                   |        | L1 vs. L2                                                               | L1 vs. L3   | L2 vs. L1   | L2 vs. L3   | L3 vs. L1   | L3 vs. L2   |
| <b>Mutations<br/>occurring<br/>between<br/>levels:</b> | $X_{L1} - X_{L2}$ | blue   | X                                                                       | X           | $\emptyset$ | $\emptyset$ | $\emptyset$ | $\emptyset$ |
|                                                        | $X_{L2} - L3$     | pink   | $\emptyset$                                                             | X           | $\emptyset$ | X           | $\emptyset$ | $\emptyset$ |
|                                                        | $X_{L1} - L1$     | green  | $\emptyset$                                                             | $\emptyset$ | X           | $\emptyset$ | X           | $\emptyset$ |
|                                                        | $X_{L2} - L2$     | yellow | X                                                                       | $\emptyset$ | $\emptyset$ | $\emptyset$ | $\emptyset$ | X           |

1904

1905

1906 **Supplementary Table 21 List of the 15 eudicot plant genomes selected for the evolutionary analysis.** Growth habit or lifespan (W: woody  
 1907 perennials vs. H: annual herbaceous species) is indicated in the last column.

1908

| Scientific name             | Common name      | # of genes | Assembly version | Order        | Family        | Genus              | Growth habit |
|-----------------------------|------------------|------------|------------------|--------------|---------------|--------------------|--------------|
| <i>Arabidopsis lyrata</i>   | Lyrate rockcress | 32,657     | v1.0             | Brassicales  | Brassicaceae  | <i>Arabidopsis</i> | H            |
| <i>Arabidopsis thaliana</i> | Thale cress      | 27,416     | TAIR10           | Brassicales  | Brassicaceae  | <i>Arabidopsis</i> | H            |
| <i>Citrullus lanatus</i>    | Watermelon       | 23,440     | v1               | Cucurbitales | Cucurbitaceae | <i>Citrullus</i>   | H            |
| <i>Fragaria vesca</i>       | Strawberry       | 32,831     | v1.1             | Rosales      | Rosaceae      | <i>Fragaria</i>    | H            |
| <i>Glycine max</i>          | Soybean          | 56,044     | Wm82.a2.v1       | Fabales      | Fabaceae      | <i>Glycine</i>     | H            |
| <i>Ricinus communis</i>     | Castorbean       | 31,221     | v0.1             | Malpighiales | Euphorbiaceae | <i>Ricinus</i>     | H            |
| <i>Solanum tuberosum</i>    | Potato           | 35,119     | v3.4             | Solanales    | Solanaceae    | <i>Solanum</i>     | H            |
| <i>Carica papaya</i>        | Papaya           | 27,584     | ASGPBv0.4        | Brassicales  | Caricaceae    | <i>Carica</i>      | W            |
| <i>Citrus clementina</i>    | Clementine       | 24,533     | v1.0             | Sapindales   | Rutaceae      | <i>Citrus</i>      | W            |
| <i>Eucalyptus grandis</i>   | Eucalyptus       | 36,376     | v2.0             | Myrtales     | Myrtaceae     | <i>Eucalyptus</i>  | W            |
| <i>Malus domestica</i>      | Apple            | 63,514     | v1.0             | Rosales      | Rosaceae      | <i>Malus</i>       | W            |
| <i>Populus trichocarpa</i>  | Poplar           | 41,335     | v3.0             | Malpighiales | Salicaceae    | <i>Populus</i>     | W            |
| <i>Prunus persica</i>       | Peach            | 27,864     | v2.1             | Rosales      | Rosaceae      | <i>Prunus</i>      | W            |
| <i>Theobroma cacao</i>      | Cocoa            | 29,452     | v1.1             | Malvales     | Malvaceae     | <i>Theobroma</i>   | W            |
| <i>Vitis vinifera</i>       | Grape            | 26,346     | Genoscope_12X    | Vitales      | Vitaceae      | <i>Vitis</i>       | W            |

1909

1910

1911 **Supplementary Table 22 Contribution of gene models for the 16 studied species to**  
 1912 **orthoMCL orthogroups.**

1913

| Growth habit       | Species                     | Abbreviation | Genes in orthogroups |             |             |            | # orthogroups without gene (%) | #species-specific orthogroups (%) |
|--------------------|-----------------------------|--------------|----------------------|-------------|-------------|------------|--------------------------------|-----------------------------------|
|                    |                             |              | Total                | Mean        | SD          | Max        |                                |                                   |
| Herbaceous species | <i>Arabidopsis lyrata</i>   | Al           | 27,260               | 0.74        | 1.67        | 96         | 19,658 (49.8)                  | 813 (2.1)                         |
|                    | <i>Arabidopsis thaliana</i> | At           | 24,733               | 0.67        | 1.56        | 124        | 20,128 (51.0)                  | 141 (0.4)                         |
|                    | <i>Citrullus lanatus</i>    | Wa           | 20,192               | 0.55        | 2.66        | 363        | 24,069 (61.0)                  | 364 (0.9)                         |
|                    | <i>Fragaria vesca</i>       | Fv           | 25,093               | 0.68        | 2.31        | 167        | 22,540 (57.2)                  | 1,275 (3.2)                       |
|                    | <i>Glycine max</i>          | Gm           | 46,400               | 1.26        | 3.68        | 295        | 21,609 (54.8)                  | 1,552 (3.9)                       |
|                    | <i>Ricinus communis</i>     | Rc           | 21,088               | 0.57        | 1.23        | 79         | 22,186 (56.3)                  | 754 (1.9)                         |
|                    | <i>Solanum tuberosum</i>    | St           | 28,897               | 0.78        | 7.01        | 1062       | 23,803 (60.4)                  | 1,060 (2.7)                       |
| Woody perennials   | <i>Carica papaya</i>        | Cp           | 20,285               | 0.55        | 2.63        | 395        | 23,361 (59.2)                  | 520 (1.3)                         |
|                    | <i>Citrus climentina</i>    | Cc           | 21,425               | 0.58        | 1.95        | 130        | 22,928 (58.1)                  | 316 (0.8)                         |
|                    | <i>Eucalyptus grandis</i>   | Eg           | 29,063               | 0.79        | 3.59        | 228        | 23,229 (58.9)                  | 722 (1.8)                         |
|                    | <i>Malus domestica</i>      | Md           | 46,524               | 1.26        | 4.04        | 378        | 19,627 (49.8)                  | 3,324 (8.4)                       |
|                    | <i>Populus trichocarpa</i>  | Pt           | 33,604               | 0.91        | 2.75        | 183        | 21,923 (55.6)                  | 728 (1.8)                         |
|                    | <i>Prunus persica</i>       | Pp           | 24,651               | 0.67        | 5.37        | 907        | 22,299 (56.5)                  | 311 (0.8)                         |
|                    | <b><i>Quercus robur</i></b> | <b>Qr</b>    | <b>22,498</b>        | <b>0.61</b> | <b>3.31</b> | <b>359</b> | <b>25,031 (63.5)</b>           | <b>479 (1.2)</b>                  |
|                    | <i>Theobroma cacao</i>      | Tc           | 23,608               | 0.64        | 2.46        | 208        | 22,253 (56.4)                  | 465 (1.2)                         |
|                    | <i>Vitis vinifera</i>       | Vv           | 19,774               | 0.54        | 1.49        | 105        | 23,893 (60.6)                  | 589 (1.5)                         |

1914

1915

1916 **Supplementary Table 23 Major family of repetitive elements identified by**  
 1917 **RepeatMasker within the sequenced BAC clones.**

1918

| <b>Family</b>                  | <b>Length<br/>(bp)</b> | <b>%</b>  |
|--------------------------------|------------------------|-----------|
| <b>DNA transposon</b>          | <b>289,344</b>         | <b>36</b> |
| hAT                            | 54,917                 | 6         |
| EnSpm/CACTA                    | 38,913                 | 4         |
| MuDR                           | 36,662                 | 4         |
| Helitron                       | 35,283                 | 4         |
| Harbinger                      | 17,583                 | 2         |
| Polinton                       | 17,078                 | 2         |
| Mariner/Tc1                    | 12,792                 | 1         |
| <b>Retrotransposon</b>         | <b>504,226</b>         | <b>63</b> |
| -LTR Retrotransposon           | 361,480                | 45        |
| Gypsy                          | 222,020                | 27        |
| Copia                          | 126,984                | 15        |
| -Non-LTR Retrotransposon       | 142,746                | 17        |
| <b>Total length of repeats</b> | <b>794,208</b>         |           |

1919

1920

1921

1922

1923 **Supplementary Table 24 Oak BAC sequence statistics.**

1924

|                                                                                          |                                                      |
|------------------------------------------------------------------------------------------|------------------------------------------------------|
| <b>Total sequence length</b>                                                             | 4,344,182 bp                                         |
| <b>Sequence length excluding stretches of Ns</b>                                         | 4,282,332 bp (number of Ns: 61,850)                  |
| <b>GC content %</b>                                                                      | 35.9                                                 |
| <b>Number of predicted protein coding genes</b>                                          | 198 <sup>1</sup> , 50 <sup>2</sup> , 30 <sup>3</sup> |
| <b>Number of predicted protein coding genes with homology to oak unigene<sup>4</sup></b> | 198                                                  |
| <b>tRNA genes</b>                                                                        | 4                                                    |
| <b>Gene density</b>                                                                      | 6 genes/100 kb                                       |
| <b>Mean gene length</b>                                                                  | 4,028 bp <sup>5</sup>                                |
| <b>Mean number of exons per gene</b>                                                     | 5.4                                                  |
| <b>Mean exon length</b>                                                                  | 232 bp                                               |
| <b>% of genes with introns</b>                                                           | 83.5                                                 |
| <b>Average intron length</b>                                                             | 615 bp                                               |

1925 <sup>1</sup> Approved: gene structure was modified or validated after manual curation.

1926 <sup>2</sup> Problematic: gene structure remains after manual curation.

1927 <sup>3</sup> deleted

1928 <sup>4</sup> from Lesur et al.<sup>23</sup>

1929 <sup>5</sup> UTRs were not considered.

1930



1931

1932 **Supplementary Table 25 Summary of overlapping regions between allelic BACs.** BAC1 and BAC2 referred to pairs of allelic BACs.

1933

| <b>BAC 1</b> | <b>BAC 2</b> | <b>% of BAC 1 covered</b> | <b>% identity</b> | <b>E-value</b> | <b>Range of overlap BAC 1 (bp)</b> | <b>Length of overlapping region_BAC 1 (bp)</b> | <b>Range of overlap BAC 2</b> | <b>Length of overlapping region_BAC 2 (bp)</b> |
|--------------|--------------|---------------------------|-------------------|----------------|------------------------------------|------------------------------------------------|-------------------------------|------------------------------------------------|
| 50E24        | 177A20       | 44                        | 98                | 0.0            | 74,218-140,871                     | 66,655                                         | 21,871-75,811                 | 53,940                                         |
| 5E10         | 107I07       | 43                        | 97                | 0.0            | 34-52,488                          | 52,454                                         | 11,315-86,163                 | 74,848                                         |
| 12J1         | 121F17       | 50                        | 97                | 0.0            | 3,328-69,071                       | 65,743                                         | 1-107,378                     | 107,378                                        |
| 27L03        | 48K1         | 27                        | 97                | 0.0            | 72-22,592                          | 22,520                                         | 94,896-110,662                | 25,766                                         |
| 64H3         | 30P1         | 55                        | 99                | 0.0            | 11,197-105,888                     | 94,691                                         | 1-87,454                      | 87,454                                         |

1934

1935

1936

1937 **Supplementary Table 26 Results of BLAST-n alignment (Evalue=0 and identity >95%)**  
 1938 **between overlapping BAC regions. BAC1 and BAC2 are pairs of allelic BAC.**

1939

| BAC 1 (start-end)     | BAC 2 (start-end)      | % identity | E-value |
|-----------------------|------------------------|------------|---------|
| 50E24 (82472-97166)   | 177A20 (101617-86956)  | 98.313     | 0.0     |
| 50E24 (97342-98711)   | 177A20 (86962-85573)   | 97.557     | 0.0     |
| 50E24 (99445-102142)  | 177A20 (85526-82785)   | 95.796     | 0.0     |
| 50E24 (102139-102632) | 177A20 (77962-77469)   | 98.178     | 0.0     |
| 50E24 (102630-104811) | 177A20 (72280-70100)   | 99.313     | 0.0     |
| 50E24 (104964-113458) | 177A20 (67500-59008)   | 97.533     | 0.0     |
| 50E24 (115554-119919) | 177A20 (59015-54685)   | 93.276     | 0.0     |
| 50E24 (120139-121173) | 177A20 (54688-53673)   | 88.509     | 0.0     |
| 50E24 (121653-122102) | 177A20 (43131-42688)   | 95.778     | 0.0     |
| 50E24 (122088-130991) | 177A20 (42426-33477)   | 96.247     | 0.0     |
| 50E24 (130983-137845) | 177A20 (31276-24398)   | 95.750     | 0.0     |
| 50E24 (138678-140871) | 177A20 (24080-21871)   | 97.473     | 0.0     |
| 5E10 (34-13493)       | 107I07 (86163-72751)   | 96.690     | 0.0     |
| 5E10 (6111-8673)      | 107I07 (96063-93431)   | 89.234     | 0.0     |
| 5E10 (15109-16637)    | 107I07 (72758-71221)   | 95.596     | 0.0     |
| 5E10 (16633-19460)    | 107I07 (60951-58146)   | 95.046     | 0.0     |
| 5E10 (19562-20049)    | 107I07 (58152-57640)   | 93.177     | 0.0     |
| 5E10 (20042-25226)    | 107I07 (57568-52375)   | 97.546     | 0.0     |
| 5E10 (20099-30015)    | 107I07 (48048-38134)   | 95.357     | 0.0     |
| 5E10 (30710-44385)    | 107I07 (37408-23814)   | 95.014     | 0.0     |
| 5E10 (44376-47570)    | 107I07 (18423-15229)   | 97.444     | 0.0     |
| 5E10 (47654-51561)    | 107I07 (15245-11315)   | 95.392     | 0.0     |
| 5E10 (51556-52488)    | 107I07 (929-1)         | 98.178     | 0.0     |
| 12J1 (3328-9386)      | 121F17 (107378-101370) | 97.776     | 0.0     |
| 12J1 (10865-15722)    | 121F17 (101374-96618)  | 95.163     | 0.0     |
| 12J1 (15714-16429)    | 121F17 (96088-95351)   | 92.473     | 0.0     |
| 12J1 (17136-17988)    | 121F17 (94236-93385)   | 97.541     | 0.0     |
| 12J1 (17555-25498)    | 121F17 (92576-84615)   | 97.074     | 0.0     |
| 12J1 (25929-36992)    | 121F17 (67374-56308)   | 97.545     | 0.0     |
| 12J1 (27681-28891)    | 121F17 (111037-109862) | 94.403     | 0.0     |
| 12J1 (40309-55775)    | 121F17 (51089-35673)   | 97.417     | 0.0     |
| 12J1 (57057-65797)    | 121F17 (12263-3515)    | 97.174     | 0.0     |
| 12J1 (65796-69071)    | 121F17 (3253-1)        | 97.063     | 0.0     |
| 27L03 (72-1944)       | 48K1 (94896-96762)     | 97.340     | 0.0     |
| 27L03 (1937-6237)     | 48K1 (97857-102122)    | 97.846     | 0.0     |
| 27L03 (6914-13853)    | 48K1 (102111-109054)   | 97.113     | 0.0     |
| 27L03 (14881-16542)   | 48K1 (109051-110662)   | 92.123     | 0.0     |
| 27L03 (15395-16915)   | 48K1 (70312-71817)     | 90.582     | 0.0     |
| 27L03 (20326-20919)   | 48K1 (95799-96389)     | 93.311     | 0.0     |
| 27L03 (22071-22592)   | 48K1 (102497-103027)   | 90.038     | 0.0     |
| 64H3 (11197-22071)    | 30P1 (87454-76608)     | 98.232     | 0.0     |
| 64H3 (27384-29525)    | 30P1 (71127-68965)     | 98.661     | 0.0     |

|                     |                    |         |     |
|---------------------|--------------------|---------|-----|
| 64H3 (29522-35146)  | 30P1 (61773-67407) | 96.079  | 0.0 |
| 64H3 (35355-37869)  | 30P1 (61236-58733) | 98.648  | 0.0 |
| 64H3 (46894-49574)  | 30P1 (50014-47328) | 97.993  | 0.0 |
| 64H3 (60365-80565)  | 30P1 (46359-26158) | 99.975  | 0.0 |
| 64H3 (83318-94716)  | 30P1 (17599-6207)  | 99.073  | 0.0 |
| 64H3 (94715-97846)  | 30P1 (4554-1423)   | 100.000 | 0.0 |
| 64H3 (99674-100979) | 30P1 (1322-1)      | 95.925  | 0.0 |

---

1940

1941

1942 **Supplementary Table 27 Metrics of the previous release (V1) and current release (V2) of**  
 1943 **the oak diploid genome assembly.**

|                                                       | <b>Diploid V1<sup>b</sup></b> | <b>Diploid V2</b>                     |
|-------------------------------------------------------|-------------------------------|---------------------------------------|
| <b>Assembly</b>                                       | 454 + Illumina                | 454 + Illumina + Synthetic Long Reads |
| <b>No. of sequences</b>                               | 17,910                        | 8,827                                 |
| <b>Cumulative size</b>                                | 1,354,311,717                 | 1,455,104,916                         |
| <b>N50</b>                                            | 256,640                       | 821,707                               |
| <b>N90</b>                                            | 35,065                        | 198,501                               |
| <b>L50</b>                                            | 1,468                         | 537                                   |
| <b>L90</b>                                            | 6,626                         | 1,880                                 |
| <b>% of N's</b>                                       | 11.56                         | 4.6                                   |
| <b>Completeness using BUSCO</b>                       | 274 (90.4%)                   | 275 (90.8%)                           |
| <b>Oak RNA-seq genes (90,786 contigs)<sup>a</sup></b> | 86,457 (95.2%)                | 86,488 (95.3%)                        |

1944 <sup>a</sup>from Lesur et al. <sup>23</sup>, <sup>b</sup>from Plomion et al. <sup>19</sup>  
 1945

1946 **Supplementary Table 28 Classification of marker-scaffold relationships into four**  
 1947 **categories.** The number of markers and the number of scaffolds within each category are  
 1948 provided.

1949

| <b>Scaffold-<br/>marker<br/>relationship</b> | <b>Comment</b>                                                            | <b>Number of<br/>markers/2,615</b> | <b>Number of scaffolds<br/>(cumulative size Mb)</b> |
|----------------------------------------------|---------------------------------------------------------------------------|------------------------------------|-----------------------------------------------------|
| Category#1                                   | Scaffold anchored with a single marker                                    | 165                                | 165 (90.8)                                          |
| Category#2                                   | Scaffold anchored with at least 2 markers from the same LG                | 1412                               | 331 (320)                                           |
| Category#3                                   | Scaffold anchored with more than 50% of the markers from the same LG      | 898                                | 116 (214)                                           |
| Category#4                                   | Scaffolds (unassigned) with less than 50% of the markers from the same LG | 140                                | 116 (46.7)                                          |

1950

1951

1952 **Supplementary Table 29 Rank correlations (rho) between genetic and physical positions along the 12 chromosomes. LG: linkage group.**

1953

| <b>LG</b>    | <b>size (cM)</b> | <b>No. of markers</b> | <b>#markers on chromosomes</b> | <b>Chr_start (bp)</b> | <b>Chr_end (bp)</b> | <b>LG_start (cM)</b> | <b>LG_end (cM)</b> | <b>rho</b> |
|--------------|------------------|-----------------------|--------------------------------|-----------------------|---------------------|----------------------|--------------------|------------|
| <b>1</b>     | 66.43            | 421                   | 320                            | 223,913               | 55,067,536          | 0.64                 | 66.43              | 0.998      |
| <b>2</b>     | 103.92           | 922                   | 676                            | 79,368                | 115,173,360         | 0.03                 | 103.92             | 0.999      |
| <b>3</b>     | 75.98            | 400                   | 281                            | 244,065               | 57,437,871          | 6.3                  | 75.98              | 0.998      |
| <b>4</b>     | 75.7             | 291                   | 171                            | 339,968               | 44,508,357          | 3.42                 | 75.42              | 0.994      |
| <b>5</b>     | 85.84            | 398                   | 263                            | 90,378                | 70,598,779          | 0.61                 | 85.41              | 0.998      |
| <b>6</b>     | 74.87            | 537                   | 409                            | 201,326               | 55,995,377          | 0.64                 | 74.87              | 0.998      |
| <b>7</b>     | 65.26            | 419                   | 321                            | 75,105                | 51,549,230          | 1.8                  | 63.5               | 0.998      |
| <b>8</b>     | 70.8             | 572                   | 459                            | 105,078               | 71,279,127          | 1.86                 | 70.2               | 0.998      |
| <b>9</b>     | 68.7             | 400                   | 273                            | 118,866               | 50,074,090          | 0.94                 | 68.7               | 0.996      |
| <b>10</b>    | 66.8             | 381                   | 284                            | 332,011               | 50,211,705          | 0.62                 | 66.8               | 0.998      |
| <b>11</b>    | 66.46            | 391                   | 316                            | 451,420               | 51,991,272          | 1.08                 | 66.46              | 0.991      |
| <b>12</b>    | 66.82            | 457                   | 297                            | 677                   | 39,751,979          | 0.29                 | 66.82              | 0.996      |
| <b>Total</b> | 887.58           | 5,589                 | 4,070                          |                       | 711,376,508         |                      | 866.28             | 0.997      |

1954

1955

1956

1957 **Supplementary Table 30 Transposable element annotation: comparison between the 16 eudicot species used in this study.**

1958

| Scientific name             | Woody/<br>Herbaceous | Common name               | Ref.       | Assembly length annotated (Mb) | TE (Mb)    | TE %      | LTR % TE    | Non-LTR % TE | Other class I % TE | Class I % TE | Class II % TE | Other % TE  |
|-----------------------------|----------------------|---------------------------|------------|--------------------------------|------------|-----------|-------------|--------------|--------------------|--------------|---------------|-------------|
| <i>Arabidopsis lyrata</i>   | H                    | <i>Arabidopsis lyrata</i> | 38         | 207                            | 61         | 29.7      | 64          | 8            | 0                  | 72           | 25            | 3           |
| <i>Arabidopsis thaliana</i> | H                    | Thale cress               | 38         | 135                            | 32         | 23.7      | 50          | 28           | 0                  | 78           | 6             | 16          |
| <i>Citrullus lanatus</i>    | H                    | Watermelon                | 153        | 354                            | 160        | 45.2      | Major       | NA           | NA                 | Major        | NA            | NA          |
| <i>Fragaria vesca</i>       | H                    | Strawberry                | 154        | 209                            | 48         | 22.81     | 69.8        | 2            | 0                  | 71.8         | 28.2          | 0           |
| <i>Glycine max</i>          | H                    | Soybean                   | 155        | 955                            | 561        | 58.7      | 71.5        | 0.4          | 0                  | 71.9         | 28.1          | 0           |
| <i>Ricinus communis</i>     | H                    | Castor bean               | 156        | 350                            | 176        | 50.3      | 32.2        | 0.3          | 3.6                | 36.1         | 1.8           | 62.1        |
| <i>Solanum tuberosum</i>    | H                    | Potato                    | 157        | 727                            | 452        | 62.2      | 45.93       | 4.51         | 0                  | 50.4         | 6.2           | 43.4        |
| <i>Carica papaya</i>        | W                    | Papaya                    | 42         | 815                            | 423        | 51.9      |             | 77           | 0                  | 77           | 0.2           | 22.8        |
| <i>Citrus clementina</i>    | W                    | Clementine                | 43         | 816                            | 347        | 42.5      | 47          | 2.9          | 0                  | 49.9         | 6.3           | 43.8        |
| <i>Eucalyptus grandis</i>   | W                    | Eucalyptus                | 41         | 817                            | 409        | 50        | 73          | 7            | 5                  | 85           | 11            | 4           |
| <i>Malus domestica</i>      | W                    | Apple                     | 40         | 818                            | 347        | 42.4      | 73.4        | 15.3         | 0                  | 88.7         | 2.1           | 9.2         |
| <i>Populus trichocarpa</i>  | W                    | Poplar                    | 158        | 820                            | 362        | 44.2      | 18.6        | 1.4          | 0.1                | 20.1         | 6.1           | 73.8        |
| <i>Prunus persica</i>       | W                    | Peach                     | 39         | 226                            | 67         | 29.6      | 66.1        | 2.1          | 1.2                | 69.4         | 30.6          | 0           |
| <i>Theobroma cacao</i>      | W                    | Cocoa bean                | 159        | 346                            | 144        | 41.5      | 77.9        | 0.4          | 0                  | 78.3         | 21.7          | 0           |
| <i>Vitis vinifera</i>       | W                    | Grape                     | 160        | 467                            | 193        | 41.4      | 55.9        | 9.5          | 1.3                | 66.7         | 2             | 31.3        |
| <b><i>Quercus robur</i></b> | <b>W</b>             | <b>Oak</b>                | this study | <b>814</b>                     | <b>421</b> | <b>52</b> | <b>53.1</b> | <b>16</b>    | <b>1</b>           | <b>70.1</b>  | <b>15.2</b>   | <b>14.7</b> |

1959

1960 **Supplementary Table 31 Oak gene structure statistics.**

1961

---

|                                       |        |
|---------------------------------------|--------|
| <b>Total protein coding genes</b>     | 25,808 |
| <b>Gene space (Mb)</b>                | 75     |
| <b>Gene density (# genes / 10 kb)</b> | 0.32   |
| <b>Gene mean / median (bp)</b>        | 2,907  |
| <b>Gene median (bp)</b>               | 2,137  |
| <b>CDS mean (bp)</b>                  | 1,174  |
| <b>CDS median (bp)</b>                | 942    |
| <b>#CDS &lt; 500 bp</b>               | 4,367  |
| <b>#CDS &gt; 3 kb</b>                 | 1,162  |
| <b>Genes with introns (%)</b>         | 79%    |
| <b>#Introns/gene (mean)</b>           | 3.3    |

---

1962

1963



1964 **Supplementary Table 32 Horizontal transfers of LTR retrotransposons between oak and**  
 1965 **other plant species.**

1966

| <b>Name of the LTR-retrotransposon family</b>          | <b>Species involved in the transfer</b> |
|--------------------------------------------------------|-----------------------------------------|
| RLX-incomp_Qrob_v2_More29k-B-R2774-Map5_reversed       | oak / grapevine                         |
| RLX-incomp-chim_Qrob_v2_More29k-B-R25479-Map5_reversed | oak / grapevine                         |
| RLX-incomp-chim_Qrob_v2_More29k-B-R32795-Map5_reversed | oak / grapevine                         |
| RLX-comp_Qrob_v2_More29k-B-G5453-Map6_reversed         | oak / grapevine                         |
| RLX-comp_Qrob_v2_More29k-B-P1015.803-Map7              | oak / grapevine                         |
| RLX-incomp_Qrob_v2_More29k-B-R289-Map20_reversed       | oak / grapevine                         |
| RLX-comp_Qrob_v2_More29k-B-R13571-Map19                | oak / poplar                            |
| RLX-incomp_Qrob_v2_More29k-B-R2774-Map5_reversed       | oak / grapevine / peach tree            |

1967

1968

1969

1970 **Supplementary Table 33 List of putative aquaporins identified in the pedunculate oak genome (haplome assembly).** Number of exons and  
 1971 protein length (in amino-acids) are given. The aromatic/arginine selectivity filter (H, transmembrane helix and LE, loop E), the NPA motifs (LB,  
 1972 loop B and LE, loop E) and the five Froger's positions were identified from multiple sequence alignments.

1973

| gene model ID                    | N°<br>exon | protein<br>(AA) | Ar/R filter |    |     |     | NPA motif |     | Froger's position |        |    |    |    | subclass | remarks                  |
|----------------------------------|------------|-----------------|-------------|----|-----|-----|-----------|-----|-------------------|--------|----|----|----|----------|--------------------------|
|                                  |            |                 | H2          | H5 | LE1 | LE2 | LB        | LE  | P<br>1            | P<br>2 | P3 | P4 | P5 |          |                          |
| Qrob_T0687390.2                  | 5          | 277             | W           | V  | A   | R   | NPA       | NPA | F                 | S      | A  | Y  | M  | NIP1     |                          |
| Qrob_T0687410.2                  | 5          | 289             | W           | V  | A   | R   | NPS       | NPA | F                 | T      | A  | Y  | M  | NIP1     |                          |
| Qrob_T0405130.2                  | 5          | 261             | W           | V  | A   | R   | NPA       | NPA | F                 | S      | A  | Y  | I  | NIP4     | GC at ex/intron boundary |
| Qrob_T0144140.2                  | 5          | 273             | W           | V  | A   | R   | NPA       | NPA | F                 | S      | A  | Y  | V  | NIP4     |                          |
| Qrob_T0275880.2 ( <sup>1</sup> ) | 5          | 268             | W           | V  | A   | R   | NPA       | NPA | F                 | S      | A  | Y  | V  | NIP4     |                          |
| Qrob_T0748200.2 ( <sup>2</sup> ) | 4          | 298             | A           | I  | G   | R   | NPS       | NPV | F                 | T      | A  | F  | L  | NIP5     |                          |
| Qrob_T0118430.2                  | 5          | 304             | T           | I  | G   | R   | NPA       | NPV | F                 | T      | A  | Y  | M  | NIP6     |                          |
| Qrob_T0697150.2                  | 5          | 282             | A           | V  | G   | R   | NPA       | NPA | Y                 | S      | A  | Y  | V  | NIP7     |                          |
| Qrob_T0345370.2 (*)              | 4          | 285             | F           | H  | T   | R   | NPA       | NPA | G                 | S      | A  | F  | W  | PIP1     |                          |
| Qrob_T0236650.2                  | 4          | 289             | F           | H  | T   | R   | NPA       | NPA | E                 | S      | A  | F  | W  | PIP1     |                          |
| Qrob_T0705530.2                  | 4          | 286             | F           | H  | T   | R   | NPA       | NPA | E                 | S      | A  | F  | W  | PIP1     |                          |
| Qrob_T0348530.2                  | 4          | 287             | F           | H  | T   | R   | NPA       | NPA | Q                 | S      | A  | F  | W  | PIP1     |                          |
| Qrob_T0373060.2                  | 4          | 278             | F           | H  | T   | R   | NPA       | NPA | M                 | S      | A  | F  | W  | PIP2     |                          |
| Qrob_T0438960.2                  | 4          | 262             | F           | H  | T   | R   | NPA       | NPA | Q                 | S      | A  | F  | W  | PIP2     | GC at ex/intron boundary |

|                     |   |     |   |   |   |   |     |     |   |   |   |   |   |      |                               |
|---------------------|---|-----|---|---|---|---|-----|-----|---|---|---|---|---|------|-------------------------------|
| Qrob_T0438980.2     | 4 | 262 | F | H | T | R | NPA | NPA | Q | S | A | F | W | PIP2 | GC at ex/intron boundary      |
| Qrob_T0438970.2     | 4 | 262 | F | H | T | R | NPA | NPA | Q | S | A | F | W | PIP2 | GC at ex/intron boundary      |
| Qrob_T0438950.2     | 4 | 262 | F | H | T | R | NPA | NPA | Q | S | A | F | W | PIP2 | GC at ex/intron boundary      |
| Qrob_T0438990.2     | 4 | 286 | F | H | T | R | NPA | NPA | Q | S | A | F | W | PIP2 |                               |
| Qrob_T0602100.2     | 4 | 287 | F | H | T | R | NPA | NPA | Q | S | A | F | W | PIP2 |                               |
| Qrob_T0530060.2     | 4 | 281 | F | H | T | R | NPA | NPA | Q | S | A | F | W | PIP2 |                               |
| Qrob_T0131450.2     | 4 | 281 | F | H | T | R | NPA | NPA | A | S | A | F | W | PIP2 |                               |
| Qrob_T0602110.2     | 4 | 285 | F | H | T | R | NPA | NPA | Q | S | A | F | W | PIP2 |                               |
| Qrob_T0237440.2     | 1 | 239 | A | V | P | N | NPS | NPA | P | A | A | Y | W | SIP  |                               |
| Qrob_T0714870.2     | 3 | 241 | I | M | P | N | NPT | NPA | P | A | A | Y | W | SIP  |                               |
| Qrob_T0098460.2     | 3 | 237 | S | H | G | S | NPL | NPA | P | V | A | Y | W | SIP  |                               |
| Qrob_T0108440.2     | 3 | 252 | H | I | A | V | NPA | NPA | T | S | A | Y | W | TIP1 |                               |
| Qrob_T0398210.2     | 3 | 252 | H | I | A | V | NPA | NPA | T | S | A | Y | W | TIP1 |                               |
| Qrob_T0119780.2     | 2 | 251 | H | I | A | V | NPA | NPA | T | S | A | Y | W | TIP1 |                               |
| Qrob_T0656320.2     | 2 | 253 | H | I | A | V | NPA | NPA | T | S | A | Y | W | TIP1 |                               |
| Qrob_T0412470.2     | 3 | 248 | H | I | G | R | NPA | NPA | T | S | A | Y | W | TIP2 |                               |
| Qrob_T0538460.2     | 3 | 250 | H | I | G | R | NPA | NPA | T | S | A | Y | W | TIP2 |                               |
| Qrob_T0264600.2     | 3 | 246 | H | I | A | R | NPA | NPA | T | S | A | Y | W | TIP4 |                               |
| Qrob_T0082220.2 (*) | 3 | 234 | H | I | A | R | NPA | NPA | T | S | A | Y | W | TIP4 | T deletion -> variant protein |
| Qrob_T0375680.2     | 3 | 254 | N | V | G | C | NPA | NPA | V | S | A | Y | W | TIP5 |                               |

|                     |   |     |   |   |   |   |     |     |   |   |   |   |   |                                  |
|---------------------|---|-----|---|---|---|---|-----|-----|---|---|---|---|---|----------------------------------|
| Qrob_T0158140.2     | 1 | 236 | V | V | A | R | NPM | NPA | M | C | A | F | W | XIP2                             |
| Qrob_T0158150.2 (*) | 1 | 262 | V | I | V | G | SPE | NPA | M | C | A | F | W | XIP2                             |
| Qrob_T0158180.2     | 2 | 307 | I | I | A | K | SPI | NPA | M | C | A | F | W | XIP2                             |
| Qrob_T0158190.2     | 2 | 295 | I | I | V | K | SPI | NPA | M | C | A | F | W | XIP2                             |
| Qrob_T0158200.2     | 3 | 334 | I | T | V | R | NPA | NPA | V | C | A | F | W | XIP1                             |
| Qrob_T0656330.2     | 2 | 214 |   |   |   |   |     | NPA |   |   |   |   |   | Invalid unreliable reading frame |

<sup>(1)</sup> Sequence analysis was performed after the manual merging of Qrob\_T0275880.2 and Qrob\_T0275890.2.

<sup>(2)</sup> Due to poor sequence quality, sequence analysis was performed on its allelic version Qrob\_T0751510.2 (qrob\_v2\_scaffold\_2295:14651-1620 following manual curation).

(\*) Sequence analysis was performed after the manual curation of intron/exon prediction.

1974

1975

1976 **Supplementary Table 34 List of R2R3-MYB, MYB-3R and MYB-4R identified in the**  
 1977 **pedunculate oak genome (haplome assembly).** MYB predicted proteins were retrieved by  
 1978 three different approaches: those containing the MYB domain with the Pfam signature  
 1979 PF00249, those automatically annotated as MYB proteins, and those with homology to one of  
 1980 the Arabidopsis R2R3-MYB proteins after a BLAST-p search with an e-value of  $10e^{-10}$  as the  
 1981 threshold. The predicted proteins identified were inspected and manually curated. R2R3-  
 1982 MYB genes were named with consecutive numbers starting from the first gene on the first  
 1983 chromosome scaffold (QroMYB1 - QroMYB129) to the genes not assigned to any  
 1984 chromosome (QroMYB130 - QroMYB139). 3R-MYB and 4R-MYB genes are named with  
 1985 letters in alphabetical order, also starting from the first gene on the first chromosome scaffold  
 1986 (QroMYB3R-A to QroMYB3R-E, and QroMYB4R-A).

1987

1988

| MYB ID    | Transcript_id   | MYB Subgroup | Scaffold_ID on H2.3     | Pseudomolecule | Gene start | Gene end | Gene length (in bp UTR + CDS + introns) |
|-----------|-----------------|--------------|-------------------------|----------------|------------|----------|-----------------------------------------|
| QrobMYB1  | Qrob_T0404990.2 | WPS-III      | Qrob_H2.3_Sc000<br>0317 | Chr1           | 414608     | 415980   | 1373                                    |
| QrobMYB2  | Qrob_T0371530.2 | SAAtMYB71    | Qrob_H2.3_Sc000<br>0141 | Chr1           | 5600909    | 5602170  | 1262                                    |
| QrobMYB3  | Qrob_T0371540.2 | SAAtMYB71    | Qrob_H2.3_Sc000<br>0141 | Chr1           | 5606927    | 5608155  | 1229                                    |
| QrobMYB4  | Qrob_T0371920.2 | SAAtM5       | Qrob_H2.3_Sc000<br>0122 | Chr1           | 9166327    | 9164971  | 1357                                    |
| QrobMYB5  | Qrob_T0731180.2 | S14          | Qrob_H2.3_Sc000<br>0439 | Chr1           | 17362712   | 17364185 | 1474                                    |
| QrobMYB6  | Qrob_T0252590.2 | SAAtM80      | Qrob_H2.3_Sc000<br>0299 | Chr1           | 17427162   | 17425846 | 1317                                    |
| QrobMYB7  | Qrob_T0252570.2 | SAAtM80      | Qrob_H2.3_Sc000<br>0299 | Chr1           | 17472705   | 17471387 | 1319                                    |
| QrobMYB8  | Qrob_T0252550.2 | WPS-V        | Qrob_H2.3_Sc000<br>0299 | Chr1           | 17515334   | 17513768 | 1567                                    |
| QrobMYB9  | Qrob_T0252540.2 | WPS-V        | Qrob_H2.3_Sc000<br>0299 | Chr1           | 17534040   | 17532476 | 1565                                    |
| QrobMYB10 | Qrob_T0252530.2 | WPS-V        | Qrob_H2.3_Sc000<br>0299 | Chr1           | 17555342   | 17553771 | 1572                                    |
| QrobMYB11 | Qrob_T0252520.2 | WPS-V        | Qrob_H2.3_Sc000<br>0299 | Chr1           | 17595722   | 17593968 | 1755                                    |
| QrobMYB12 | Qrob_T0252500.2 | WPS-V        | Qrob_H2.3_Sc000<br>0299 | Chr1           | 17665018   | 17663242 | 1777                                    |
| QrobMYB13 | Qrob_T0252490.2 | WPS-V        | Qrob_H2.3_Sc000<br>0299 | Chr1           | 17716131   | 17714566 | 1566                                    |
| QrobMYB14 | Qrob_T0595370.2 | SAAtM91      | Qrob_H2.3_Sc000<br>0542 | Chr1           | 28175476   | 28174268 | 1209                                    |
| QrobMYB15 | Qrob_T0660350.2 | S5           | Qrob_H2.3_Sc000<br>0038 | Chr1           | 39742573   | 39743584 | 1012                                    |
| QrobMYB16 | Qrob_T0402380.2 | S2 & S3      | Qrob_H2.3_Sc000<br>0332 | Chr1           | 45752069   | 45750448 | 1622                                    |
| QrobMYB17 | Qrob_T0307500.2 | S25          | Qrob_H2.3_Sc000<br>0054 | Chr1           | 49689933   | 49692324 | 2392                                    |
| QrobMYB18 | Qrob_T0722940.2 | S14          | Qrob_H2.3_Sc000<br>0511 | Chr2           | 4595691    | 4597686  | 1996                                    |
| QrobMYB19 | Qrob_T0059750.2 | S22          | Qrob_H2.3_Sc000<br>0025 | Chr2           | 5496656    | 5495769  | 888                                     |
| QrobMYB20 | Qrob_T0022470.2 | S18          | Qrob_H2.3_Sc000<br>0016 | Chr2           | 10726752   | 10728232 | 1481                                    |
| QrobMYB21 | Qrob_T0270990.2 | S19          | Qrob_H2.3_Sc000<br>0040 | Chr2           | 18266538   | 18263431 | 3108                                    |
| QrobMYB22 | Qrob_T0304630.2 | S5           | Qrob_H2.3_Sc000<br>0158 | Chr2           | 26868539   | 26867340 | 1200                                    |
| QrobMYB23 | Qrob_T0304650.2 | S5           | Qrob_H2.3_Sc000<br>0158 | Chr2           | 26893414   | 26894979 | 1566                                    |
| QrobMYB24 | Qrob_T0304670.2 | S5           | Qrob_H2.3_Sc000<br>0158 | Chr2           | 26920641   | 26921682 | 1042                                    |
| QrobMYB25 | Qrob_T0304700.2 | S5           | Qrob_H2.3_Sc000<br>0158 | Chr2           | 26949901   | 26950860 | 960                                     |

|           |                 |           |                         |      |          |          |      |
|-----------|-----------------|-----------|-------------------------|------|----------|----------|------|
| QrobMYB26 | Qrob_T0304800.2 | WPS-I     | Qrob_H2.3_Sc000<br>0158 | Chr2 | 27068410 | 27067516 | 895  |
| QrobMYB27 | Qrob_T0351500.2 | SAAtM35   | Qrob_H2.3_Sc000<br>0145 | Chr2 | 32194944 | 32197138 | 2195 |
| QrobMYB28 | Qrob_T0418840.2 | S14       | Qrob_H2.3_Sc000<br>0192 | Chr2 | 39581531 | 39580189 | 1343 |
| QrobMYB29 | Qrob_T0178010.2 | WPS-II    | Qrob_H2.3_Sc000<br>0043 | Chr2 | 41309398 | 41310479 | 1082 |
| QrobMYB30 | Qrob_T0121400.2 | SAAtM40   | Qrob_H2.3_Sc000<br>0083 | Chr2 | 47295425 | 47296526 | 1102 |
| QrobMYB31 | Qrob_T0203360.2 | WPS-II    | Qrob_H2.3_Sc000<br>0076 | Chr2 | 53133326 | 53134402 | 1077 |
| QrobMYB32 | Qrob_T0562460.2 | WPS-II    | Qrob_H2.3_Sc000<br>0524 | Chr2 | 55606964 | 55605873 | 1092 |
| QrobMYB33 | Qrob_T0395770.2 | S14       | Qrob_H2.3_Sc000<br>0314 | Chr2 | 55965127 | 55966278 | 1152 |
| QrobMYB34 | Qrob_T0398080.2 | S6        | Qrob_H2.3_Sc000<br>0207 | Chr2 | 69744225 | 69747170 | 2946 |
| QrobMYB35 | Qrob_T0459570.2 | WPS-V     | Qrob_H2.3_Sc000<br>0287 | Chr2 | 71044675 | 71046349 | 1675 |
| QrobMYB36 | Qrob_T0459610.2 | WPS-V     | Qrob_H2.3_Sc000<br>0287 | Chr2 | 71143342 | 71141657 | 1686 |
| QrobMYB37 | Qrob_T0324610.2 | S5        | Qrob_H2.3_Sc000<br>0127 | Chr2 | 72547948 | 72549947 | 2000 |
| QrobMYB38 | Qrob_T0324630.2 | S5        | Qrob_H2.3_Sc000<br>0127 | Chr2 | 72611633 | 72614513 | 2881 |
| QrobMYB39 | Qrob_T0324680.2 | S5        | Qrob_H2.3_Sc000<br>0127 | Chr2 | 72858478 | 72860109 | 1632 |
| QrobMYB40 | Qrob_T0365070.2 | S1        | Qrob_H2.3_Sc000<br>0003 | Chr2 | 85593235 | 85594741 | 1507 |
| QrobMYB41 | Qrob_T0102440.2 | S9a       | Qrob_H2.3_Sc000<br>0003 | Chr2 | 87682086 | 87684183 | 2098 |
| QrobMYB42 | Qrob_T0195940.2 | S15       | Qrob_H2.3_Sc000<br>0172 | Chr2 | 89155341 | 89154041 | 1301 |
| QrobMYB43 | Qrob_T0245380.2 | SAAtM82   | Qrob_H2.3_Sc000<br>0027 | Chr2 | 96414306 | 96415983 | 1678 |
| QrobMYB44 | Qrob_T0278740.2 | S14       | Qrob_H2.3_Sc000<br>0308 | Chr2 | 10658008 | 10658160 | 1516 |
| QrobMYB45 | Qrob_T0018660.2 | S5        | Qrob_H2.3_Sc000<br>0022 | Chr2 | 11126528 | 11126345 | 1828 |
| QrobMYB46 | Qrob_T0170360.2 | S15       | Qrob_H2.3_Sc000<br>0015 | Chr3 | 49517391 | 49516013 | 1379 |
| QrobMYB47 | Qrob_T0202260.2 | S9a       | Qrob_H2.3_Sc000<br>0176 | Chr3 | 54676627 | 54673958 | 2670 |
| QrobMYB48 | Qrob_T0038250.2 | SAAtM46   | Qrob_H2.3_Sc000<br>0070 | Chr4 | 3427089  | 3424578  | 2512 |
| QrobMYB49 | Qrob_T0642710.2 | S18       | Qrob_H2.3_Sc000<br>0629 | Chr4 | 24187005 | 24190552 | 3548 |
| QrobMYB50 | Qrob_T0641860.2 | WPS-I     | Qrob_H2.3_Sc000<br>0468 | Chr5 | 4569573  | 4570457  | 885  |
| QrobMYB51 | Qrob_T0641880.2 | WPS-I     | Qrob_H2.3_Sc000<br>0468 | Chr5 | 4694801  | 4695685  | 885  |
| QrobMYB52 | Qrob_T0641900.2 | WPS-I     | Qrob_H2.3_Sc000<br>0468 | Chr5 | 4777403  | 4778287  | 885  |
| QrobMYB53 | Qrob_T0641910.2 | S5        | Qrob_H2.3_Sc000<br>0468 | Chr5 | 4820012  | 4818765  | 1248 |
| QrobMYB54 | Qrob_T0070380.2 | SAAtM35   | Qrob_H2.3_Sc000<br>0056 | Chr5 | 18540876 | 18538781 | 2096 |
| QrobMYB55 | Qrob_T0523450.2 | SAAtMYB26 | Qrob_H2.3_Sc000<br>0464 | Chr5 | 23855006 | 23856326 | 1321 |
| QrobMYB56 | Qrob_T0221460.2 | WPS-V     | Qrob_H2.3_Sc000<br>0055 | Chr5 | 26538372 | 26536935 | 1438 |
| QrobMYB57 | Qrob_T0108420.2 | SAAtMYB27 | Qrob_H2.3_Sc000<br>0198 | Chr5 | 33148198 | 33147172 | 1027 |
| QrobMYB58 | Qrob_T0072890.2 | S11       | Qrob_H2.3_Sc000<br>0072 | Chr5 | 40907218 | 40905536 | 1683 |
| QrobMYB59 | Qrob_T0653450.2 | SAAtMYB26 | Qrob_H2.3_Sc000<br>0325 | Chr5 | 45794689 | 45793005 | 1685 |
| QrobMYB60 | Qrob_T0697670.2 | SAAtMYB26 | Qrob_H2.3_Sc000<br>0325 | Chr5 | 45851239 | 45849785 | 1455 |
| QrobMYB61 | Qrob_T0697680.2 | SAAtMYB26 | Qrob_H2.3_Sc000<br>0325 | Chr5 | 45875202 | 45873379 | 1824 |
| QrobMYB62 | Qrob_T0697730.2 | SAAtMYB26 | Qrob_H2.3_Sc000<br>0325 | Chr5 | 45929859 | 45928201 | 1659 |
| QrobMYB63 | Qrob_T0701860.2 | S11       | Qrob_H2.3_Sc000<br>0424 | Chr5 | 65885040 | 65883694 | 1347 |

|            |                 |           |                         |      |          |          |      |
|------------|-----------------|-----------|-------------------------|------|----------|----------|------|
| QrobMYB64  | Qrob_T0058400.2 | S5        | Qrob_H2.3_Sc000<br>0065 | Chr5 | 67078130 | 67081148 | 3019 |
| QrobMYB65  | Qrob_T0577750.2 | S7        | Qrob_H2.3_Sc000<br>0053 | Chr6 | 11404917 | 11400280 | 4638 |
| QrobMYB66  | Qrob_T0005810.2 | S15       | Qrob_H2.3_Sc000<br>0006 | Chr6 | 21152052 | 21153310 | 1259 |
| QrobMYB67  | Qrob_T0047220.2 | S25       | Qrob_H2.3_Sc000<br>0006 | Chr6 | 21502446 | 21504146 | 1701 |
| QrobMYB68  | Qrob_T0379650.2 | SAtMYB71  | Qrob_H2.3_Sc000<br>0566 | Chr6 | 25445570 | 25447050 | 1481 |
| QrobMYB69  | Qrob_T0690000.2 | SAtM46    | Qrob_H2.3_Sc000<br>0565 | Chr6 | 27337413 | 27334918 | 2496 |
| QrobMYB70  | Qrob_T0199530.2 | WPS-I     | Qrob_H2.3_Sc000<br>0179 | Chr6 | 43171185 | 43172069 | 885  |
| QrobMYB71  | Qrob_T0199740.2 | S22       | Qrob_H2.3_Sc000<br>0179 | Chr6 | 43505358 | 43506296 | 939  |
| QrobMYB72  | Qrob_T0346410.2 | S4        | Qrob_H2.3_Sc000<br>0011 | Chr6 | 53280743 | 53279865 | 879  |
| QrobMYB73  | Qrob_T0418350.2 | S10 & S24 | Qrob_H2.3_Sc000<br>0204 | Chr6 | 56246814 | 56245513 | 1302 |
| QrobMYB74  | Qrob_T0738480.2 | S1        | Qrob_H2.3_Sc000<br>0662 | Chr7 | 9584571  | 9583099  | 1473 |
| QrobMYB75  | Qrob_T0119930.2 | SAtMYB71  | Qrob_H2.3_Sc000<br>0123 | Chr7 | 10575199 | 10573946 | 1254 |
| QrobMYB76  | Qrob_T0388360.2 | S14       | Qrob_H2.3_Sc000<br>0367 | Chr7 | 47727255 | 47728879 | 1625 |
| QrobMYB77  | Qrob_T0657180.2 | SAtM91    | Qrob_H2.3_Sc000<br>0478 | Chr7 | 51905061 | 51903988 | 1074 |
| QrobMYB78  | Qrob_T0033520.2 | S9b       | Qrob_H2.3_Sc000<br>0007 | Chr8 | 19882307 | 19880196 | 2112 |
| QrobMYB79  | Qrob_T0626620.2 | S15       | Qrob_H2.3_Sc000<br>0156 | Chr8 | 26379626 | 26380864 | 1239 |
| QrobMYB80  | Qrob_T0647280.2 | S18       | Qrob_H2.3_Sc000<br>0283 | Chr8 | 36441820 | 36438939 | 2882 |
| QrobMYB81  | Qrob_T0654710.2 | WPS-V     | Qrob_H2.3_Sc000<br>0642 | Chr8 | 38444539 | 38445951 | 1413 |
| QrobMYB82  | Qrob_T0668650.2 | WPS-V     | Qrob_H2.3_Sc000<br>0642 | Chr8 | 38539863 | 38541297 | 1435 |
| QrobMYB83  | Qrob_T0668640.2 | WPS-V     | Qrob_H2.3_Sc000<br>0642 | Chr8 | 38597083 | 38598848 | 1766 |
| QrobMYB84  | Qrob_T0466400.2 | S11       | Qrob_H2.3_Sc000<br>0570 | Chr8 | 40545518 | 40544193 | 1326 |
| QrobMYB85  | Qrob_T0436030.2 | S22       | Qrob_H2.3_Sc000<br>0008 | Chr8 | 47999625 | 48000389 | 765  |
| QrobMYB86  | Qrob_T0437590.2 | WPS-II    | Qrob_H2.3_Sc000<br>0334 | Chr8 | 51157045 | 51155572 | 1474 |
| QrobMYB87  | Qrob_T0303790.2 | S23       | Qrob_H2.3_Sc000<br>0251 | Chr8 | 66214685 | 66211087 | 3599 |
| QrobMYB88  | Qrob_T0411100.2 | S21       | Qrob_H2.3_Sc000<br>0251 | Chr8 | 66330876 | 66332389 | 1514 |
| QrobMYB89  | Qrob_T0277200.2 | S21       | Qrob_H2.3_Sc000<br>0457 | Chr9 | 4255611  | 4253903  | 1709 |
| QrobMYB90  | Qrob_T0344270.2 | S5        | Qrob_H2.3_Sc000<br>0600 | Chr9 | 5365424  | 5366566  | 1143 |
| QrobMYB91  | Qrob_T0344260.2 | S5        | Qrob_H2.3_Sc000<br>0600 | Chr9 | 5379324  | 5380656  | 1333 |
| QrobMYB92  | Qrob_T0344200.2 | S4        | Qrob_H2.3_Sc000<br>0600 | Chr9 | 5457882  | 5456407  | 1476 |
| QrobMYB93  | Qrob_T0191710.2 | S5        | Qrob_H2.3_Sc000<br>0155 | Chr9 | 7921886  | 7920786  | 1101 |
| QrobMYB94  | Qrob_T0612820.2 | S16       | Qrob_H2.3_Sc000<br>0047 | Chr9 | 14775500 | 14778940 | 3441 |
| QrobMYB95  | Qrob_T0612850.2 | S9b       | Qrob_H2.3_Sc000<br>0047 | Chr9 | 14807889 | 14810821 | 2933 |
| QrobMYB96  | Qrob_T0575950.2 | S2 & S3   | Qrob_H2.3_Sc000<br>0017 | Chr9 | 17357797 | 17359638 | 1842 |
| QrobMYB97  | Qrob_T0246270.2 | SAtMYB88  | Qrob_H2.3_Sc000<br>0017 | Chr9 | 19640731 | 19634180 | 6552 |
| QrobMYB98  | Qrob_T0464600.2 | SAtMYB85  | Qrob_H2.3_Sc000<br>0446 | Chr9 | 20541214 | 20543134 | 1921 |
| QrobMYB99  | Qrob_T0123830.2 | S10 & S24 | Qrob_H2.3_Sc000<br>0112 | Chr9 | 24701012 | 24702528 | 1517 |
| QrobMYB100 | Qrob_T0460820.2 | S21       | Qrob_H2.3_Sc000<br>0152 | Chr9 | 29184636 | 29183320 | 1317 |
| QrobMYB101 | Qrob_T0369530.2 | S2 & S3   | Qrob_H2.3_Sc000<br>0031 | Chr9 | 36883092 | 36884669 | 1578 |

|           |                 |             |                 |       |          |          |      |
|-----------|-----------------|-------------|-----------------|-------|----------|----------|------|
| QrobMYB10 |                 |             | Qrob_H2.3_Sc000 |       |          |          |      |
| 2         | Qrob_T0612260.2 | S14         | 0097            | Chr9  | 48108561 | 48107270 | 1292 |
| QrobMYB10 |                 |             | Qrob_H2.3_Sc000 |       |          |          |      |
| 3         | Qrob_T0381310.2 | SAtMYB27    | 0278            | Chr10 | 8229312  | 8230354  | 1043 |
| QrobMYB10 |                 |             | Qrob_H2.3_Sc000 |       |          |          |      |
| 4         | Qrob_T0451690.2 | S13         | 0669            | Chr10 | 10999232 | 11000574 | 1343 |
| QrobMYB10 |                 |             | Qrob_H2.3_Sc000 |       |          |          |      |
| 5         | Qrob_T0452180.2 | S1          | 0085            | Chr10 | 14501122 | 14502632 | 1511 |
| QrobMYB10 |                 |             | Qrob_H2.3_Sc000 |       |          |          |      |
| 6         | Qrob_T0555330.2 | no subgroup | 0085            | Chr10 | 14962232 | 14966952 | 4721 |
| QrobMYB10 |                 |             | Qrob_H2.3_Sc000 |       |          |          |      |
| 7         | Qrob_T0555340.2 | no subgroup | 0085            | Chr10 | 14980766 | 14983349 | 2584 |
| QrobMYB10 |                 |             | Qrob_H2.3_Sc000 |       |          |          |      |
| 8         | Qrob_T0179590.2 | SAtMYB26    | 0951            | Chr10 | 17804921 | 17803483 | 1439 |
| QrobMYB10 |                 |             | Qrob_H2.3_Sc000 |       |          |          |      |
| 9         | Qrob_T0286880.2 | S2 & S3     | 0009            | Chr10 | 18999043 | 18995821 | 3223 |
| QrobMYB11 |                 |             | Qrob_H2.3_Sc000 |       |          |          |      |
| 0         | Qrob_T0361180.2 | S20         | 0450            | Chr10 | 24976888 | 24978282 | 1395 |
| QrobMYB11 |                 |             | Qrob_H2.3_Sc000 |       |          |          |      |
| 1         | Qrob_T0352280.2 | WPS-III     | 0347            | Chr10 | 27861855 | 27860633 | 1223 |
| QrobMYB11 |                 |             | Qrob_H2.3_Sc000 |       |          |          |      |
| 2         | Qrob_T0439830.2 | WPS-III     | 0347            | Chr10 | 27882273 | 27881283 | 991  |
| QrobMYB11 |                 |             | Qrob_H2.3_Sc000 |       |          |          |      |
| 3         | Qrob_T0309480.2 | S21         | 0263            | Chr10 | 33715578 | 33714210 | 1369 |
| QrobMYB11 |                 |             | Qrob_H2.3_Sc000 |       |          |          |      |
| 4         | Qrob_T0416480.2 | S21         | 0394            | Chr10 | 40481766 | 40480595 | 1172 |
| QrobMYB11 |                 |             | Qrob_H2.3_Sc000 |       |          |          |      |
| 5         | Qrob_T0189820.2 | S5          | 0253            | Chr11 | 588966   | 587658   | 1309 |
| QrobMYB11 |                 |             | Qrob_H2.3_Sc000 |       |          |          |      |
| 6         | Qrob_T0189800.2 | S5          | 0253            | Chr11 | 618203   | 616862   | 1342 |
| QrobMYB11 |                 |             | Qrob_H2.3_Sc000 |       |          |          |      |
| 7         | Qrob_T0189780.2 | S5          | 0253            | Chr11 | 640279   | 638759   | 1521 |
| QrobMYB11 |                 |             | Qrob_H2.3_Sc000 |       |          |          |      |
| 8         | Qrob_T0275930.2 | WPS-III     | 0230            | Chr11 | 3182332  | 3181117  | 1216 |
| QrobMYB11 |                 |             | Qrob_H2.3_Sc000 |       |          |          |      |
| 9         | Qrob_T0409250.2 | SAtMYB26    | 0166            | Chr11 | 10466232 | 10465025 | 1208 |
| QrobMYB12 |                 |             | Qrob_H2.3_Sc000 |       |          |          |      |
| 0         | Qrob_T0203780.2 | S22         | 0089            | Chr11 | 23625175 | 23624288 | 888  |
| QrobMYB12 |                 |             | Qrob_H2.3_Sc000 |       |          |          |      |
| 1         | Qrob_T0011720.2 | S4          | 0005            | Chr11 | 35738109 | 35739384 | 1276 |
| QrobMYB12 |                 |             | Qrob_H2.3_Sc000 |       |          |          |      |
| 2         | Qrob_T0291490.2 | S13         | 0266            | Chr11 | 43032216 | 43033889 | 1674 |
| QrobMYB12 |                 |             | Qrob_H2.3_Sc000 |       |          |          |      |
| 3         | Qrob_T0387070.2 | S4          | 0389            | Chr11 | 45113992 | 45112970 | 1023 |
| QrobMYB12 |                 |             | Qrob_H2.3_Sc000 |       |          |          |      |
| 4         | Qrob_T0099630.2 | S5          | 0037            | Chr11 | 51663438 | 51665216 | 1779 |
| QrobMYB12 |                 |             | Qrob_H2.3_Sc000 |       |          |          |      |
| 5         | Qrob_T0302600.2 | S10 & S24   | 0235            | Chr12 | 6308619  | 6309765  | 1147 |
| QrobMYB12 |                 |             | Qrob_H2.3_Sc000 |       |          |          |      |
| 6         | Qrob_T0541420.2 | SAtMYB85    | 0023            | Chr12 | 9014270  | 9012796  | 1475 |
| QrobMYB12 |                 |             | Qrob_H2.3_Sc000 |       |          |          |      |
| 7         | Qrob_T0082290.2 | S20         | 0412            | Chr12 | 16016899 | 16018134 | 1236 |
| QrobMYB12 |                 |             | Qrob_H2.3_Sc000 |       |          |          |      |
| 8         | Qrob_T0115630.2 | SAtM5       | 0146            | Chr12 | 25663954 | 25662876 | 1079 |
| QrobMYB12 |                 |             | Qrob_H2.3_Sc000 |       |          |          |      |
| 9         | Qrob_T0388890.2 | SAtM103     | 0652            | Chr12 | 30990081 | 30992496 | 2416 |
| QrobMYB13 |                 |             | Qrob_H2.3_Sc000 |       |          |          |      |
| 0         | Qrob_T0026160.2 | S20         | 0044            | UA    | 1660115  | 1661281  | 1167 |
| QrobMYB13 |                 |             | Qrob_H2.3_Sc000 |       |          |          |      |
| 1         | Qrob_T0468060.2 | S22         | 0161            | UA    | 1159605  | 1158892  | 714  |
| QrobMYB13 |                 |             | Qrob_H2.3_Sc000 |       |          |          |      |
| 2         | Qrob_T0675440.2 | SAtMYB26    | 0165            | UA    | 1378120  | 1376578  | 1543 |
| QrobMYB13 |                 |             | Qrob_H2.3_Sc000 |       |          |          |      |
| 3         | Qrob_T0675450.2 | SAtMYB26    | 0165            | UA    | 1418714  | 1417338  | 1377 |
| QrobMYB13 |                 |             | Qrob_H2.3_Sc000 |       |          |          |      |
| 4         | Qrob_T0122500.2 | S18         | 0234            | UA    | 176552   | 171484   | 5069 |
| QrobMYB13 |                 |             | Qrob_H2.3_Sc000 |       |          |          |      |
| 5         | Qrob_T0411820.2 | SAtM5       | 0354            | UA    | 342530   | 343605   | 1076 |
| QrobMYB13 |                 |             | Qrob_H2.3_Sc000 |       |          |          |      |
| 6         | Qrob_T0412190.2 | WPS-IV      | 0358            | UA    | 390490   | 388344   | 2147 |
| QrobMYB13 |                 |             | Qrob_H2.3_Sc000 |       |          |          |      |
| 7         | Qrob_T0728290.2 | S13         | 0840            | UA    | 172040   | 170522   | 1519 |
| QrobMYB13 |                 |             | Qrob_H2.3_Sc000 |       |          |          |      |
| 8         | Qrob_T0653500.2 | SAtMYB26    | 0945            | UA    | 11717    | 13539    | 1823 |
| QrobMYB13 |                 |             | Qrob_H2.3_Sc000 |       |          |          |      |
| 9         | Qrob_T0769430.2 | WPS-III     | 1151            | UA    | 32240    | 33455    | 1216 |



|           |                 |        |                 |       |          |          |      |
|-----------|-----------------|--------|-----------------|-------|----------|----------|------|
| QrobMYB3R |                 |        | Qrob_H2.3_Sc000 |       |          |          |      |
| -A        | Qrob_T0010150.2 | MYB-3R | 0013            | Chr2  | 60246757 | 60253755 | 6999 |
| QrobMYB3R |                 |        | Qrob_H2.3_Sc000 |       |          |          |      |
| -B        | Qrob_T0576750.2 | MYB-3R | 0478            | Chr7  | 51811899 | 51816721 | 4823 |
| QrobMYB3R |                 |        | Qrob_H2.3_Sc000 |       |          |          |      |
| -C        | Qrob_T0033120.2 | MYB-3R | 0007            | Chr8  | 20517700 | 20521806 | 4107 |
| QrobMYB3R |                 |        | Qrob_H2.3_Sc000 |       |          |          |      |
| -D        | Qrob_T0129360.2 | MYB-3R | 0474            | Chr12 | 14949147 | 14953664 | 4518 |
| QrobMYB3R |                 |        | Qrob_H2.3_Sc000 |       |          |          |      |
| -E        | Qrob_T0264880.2 | MYB-3R | 0046            | Chr12 | 22045628 | 22052297 | 6670 |
| QrobMYB4R |                 |        | Qrob_H2.3_Sc000 |       |          |          |      |
| -A        | Qrob_T0439780.2 | MYB-4R | 0347            | Chr10 | 28525076 | 28534063 | 8988 |

---

1989 **Supplementary Table 35 Gene content of the glutaredoxin, thioredoxin and glutathione transferase families in the pedunculate oak**  
 1990 **genome (haplome assembly) and selected embryophytes.** In addition to oak sequences, other sequences were retrieved from genomic data  
 1991 available from the Phytozome V11 portal by BLAST-p and tBLAST-n analyses using *P. trichocarpa* and *A. thaliana* sequences as references.  
 1992 The different classes in the grx, trx and gst families were defined according to<sup>83-85</sup>, respectively.

|                      | <i>Q. robur</i> | <i>P. trichocarpa</i> | <i>A. thaliana</i> | <i>V. vinifera</i> | <i>P. persica</i> | <i>C. clementina</i> | <i>F. vesca</i> | <i>E. grandis</i> | <i>R. communis</i> | <i>C. papaya</i> | <i>T. cacao</i> | <i>O. sativa</i> | <i>S. bicolor</i> | <i>P. patens</i> |
|----------------------|-----------------|-----------------------|--------------------|--------------------|-------------------|----------------------|-----------------|-------------------|--------------------|------------------|-----------------|------------------|-------------------|------------------|
| <b>GLUTAREDOXINS</b> | 25              | 38                    | 33                 | 25                 | 24                | 23                   | 24              | 32                | 22                 | 18               | 17              | 29               | 32                | 15               |
| Class I              | 5               | 6                     | 6                  | 5                  | 5                 | 5                    | 4               | 7                 | 6                  | 4                | 5               | 5                | 5                 | 5                |
| C1                   | 1               | 2                     | 1                  | 1                  | 1                 | 1                    | 1               | 2                 | 1                  | 0                | 1               | 0                | 0                 | 0                |
| C2                   | 1               | 1                     | 1                  | 1                  | 1                 | 1                    | 1               | 2                 | 1                  | 1                | 1               | 2                | 2                 | 3                |
| C3                   | 1               | 1                     | 1                  | 1                  | 1                 | 1                    | 1               | 1                 | 1                  | 1                | 1               | 1                | 1                 | 1                |
| C4                   | 1               | 1                     | 1                  | 1                  | 1                 | 1                    | 1               | 1                 | 1                  | 1                | 1               | 1                | 1                 | 0                |
| C5                   | 0               | 0                     | 1                  | 0                  | 0                 | 0                    | 0               | 0                 | 0                  | 0                | 0               | 0                | 0                 | 0                |
| S12                  | 1               | 1                     | 1                  | 1                  | 1                 | 1                    | 0               | 1                 | 2                  | 1                | 1               | 1                | 1                 | 1                |
| Class II             | 4               | 5                     | 4                  | 5                  | 5                 | 4                    | 3               | 5                 | 4                  | 3                | 4               | 5                | 6                 | 8                |
| S14                  | 1               | 1                     | 1                  | 2                  | 1                 | 1                    | 1               | 1                 | 1                  | 0                | 1               | 1                | 1                 | 2                |
| S15                  | 1               | 1                     | 1                  | 1                  | 2                 | 1                    | 0               | 2                 | 1                  | 1                | 1               | 2                | 2                 | 2                |
| S16                  | 1               | 1                     | 1                  | 1                  | 1                 | 1                    | 1               | 1                 | 1                  | 1                | 1               | 1                | 2                 | 1                |
| S17                  | 1               | 2                     | 1                  | 1                  | 1                 | 1                    | 1               | 1                 | 1                  | 1                | 1               | 1                | 1                 | 3                |
| Class III            | 14              | 24                    | 21                 | 13                 | 12                | 12                   | 15              | 18                | 10                 | 9                | 11              | 17               | 19                | 2                |
| Class IV             | 2               | 3                     | 2                  | 2                  | 2                 | 2                    | 2               | 2                 | 2                  | 2                | 2               | 2                | 2                 | 0                |
| <b>THIOREDOXINS</b>  | 41              | 49                    | 41                 | 35                 | 39                | 31                   | 34              | 48                | 31                 | 30               | 36              | 34               | 33                | 34               |
| CDSP32               | 1               | 1                     | 1                  | 1                  | 1                 | 1                    | 1               | 1                 | 1                  | 1                | 1               | 1                | 1                 | 1                |
| Clot                 | 1               | 1                     | 1                  | 1                  | 1                 | 1                    | 1               | 1                 | 1                  | 0                | 1               | 1                | 1                 | 1                |
| HCF164               | 1               | 1                     | 1                  | 1                  | 1                 | 1                    | 1               | 1                 | 1                  | 1                | 1               | 1                | 1                 | 1                |
| Trx f                | 1               | 1                     | 2                  | 1                  | 1                 | 1                    | 1               | 2                 | 1                  | 1                | 1               | 1                | 1                 | 3                |
| Trx h                | 6               | 10                    | 11                 | 6                  | 8                 | 6                    | 8               | 10                | 6                  | 8                | 8               | 7                | 6                 | 5                |
| Trx m                | 4               | 8                     | 4                  | 3                  | 5                 | 3                    | 4               | 4                 | 4                  | 3                | 4               | 4                | 3                 | 6                |
| Trx o                | 1               | 1                     | 2                  | 1                  | 1                 | 1                    | 1               | 1                 | 1                  | 1                | 1               | 1                | 1                 | 1                |
| Trx x                | 1               | 1                     | 1                  | 1                  | 1                 | 1                    | 1               | 1                 | 0                  | 1                | 1               | 1                | 1                 | 2                |

|                                 |           |           |           |           |           |           |           |            |           |           |           |           |           |           |
|---------------------------------|-----------|-----------|-----------|-----------|-----------|-----------|-----------|------------|-----------|-----------|-----------|-----------|-----------|-----------|
| Trx y                           | 1         | 2         | 2         | 1         | 2         | 1         | 1         | 2          | 1         | 1         | 1         | 1         | 1         | 1         |
| Trx z                           | 1         | 1         | 1         | 1         | 1         | 1         | 1         | 1          | 1         | 1         | 1         | 1         | 1         | 2         |
| Trx like 1                      | 1         | 1         | 1         | 1         | 1         | 1         | 1         | 1          | 1         | 0         | 1         | 1         | 1         | 1         |
| Trx like 2                      | 2         | 3         | 2         | 2         | 2         | 2         | 2         | 2          | 1         | 1         | 2         | 1         | 2         | 2         |
| Trx liliium 1                   | 2         | 2         | 3         | 2         | 2         | 2         | 3         | 3          | 2         | 2         | 2         | 2         | 3         | 0         |
| Trx liliium 2                   | 1         | 2         | 1         | 1         | 1         | 1         | 1         | 2          | 1         | 1         | 2         | 1         | 1         | 1         |
| Trx liliium 3                   | 1         | 1         | 1         | 1         | 1         | 1         | 1         | 1          | 1         | 1         | 1         | 1         | 1         | 1         |
| TDX                             | 1         | 2         | 1         | 1         | 1         | 0         | 1         | 1          | 1         | 0         | 1         | 1         | 0         | 0         |
| NRX1                            | 5         | 5         | 1         | 5         | 4         | 2         | 0         | 7          | 2         | 3         | 1         | 2         | 2         | 0         |
| NRX2                            | 1         | 1         | 0         | 1         | 1         | 1         | 1         | 2          | 1         | 1         | 1         | 1         | 1         | 0         |
| NRX3                            | 1         | 1         | 1         | 1         | 1         | 1         | 1         | 1          | 0         | 1         | 1         | 1         | 1         | 0         |
| NTRa/b                          | 6         | 2         | 2         | 1         | 1         | 1         | 1         | 2          | 2         | 1         | 2         | 2         | 2         | 2         |
| NTRc                            | 1         | 1         | 1         | 1         | 1         | 1         | 1         | 1          | 1         | 1         | 1         | 1         | 1         | 2         |
| FTR-b                           | 1         | 1         | 1         | 1         | 1         | 1         | 1         | 1          | 1         | 0         | 1         | 1         | 1         | 2         |
| <b>GLUTATHIONE TRANSFERASES</b> | <b>88</b> | <b>83</b> | <b>61</b> | <b>59</b> | <b>71</b> | <b>68</b> | <b>50</b> | <b>110</b> | <b>52</b> | <b>36</b> | <b>60</b> | <b>78</b> | <b>90</b> | <b>39</b> |
| DHAR                            | 1         | 3         | 3         | 2         | 2         | 2         | 2         | 3          | 3         | 2         | 2         | 2         | 3         | 3         |
| GHR                             | 2         | 2         | 4         | 1         | 2         | 2         | 2         | 3          | 2         | 0         | 3         | 2         | 2         | 2         |
| GSTL                            | 2         | 3         | 3         | 4         | 2         | 3         | 3         | 8          | 3         | 2         | 2         | 3         | 4         | 1         |
| mPGES2                          | 2         | 3         | 1         | 2         | 2         | 2         | 2         | 3          | 1         | 1         | 2         | 1         | 1         | 2         |
| GSTI                            | 0         | 0         | 0         | 0         | 0         | 0         | 0         | 0          | 0         | 0         | 0         | 0         | 0         | 1         |
| GSTH                            | 0         | 0         | 0         | 0         | 0         | 0         | 0         | 0          | 0         | 0         | 0         | 0         | 0         | 7         |
| GSTF                            | 12        | 8         | 13        | 8         | 9         | 8         | 5         | 19         | 4         | 5         | 9         | 16        | 17        | 9         |
| GSTT                            | 1         | 2         | 3         | 1         | 1         | 2         | 1         | 1          | 3         | 1         | 1         | 1         | 2         | 2         |
| GSTZ                            | 2         | 2         | 2         | 3         | 2         | 3         | 2         | 2          | 2         | 1         | 2         | 4         | 4         | 1         |
| EF1By                           | 2         | 3         | 2         | ?         | 2         | 2         | 3         | 1          | 1         | 1         | 1         | 2         | 2         | 3         |
| Ure2p                           | 0         | 0         | 0         | 0         | 0         | 0         | 0         | 0          | 0         | 0         | 0         | 0         | 0         | 1         |
| Metaxin                         | 1         | 2         | 1         | 1         | 1         | 1         | 1         | 1          | 1         | 1         | 1         | 1         | 1         | 2         |
| GSTU                            | 62        | 54        | 28        | 36        | 47        | 42        | 28        | 62         | 31        | 21        | 36        | 45        | 53        | 0         |
| TCHQD                           | 1         | 1         | 1         | 1         | 1         | 1         | 1         | 7          | 1         | 1         | 1         | 1         | 1         | 5         |

1993 **Supplementary Table 36 List of MLO genes identified in the pedunculate oak genome**  
 1994 **(haplome assembly).** MLO predicted proteins were retrieved by three different approaches:  
 1995 those automatically annotated as MLO proteins, those containing the MLO domain with the  
 1996 Pfam signature PF03094, and those with homology to one of the *Arabidopsis* MLO proteins  
 1997 after BLAST-p search using an e-value of  $10e^{-10}$  as the threshold. The predicted proteins  
 1998 identified were inspected and manually curated. The number of predicted transmembrane  
 1999 domains was analyzed with Phobius (<http://phobius.sbc.su.se/>).

2000

| MLO gene ID     | Complete/partial protein | MLO Clade | Chrom.    | #residues | exons | #Trans membrane domains |
|-----------------|--------------------------|-----------|-----------|-----------|-------|-------------------------|
| Qrob_T0355750.2 | complete                 | VI        | 1         | 561       | 15    | 7                       |
| Qrob_T0355780.2 | complete                 | V         | 1         | 584       | 15    | 7                       |
| Qrob_T0355790.2 | complete                 | V         | 1         | 585       | 15    | 7                       |
| Qrob_T0173130.2 | complete                 | I         | 2         | 519       | 13    | 7                       |
| Qrob_T0222290.2 | complete                 | II        | 2         | 510       | 15    | 7                       |
| Qrob_T0482700.2 | complete                 | III       | 2         | 522       | 15    | 7                       |
| Qrob_T0725960.2 | partial                  |           | 2         |           |       |                         |
| Qrob_T0725970.2 | partial                  |           | 2         |           |       |                         |
| Qrob_T0562700.2 | complete                 | II        | 5         | 504       | 15    | 8                       |
| Qrob_T0346330.2 | complete                 | I         | 6         | 564       | 15    | 7                       |
| Qrob_T0603780.2 | complete                 | III       | 6         | 573       | 15    | 7                       |
| Qrob_T0327490.2 | partial                  |           | 7         |           |       |                         |
| Qrob_T0455210.2 | complete                 | V         | 8         | 565       | 15    | 7                       |
| Qrob_T0468620.2 | complete                 | I         | 8         | 558       | 15    | 7                       |
| Qrob_T0572110.2 | complete                 | V         | 8         | 539       | 14    | 7                       |
| Qrob_T0572120.2 | complete                 | V         | 8         | 533       | 14    | 7                       |
| Qrob_T0572170.2 | complete                 | V         | 8         | 575       | 15    | 7                       |
| Qrob_T0032420.2 | complete                 | II        | 10        | 516       | 14    | 7                       |
| Qrob_T0032520.2 | complete                 | II        | 10        | 520       | 14    | 7                       |
| Qrob_T0032530.2 | complete                 | II        | 10        | 521       | 14    | 7                       |
| Qrob_T0254270.2 | complete                 | V         | 10        | 557       | 15    | 7                       |
| Qrob_T0254250.2 | partial                  |           | 10        |           |       |                         |
| Qrob_T0254260.2 | partial                  |           | 10        |           |       |                         |
| Qrob_T0032510.2 | partial                  |           | 10        |           |       |                         |
| Qrob_T0254290.2 | partial                  |           | 11        |           |       |                         |
| Qrob_T0523040.2 | complete                 | II        | Scaf. 408 | 505       | 15    | 7                       |

2001

2002

2003 **Supplementary Table 37 Mildew resistance locus o (MLO) family members from**  
 2004 **selected plant species and their phylogenetic classification<sup>a</sup>.** Clade V (in bold) corresponds  
 2005 to the clade for which a function in powdery mildew susceptibility/resistance has been  
 2006 demonstrated. We completed the table provided by Acevedo-Garcia et al.<sup>91</sup> with recently  
 2007 published data and data obtained from the pedunculate oak genome (haplome assembly).

2008

| Scientific name             | Common name | #MLO genes      | Clade ID |    |     |    |           |    |     | Reference*     |
|-----------------------------|-------------|-----------------|----------|----|-----|----|-----------|----|-----|----------------|
|                             |             |                 | I        | II | III | IV | <b>V</b>  | VI | VII |                |
| <i>Arabidopsis thaliana</i> | Thale cress | 15              | 3        | 3  | 5   | 0  | <b>3</b>  | 1  | 0   | <sup>161</sup> |
| <i>Cucumis lanatus</i>      | Cucumber    | 14              | 4        | 1  | 3   | 0  | <b>3</b>  | 1  | 2   | <sup>162</sup> |
| <i>Cucumis sativus</i>      | Cucumber    | 14              | 4        | 2  | 3   | 0  | <b>3</b>  | 1  | 1   | <sup>163</sup> |
| <i>Fragaria vesca</i>       | Strawberry  | 18              | 3        | 6  | 1   | 1  | <b>3</b>  | 2  | 1   | <sup>92</sup>  |
| <i>Glycine max</i>          | Soybean     | 39 <sup>c</sup> | 7        | 5  | 8   | 2  | <b>11</b> | 6  | 0   | <sup>164</sup> |
| <i>Gossypium hirsutum</i>   | Cotton      | 38 <sup>c</sup> | 8        | 11 | 3   | 2  | <b>8</b>  | 2  | 4   | <sup>165</sup> |
| <i>Malus domestica</i>      | Apple       | 21 <sup>c</sup> | 5        | 5  | 3   | 0  | <b>4</b>  | 2  | 1   | <sup>92</sup>  |
| <i>Oryza sativa</i>         | Rice        | 12              | 2        | 6  | 1   | 3  | <b>0</b>  | 0  | 0   | <sup>166</sup> |
| <i>Prunus persica</i>       | Peach       | 16              | 3        | 6  | 2   | 0  | <b>3</b>  | 2  | 0   | <sup>167</sup> |
| <i>Prunus persica</i>       | Peach       | 19              | 3        | 5  | 2   | 1  | <b>3</b>  | 3  | 1   | <sup>92</sup>  |
| <i>Solanum lycopersicum</i> | Tomato      | 17 <sup>b</sup> | 3        | 4  | 3   | 0  | <b>4</b>  | 1  | 1   | <sup>168</sup> |
| <i>Solanum tuberosum</i>    | Potato      | 13              | 3        | 4  | 3   | 0  | <b>3</b>  | 0  | 0   | <sup>169</sup> |
| <i>Triticum aestivum</i>    | Wheat       | 8               | 1        | 3  | 1   | 3  | <b>0</b>  | 0  | 0   | <sup>170</sup> |
| <i>Vitis vinifera</i>       | Grapevine   | 17              | 3        | 3  | 2   | 1  | <b>6</b>  | 2  | 0   | <sup>171</sup> |
| <b><i>Quercus robur</i></b> | <b>Oak</b>  | 19              | 3        | 6  | 2   | 0  | <b>7</b>  | 1  | 0   | this study     |

2009 <sup>a</sup> Only fully characterized MLO families are shown. Classification is based on previous publications.

2010 <sup>b</sup> One truncated MLO family member (SIMLO14) was excluded from phylogenetic analysis

2011 <sup>c</sup> Species with recent whole-genome duplication

2012 \* from Acevedo-Garcia et al.<sup>91</sup> until 2014

2013

2014

2015 **Supplementary Table 38 Annotation of the *Populus trichocarpa* laccase genes.** Poplar laccase gene annotations were updated according to the  
 2016 most recent annotation (v3) available in Phytozome. Synonyms of the gene annotations used in this study are presented, together with previous  
 2017 annotations based on Phytozome v2 annotation.

| Annotation <sup>132</sup> | Annotation <sup>129</sup> | Synonym (Annotation v2) | <i>P. trichocarpa</i> Alias | Gene name (v3)   | Transcript name (v3) |
|---------------------------|---------------------------|-------------------------|-----------------------------|------------------|----------------------|
| PtrLAC1                   | PtrLAC1                   | POPTR_0001s14010        | PtrLAC1                     | Potri.001G054600 | Potri.001G054600.1   |
| PtrLAC2                   | PtrLAC2                   | POPTR_0001s18500        | PtrLAC2                     | Potri.001G184300 | Potri.001G184300.1   |
| PtrLAC3                   | PtrLAC3                   | POPTR_0001s21380        | PtrLAC3                     | Potri.001G206200 | Potri.001G206200.1   |
| PtrLAC4                   | PtrLAC4                   | POPTR_0001s25580        | PtrLAC4                     | Potri.001G248700 | Potri.001G248700.1   |
| PtrLAC5                   | PtrLAC5                   | POPTR_0001s35740        | PtrLAC5                     | Potri.001G341600 | Potri.001G341600.1   |
| PtrLAC6                   | PtrLAC6                   | POPTR_0001s41160        | PtrLAC6                     | Potri.001G401100 | Potri.001G401100.1   |
| PtrLAC7                   | PtrLAC7                   | POPTR_0001s41170        | PtrLAC7                     | Potri.001G401300 | Potri.001G401300.1   |
| PtrLAC8                   | PtrLAC8                   | POPTR_0004s16370        | PtrLAC8                     | Potri.004G156400 | Potri.004G156400.1   |
|                           | PtrLAC9                   | POPTR_0005s22230        | PtrLAC9                     | Potri.005G200500 | Potri.005G200500.1   |
| PtrLAC9                   | PtrLAC10                  | POPTR_0005s22240        | PtrLAC10                    | Potri.005G200600 | Potri.005G200600.1   |
| PtrLAC10                  | PtrLAC11                  | POPTR_0005s22250        | PtrLAC11                    | Potri.005G200700 | Potri.005G200700.1   |
| PtrLAC11                  | PtrLAC12                  | POPTR_0006s08740        | PtrLAC12                    | Potri.006G087100 | Potri.006G087100.1   |
| PtrLAC12                  | PtrLAC13                  | POPTR_0006s08780        | PtrLAC13                    | Potri.006G087500 | Potri.006G087500.1   |
| PtrLAC13                  | PtrLAC14                  | POPTR_0006s09520        | PtrLAC14                    | Potri.006G094100 | Potri.006G094100.1   |
| PtrLAC14                  | PtrLAC15                  | POPTR_0006s09830        | PtrLAC15                    | Potri.006G096900 | Potri.006G096900.1   |
| PtrLAC15                  | PtrLAC16                  | POPTR_0006s09840        | PtrLAC16                    | Potri.006G097000 | Potri.006G097000.1   |
| PtrLAC49                  | PtrLAC51                  | POPTR_0958s00200        | PtrLAC17                    | Potri.006G097100 | Potri.006G097100.1   |

|          |          |                  |          |                  |                    |
|----------|----------|------------------|----------|------------------|--------------------|
| PtrLAC16 | PtrLAC17 | POPTR_0007s13050 | PtrLAC18 | Potri.007G023300 | Potri.007G023300.1 |
| PtrLAC17 | PtrLAC18 | POPTR_0008s06430 | PtrLAC19 | Potri.008G064000 | Potri.008G064000.1 |
| PtrLAC18 | PtrLAC19 | POPTR_0008s07370 | PtrLAC20 | Potri.008G073700 | Potri.008G073700.1 |
| PtrLAC19 | PtrLAC20 | POPTR_0008s07380 | PtrLAC21 | Potri.008G073800 | Potri.008G073800.1 |
| PtrLAC20 | PtrLAC21 | POPTR_0009s03940 | PtrLAC22 | Potri.009G034500 | Potri.009G034500.1 |
| PtrLAC21 | PtrLAC22 | POPTR_0009s04720 | PtrLAC23 | Potri.009G042500 | Potri.009G042500.1 |
| PtrLAC22 | PtrLAC23 | POPTR_0009s10550 | PtrLAC24 | Potri.009G102700 | Potri.009G102700.1 |
| PtrLAC23 | PtrLAC24 | POPTR_0009s15840 | PtrLAC25 | Potri.009G156600 | Potri.009G156600.1 |
| PtrLAC24 | PtrLAC25 | POPTR_0009s15860 | PtrLAC26 | Potri.009G156800 | Potri.009G156800.1 |
| PtrLAC25 | PtrLAC26 | POPTR_0010s19080 | PtrLAC27 | Potri.010G183500 | Potri.010G183500.1 |
| PtrLAC26 | PtrLAC27 | POPTR_0010s19090 | PtrLAC28 | Potri.010G183600 | Potri.010G183600.1 |
| PtrLAC27 | PtrLAC28 | POPTR_0010s20050 | PtrLAC29 | Potri.010G193100 | Potri.010G193100.1 |
| PtrLAC28 | PtrLAC29 | POPTR_0011s06880 | PtrLAC30 | Potri.011G071100 | Potri.011G071100.1 |
| PtrLAC29 | PtrLAC30 | POPTR_0011s12090 | PtrLAC31 | Potri.011G120200 | Potri.011G120200.1 |
| PtrLAC30 | PtrLAC31 | POPTR_0011s12100 | PtrLAC32 | Potri.011G120300 | Potri.011G120300.1 |
| PtrLAC31 | PtrLAC32 | POPTR_0012s04620 | PtrLAC33 | Potri.012G048900 | Potri.012G048900.1 |
| PtrLAC32 | PtrLAC33 | POPTR_0013s14890 | PtrLAC34 | Potri.013G152700 | Potri.013G152700.1 |
| PtrLAC33 | PtrLAC34 | POPTR_0014s09610 | PtrLAC35 | Potri.014G100600 | Potri.014G100600.1 |
| PtrLAC36 | PtrLAC38 | POPTR_0015s04370 | PtrLAC36 | Potri.015G040400 | Potri.015G040400.1 |
| PtrLAC35 | PtrLAC37 | POPTR_0015s04350 | PtrLAC37 | Potri.015G040600 | Potri.015G040600.1 |
| PtrLAC34 | PtrLAC36 | POPTR_0015s04340 | PtrLAC38 | Potri.015G040700 | Potri.015G040700.1 |
|          | PtrLAC35 | POPTR_0015s04330 | PtrLAC39 | Potri.015G040800 | Potri.015G040800.1 |
| PtrLAC37 | PtrLAC39 | POPTR_0016s11500 | PtrLAC40 | Potri.016G106000 | Potri.016G106000.1 |

|          |          |                  |          |                  |                    |
|----------|----------|------------------|----------|------------------|--------------------|
| PtrLAC38 | PtrLAC40 | POPTR_0016s11520 | PtrLAC41 | Potri.016G106100 | Potri.016G106100.1 |
| PtrLAC39 | PtrLAC41 | POPTR_0016s11540 | PtrLAC42 | Potri.016G106300 | Potri.016G106300.1 |
| PtrLAC48 | PtrLAC50 | POPTR_0091s00270 | PtrLAC43 | Potri.016G107900 | Potri.016G107900.1 |
| PtrLAC40 | PtrLAC42 | POPTR_0016s11950 | PtrLAC44 | Potri.016G112000 | Potri.016G112000.1 |
| PtrLAC41 | PtrLAC43 | POPTR_0016s11960 | PtrLAC45 | Potri.016G112100 | Potri.016G112100.1 |
| PtrLAC42 | PtrLAC44 | POPTR_0019s11810 | PtrLAC46 | Potri.019G088500 | Potri.019G088500.1 |
| PtrLAC43 | PtrLAC45 | POPTR_0019s11820 | PtrLAC47 | Potri.019G088600 | Potri.019G088600.1 |
| PtrLAC44 | PtrLAC46 | POPTR_0019s11830 | PtrLAC48 | Potri.019G088700 | Potri.019G088700.1 |
| PtrLAC45 | PtrLAC47 | POPTR_0019s11850 | PtrLAC49 | Potri.019G088800 | Potri.019G088800.1 |
| PtrLAC46 | PtrLAC48 | POPTR_0019s11860 | PtrLAC50 | Potri.019G088900 | Potri.019G088900.1 |
| PtrLAC47 | PtrLAC49 | POPTR_0019s14530 | PtrLAC51 | Potri.019G121700 | Potri.019G121700.1 |

---



2018 **Supplementary Table 39** Number of laccase genes per phylogenetic group for  
2019 **Arabidopsis, poplar and oak.**

2020

|                | <i>A. thaliana</i> | <i>Q. robur</i> | <i>P. trichocarpa</i> |
|----------------|--------------------|-----------------|-----------------------|
| <b>Group 1</b> | 1                  | 1               | 5                     |
| <b>Group 2</b> | 6                  | 14              | 24                    |
| <b>Group 3</b> | 1                  | 1               | 1                     |
| <b>Group 4</b> | 3                  | 1               | 5                     |
| <b>Group 5</b> | 4                  | 1               | 6                     |
| <b>Group 6</b> | 1                  | 7               | 6                     |
| <b>Group 7</b> | 1                  | 2               | 4                     |
| <b>Total</b>   | 17                 | 27              | 51                    |

2021

2022

2023 **Supplementary Table 40 Available or soon to be released eudicot whole-genome**  
 2024 **sequences** (as reported in  
 2025 [https://genomeevolution.org/wiki/index.php/Sequenced\\_plant\\_genomes](https://genomeevolution.org/wiki/index.php/Sequenced_plant_genomes) as of 18 December  
 2026 2016), with growth habit from Zanne et al.<sup>152</sup> (H = herbaceous, W = woody), supplemented  
 2027 with Google searches, and % woody based on the strong prior from Fitzjohn et al.<sup>149</sup> at the  
 2028 genus, family and order levels. The names of the species were updated with taxize R-package,  
 2029 using Plant List version 1.1.

| Order          | Family        | Sequenced species            | Growth form | % woody |        |       |
|----------------|---------------|------------------------------|-------------|---------|--------|-------|
|                |               |                              |             | Genus   | Family | Order |
| Brassicales    | Brassicaceae  | <i>Arabidopsis halleri</i>   | H           | 0       | 5      | 15    |
| Brassicales    | Brassicaceae  | <i>Arabidopsis lyrata</i>    | H           | 0       | 5      | 15    |
| Brassicales    | Brassicaceae  | <i>Arabidopsis thaliana</i>  | H           | 0       | 5      | 15    |
| Fabales        | Fabaceae      | <i>Arachis hypogaea</i>      | H           | 0       | 63     | 62    |
| Caryophyllales | Amaranthaceae | <i>Beta vulgaris</i>         | H           | 0       | 38     | 42    |
| Brassicales    | Brassicaceae  | <i>Brassica napus</i>        | H           | 0       | 5      | 15    |
| Brassicales    | Brassicaceae  | <i>Brassica oleracea</i>     | H           | 0       | 5      | 15    |
| Brassicales    | Brassicaceae  | <i>Brassica rapa</i>         | H           | 0       | 5      | 15    |
| Brassicales    | Brassicaceae  | <i>Camelina sativa</i>       | H           | 0       | 5      | 15    |
| Rosales        | Cannabaceae   | <i>Cannabis sativa</i>       | H           | 0       | 96     | 75    |
| Solanales      | Solanaceae    | <i>Capsicum annuum</i>       | H           | 0       | 62     | 50    |
| Fabales        | Fabaceae      | <i>Cicer arietinum</i>       | H           | 0       | 63     | 62    |
| Cucurbitales   | Cucurbitaceae | <i>Citrullus lanatus</i>     | H           | 0       | 13     | 11    |
| Cucurbitales   | Cucurbitaceae | <i>Cucumis melo</i>          | H           | 0       | 13     | 11    |
| Cucurbitales   | Cucurbitaceae | <i>Cucumis sativus</i>       | H           | 0       | 13     | 11    |
| Asterales      | Asteraceae    | <i>Erigeron canadensis</i>   | H           | 8       | 25     | 26    |
| Rosales        | Rosaceae      | <i>Fragaria vesca</i>        | H           | 0       | 76     | 75    |
| Fabales        | Fabaceae      | <i>Glycine max</i>           | H           | 13      | 63     | 62    |
| Rosales        | Cannabaceae   | <i>Humulus lupulus</i>       | H           | 0       | 96     | 75    |
| Fabales        | Fabaceae      | <i>Lotus corniculatus</i>    | H           | 25      | 63     | 62    |
| Fabales        | Fabaceae      | <i>Lupinus angustifolius</i> | H           | 22      | 63     | 62    |
| Fabales        | Fabaceae      | <i>Medicago truncatula</i>   | H           | 8       | 63     | 62    |
| Lamiales       | Phrymaceae    | <i>Mimulus guttatus</i>      | H           | 27      | 24     | 45    |
| Proteales      | Nelumbonaceae | <i>Nelumbo nucifera</i>      | H           | 0       | 0      | 100   |
| Solanales      | Solanaceae    | <i>Nicotiana benthamiana</i> | H           | 33      | 62     | 50    |
| Fabales        | Fabaceae      | <i>Phaseolus vulgaris</i>    | H           | 0       | 63     | 62    |
| Brassicales    | Brassicaceae  | <i>Raphanus raphanistrum</i> | H           | 0       | 5      | 15    |
| Brassicales    | Brassicaceae  | <i>Sisymbrium irio</i>       | H           | 0       | 5      | 15    |

|              |                  |                                 |   |     |     |     |
|--------------|------------------|---------------------------------|---|-----|-----|-----|
| Solanales    | Solanaceae       | <i>Solanum lycopersicum</i>     | H | 65  | 62  | 50  |
| Solanales    | Solanaceae       | <i>Solanum melongena</i>        | H | 65  | 62  | 50  |
| Solanales    | Solanaceae       | <i>Solanum tuberosum</i>        | H | 65  | 62  | 50  |
| Lamiales     | Lentibulariaceae | <i>Utricularia gibba</i>        | H | 0   | 3   | 45  |
| Brassicales  | Brassicaceae     | <i>Aethionema arabicum</i>      | H | 0   | 5   | 15  |
| Ranunculales | Ranunculaceae    | <i>Aquilegia formosa</i>        | H | 0   | 16  | 31  |
| Brassicales  | Brassicaceae     | <i>Capsella rubella</i>         | H | 0   | 5   | 15  |
| Sapindales   | Rutaceae         | <i>Citrus clementina</i>        | W | 100 | 100 | 100 |
| Brassicales  | Cleomaceae       | <i>Cleome houtteana</i>         | H | 15  | 15  | 15  |
| Brassicales  | Brassicaceae     | <i>Eutrema parvulum</i>         | H | 0   | 5   | 15  |
| Brassicales  | Brassicaceae     | <i>Eutrema salsugineum</i>      | H | 0   | 5   | 15  |
| Lamiales     | Lentibulariaceae | <i>Genlisea aurea</i>           | H | 47  | 3   | 45  |
| Brassicales  | Brassicaceae     | <i>Leavenworthia alabamica</i>  | H | 0   | 5   | 15  |
| Malpighiales | Linaceae         | <i>Linum usitatissimum</i>      | H | 33  | 54  | 79  |
| Solanales    | Solanaceae       | <i>Lycopersicon pennellii</i>   | H | 0   | 62  | 50  |
| Rosales      | Rosaceae         | <i>Prunus mume</i>              | W | 100 | 76  | 75  |
| Rosales      | Rosaceae         | <i>Pyrus bretschneideri</i>     | W | 100 | 76  | 75  |
| Solanales    | Solanaceae       | <i>Solanum arcanum</i>          | H | 65  | 62  | 50  |
| Solanales    | Solanaceae       | <i>Solanum habrochaites</i>     | H | 65  | 62  | 50  |
| Solanales    | Solanaceae       | <i>Solanum pimpinellifolium</i> | H | 65  | 62  | 50  |
| Fabales      | Fabaceae         | <i>Vigna radiata</i>            | H | 0   | 63  | 62  |
| Ericales     | Actinidiaceae    | <i>Actinidia chinensis</i>      | W | 100 | 100 | 84  |
| Malvales     | Thymelaeaceae    | <i>Aquilaria agallocha</i>      | W | 100 | 94  | 86  |
| Sapindales   | Meliaceae        | <i>Azadirachta indica</i>       | W | 100 | 100 | 100 |
| Fagales      | Betulaceae       | <i>Betula nana</i>              | W | 100 | 100 | 100 |
| Fabales      | Fabaceae         | <i>Cajanus cajan</i>            | W | 100 | 63  | 62  |
| Brassicales  | Caricaceae       | <i>Carica papaya</i>            | W | 100 | 93  | 15  |
| Sapindales   | Rutaceae         | <i>Citrus sinensis</i>          | W | 100 | 100 | 100 |
| Gentianales  | Rubiaceae        | <i>Coffea canephora</i>         | W | 100 | 82  | 76  |
| Myrtales     | Myrtaceae        | <i>Eucalyptus grandis</i>       | W | 100 | 100 | 92  |
| Lamiales     | Oleaceae         | <i>Fraxinus excelsior</i>       | W | 100 | 99  | 45  |
| Malvales     | Malvaceae        | <i>Gossypium raimondii</i>      | W | 93  | 83  | 86  |
| Malpighiales | Euphorbiaceae    | <i>Hevea brasiliensis</i>       | W | 100 | 72  | 79  |
| Rosales      | Rosaceae         | <i>Malus domestica</i>          | W | 100 | 76  | 75  |
| Malpighiales | Euphorbiaceae    | <i>Manihot esculenta</i>        | W | 100 | 72  | 79  |

|              |               |                              |   |     |     |     |
|--------------|---------------|------------------------------|---|-----|-----|-----|
| Malpighiales | Salicaceae    | <i>Populus trichocarpa</i>   | W | 100 | 100 | 79  |
| Rosales      | Rosaceae      | <i>Prunus persica</i>        | W | 100 | 76  | 75  |
| Fagales      | Fagaceae      | <i>Quercus robur</i>         | W | 100 | 100 | 100 |
| Malpighiales | Euphorbiaceae | <i>Ricinus communis</i>      | W | 100 | 72  | 79  |
| Malpighiales | Salicaceae    | <i>Salix purpurea</i>        | W | 100 | 100 | 79  |
| Malvales     | Malvaceae     | <i>Theobroma cacao</i>       | W | 100 | 83  | 86  |
| Ericales     | Ericaceae     | <i>Vaccinium corymbosum</i>  | W | 100 | 98  | 84  |
| Ericales     | Ericaceae     | <i>Vaccinium macrocarpon</i> | W | 100 | 98  | 84  |
| Vitales      | Vitaceae      | <i>Vitis vinifera</i>        | W | 100 | 98  | 98  |
| Rosales      | Rhamnaceae    | <i>Ziziphus jujuba</i>       | W | 100 | 99  | 75  |

---

2030

2031

2032 **Supplementary Table 41 Summary of the data used for GO term enrichment analysis**  
 2033 **for three gene categories: TDG (tamdemly duplicated genes), LDG (long distance-**  
 2034 **duplicated genes) and SG (singleton genes).** Abbreviations are as follows: MF (Molecular  
 2035 Function), BP (Biological Process), CC (Cellular Component).

2036

|                                                    | <b>Total</b> | <b>MF</b> | <b>BP</b> | <b>CC</b> |
|----------------------------------------------------|--------------|-----------|-----------|-----------|
| <b>No. of genes with GO terms in the reference</b> | 16,820       | 15,413    | 10,073    | 3,604     |
| <b>Total No. of GO terms</b>                       | 3,433        | 1,179     | 1,867     | 387       |
| <b>No. of TDGs with GO terms</b>                   | 6,686        | 6,280     | 4,103     | 1,086     |
| <b>No. of LDGs with GO terms</b>                   | 6,230        | 5,680     | 3,844     | 1,536     |
| <b>No. of SGs with GO terms</b>                    | 3,904        | 3,453     | 2,126     | 982       |
| <b>Significant GO terms: TDGs</b>                  | 97           | 55        | 32        | 10        |
| <b>Significant GO terms: LDGs</b>                  | 144          | 65        | 62        | 17        |
| <b>Significant GO terms: SGs</b>                   | 240          | 80        | 130       | 30        |

2037

2038

2039 **Supplementary Table 42 Summary of the data used for GO term enrichment analysis in**  
2040 **the orthogroups expanded in pedunculate oak.**

2041

|                                                                  | <b>Total</b> | <b>MF</b> | <b>BP</b> | <b>CC</b> |
|------------------------------------------------------------------|--------------|-----------|-----------|-----------|
| <b>No. of genes with GO terms in the reference</b>               | 16,820       | 15,413    | 10,073    | 3,604     |
| <b>No. of genes with GO terms in orthogroups expanded in oak</b> | 4,217        | 4,032     | 2,267     | 445       |
| <b>Total No. of GO terms in orthogroups expanded in oak</b>      | 3,433        | 1,179     | 1,867     | 387       |
| <b>Significant GO terms in orthogroups expanded in oak</b>       | 58           | 33        | 17        | 8         |

2042

2043

2044 **Supplementary Table 43 Summary of gene ontology (GO) enrichment analysis in woody**  
 2045 **perennials (A) and herbaceous species (B).** Abbreviations are as follows: Molecular  
 2046 function (MF), biological process (BP) and cellular component (CC).

2047

| <b>A. Woody perennials</b>                                   |              |           |           |           |
|--------------------------------------------------------------|--------------|-----------|-----------|-----------|
|                                                              | <b>Total</b> | <b>MF</b> | <b>BP</b> | <b>CC</b> |
| <b>No. of orthogroups with GO terms in the reference</b>     | 36,844       | 16,703    | 11,495    | 5,073     |
| <b>Total number of GO terms in the reference</b>             | 3,936        | 1,341     | 2,131     | 464       |
| <b>No. of significant expanded orthogroups with GO terms</b> | 108          | 104       | 84        | 39        |
| <b>No. of significant GO terms in expanded orthogroups</b>   | 61           | 38        | 19        | 4         |
| <b>B. Herbaceous species</b>                                 |              |           |           |           |
|                                                              | <b>Total</b> | <b>MF</b> | <b>BP</b> | <b>CC</b> |
| <b>No. of orthogroups with GO terms in the reference</b>     | 36,844       | 16,703    | 11,495    | 5,073     |
| <b>Total No. of GO terms in the reference</b>                | 3,936        | 1,341     | 2,131     | 464       |
| <b>No. of significant expanded orthogroups with GO terms</b> | 23           | 16        | 12        | 4         |
| <b>No. of significant GO terms in expanded orthogroups</b>   | 7            | 5         | 2         | 0         |

2048

2049

2050

2051 **11.Supplementary Figures**

2052

2053

2054 **Supplementary Fig. 1** Genome coverage distribution of the V1 (diploid, black) and V2  
2055 (diploid, red) assemblies, showing fewer regions with twice the expected coverage in the V2  
2056 assembly, i.e. better resolved haplotypes in the V2 assembly.

2057

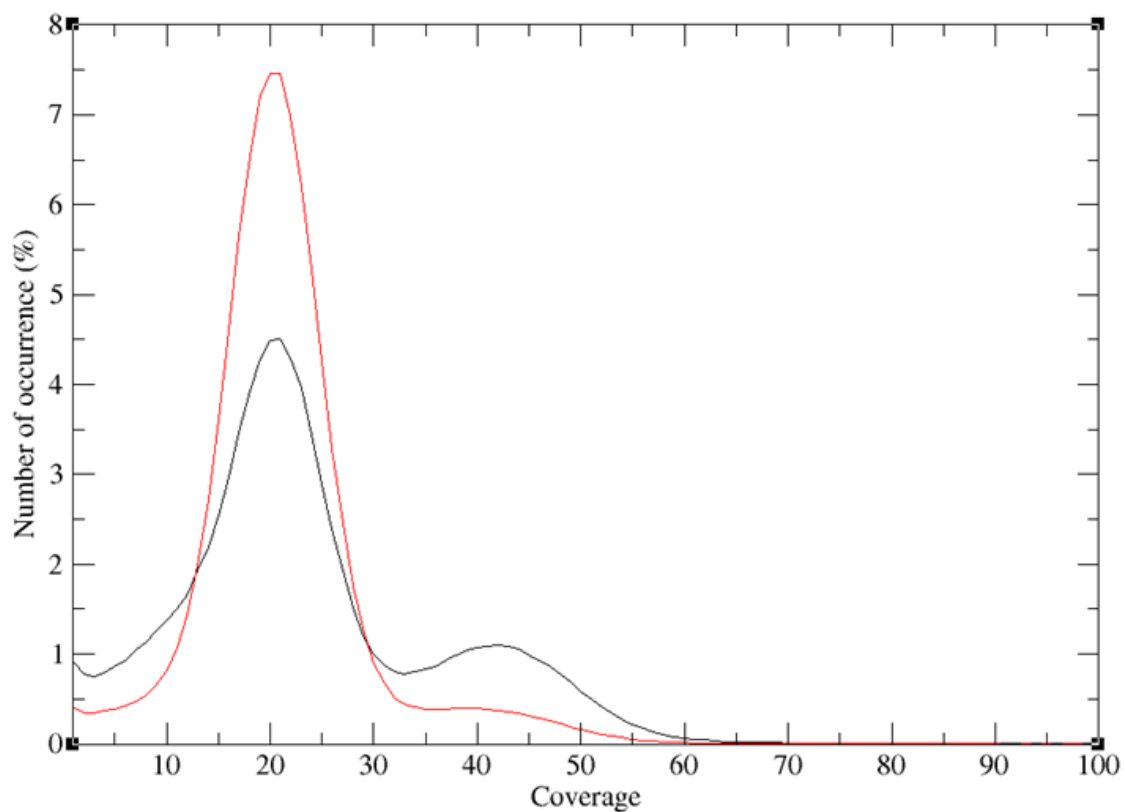

2058

2059



2060 **Supplementary Fig. 2** Illustration of the syntenome approach between *Prunus persica* and  
 2061 *Quercus robur*. Pedunculate oak scaffolds are anchored by oak markers (green scaffolds  
 2062 matching red dots of the oak genetic linkage map) or by peach gene models (purple scaffolds)  
 2063 or by both (combined green-purple scaffolds).

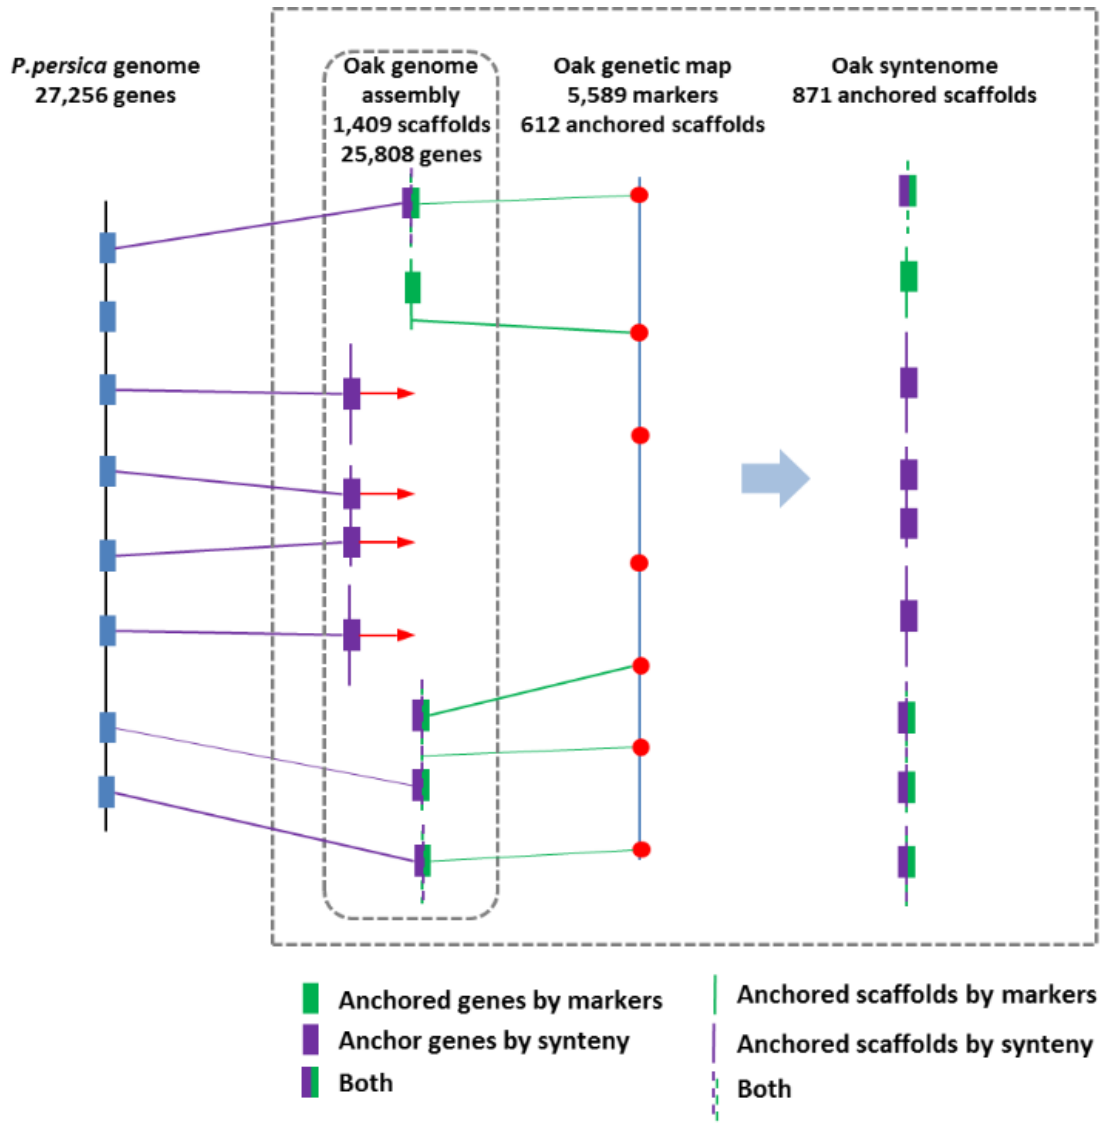

2064  
 2065

2066 **Supplementary Fig. 3** Distribution of TE families. Distribution of TE families according to:  
 2067 (a) their main order or superfamily (Gypsy/Copia) in the consensus library (1,750 consensus)  
 2068 and (b) their genome coverage (716,192 copies, 52% of the genome).

2069

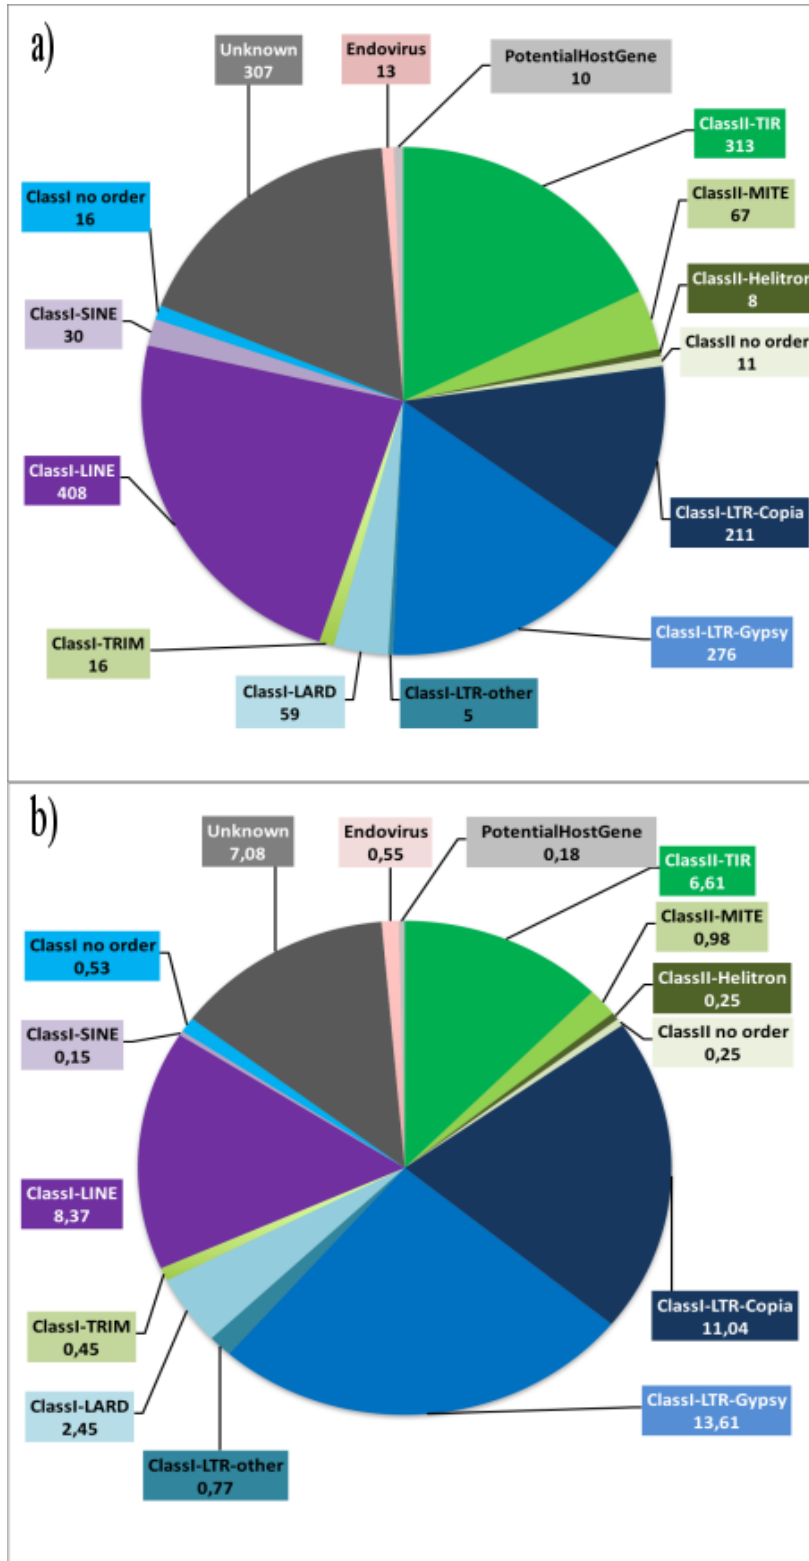

2070

2071

2072 **Supplementary Fig. 4** Chromosomal variations of genetic diversity. **(A)** Proportion of  
 2073 heterozygous sites within the “3P” reference genome sequence. **(B)** estimation of Tajima’s  $\pi$   
 2074 at the population level. Both metrics were calculated in 1 Mb windows, sliding by steps of  
 2075 250 kb. Colors correspond to Tukey's Honestly Significant Difference criterion at the  $\alpha =$   
 2076 0.05 significance level. Box plots were drawn with R with default parameters. The bottom  
 2077 and top of the box are the 25<sup>th</sup> and 75<sup>th</sup> percentile (the lower and upper quartiles,  
 2078 respectively), thus delineating the interquartile range (IQR). The band near the middle of the  
 2079 box is the 50<sup>th</sup> percentile (i.e. the median). For the ends of the whiskers we used the default  
 2080 box plot parameter for statistical dispersion in R (1.5\*IQR). Below the figures the sample size  
 2081 (number of windows) and quantile values are provided for each chromosome and each metric.

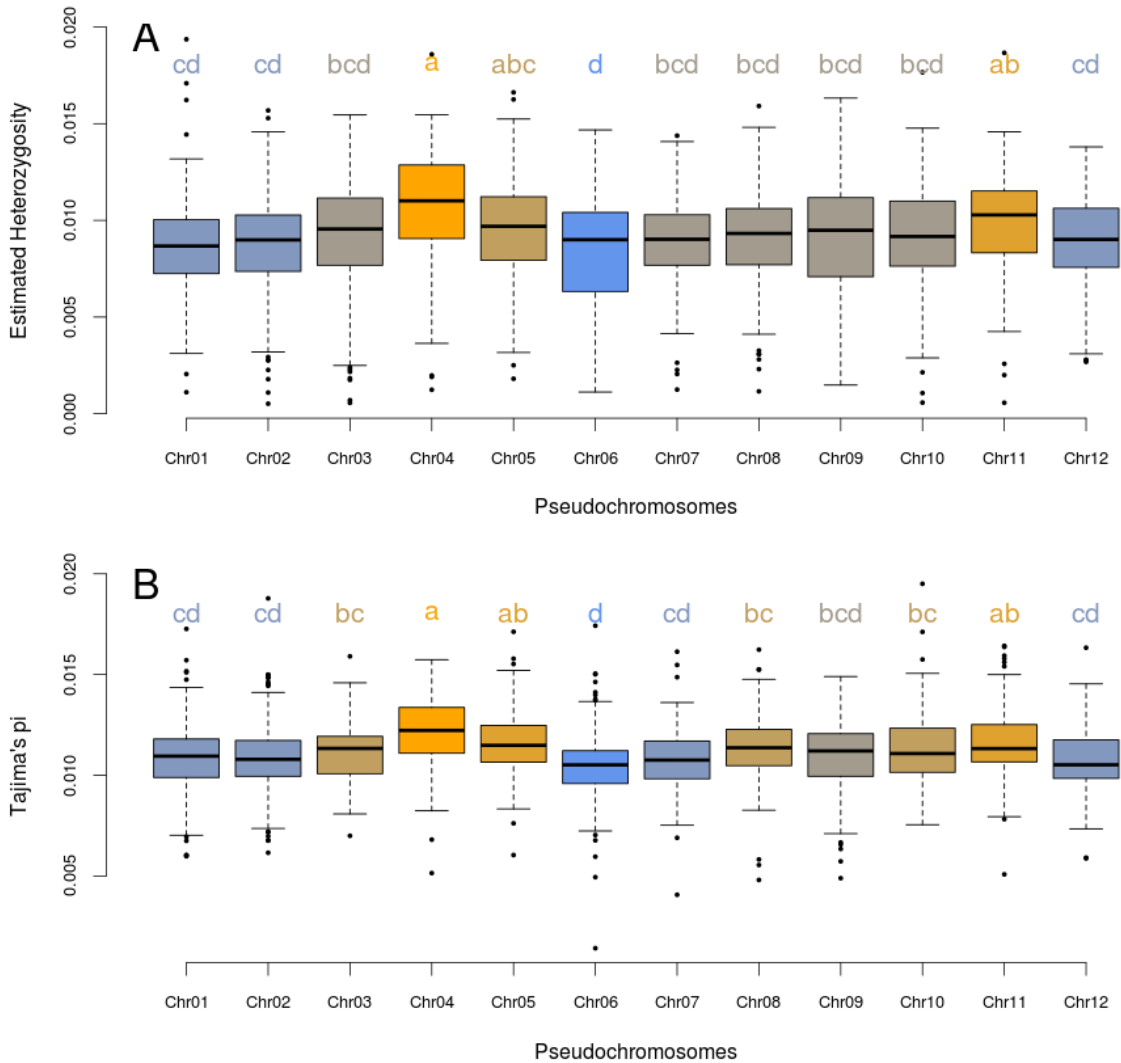

2082  
 2083  
 2084  
 2085  
 2086  
 2087  
 2088

2089 Sample sizes and qualile values.

| <b>A</b> chrom | #windows   | 1stcentile  | 5thcentile  | 10thcentile | 1stquartile | median      | 3rdquartile | 90thcentile | 95thcentile | 99thcentile |
|----------------|------------|-------------|-------------|-------------|-------------|-------------|-------------|-------------|-------------|-------------|
| 1 Chr01        | <b>130</b> | 0.002363013 | 0.004393948 | 0.005261262 | 0.007251443 | 0.008672124 | 0.010039868 | 0.011519258 | 0.012145932 | 0.016840459 |
| 2 Chr02        | <b>266</b> | 0.002100697 | 0.004298015 | 0.005754484 | 0.007370706 | 0.008988398 | 0.010277284 | 0.011669246 | 0.012467453 | 0.014217985 |
| 3 Chr03        | <b>137</b> | 0.001081677 | 0.002477953 | 0.004194525 | 0.007676995 | 0.009552104 | 0.011155354 | 0.012308122 | 0.012993091 | 0.013777254 |
| 4 Chr04        | <b>99</b>  | 0.001895541 | 0.004651434 | 0.006457263 | 0.009059405 | 0.011011622 | 0.012866448 | 0.013945719 | 0.014408945 | 0.015519873 |
| 5 Chr05        | <b>160</b> | 0.002897904 | 0.004659509 | 0.005936392 | 0.00798619  | 0.009694981 | 0.011206569 | 0.012567117 | 0.013375598 | 0.015656735 |
| 6 Chr06        | <b>131</b> | 0.001494684 | 0.002640328 | 0.003820639 | 0.006321167 | 0.009001377 | 0.010412181 | 0.011392821 | 0.01235098  | 0.013901824 |
| 7 Chr07        | <b>107</b> | 0.002069173 | 0.004260246 | 0.005199583 | 0.007680156 | 0.009023406 | 0.0102929   | 0.011745387 | 0.012485407 | 0.014034843 |
| 8 Chr08        | <b>177</b> | 0.002690201 | 0.004800595 | 0.006018946 | 0.007705742 | 0.009324316 | 0.010612334 | 0.011557058 | 0.012273925 | 0.014481952 |
| 9 Chr09        | <b>115</b> | 0.001977248 | 0.00323089  | 0.004647822 | 0.007088226 | 0.009489949 | 0.011178917 | 0.012862547 | 0.014187532 | 0.015566817 |
| 10 Chr10       | <b>119</b> | 0.001263906 | 0.003383373 | 0.004767478 | 0.007632744 | 0.00916589  | 0.010998188 | 0.012691446 | 0.013874577 | 0.014762114 |
| 11 Chr11       | <b>108</b> | 0.002044077 | 0.004747339 | 0.006210409 | 0.008371558 | 0.010282012 | 0.011518549 | 0.012360799 | 0.013290434 | 0.014556657 |
| 12 Chr12       | <b>90</b>  | 0.002745973 | 0.003568476 | 0.005181146 | 0.007615457 | 0.009013432 | 0.01060477  | 0.011471683 | 0.011952998 | 0.012647347 |

| <b>B</b> chrom | #windows   | 1stcentile  | 5thcentile  | 10thcentile | 1stquartile | median      | 3rdquartile | 90thcentile | 95thcentile | 99thcentile |
|----------------|------------|-------------|-------------|-------------|-------------|-------------|-------------|-------------|-------------|-------------|
| 1 Chr01        | <b>145</b> | 0.006036747 | 0.007824487 | 0.008626952 | 0.0098874   | 0.010948342 | 0.011802318 | 0.012579441 | 0.013850033 | 0.015472398 |
| 2 Chr02        | <b>315</b> | 0.007005252 | 0.008245111 | 0.00893641  | 0.009946993 | 0.01079225  | 0.011729033 | 0.013046817 | 0.013603244 | 0.014903649 |
| 3 Chr03        | <b>144</b> | 0.008221722 | 0.008864512 | 0.00936807  | 0.010093188 | 0.011332564 | 0.011924467 | 0.013027595 | 0.013648772 | 0.014547199 |
| 4 Chr04        | <b>119</b> | 0.007066025 | 0.009430628 | 0.009896027 | 0.011095004 | 0.012225594 | 0.013367221 | 0.013967201 | 0.014483707 | 0.015332212 |
| 5 Chr05        | <b>180</b> | 0.008182576 | 0.008781872 | 0.009904223 | 0.010659378 | 0.011487088 | 0.01247425  | 0.013389647 | 0.013723549 | 0.015578464 |
| 6 Chr06        | <b>165</b> | 0.005597463 | 0.007781344 | 0.008438614 | 0.009589428 | 0.010516228 | 0.01122136  | 0.012670056 | 0.013657986 | 0.015023686 |
| 7 Chr07        | <b>126</b> | 0.007055785 | 0.008025906 | 0.009054159 | 0.00982444  | 0.010753628 | 0.011695085 | 0.012823905 | 0.013157198 | 0.015324665 |
| 8 Chr08        | <b>180</b> | 0.00576823  | 0.008757703 | 0.009330757 | 0.010481886 | 0.011365739 | 0.01227747  | 0.013089583 | 0.013717592 | 0.015245776 |
| 9 Chr09        | <b>139</b> | 0.005964687 | 0.007555009 | 0.008606873 | 0.009947773 | 0.011206606 | 0.012067391 | 0.012986125 | 0.0136571   | 0.014526484 |
| 10 Chr10       | <b>119</b> | 0.008395567 | 0.009141206 | 0.009512838 | 0.010143959 | 0.011079144 | 0.012335854 | 0.013440607 | 0.014436443 | 0.016871645 |
| 11 Chr11       | <b>135</b> | 0.007864851 | 0.008833194 | 0.009467378 | 0.010663593 | 0.011324205 | 0.012517949 | 0.013841686 | 0.014949459 | 0.016224063 |
| 12 Chr12       | <b>101</b> | 0.005913755 | 0.007754588 | 0.008757966 | 0.009844794 | 0.010519347 | 0.011761386 | 0.012460929 | 0.012820039 | 0.014536021 |

2090

2091

2092

2093

2094 **Supplementary Fig. 5** Dating of branch insertion and bud sampling for DNA extraction. **(a)**  
2095 Coring of a lateral branch at its insertion into the main trunk. **(b)** Wood core used to estimate  
2096 the age of the lateral branch. **(c)** Bud sampling at the extremity of a lateral branch.

2097

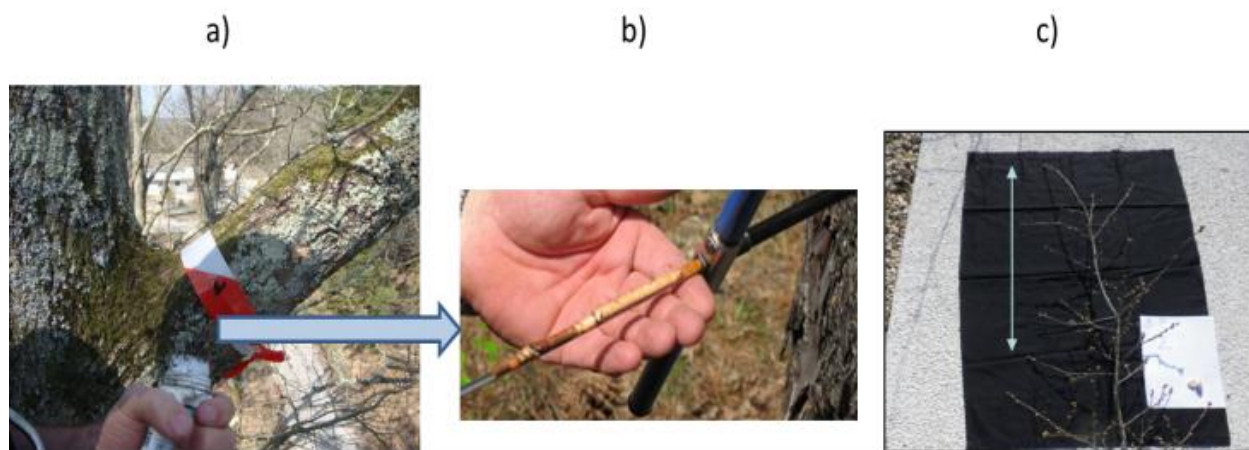

2098

2099 © Grégoire le Provost

2100

2101

2102 **Supplementary Fig. 6** Maximum likelihood phylogenetic analysis of TIR-NB-LRR-related  
 2103 genes. The NB domain of TNL-related genes (i.e., TNL, TNLX, NL, NLX, TN, TNX, TL, N)  
 2104 corresponding to orthogroup #1000 was used to study the relationship between selected tree  
 2105 (Cc, *Citrus clementina*; Cp, *Carica papaya*; Eg, *Eucalyptus grandis*; Md, *Malus domestica*;  
 2106 Pp, *Prunus persica*; Pt, *Populus trichocarpa*; Qr, *Quercus robur*; Tc, *Theobroma cacao*; Vv,  
 2107 *Vitis vinifera*) and herbaceous plant species (At, *Arabidopsis thaliana*; Al, *Arabidopsis lyrata*;  
 2108 Cl, *Citrullus lanatus*; Fv, *Fragaria vesca*; Gm, *Glycine max*; Rc, *Ricinus communis*; St,  
 2109 *Solanum tuberosum*), represented by brown and green branches, respectively. The oak TNL-  
 2110 related genes clades are shown as light brown squares. The red arrows in these blocks  
 2111 correspond to physical clusters along the genome, and chromosomes (Chr\_x) or scaffolds  
 2112 (Scaf\_x) are indicated (only the major clusters are indicated). The number of genes from  
 2113 different species falling into the major clades are shown (only the dominant species were  
 2114 counted for each clade). Bootstrap values over 70% and 80% (of 1000 replicates) are  
 2115 indicated by gray and black dots, respectively. Supported terminal nodes are not shown, to  
 2116 make the tree easier to read. The NB domain of APAF-1 was used as an outgroup to root the  
 2117 tree. Clades containing the NB domains of the TNL genes *Rpp4*, *Rpp5*, *Rps4* reported in  
 2118 *A. thaliana* are indicated.

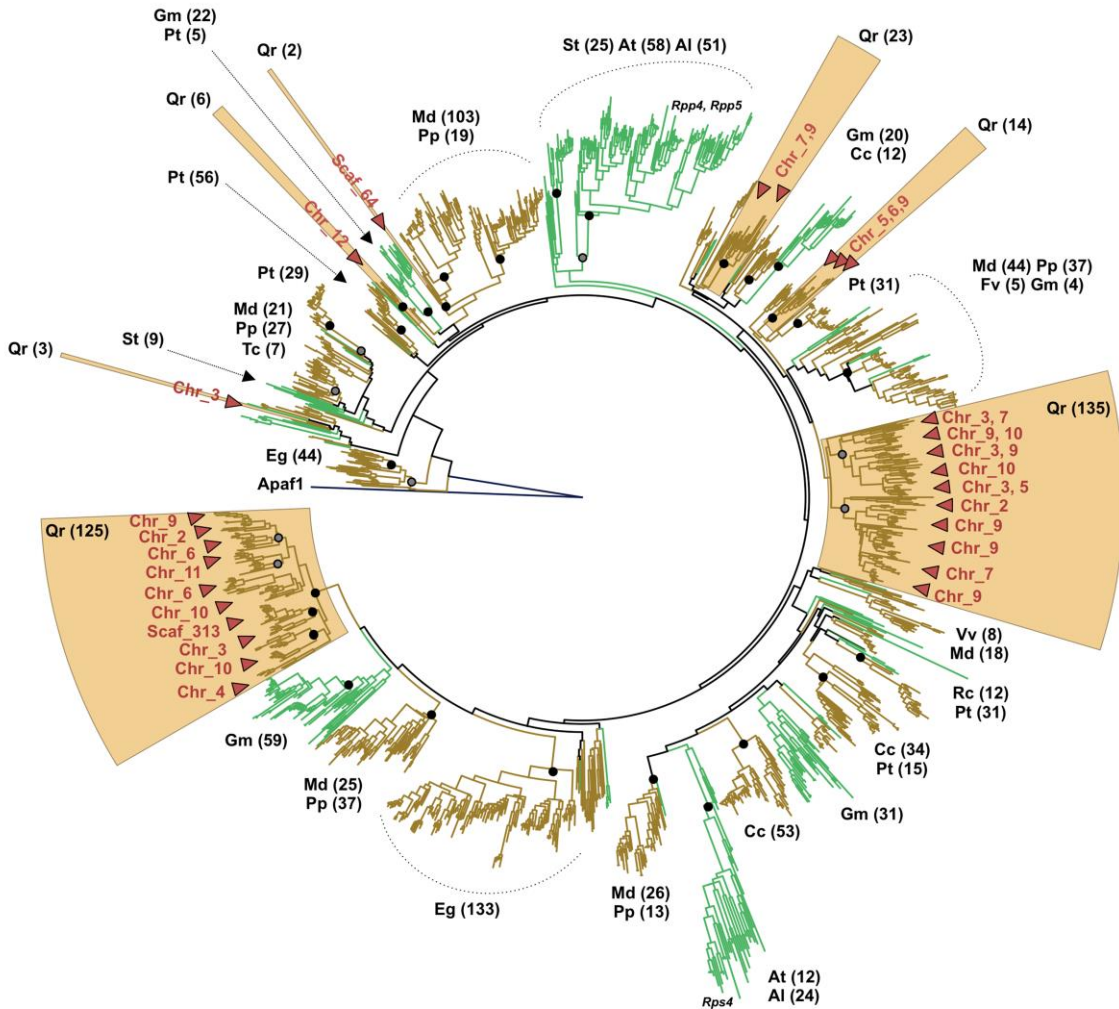

2119

2120

2121 **Supplementary Fig. 7** Fold-enrichment over background level (*x*-axis) of the significant  
 2122 gene ontology (GO) terms ( $P < 0.01$ ) of the orthogroups expanded in woody perennials. GO  
 2123 terms representing biological processes are shown as red lines, cellular components are shown  
 2124 in blue and molecular functions are shown in green. Sample sizes are provided in  
 2125 **Supplementary Data Set 8** sheet #5).

2126

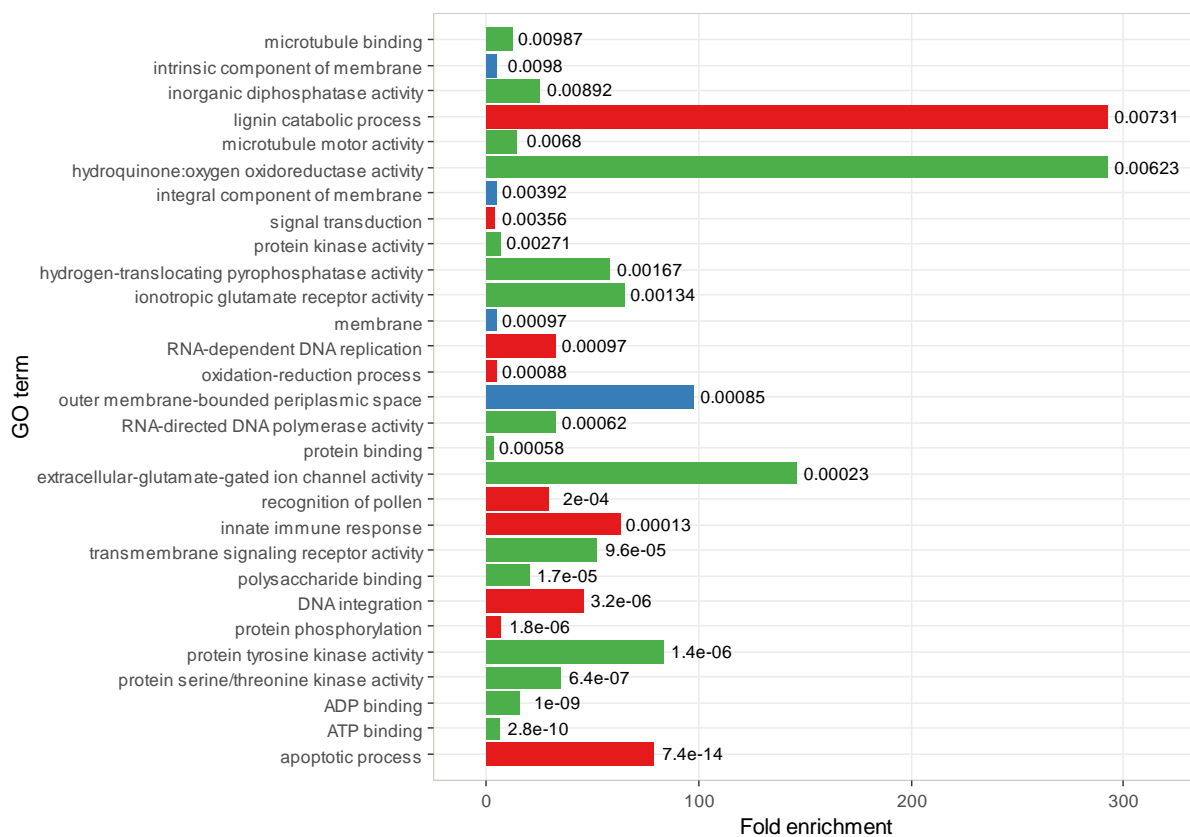

2127

2128

2129

2130 **Supplementary Fig. 8** Number of amino acids under positive selection for each of the 24  
2131 positions of the LRR domain unit. L: Leu, x: variable, N: Asn, G: Gly, I: Ile, P: Pro.

2132

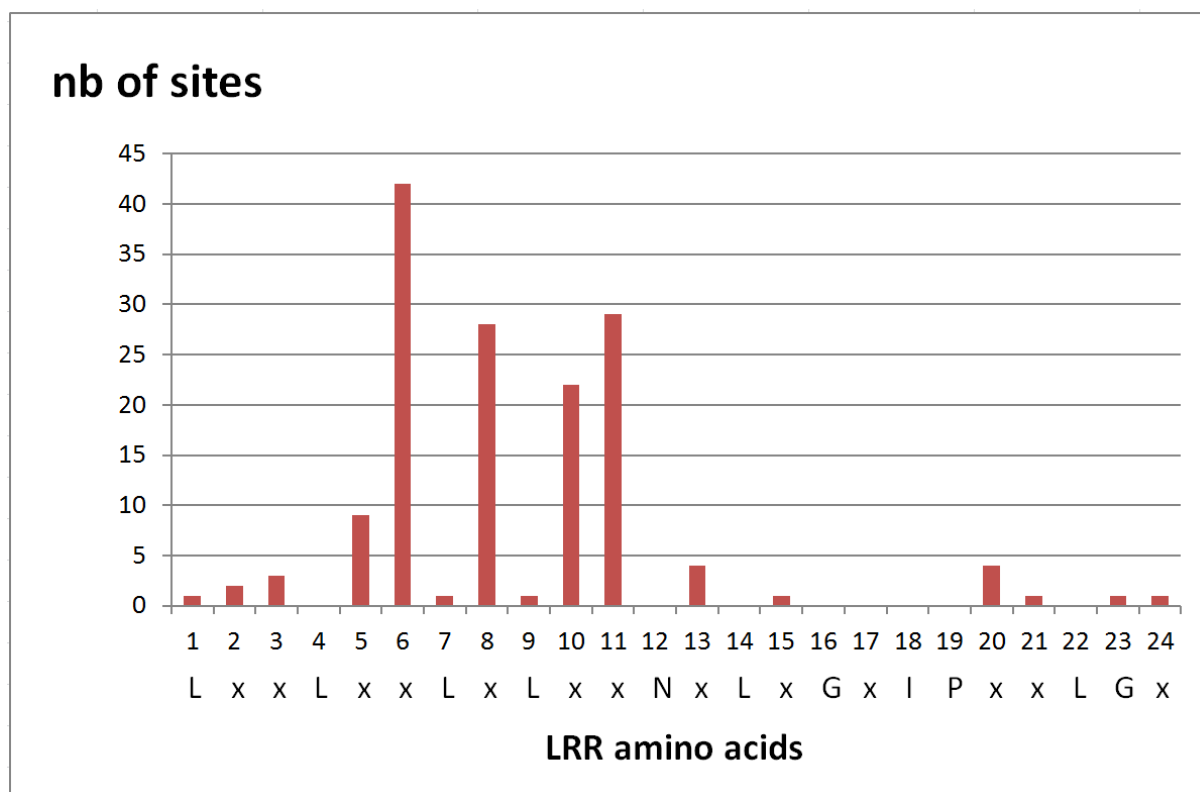

2133

2134

2135

2136



2137 **Supplementary Fig. 9** NUCmer alignment and dotplots of Cabog (A) and Newbler (B)  
2138 scaffolds against two pedunculate oak BACs (177A20 and 107I07).

2139

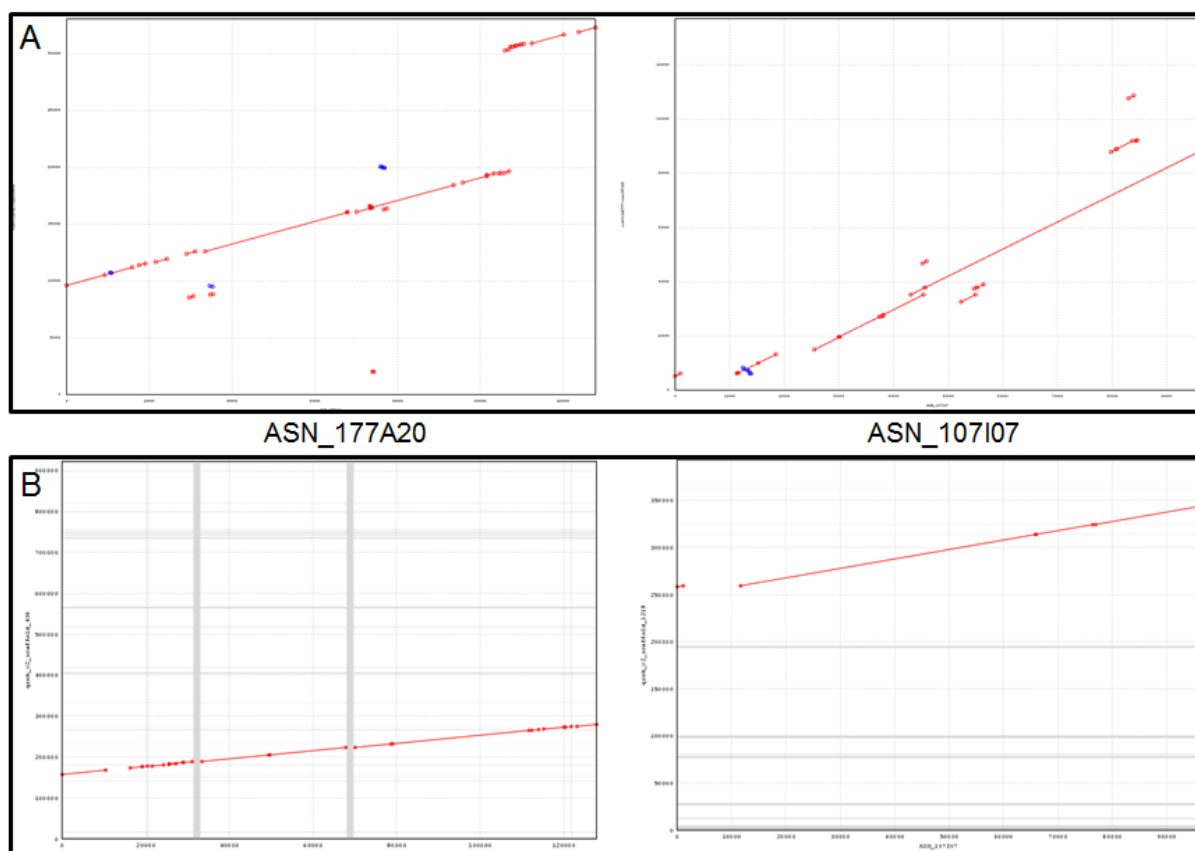

2140

2141

2142

2143 **Supplementary Fig. 10** Generation of the haploid assembly (1n) of pedunculate oak with  
2144 haplomeger. In general, both haplotypes are well separated in the 2n assembly (blue and  
2145 orange haplotypes). For each aligned block (pink polygons), we retained only the longest  
2146 sequence (haplotype blue or orange) as recommended by the creators of haplomeger, to  
2147 maximize gene content. Scaffolds merging the two haplotypes (as Scaffold F) in the 2n  
2148 assembly were retained, without modifications, in the 1n assembly.

2149

## 2n assembly

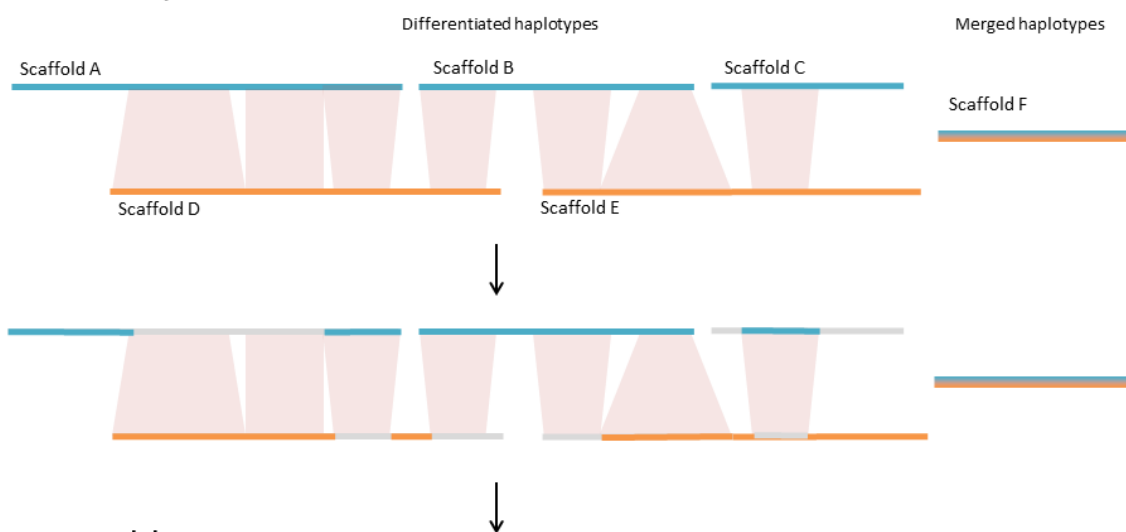

2150

2151 **Supplementary Fig. 11** Alignment of two allelic BACs (#50E24 and #177A20) against the  
 2152 V2 diploid assembly (scaffold #0721 and #0436) and the V2 haploid assembly (Sc00000330).  
 2153 Gray boxes represent NUCmer alignments, blue rectangles correspond to SNPs specific to  
 2154 BAC #177A20 and red rectangles to SNPs specific to BAC #50E24. Green boxes correspond  
 2155 to flanking transposable elements.

2156

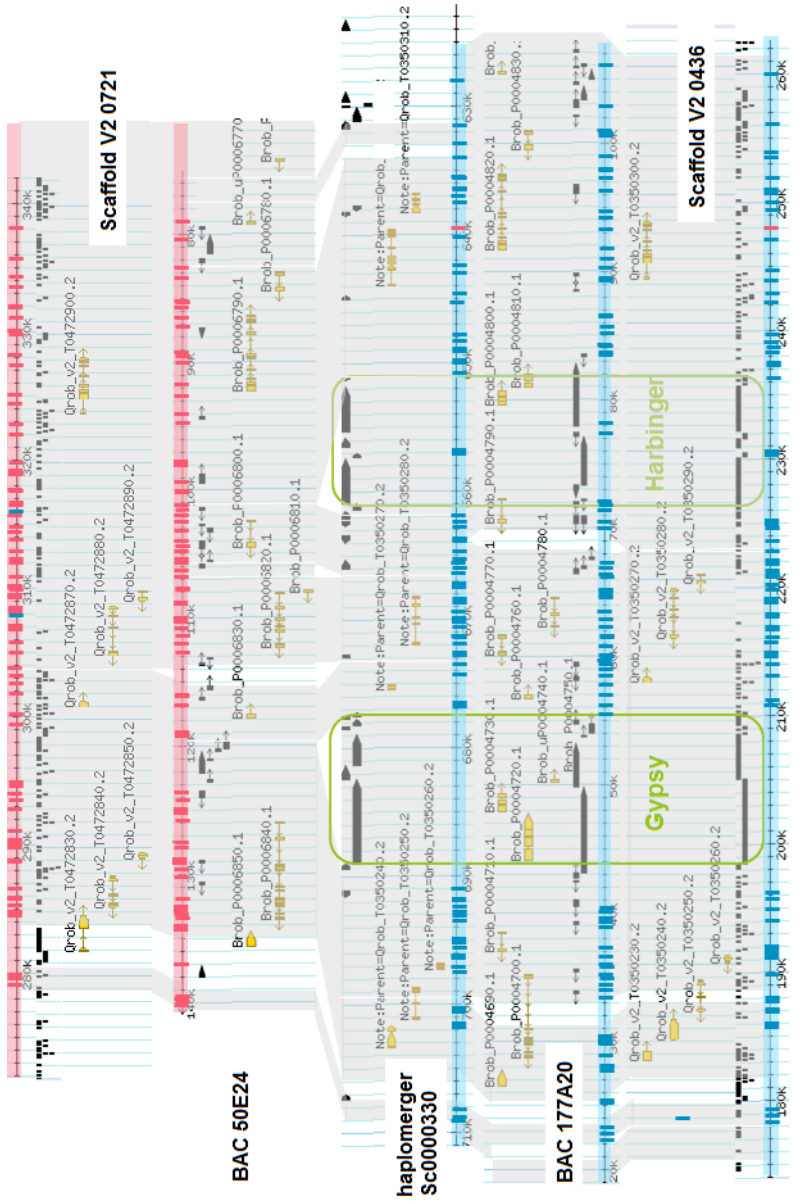

2157

2158

2159

2160 **Supplementary Fig. 12** Alignment of two allelic BACs (#12J1 and #121F17) against the V2  
 2161 diploid assembly (scaffold #0397 and #01822) and the V2 haploid assembly (Sc00000226).  
 2162 Gray boxes represent NUCmer alignments, blue rectangles correspond to SNPs specific to  
 2163 BAC #121F17 and red rectangles to SNPs specific to BAC #12J1. Green boxes correspond to  
 2164 flanking transposable elements.

2165

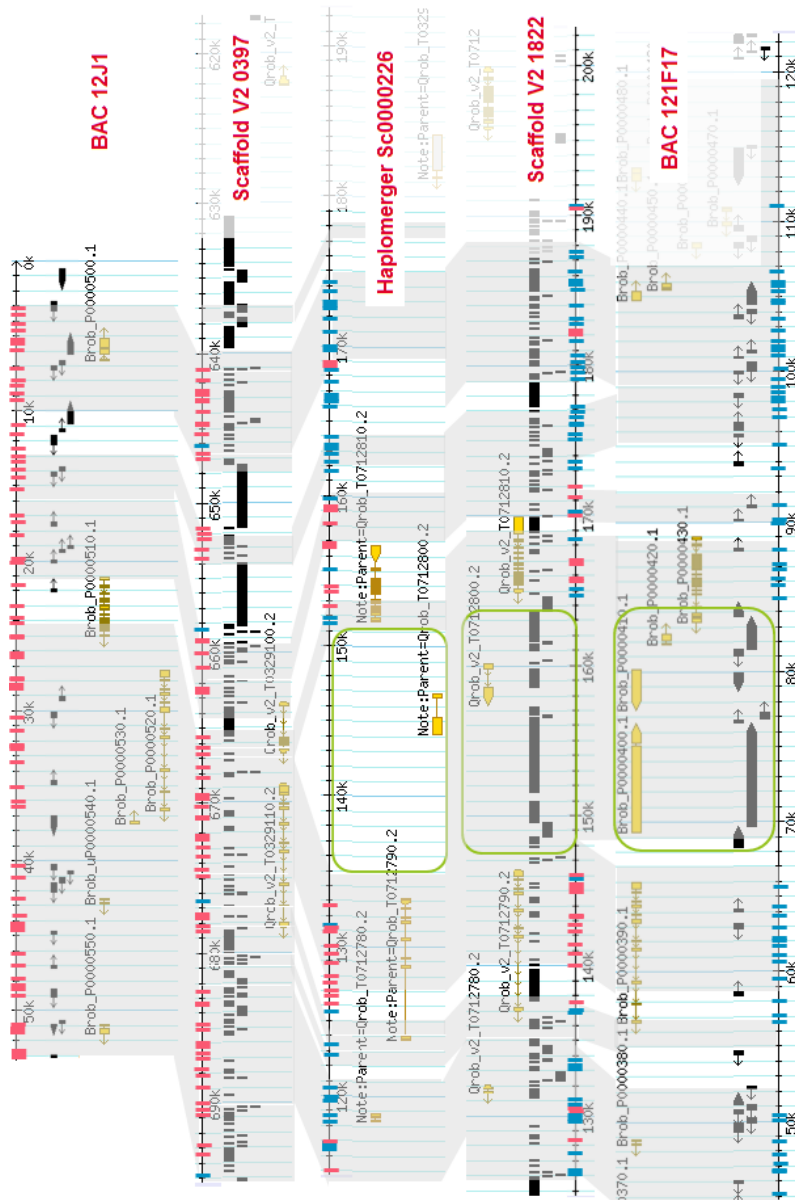

2166

2167

2168 **Supplementary Fig. 13** Alignment of the two allelic BACs (#107I07 and #5E10) against the  
 2169 V2 diploid assembly (scaffold #1218 and #0333) and the V2 haploid assembly (Sc00000189).  
 2170 Gray boxes represent NUCmer alignments, blue rectangles correspond to SNPs specific to  
 2171 BAC #107I07 and red rectangles to SNPs specific to BAC #5E10. Green boxes correspond to  
 2172 flanking transposable elements.

2173

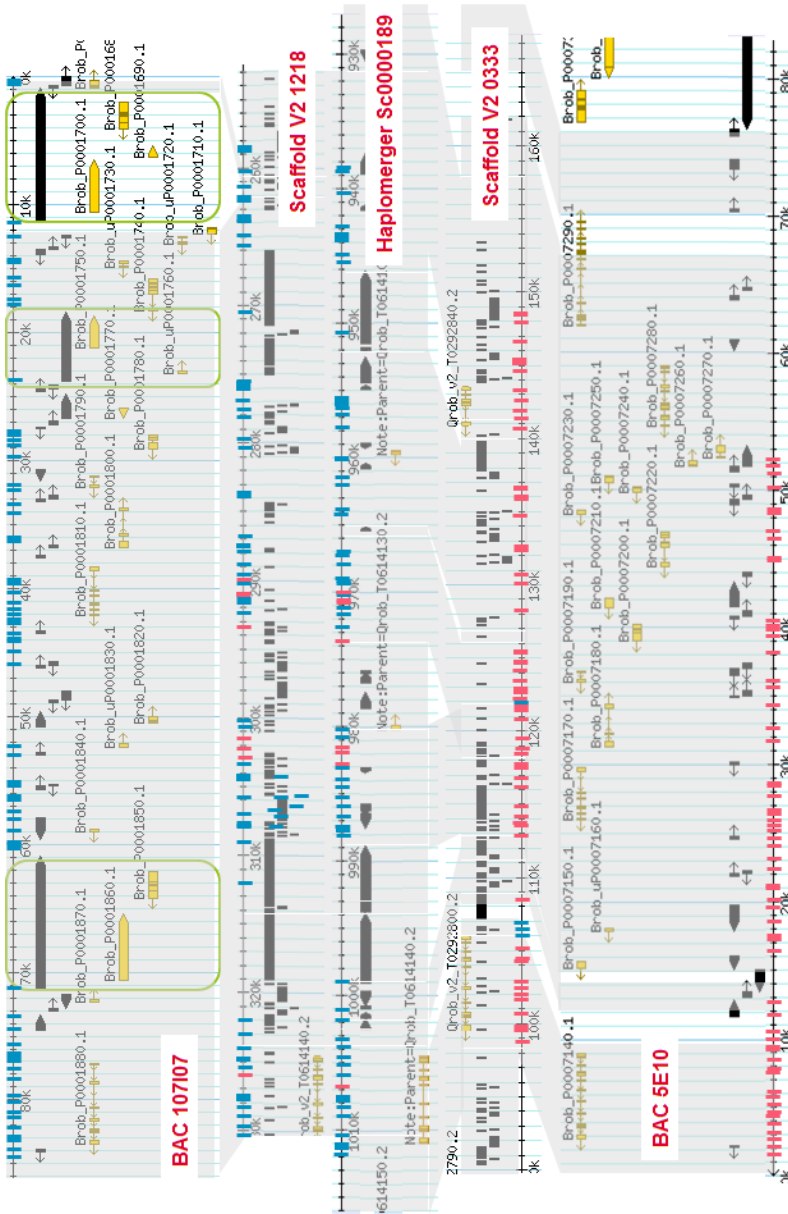

2174

2175



2185 **Supplementary Fig. 15** Genome-wide proportion of heterozygous sites (warm colors) and  
2186 Tajima's  $\pi$  (cold colors) estimates. The proportion of heterozygous sites was calculated after  
2187 calling heterozygous SNPs within the "3P" reference genome sequence by remapping all  
2188 Illumina reads of this genotype. Tajima's  $\pi$  was estimated by a whole-genome sequencing  
2189 strategy based on a pool of 20 pedunculate oaks. Both metrics were calculated in 1 Mb sliding  
2190 windows moving in 250 kb steps.

2191

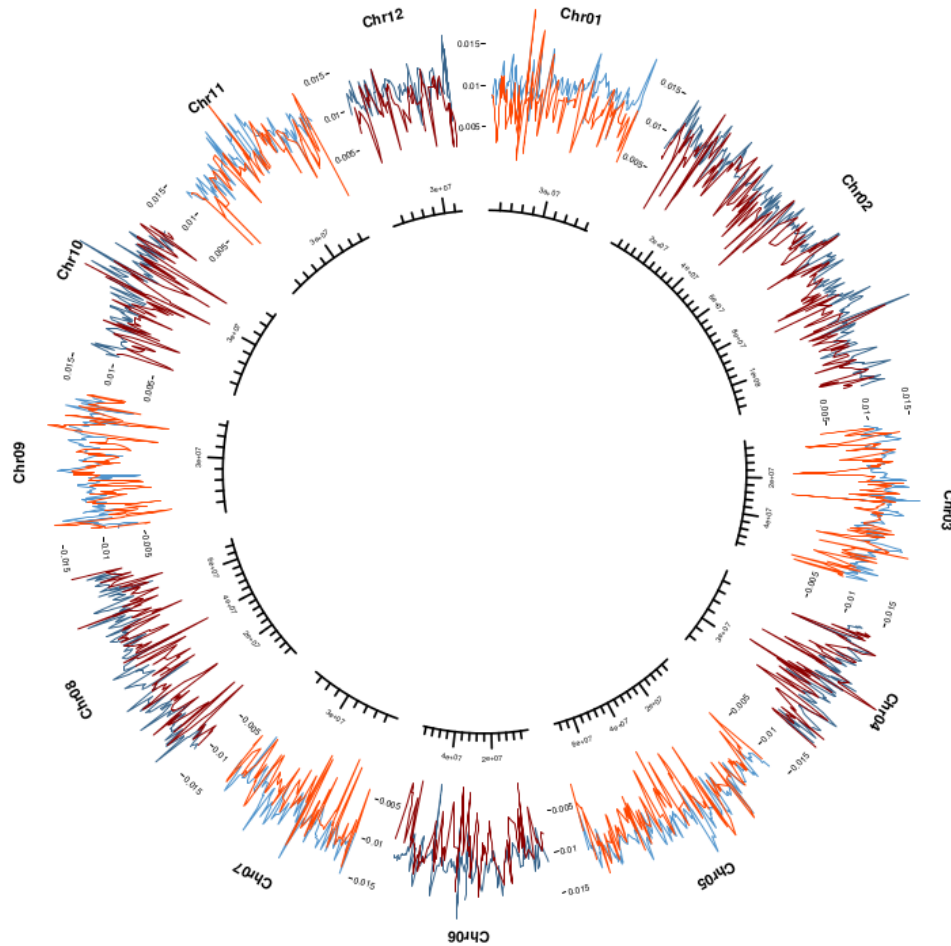

2192  
2193



2194 **Supplementary Fig. 16** Dotplot comparison of oak-grape-peach-cocoa genomes. Dot  
2195 illustration of grape-cocoa, grape-peach and grape-oak genome comparisons. Considering  
2196 grape to be the closest modern representative of the n=21 rosid ancestor (derived from a post-  
2197  $\gamma$  ancestor with 7 protochromosomes shown in color on the y-axis of the dotplots), clear  
2198 relationships are observed between the grape-cocoa (1:1), grape-peach (1:1) and grape-oak  
2199 (1:1) genomes (see dotplot diagonals in each chart, shown with green circles), supporting the  
2200 absence of lineage-specific polyploidization events in the considered species.

2201

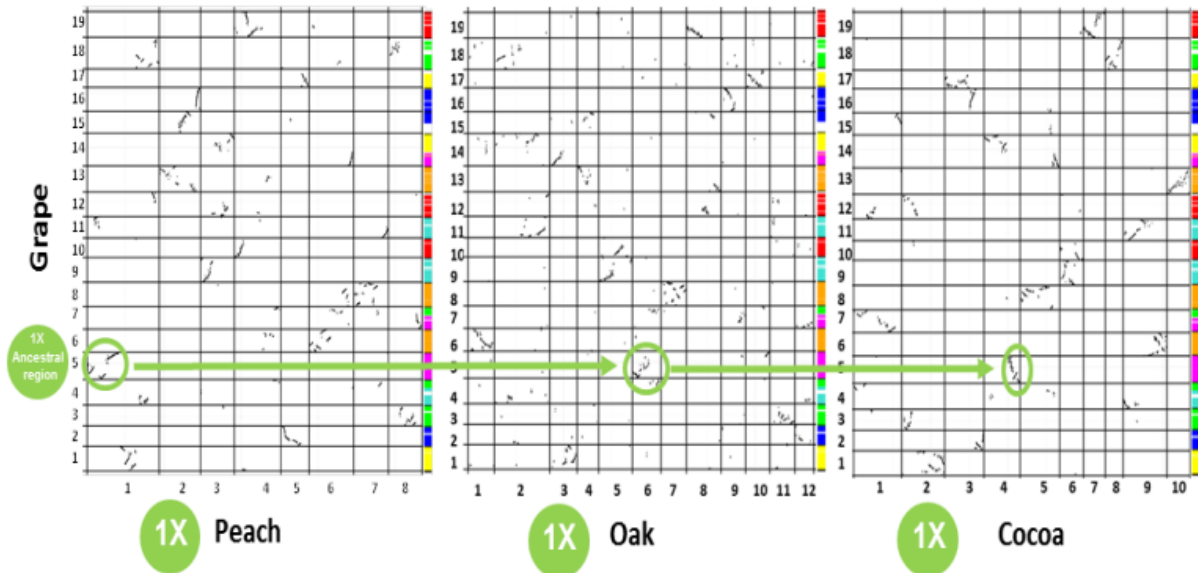

2202  
2203  
2204  
2205



2206 **Supplementary Fig. 17** List of 16 plant species used for gene expansion contraction analysis  
 2207 in pedunculate oak. (A) Phylogenetic tree format of the 16 species used in orthoMCL/CAFE  
 2208 software. (B) Phylogenetic tree representation of the 16 species. Red dots correspond to  
 2209 branch specific whole genome duplication events. Species initials refer to **Supplementary**  
 2210 **Table 7.**

2211

2212 **A**

2213 [(St:120,(Vv:117,(((Wa:101,((Md:53,(Pp:52,Fv:52):1):47,(Gm:99,Qr:99):1):1):1,(Rc:81,Pt:81  
 2214 ):21):8,(Eg:109,(Cc:95,(Tc:87,(Cp:72,(At:5,Al:5):67):15):8):14):1):7):3]

2215 **B**

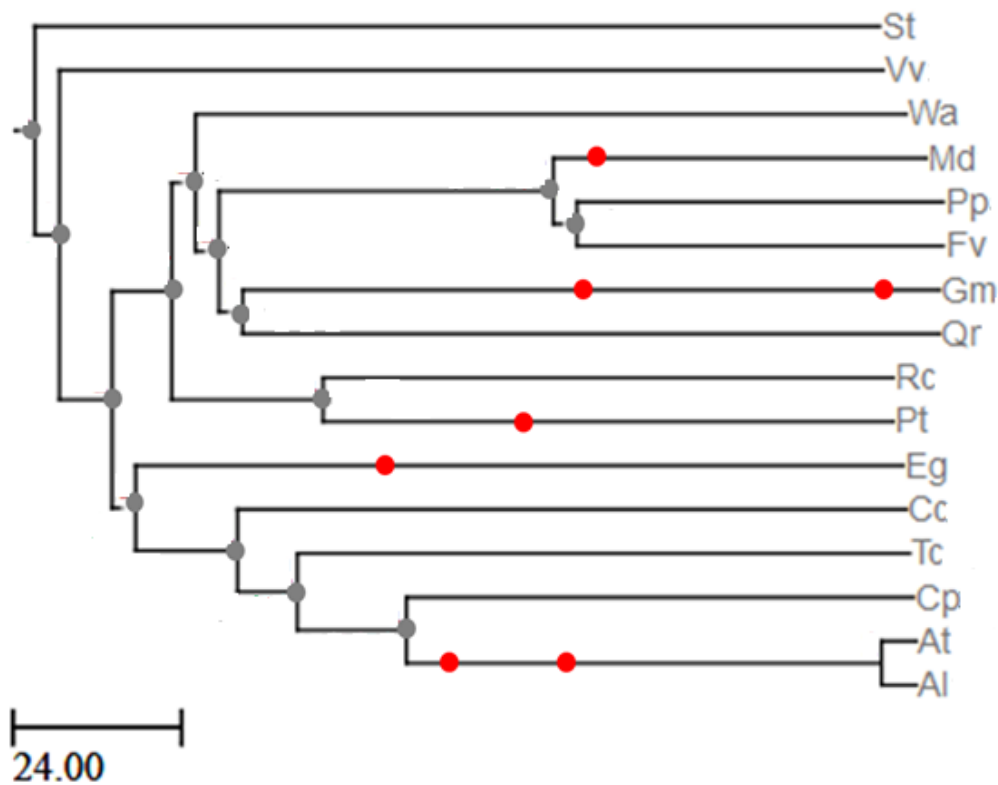

2216

2217

2218

2219 **Supplementary Fig. 18** Distribution of the 524 orthogroups expanded in pedunculate oak  
2220 across 15 plant species.

2221

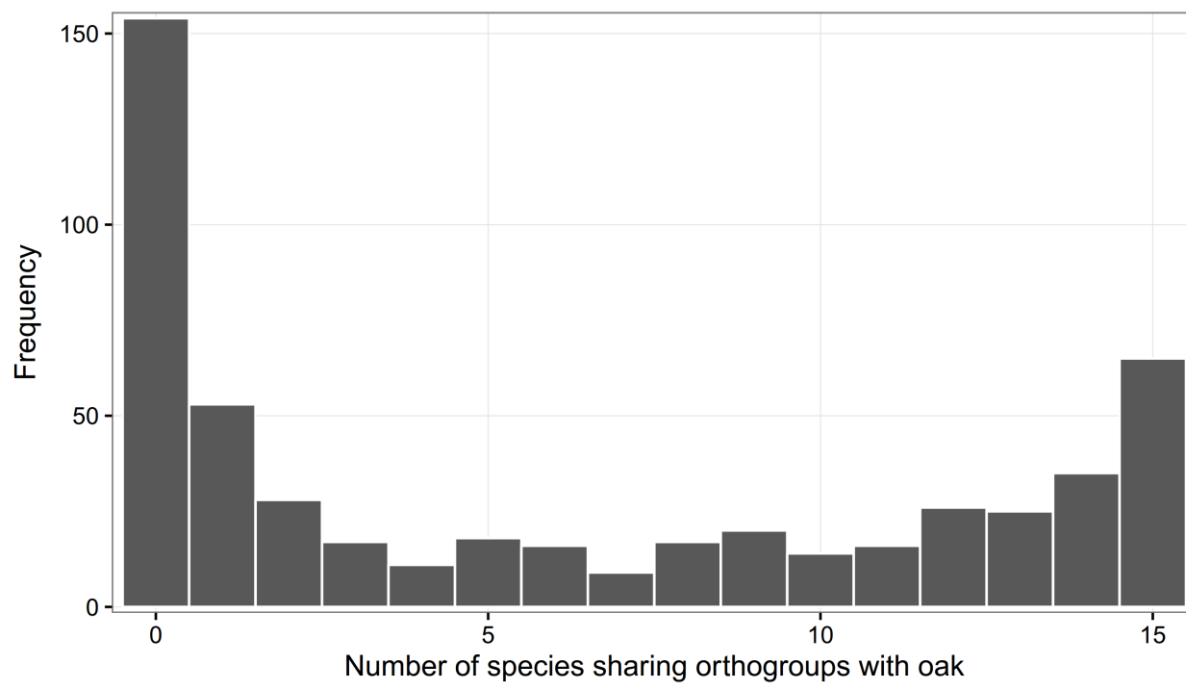

2222

2223

2224

2225 **Supplementary Fig. 19** Proportion of genes classified as singleton genes (SGs, blue), tandem  
2226 duplicated genes (TDGs, green) and long distance-duplicated genes (LDGs, red) in the 524  
2227 significant expanded orthogroups in pedunculate oak (PO).

2228

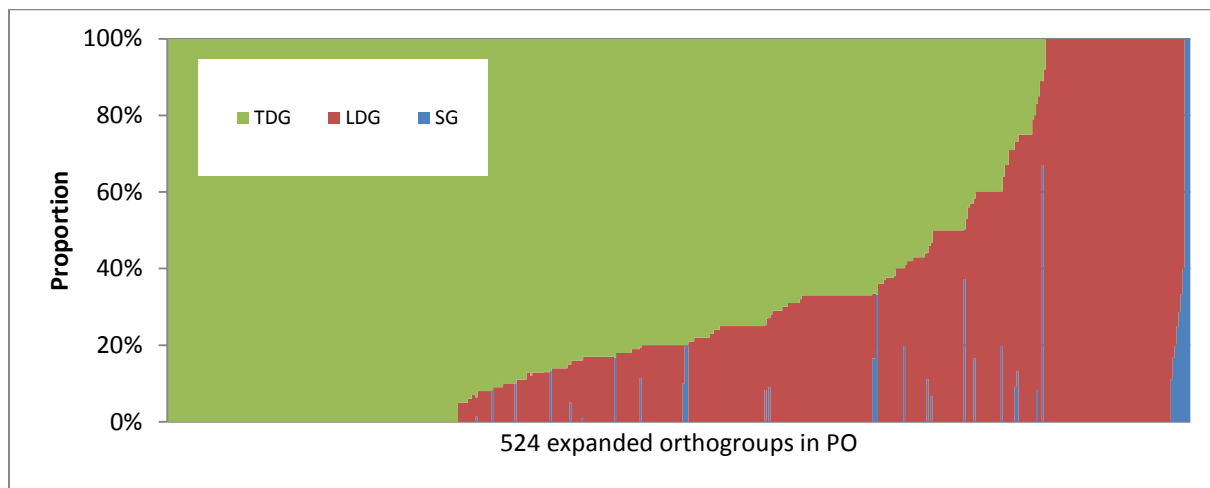

2229

2230

2231

2232 **Supplementary Fig. 20** Identification of speciation and duplication events in the pedunculate  
 2233 oak genome. Illustration of the  $K_s$  distribution ( $x$ -axis) of gene pairs ( $y$ -axis) observed for oak  
 2234 (*Quercus robur*)/peach (*Prunus persica*) orthologs (green) and for grape (blue), peach (red),  
 2235 cocoa (brown) and oak (purple) paralogs. The oak/peach ortholog  $K_s$  distribution defines the  
 2236 position of the speciation event between these two species, with a single ancestral triplication  
 2237 event ( $\gamma$ ) common to grape, peach, cocoa and oak and predating the speciation event. The  
 2238 burst of tandem duplicates highlighted by the purple  $K_s$  peak occurred after oak/peach  
 2239 speciation and appears to be an oak-specific event.  $K_s$  values for grape, peach and cocoa  
 2240 paralogous gene pairs were restricted to the  $\gamma$  triplication as a matter of comparison to the  
 2241 corresponding ancestral polyploidization event in oak.

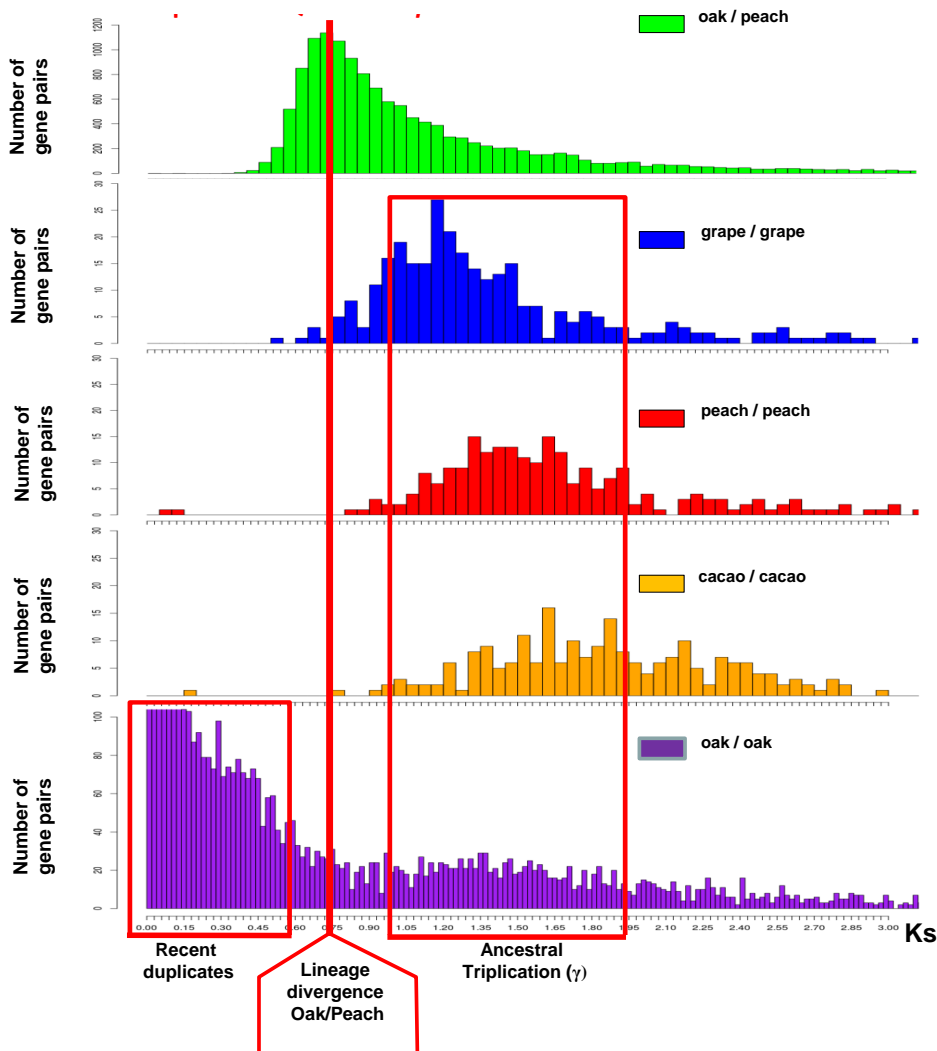

2242

2243

2244

2245 **Supplementary Fig. 21** Dot plot representation of duplicates and extracted tandemly  
2246 duplicated genes (TDGs). Dot plot representation of the pedunculate oak genome against  
2247 itself for the complete set of paralogous pairs (left) and extracted TDGs (right).

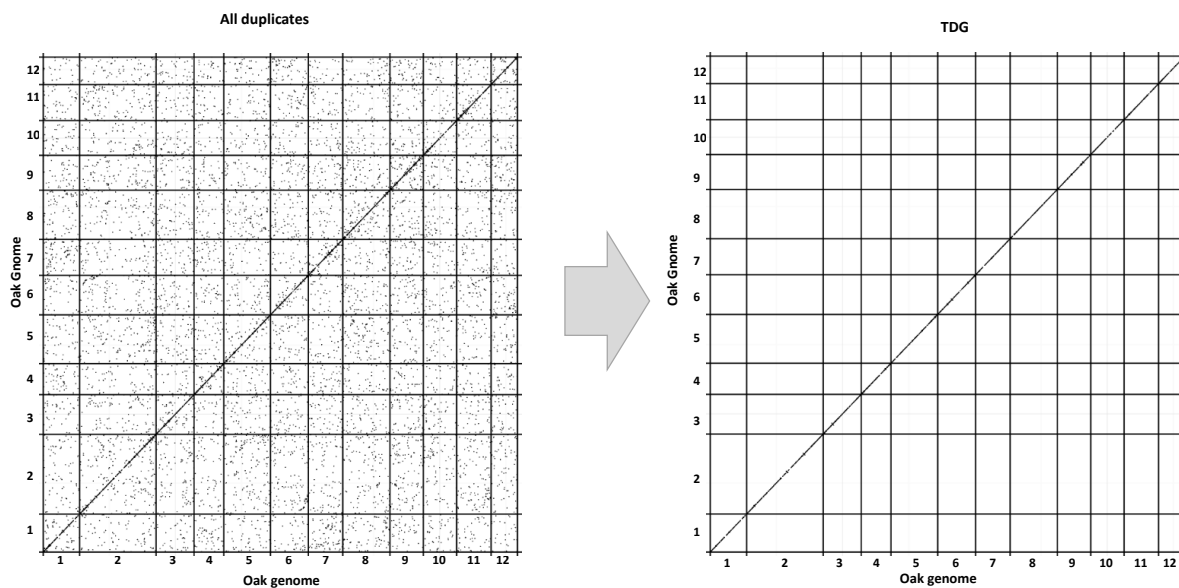

2248

2249

2250 **Supplementary Fig. 22** Validation of tandemly duplicated genes in pedunculate oak. **(A)**  
2251 Distribution of the proportion of gap characters in the alignments. **(B)** Distribution of the  
2252 proportion of variable sites (SNPs) in the alignments, expressed as a ratio of the number of  
2253 variable sites to total alignment length, after the exclusion of gap positions. Below each plot, a  
2254 box plot shows the 2.5th, 25th, 50th, 75th and 97.5th percentiles. Summary statistics for the  
2255 11,695 tandem duplicate pairs (black curve), and the 12,603 allelic pairs (light gray curve)  
2256 identified by comparing the sets of genes in the diploid and haploid versions of the pedunculate  
2257 oak reference genome. Pairwise nucleotide sequence alignments were performed with  
2258 MUSCLE.

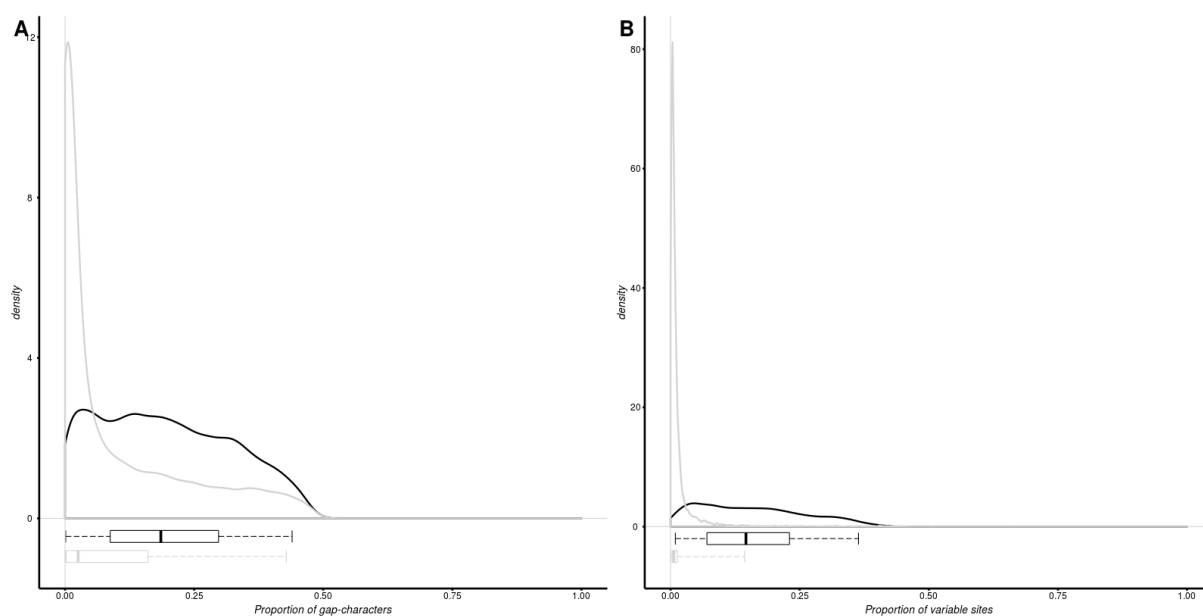

2259  
2260  
2261

2262 **Supplementary Fig. 23** Genome coverage distribution of the longest scaffold (black) and  
2263 coverage distribution of tandemly duplicated genes (red).

2264

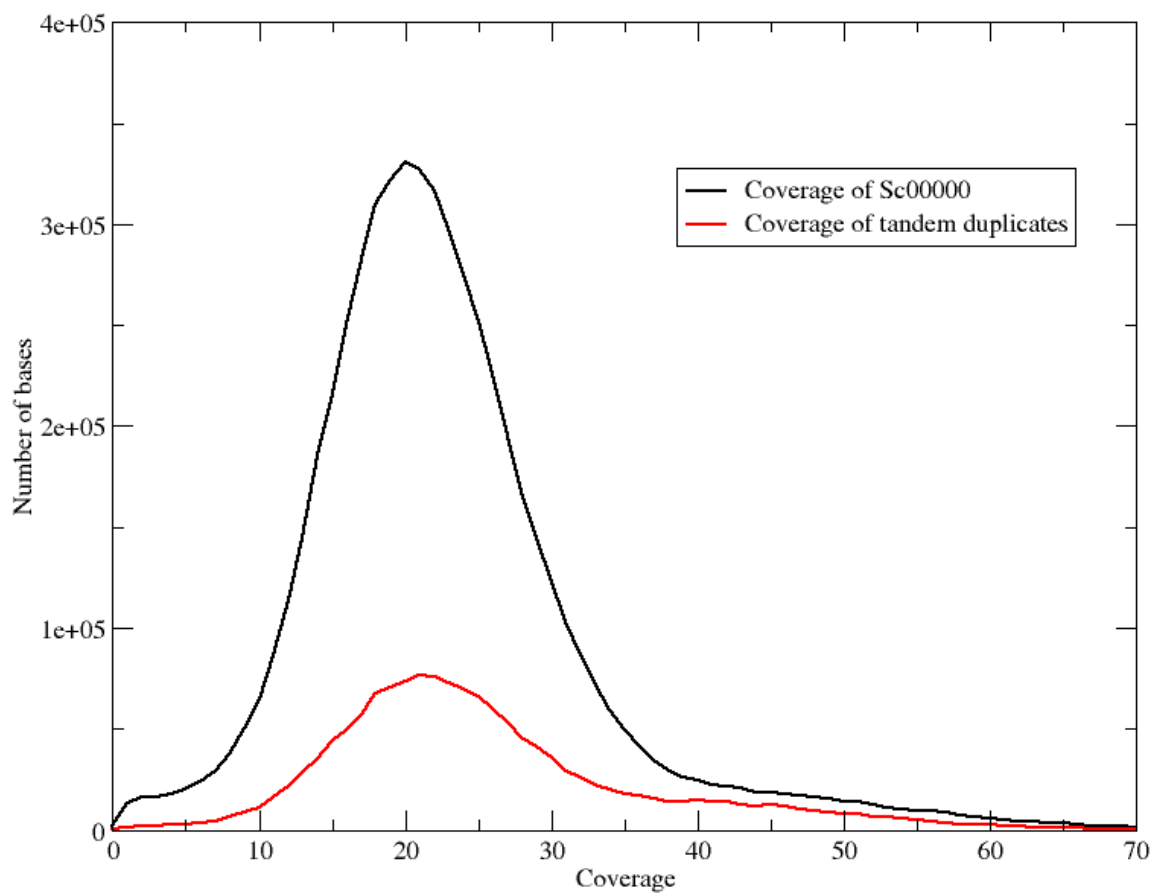

2265

2266

2267

2268 **Supplementary Fig. 24** Box plot of the number of genes per orthoMCL cluster for each of  
2269 the 16 species studied, including pedunculate oak. Species initials refer to **Supplementary**  
2270 **Table 7**. Sample size for each species is indicated in **Supplementary Table 22**. A Tukey box  
2271 plot was used. The bottom and top of the box are the 25<sup>th</sup> and 75<sup>th</sup> percentile (the lower and  
2272 upper quartiles, respectively), thus delineating the interquartile range (IQR). The band near  
2273 the middle of the box is the 50<sup>th</sup> percentile (i.e. the median). For the ends of the whiskers we  
2274 used the default box plot parameter for statistical dispersion in R (1.5\*IQR).

2275

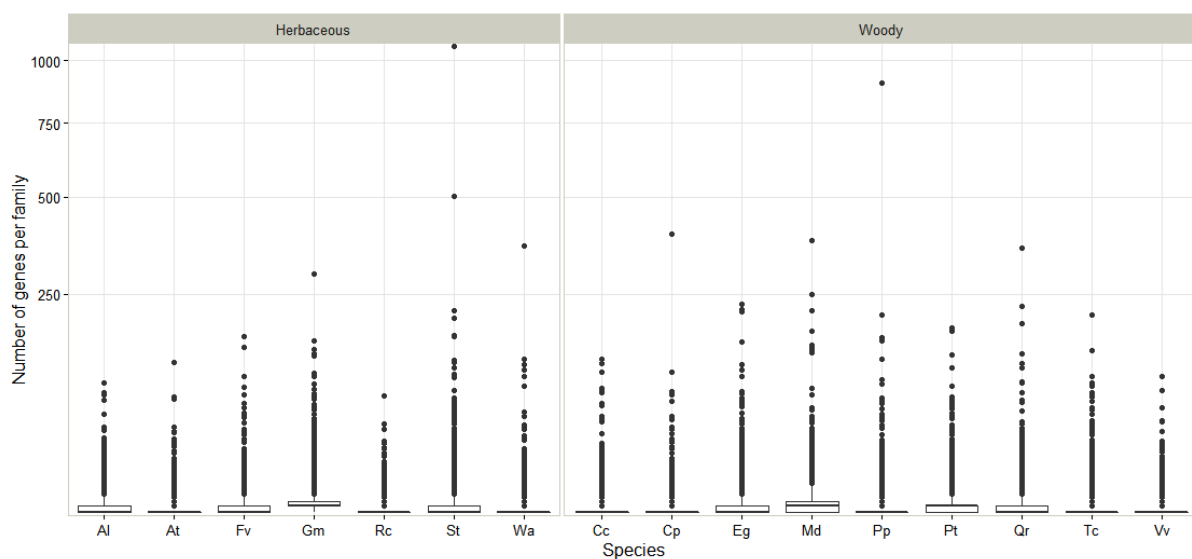

2276

2277

2278

2279

2280



2281 **Supplementary Fig. 25** GenomeScope output generated from the 31-mers distribution. The  
2282 size of the pedunculate oak haploid genome was at 736 Mb.

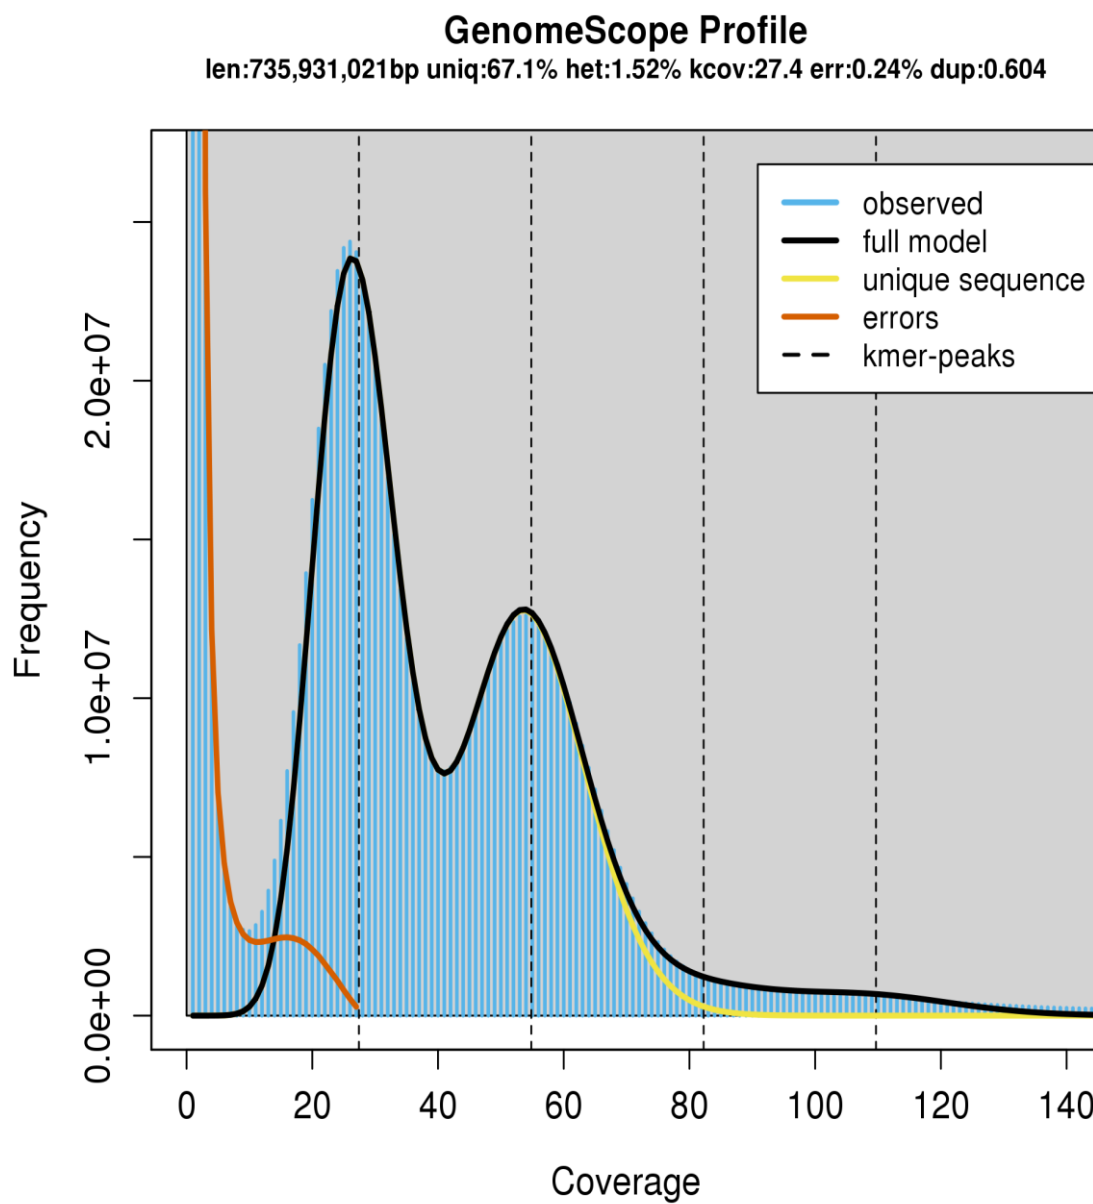

2283

2284

2285 **Supplementary Fig. 26** Comparison of allelic BAC structures of the reference Pedunculate  
 2286 oak genotype “3P”. Manually curated genes are represented as green arrows with the head  
 2287 indicating the direction of transcription. Repetitive elements are represented as purple boxes.  
 2288 (A) 5E10\_107I07, (B) 27L03\_48K01, (C) 12J01\_121F17, (D) 50E24\_177A20, (E)  
 2289 64H03\_30P01.

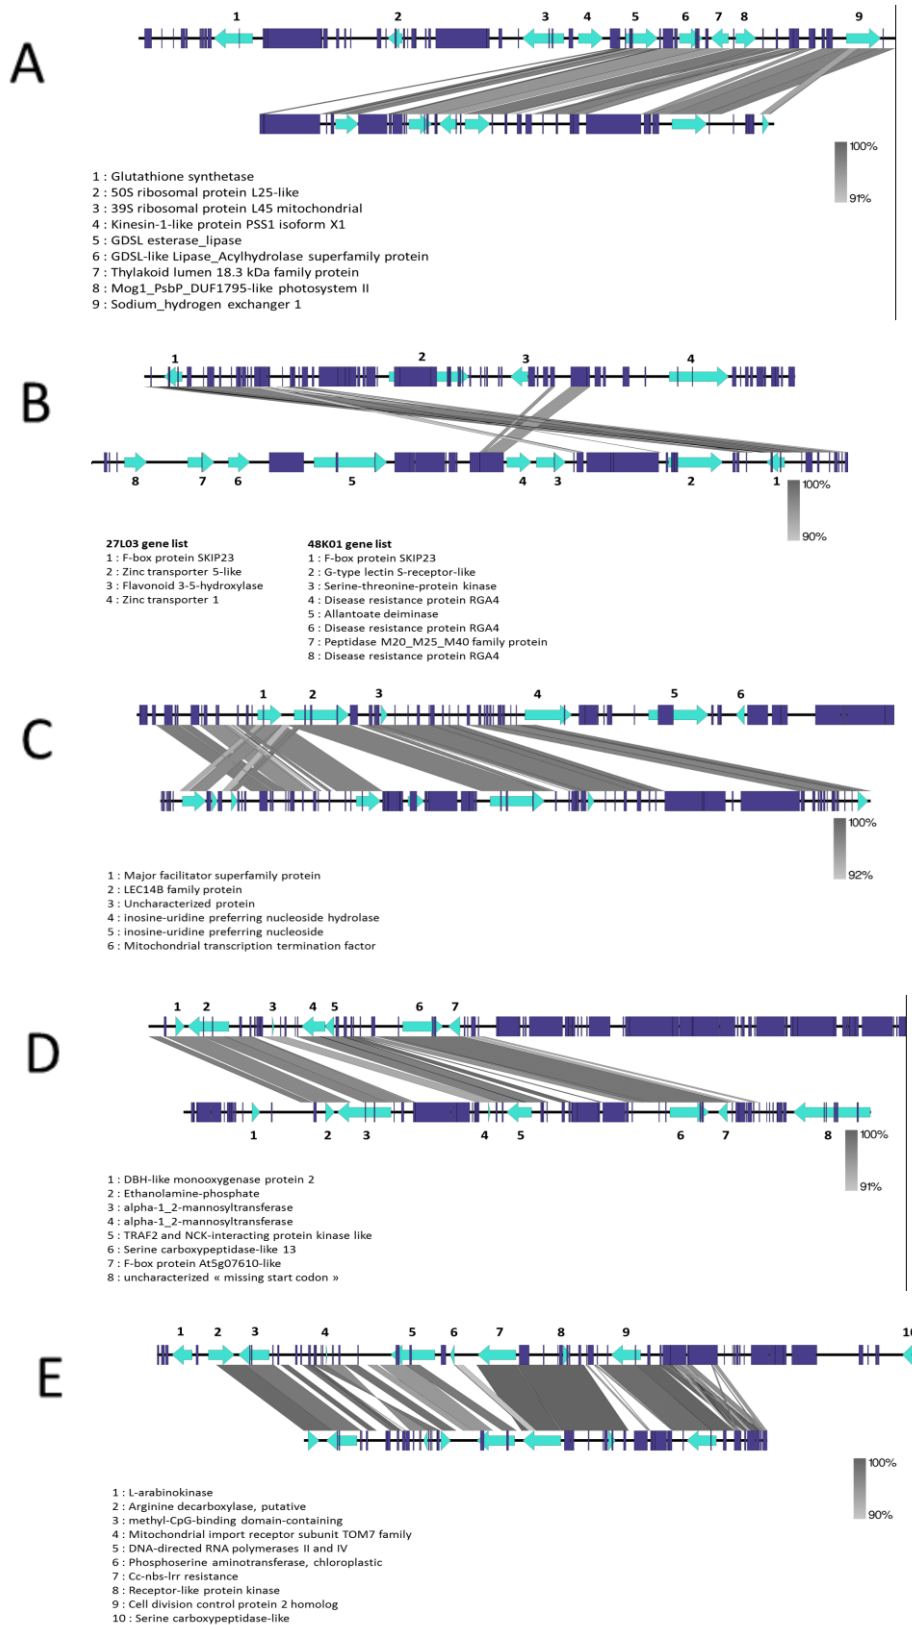

2290

2291 **Supplementary Fig. 27** Alignment of two allelic BACs (#50E24 and #177A20) against the  
 2292 V1 diploid assembly (scaffold #1466). Gray boxes represent nucmer alignments, blue  
 2293 rectangles correspond to SNPs specific to BAC #177A20 and red rectangles to SNPs specific  
 2294 to BAC #50E24. Green boxes correspond to flanking transposable elements.

2295

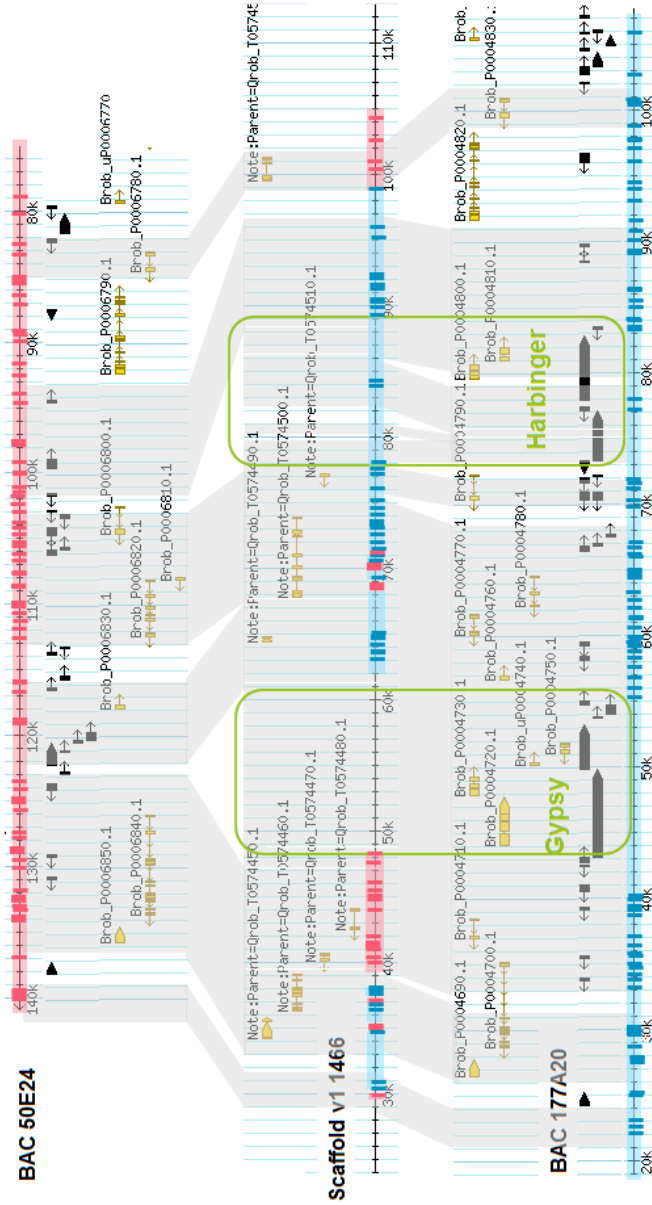

2296

2297

2298 **Supplementary Fig. 28** Alignment of two allelic BACs (#12J1 and #121F17) against the V1  
 2299 diploid assembly (scaffold #3597). Gray boxes represent NUCmer alignments, blue rectangles  
 2300 correspond to SNPs specific to BAC #121F17 and red rectangles to SNPs specific to BAC  
 2301 #12J1. Green boxes correspond to flanking transposable elements.

2302

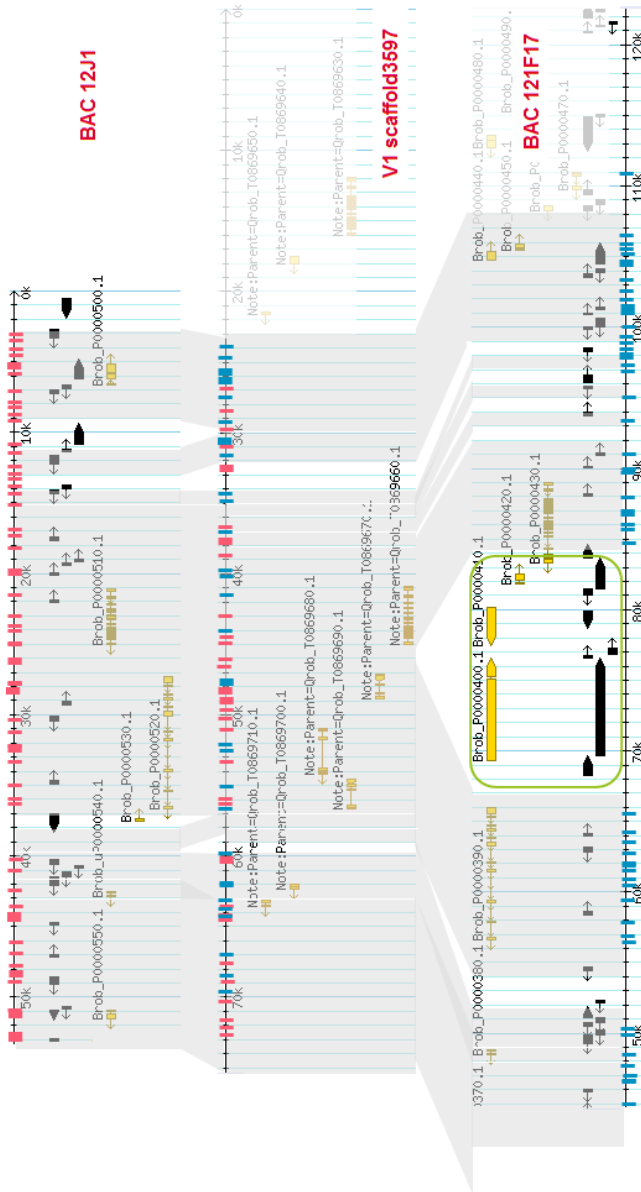

2303

2304

2305 **Supplementary Fig. 29** Alignment of two allelic BACs (#107I07 and #5E10) against the V1  
 2306 diploid assembly (scaffolds #282 and #1030). Gray boxes represent NUCmer alignments, blue  
 2307 rectangles correspond to SNPs specific to BAC #107I07 and red rectangles to SNPs specific  
 2308 to BAC #5E10. Green boxes correspond to flanking transposable elements.

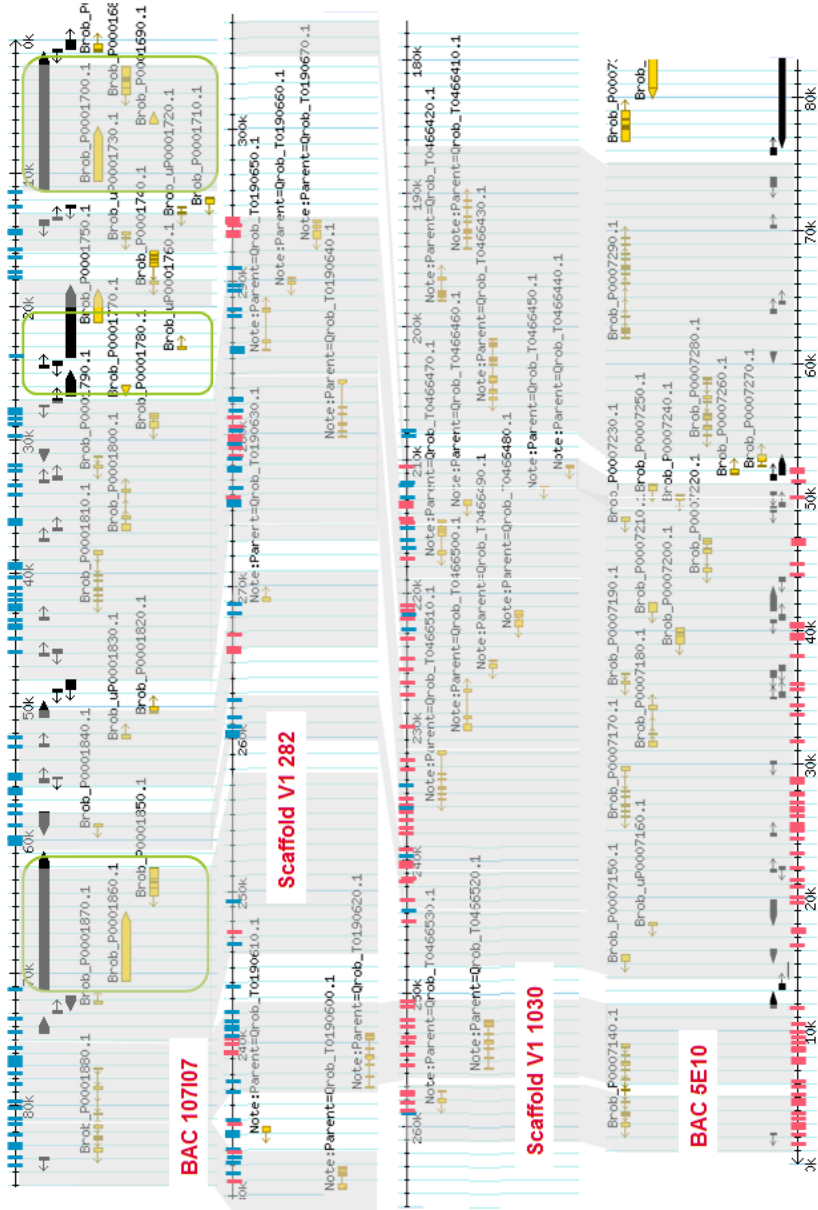

2309  
 2310  
 2311

2312 **Supplementary Fig. 30** Flow chart indicating the procedure leading to the identification of  
2313 the 4,070 mapped markers (2,127+1,943) of the oak genome browser “marker” track.

2314

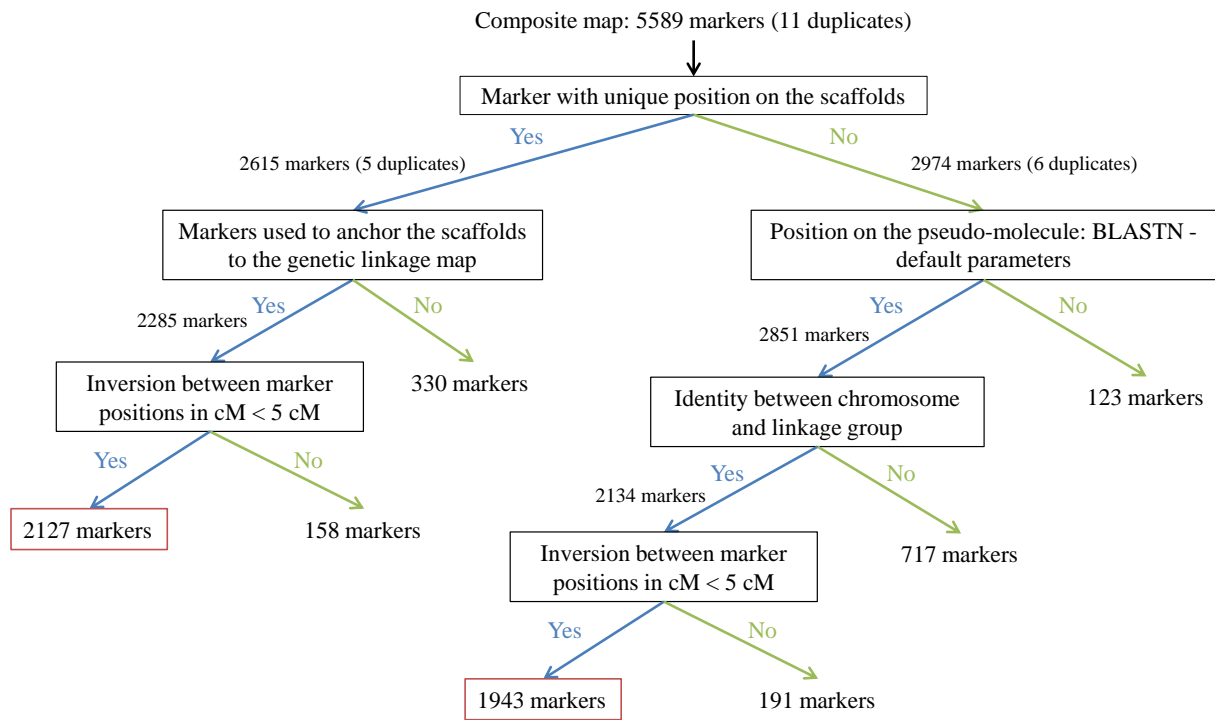

2315

2316 **Supplementary Fig. 31** High-density genetic linkage map of the pedunculate oak genome  
2317 (5,589 markers) showing the map positions of the 4,070 markers aligned on the 12  
2318 chromosomes, with possible inversion tolerated within a 5 cM interval.

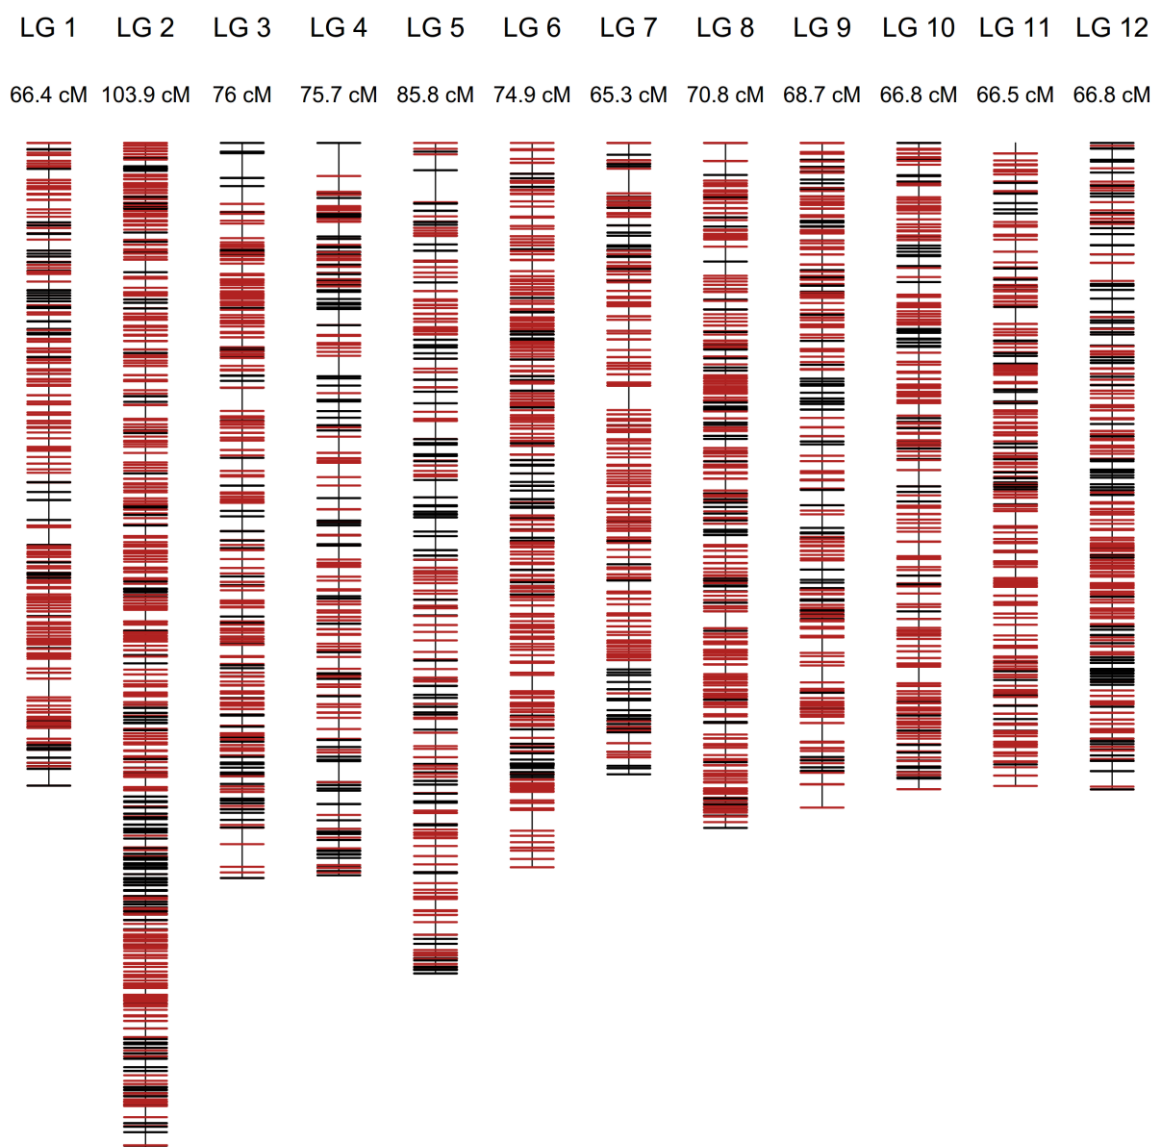

2319

2320 **Supplementary Fig. 32** Physical – genetic relationships. Left panels- Physical position (in  
 2321 Mb on the haplome) and genetic location (in cM on the composite linkage map) for 4,070  
 2322 markers used to populate the “marker” track of the pedunculate oak genome browser.  
 2323 Inversions between marker assignments on the genetic and physical maps are tolerated within  
 2324 a 5 cM window. Set#1 and set#2 markers from **Supplementary Data Set 3 sheet #1** are  
 2325 indicated by blue and red dots, respectively. Right panels- recombination rate along the 12  
 2326 chromosomes (chr 1-12).

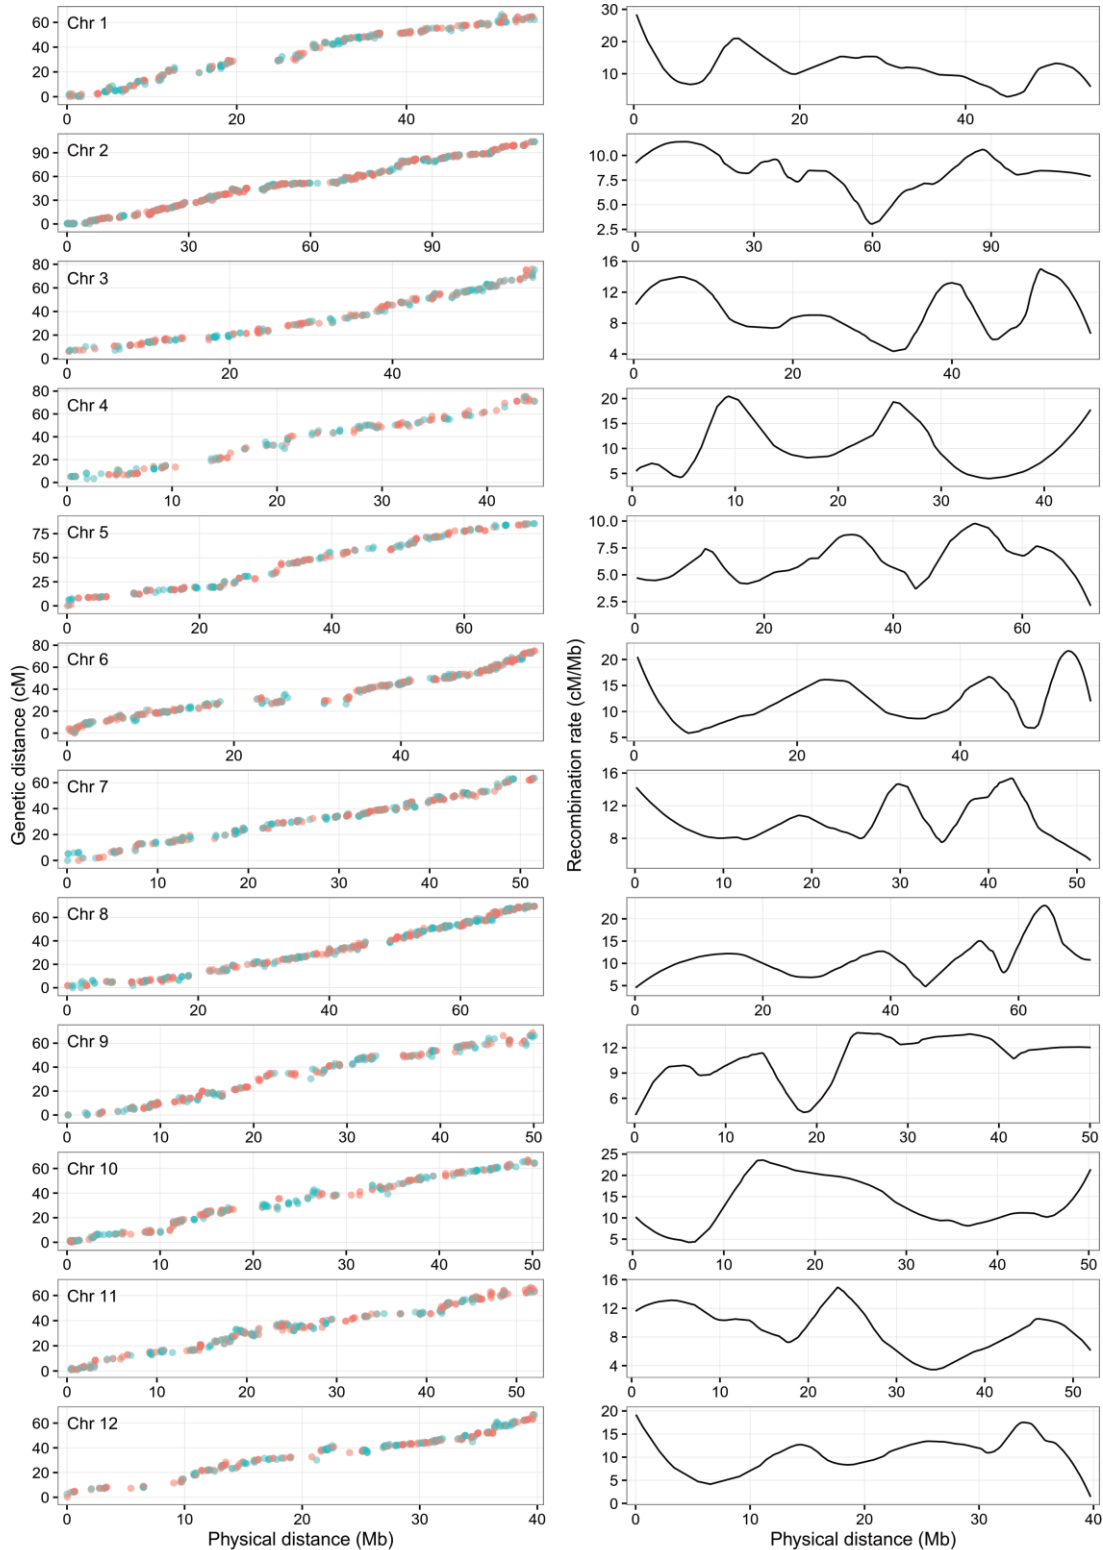

2327



2328 **Supplementary Fig. 33** TE vs non-TE content in the 16 sequenced genomes considered in  
 2329 this study. The total in Mb (x-axis) corresponds to the fraction of the genome annotated. The  
 2330 tree on the left was generated with the NCBI Taxonomy Browser  
 2331 ([www.ncbi.nlm.nih.gov/Taxonomy/CommonTree/wwwcmt.cgi](http://www.ncbi.nlm.nih.gov/Taxonomy/CommonTree/wwwcmt.cgi)). Only the topology is shown  
 2332 and the branch lengths are not proportional to evolutionary divergence time.

2333

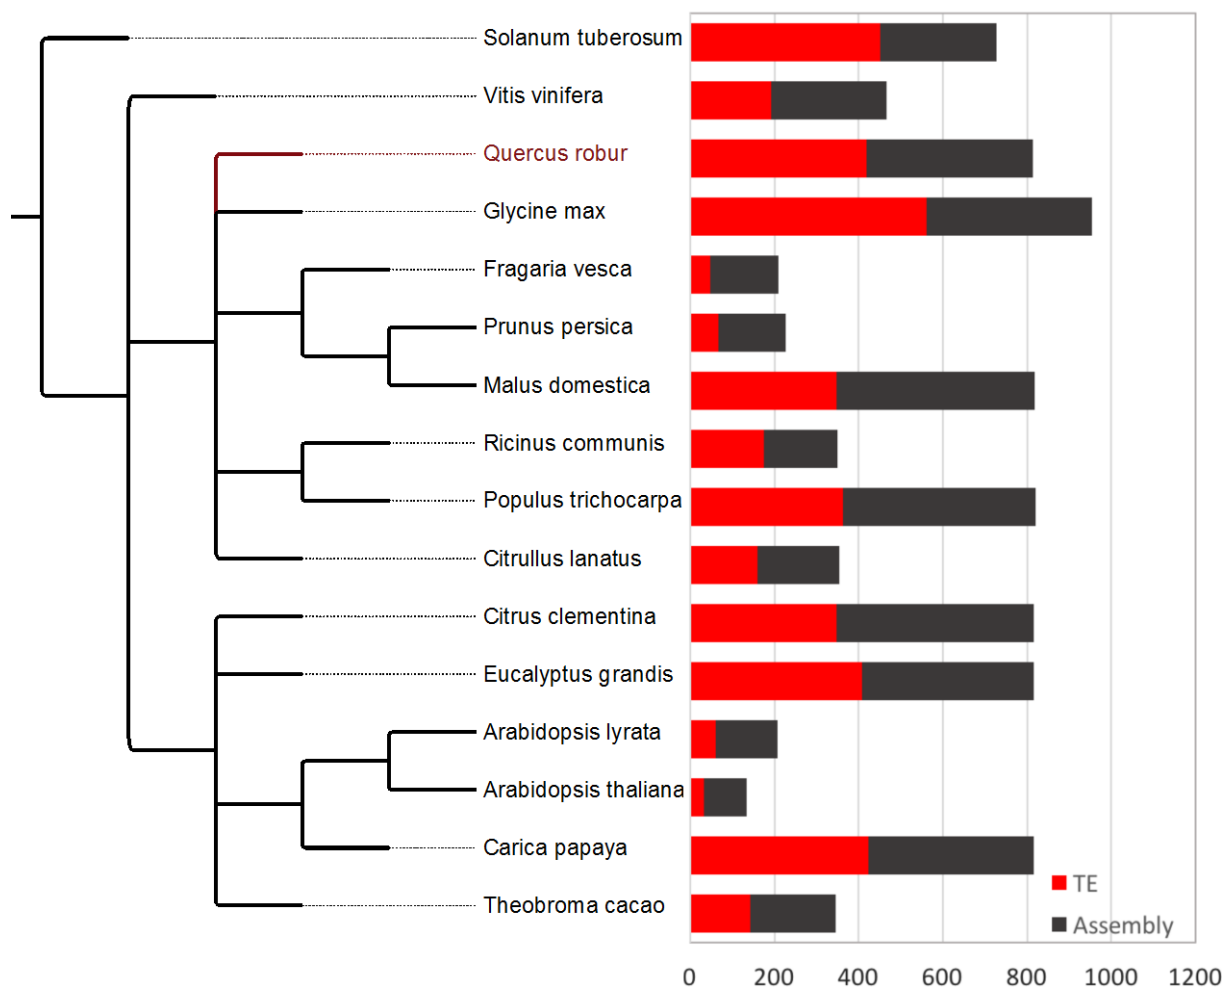

2334

2335

2336 **Supplementary Fig. 34** Endogenous viruses in the pedunculate oak genome. Phylogenetic  
 2337 reconstruction from the multiple sequence alignment of 58 reverse transcriptase domains from  
 2338 representative member from endogenous *Caulimoviridae* RTs found in the oak genome (blue  
 2339 branches, n=8), reference RT sequences from eight *Caulimoviridae* genera (n=41), Gypsy  
 2340 LTR retrotransposons (n=5), and from mammalian endogenous retroviruses (ERV, n=4).

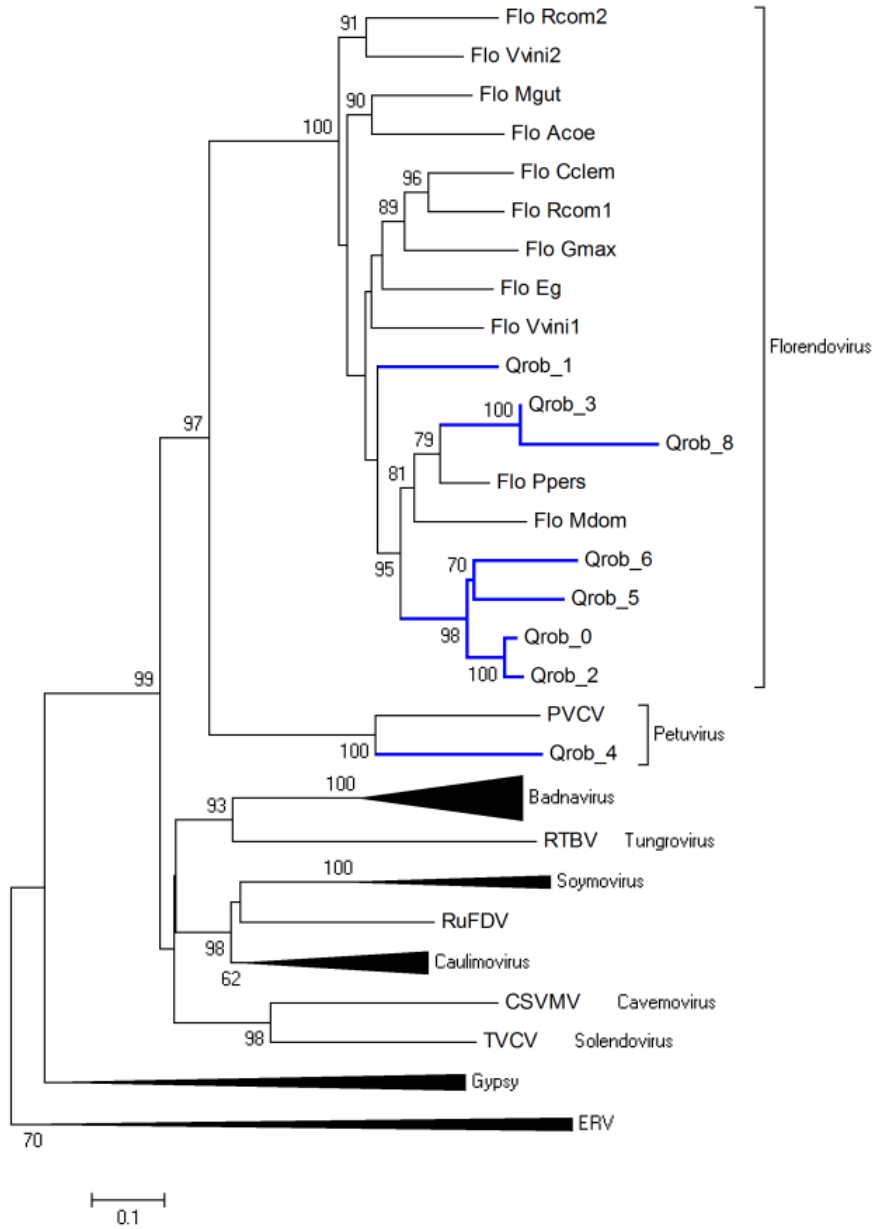

2341  
 2342  
 2343  
 2344

2345 **Supplementary Fig. 35** Highly repeated fragments of viruses. Overview of the multiple  
2346 sequences alignment of 762 highly similar fragments (raw data) from Caulimoviridae found  
2347 in the pedunculate oak genome.

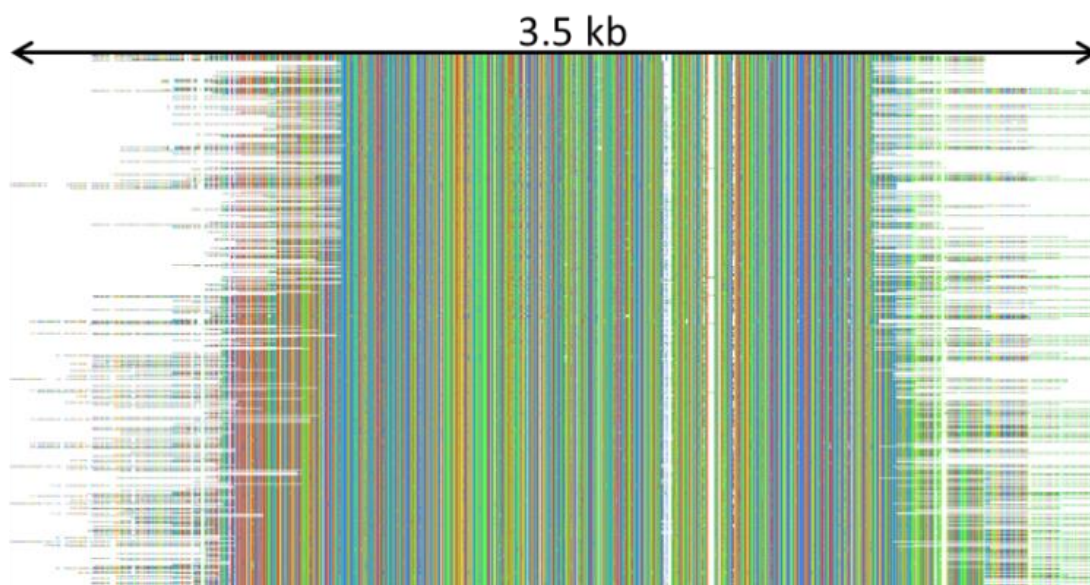

2348  
2349  
2350  
2351  
2352

2353 **Supplementary Fig. 36** Distribution of Caulimoviridae along the 12 pedunculate oak  
2354 chromosomes (Qrob\_Chr01-12), determined with sliding windows of 300 kb and an overlap  
2355 of 200 kb.

2356

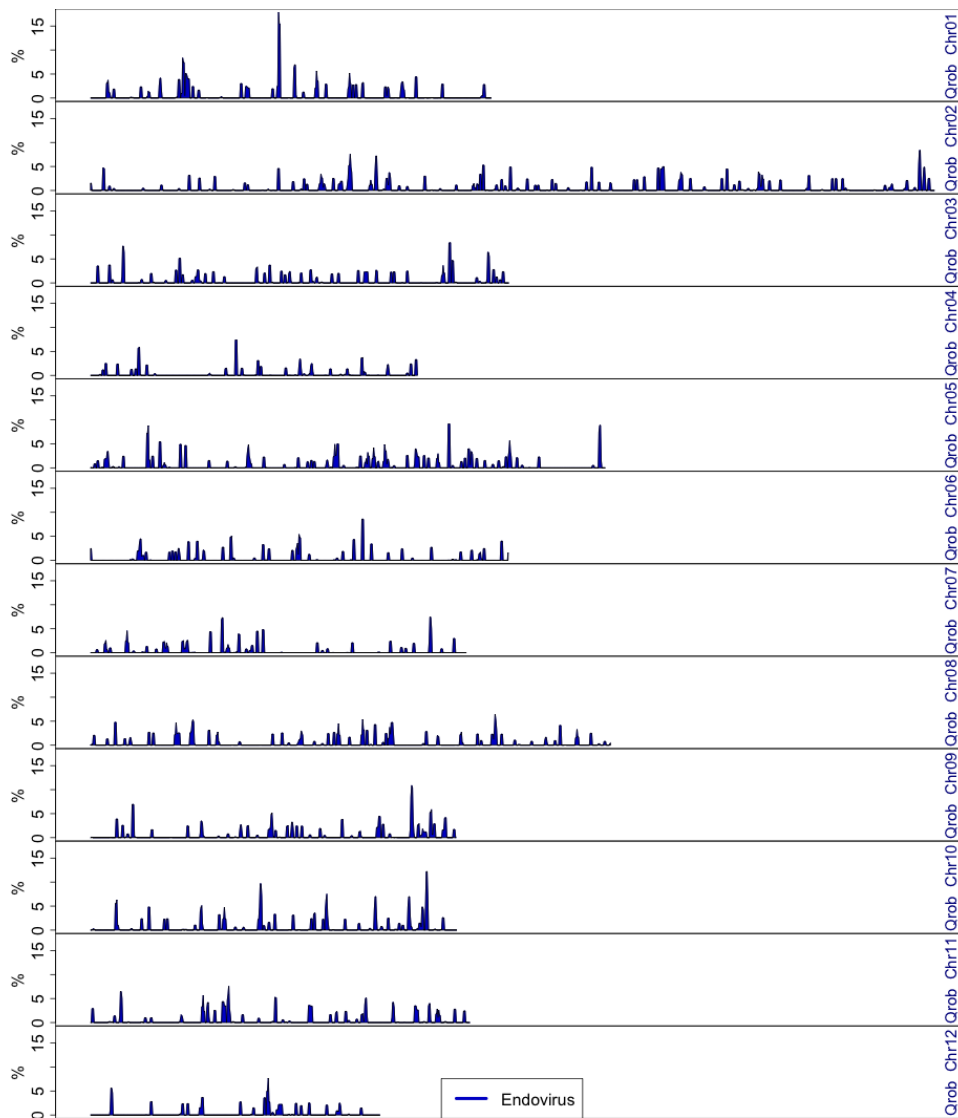

2357

2358

2359 **Supplementary Fig. 37** Evidence of protein functions according to annotation category:  
2360 BLAST/rpsBLAST (red), domain/motifs (green), and localization/targeting-based analysis  
2361 (blue).

2362

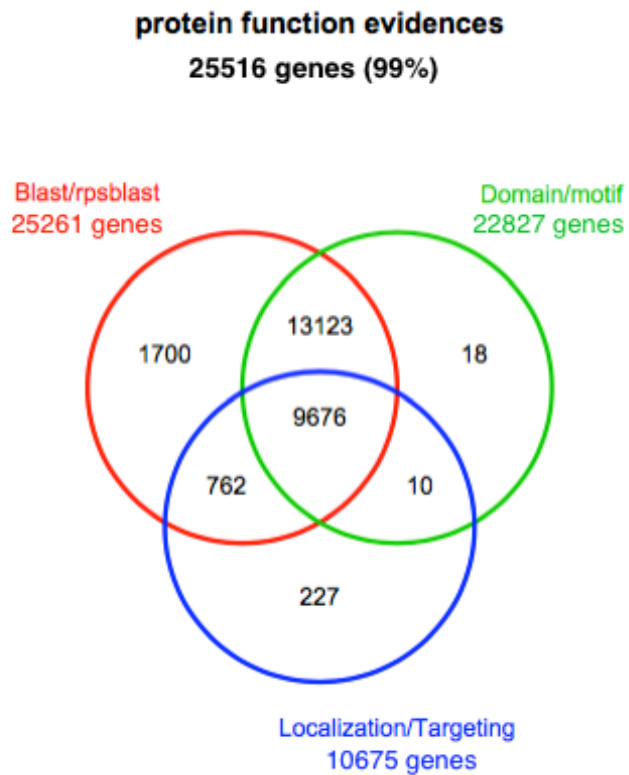

2363

2364

2365

2366 **Supplementary Fig. 38** Comparison of observed divergence of TE copies from their  
2367 respective consensus sequences, for different TE orders and superfamilies. DTX: Class II  
2368 (DNA) TIR, DHX: Class II Helitron, RLC: Class I LTR Copia, RLG: Class I LTR Gypsy,  
2369 RIX: Class I LTR other, RIX: Class I LINE, noCat: unclassified TE

2370

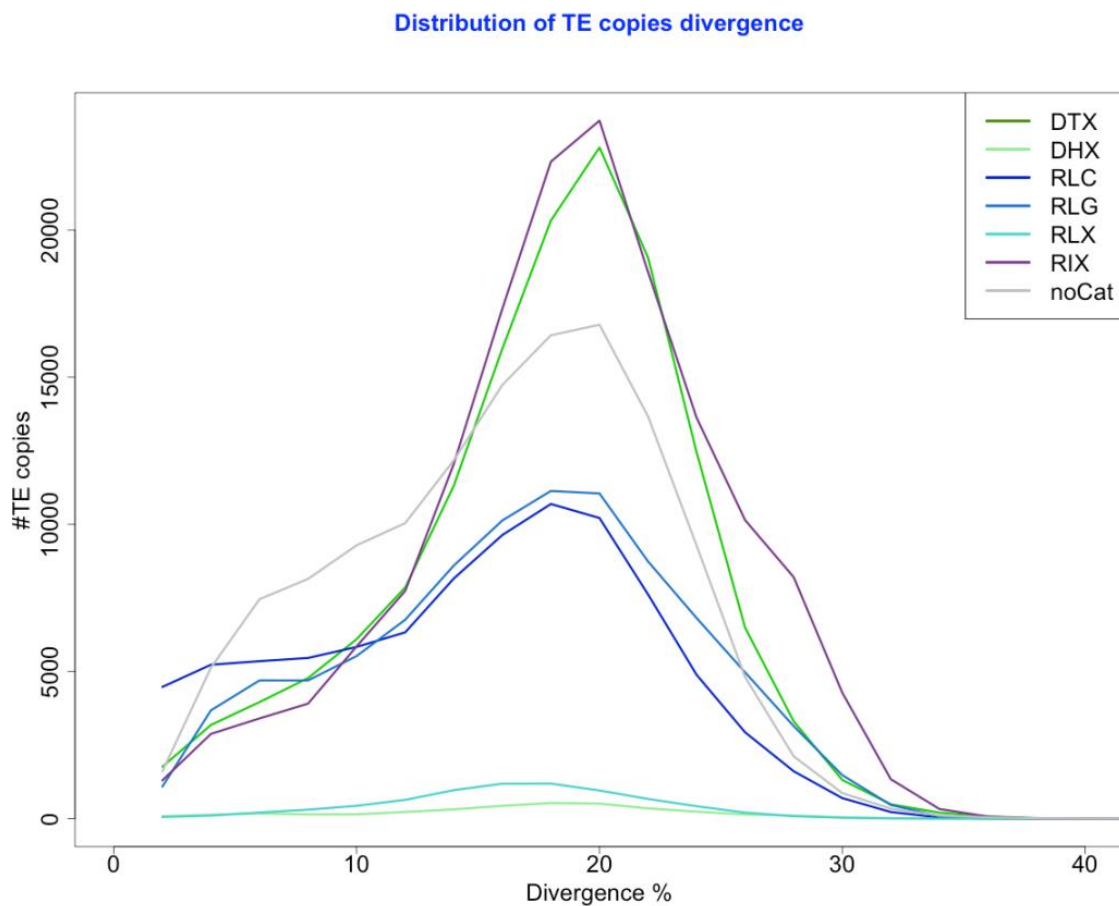

2371

2372

2373

2374

2375

2376 **Supplementary Fig. 39** Transpositional dynamics of nine highly repeated LTR-  
 2377 retrotransposon families in the oak genome. Histograms represent the age distribution of the  
 2378 retrotransposons, showing the asynchronism of retrotranspositional activity in pedunculate  
 2379 oak over the last six million years. The magenta curves represent local density estimates. The  
 2380 title of each histogram indicates the family name and its number of copies.

2381

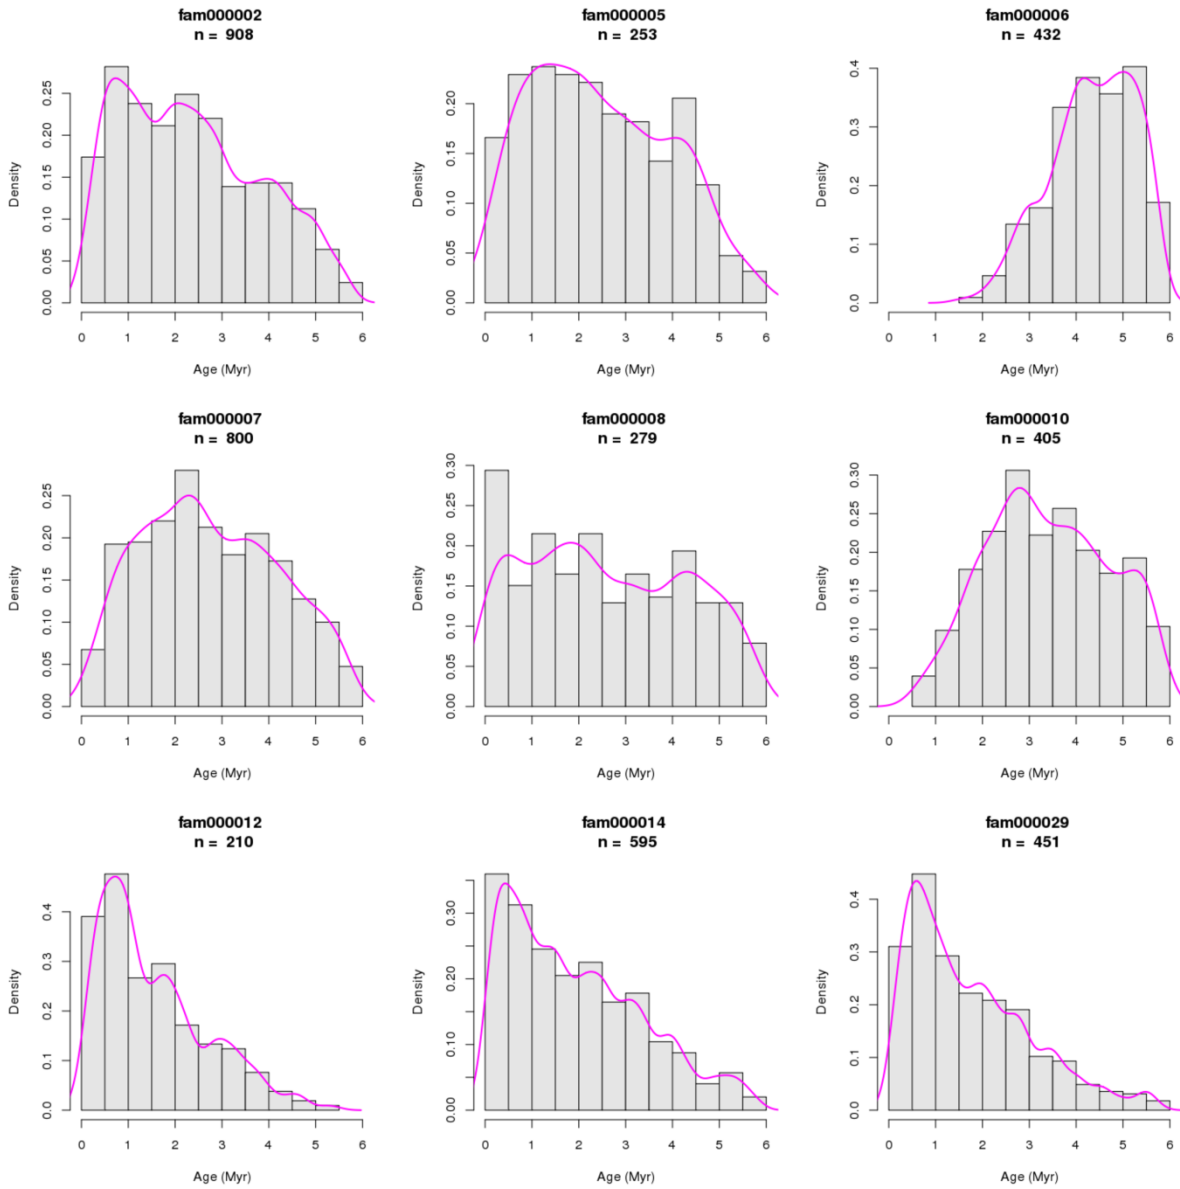

2382

2383

2384

2385

2386 **Supplementary Fig. 40** Distribution of TE (red area), genes (green area) and GC content  
2387 (blue line) along the 12 chromosomes (Qrob\_Chr01-12) of the pedunculate oak genome.

2388

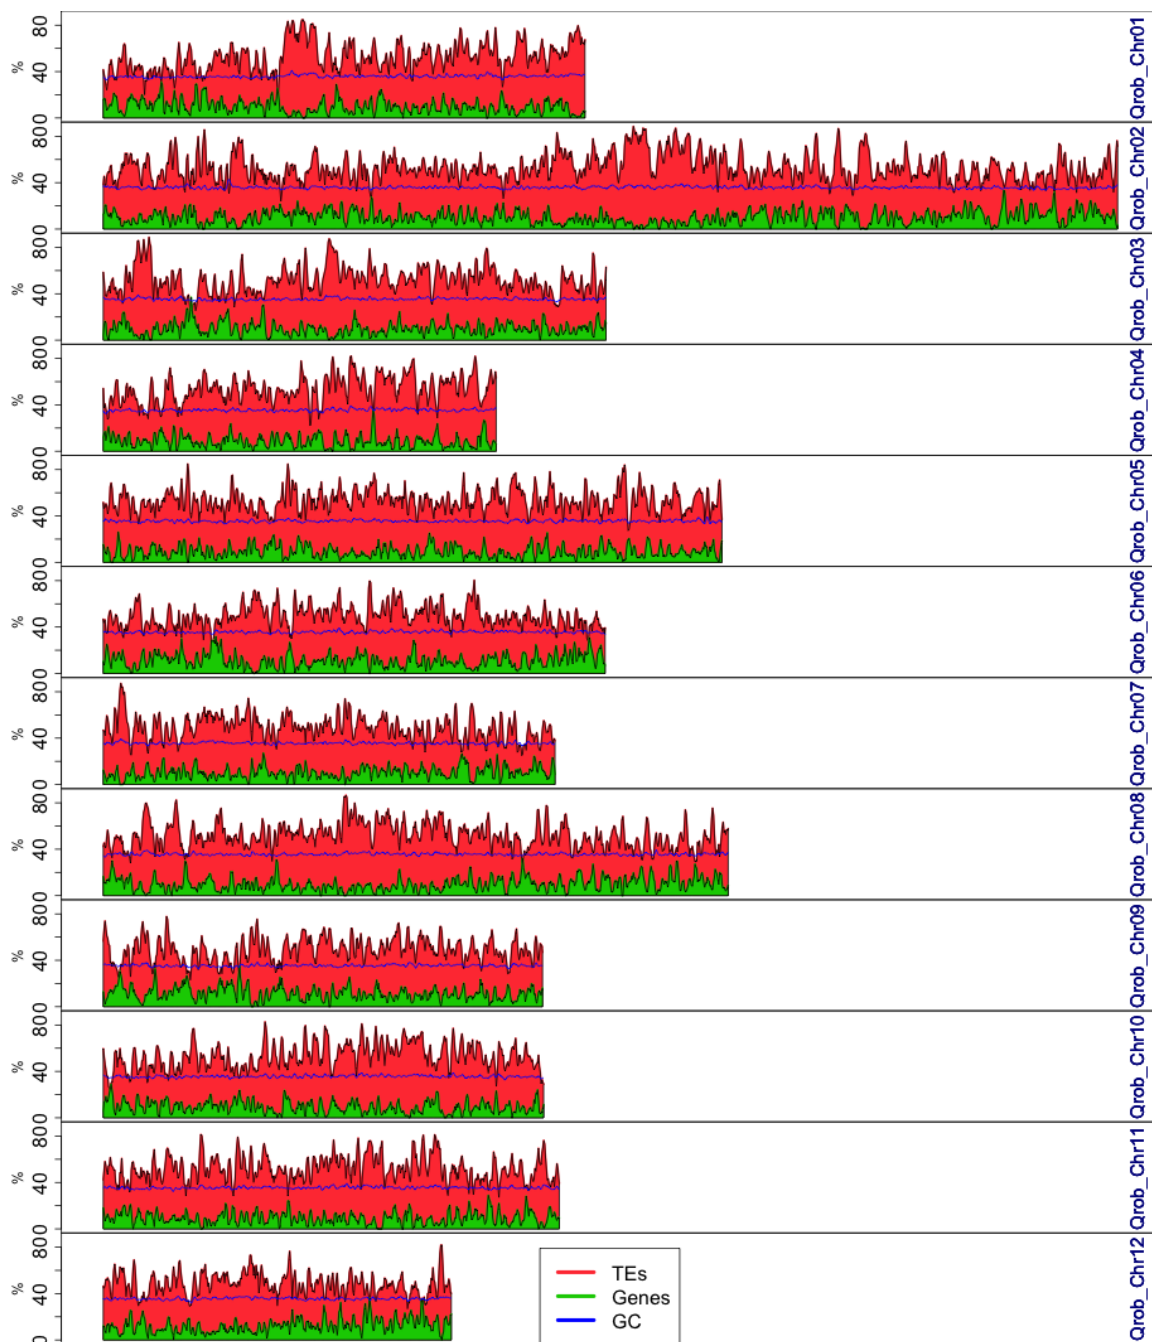



2391 **Supplementary Fig. 41** Distribution of the Gypsy (light-blue) and Copia (dark-blue)  
2392 superfamily of ClassI-LTR retrotransposons along the 12 chromosomes (Qrob\_Chr01-12) of  
2393 the pedunculate oak genome sequence.

2394

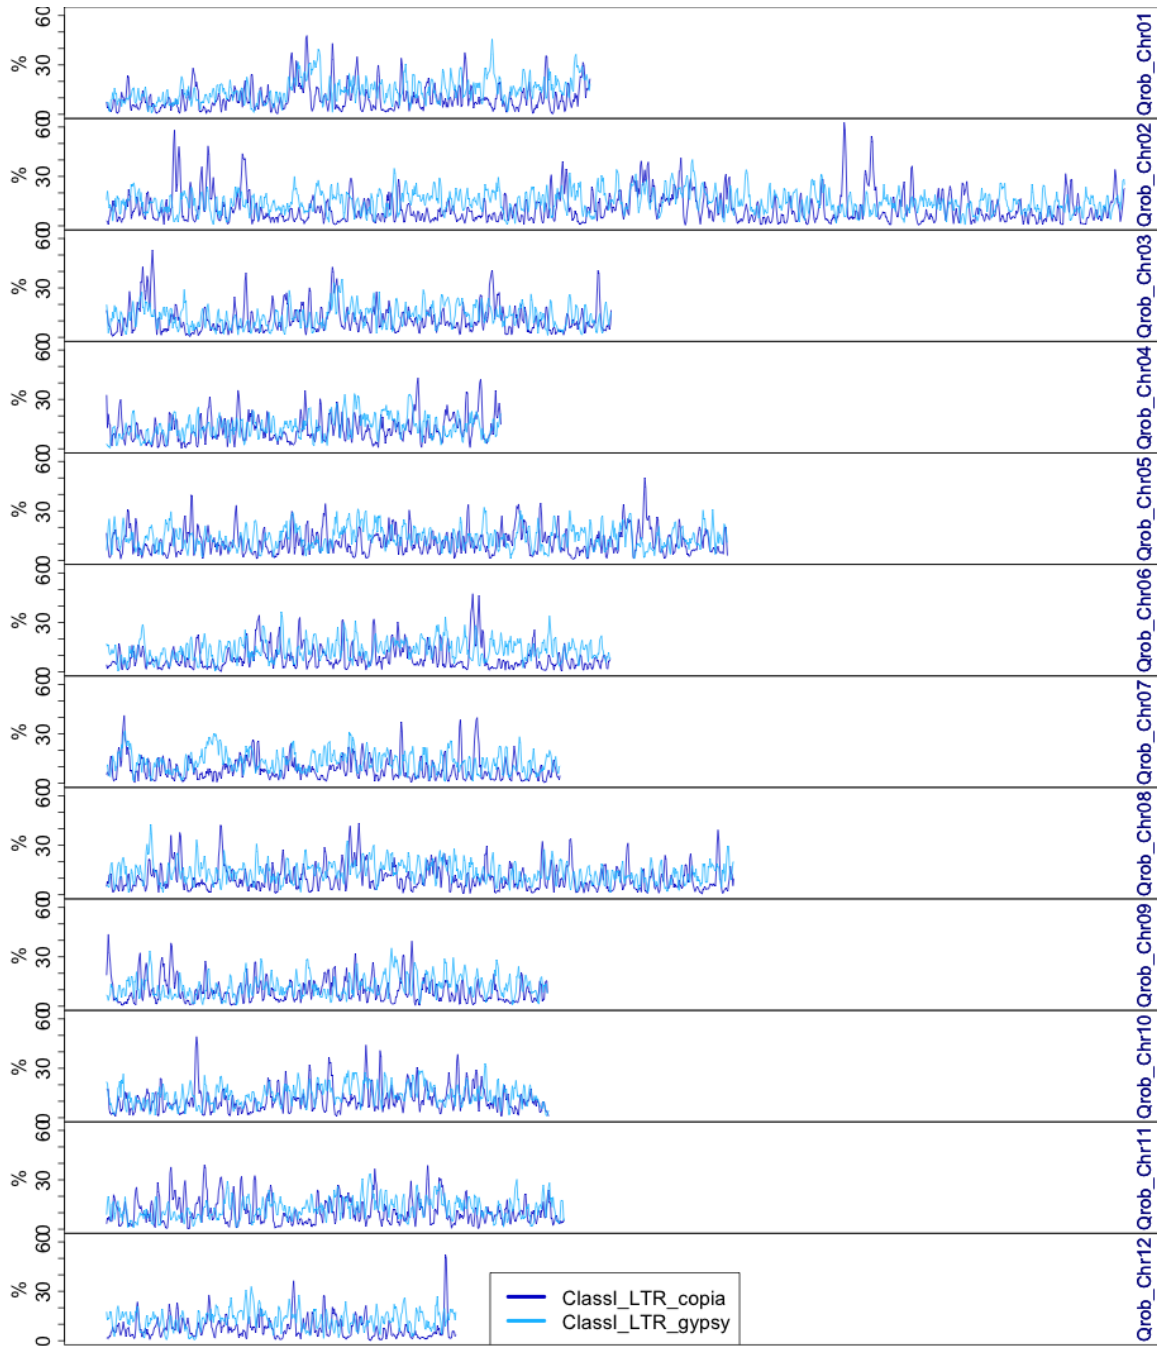

2395

2396

2397 **Supplementary Fig. 42** Comparison of gene-to-closest TE distance between genes from  
 2398 expanded gene families (n=5,433 genes) and genes from unchanged gene families (n=15,166  
 2399 genes). (A) Two classes of distance [1-500bp], [501-5000bp] Pearson's Chi-squared test with  
 2400 Yates' continuity correction:  $P\text{-value} = 2.2e^{-16}$ . (B) 10 classes of distance [1-500 bp], [501-  
 2401 1000 bp]...[4501-5000 bp] Pearson's Chi-squared test:  $P\text{-value} = 2.2e^{-16}$ .

2402

2403

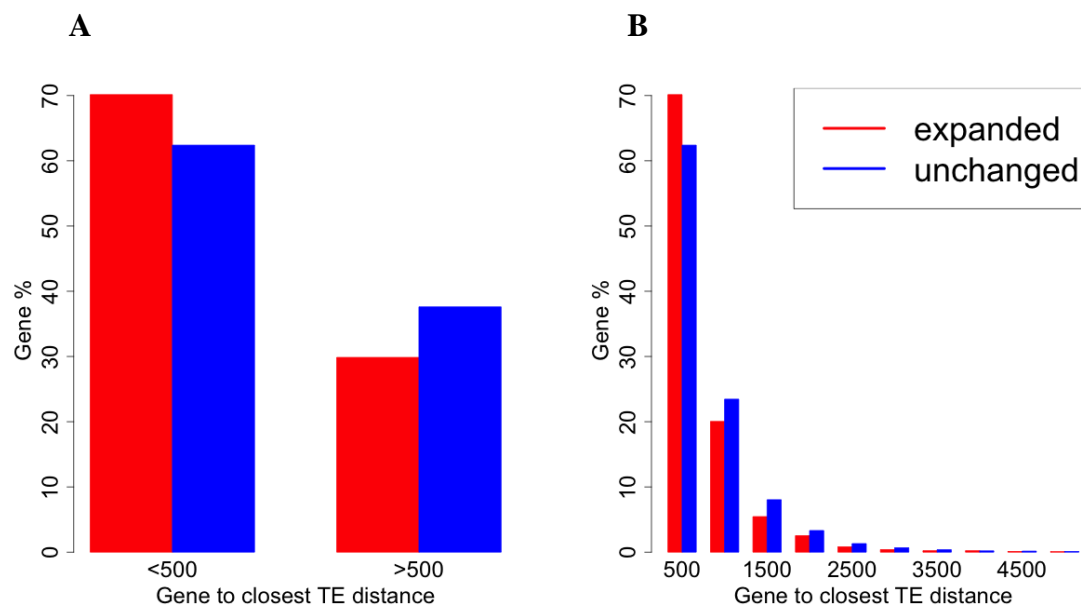

2404

2405

2406 **Supplementary Fig. 43** Comparison of gene-to-closest TE distance between sets of tandemly  
 2407 duplicated genes (TDG; n=8,532 genes) and single copy genes (SG; n=6,325 genes). (A) Two  
 2408 classes of distance [1-500 bp], [501-5000 bp] Pearson's Chi-squared test with Yates'  
 2409 continuity correction:  $P$ -value =  $2.2e^{-16}$ . (B) 10 classes of distance [1-500 bp], [501-1000  
 2410 bp]...[4501-5000 bp] Pearson's Chi-squared test:  $P$ -value =  $1.5e10^{-14}$ .

2411

2412

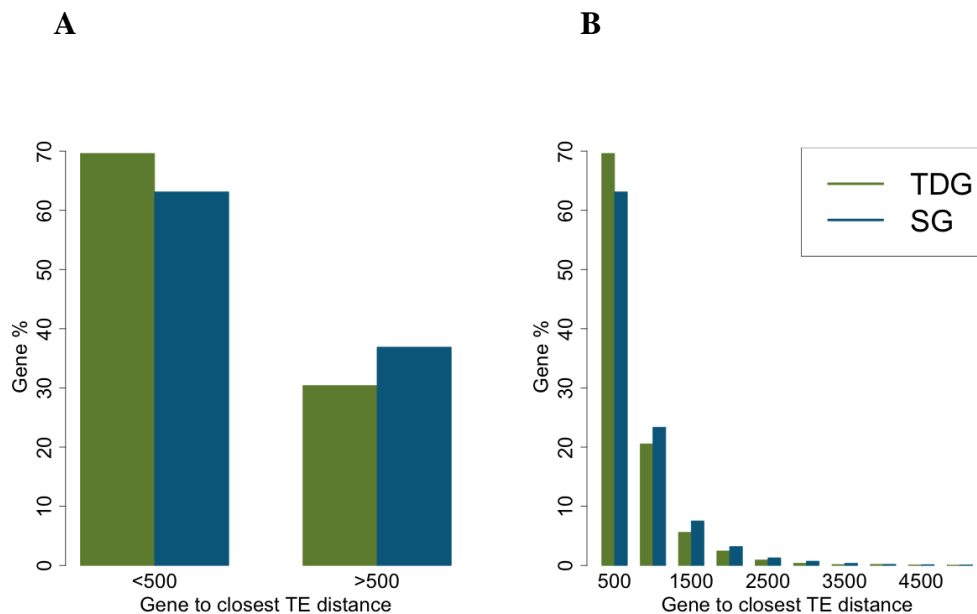

2413

2414

2415 **Supplementary Fig. 44** Phylogenetic analysis of aquaporins. (A) Proteins are from *Quercus*  
 2416 *robur* (Qrob, dot), *Arabidopsis thaliana* (At<sup>58</sup>) and *Populus trichocarpa* (Pt<sup>61</sup>). Protein  
 2417 sequences were compared in ClustalW analyses, and a consensus Neighbor-Joining tree was  
 2418 generated in MEGA6 (bootstrap: 500 replicates, distance based on number of differences  
 2419 method excluding gaps). (B) Exon-intron structure of *Quercus robur* aquaporins as displayed  
 2420 by GSDS2.0 (<http://gsds.cbi.pku.edu.cn/>).

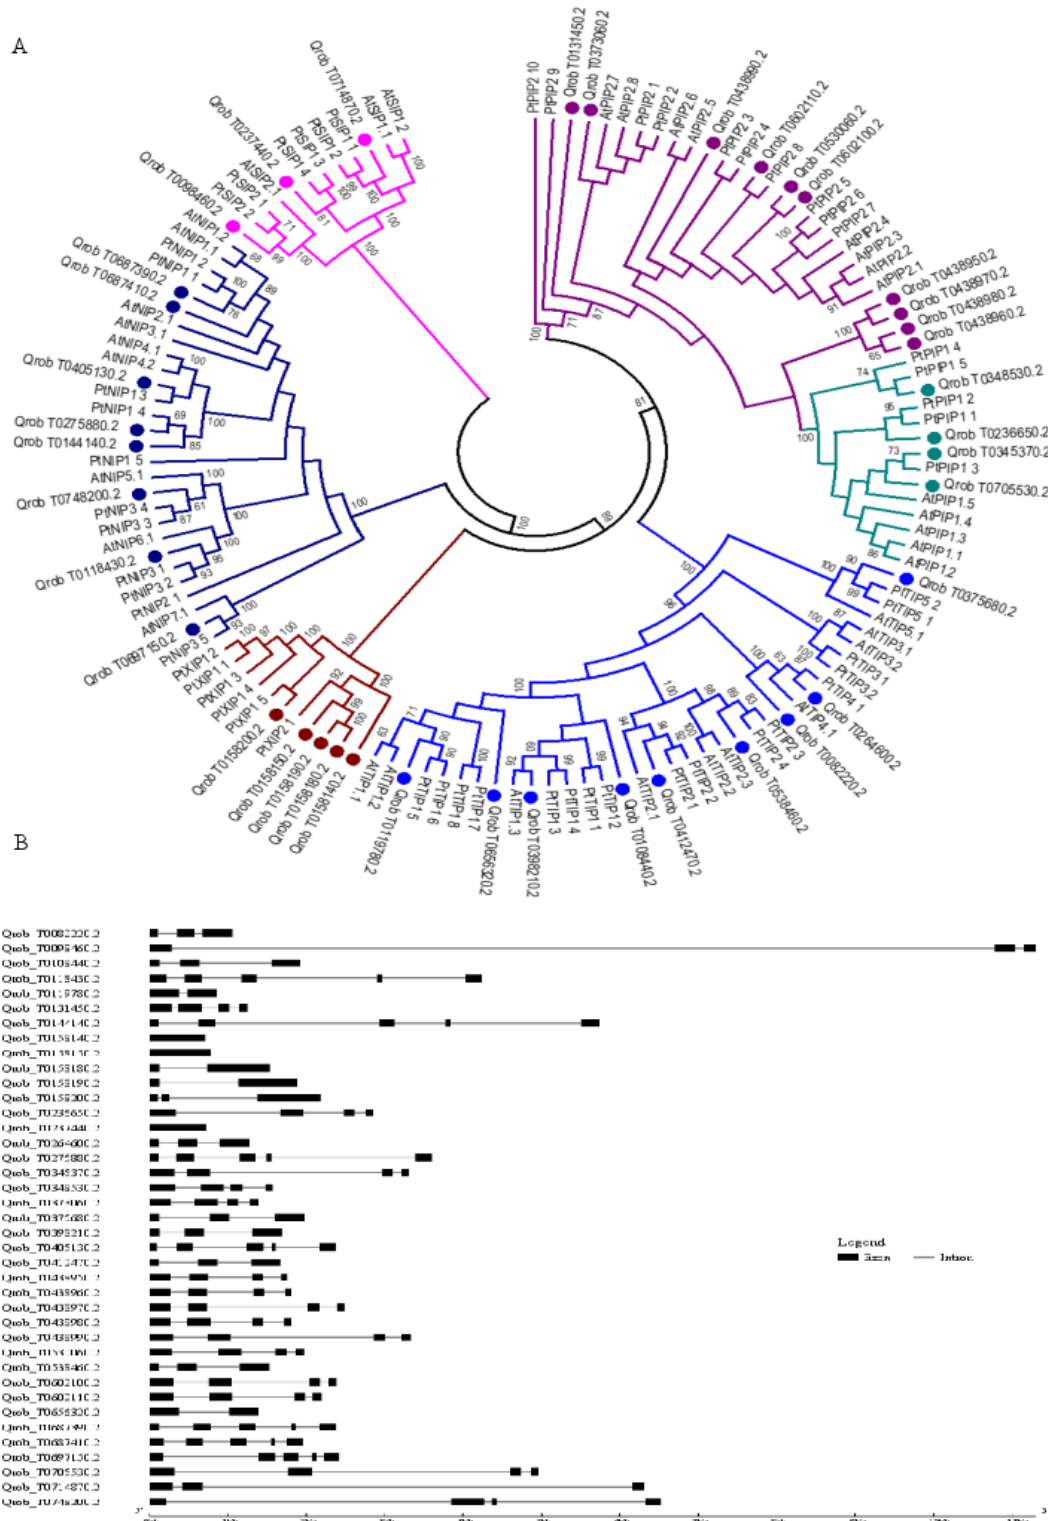

2422

2423 **Supplementary Fig. 45** Phylogenetic analysis of R2R3-MYB. R2R3-MYB proteins are from  
2424 *Quercus robur*, *Populus trichocarpa*, *Eucalyptus grandis*, *Vitis vinifera*, *Arabidopsis thaliana*  
2425 and *Oriza sativa*. The R2R3-MYB proteins selected for *E. grandis*, *V. vinifera*, *A. thaliana*  
2426 and *O. sativa* are the same as those used by Soler et al.<sup>63</sup>, except for *LOC\_Os01g62410*, which  
2427 was not used. For *P. trichocarpa*, the MYB proteins were selected as described by Chai et  
2428 al.<sup>172</sup>, except for Potri.003G1238001, Potri.015G143400.1, Potri.013G046300.1,  
2429 Potri.019G018400.2, Potri.006G097300.1, Potri.016G112300.1, and Potri.008G064200.1,  
2430 which were not included. These sequences were discarded after manual inspection. R2R3-  
2431 MYBs were aligned using MAFFT with the FFT-NS-i algorithm<sup>173</sup>, and a neighbour-joining  
2432 phylogenetic tree with 1000 bootstrap replicates was constructed with MEGA5<sup>174</sup>, with the  
2433 Jones–Taylor–Thornton substitution model used to calculate the evolutionary distances, a rate  
2434 of variation between sites with a gamma distribution of 1, and the comparison of sequences  
2435 with the complete deletion method. Bootstrap values are shown next to the branches. The tree  
2436 is drawn to scale, with branch lengths calculated on the basis of the number of amino-acid  
2437 substitutions per site. Each triangle represents a R2R3-MYB subgroup. Subgroup names are  
2438 included next to each clade, together with a short name to simplify nomenclature. The total  
2439 number of R2R3-MYB genes of each species, as a whole and for each subgroup, is also  
2440 included. Subgroups expanded in woody plants are highlighted in light orange or red.

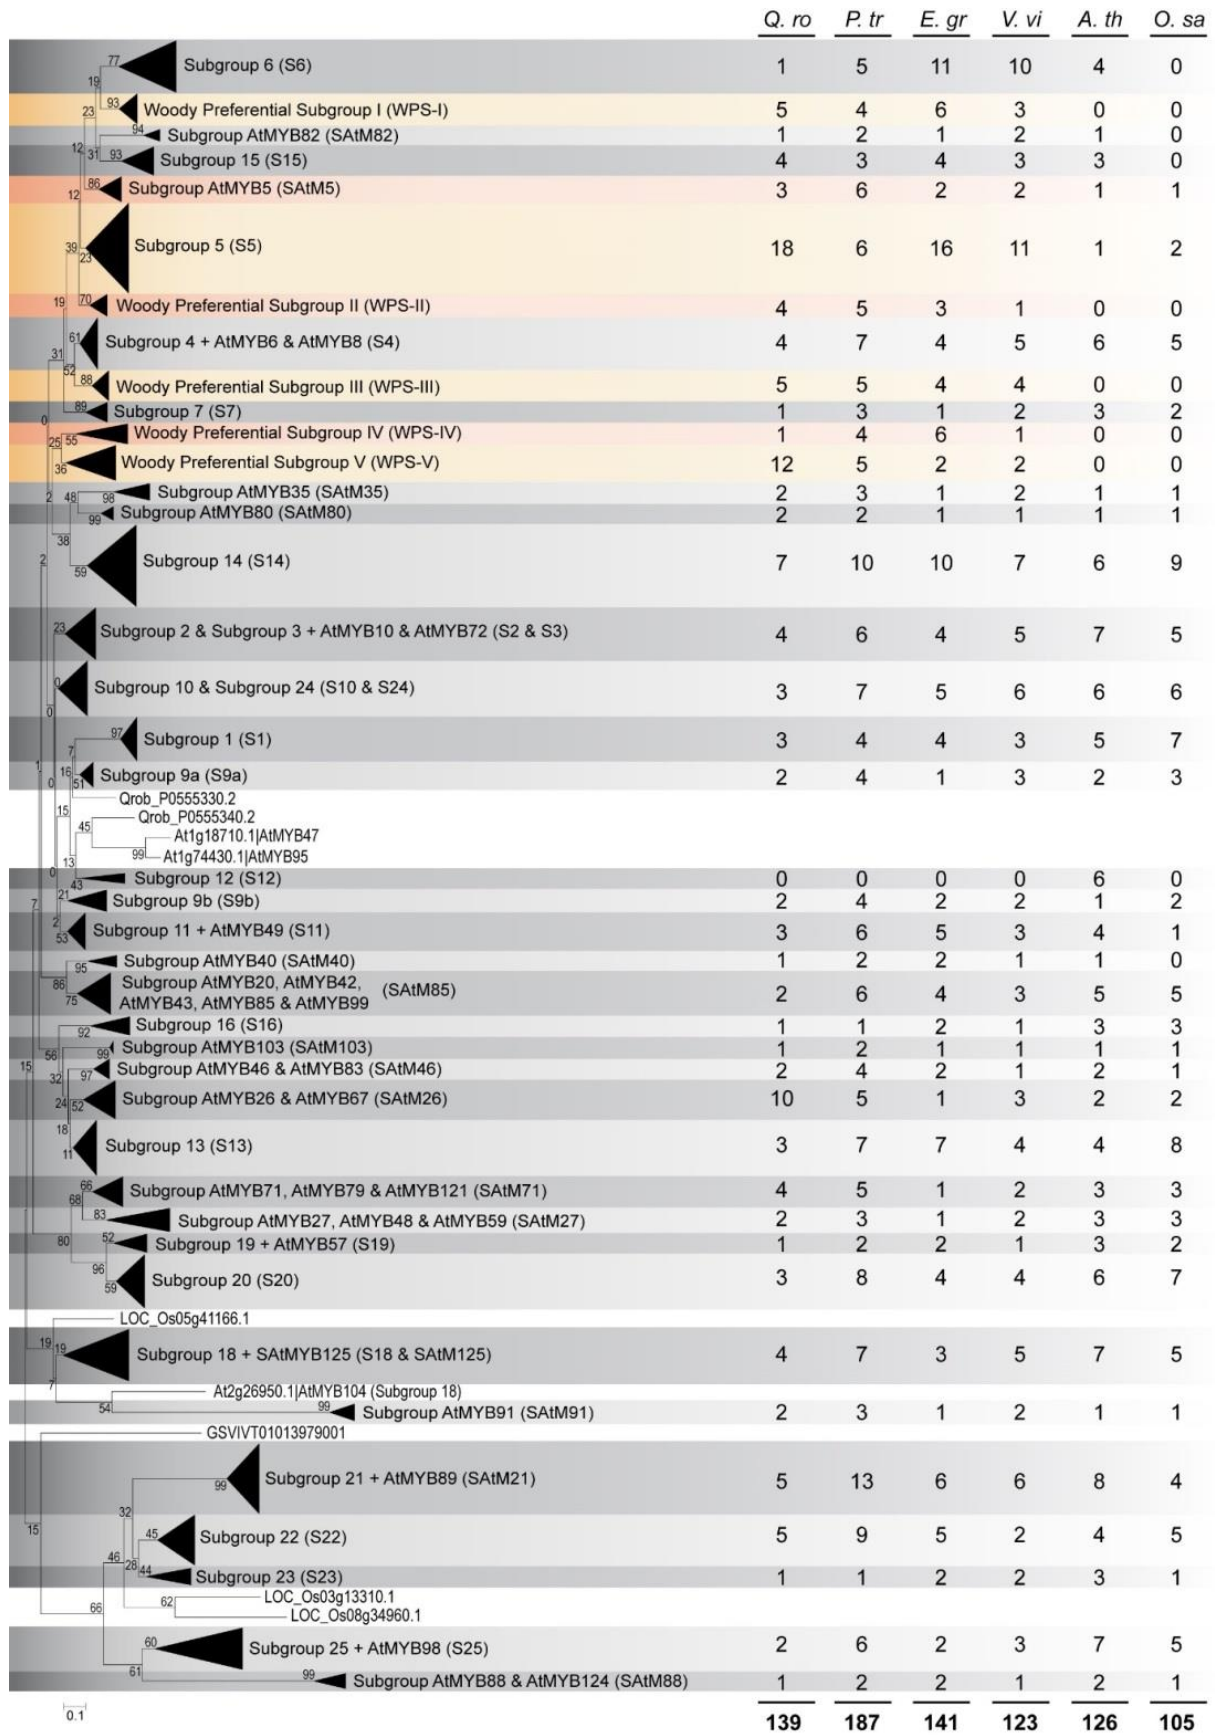

2441

2442

2443 **Supplementary Fig. 46** Classification and percentage of pedunculate oak R2R3-MYB genes  
2444 as a function of their mode of duplication and expansion in woody perennials. R2R3-MYB  
2445 genes were first classified into three categories on the basis of duplication mode (see online  
2446 methods): tandem duplicated genes (TDGs), long distance-duplicated genes (LDGs), and  
2447 singleton genes (SGs). The TDGs and LDGs were further classified into genes belonging or  
2448 not belonging to subgroups expanded in woody perennials.

2449

2450

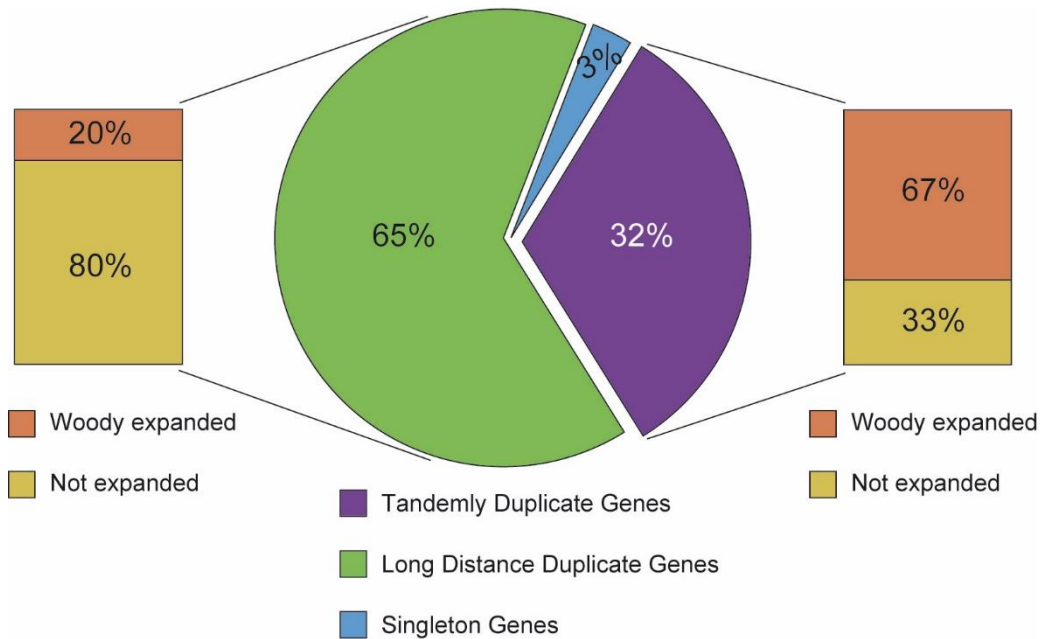

2451

2452

2453

2454

2455



2456 **Supplementary Fig. 47** Phylogenetic analysis of SWEET. Sequences were aligned by  
 2457 ClustalW and a tree was constructed with the neighbor-joining method. The different clades  
 2458 of SWEET genes defined by Chen et al.<sup>71</sup> are color-coded. *Qrob* indicates predicted  
 2459 pedunculate oak (*Quercus robur*) polypeptides, and the reference species are abbreviated as  
 2460 follows: *Arabidopsis thaliana* (At); *Solanum tuberosum* (St); *Eucalyptus grandis* (Eg); *Malus*  
 2461 *domestica* (Md). The tree is rooted on SWEET homologs from *Chlamydomonas reinhardtii*  
 2462 (Cr). The symbols indicate pedunculate oak genes differentially expressed during interactions  
 2463 with the ectomycorrhizal fungi *Piloderma croceum* and *Tuber magnatum*, the ectomycorrhiza  
 2464 helper bacterium *Streptomyces* sp. AcH 505, and the causal agent of oak powdery mildew  
 2465 *Erysiphe alphitoides*. For phylogenetic analysis, protein-coding sequences from *Arabidopsis*  
 2466 *thaliana*, *Solanum tuberosum*, *Eucalyptus grandis*, *Malus domestica* and *Chlamydomonas*  
 2467 *reinhardtii* (non-plant reference) were obtained from the NCBI  
 2468 (<http://www.ncbi.nlm.nih.gov>), and protein-coding sequences from oak were extracted from  
 2469 the haplome. Phylogenetic distances between the SWEET proteins were calculated from a  
 2470 multiple sequence alignment (ClustalW), by the neighbor-joining method (MEGA6), with  
 2471 bootstrapping (1000 replicates).

2472  
 2473

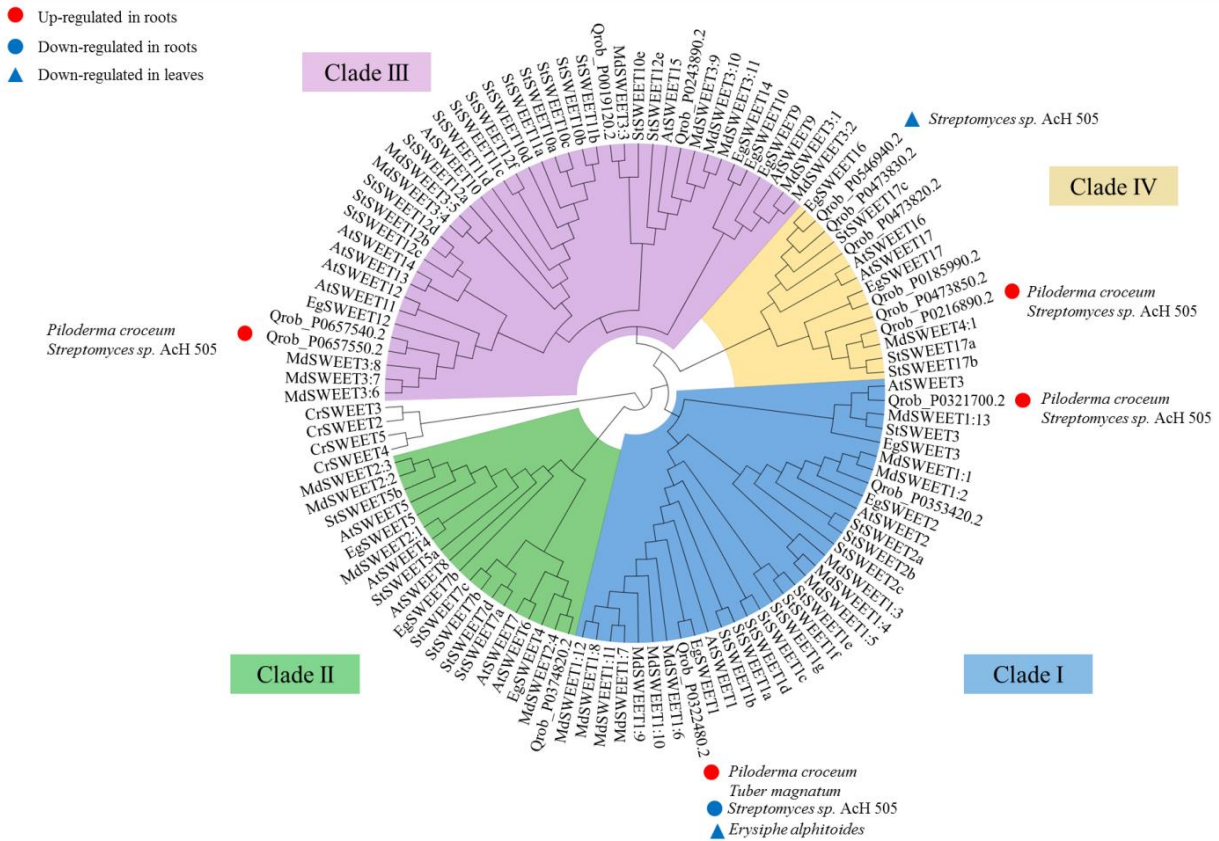

2474  
 2475



2476 **Supplementary Fig. 48** Phylogenetic analysis of GSTUs. Sequences encoding GSTUs from  
 2477 *Quercus robur*, *Populus trichocarpa*, *Arabidopsis thaliana*, *Oryza sativa* and *Sorghum*  
 2478 *bicolor* were retrieved from Phytozome (<https://phytozome.jgi.doe.gov/pz/portal.html>).  
 2479 Sequences were then aligned with Clustal-Omega<sup>175</sup>. The alignment was manually adjusted  
 2480 with SeaView software<sup>107</sup> and curated with GBLOCKS<sup>176</sup>. The unrooted phylogenetic tree was  
 2481 constructed with BioNJ<sup>177</sup> in Seaview and further edited with FigTree software  
 2482 (<http://tree.bio.ed.ac.uk/software/figtree/>). The robustness of the branches was assessed by the  
 2483 bootstrap method with 1000 replications (not shown). Sequences corresponding to *Quercus*  
 2484 *robur*, *Populus trichocarpa*, *Arabidopsis thaliana*, *Oryza sativa* and *Sorghum bicolor* GSTUs  
 2485 are shown in red, blue, green, cyan and pink, respectively. The expanded clusters identified in  
 2486 orthoMCL analysis are highlighted on red branches. Given its considerable divergence, the  
 2487 Qrob\_P0196930.2 protein annotated as GSTU was removed from the analysis.

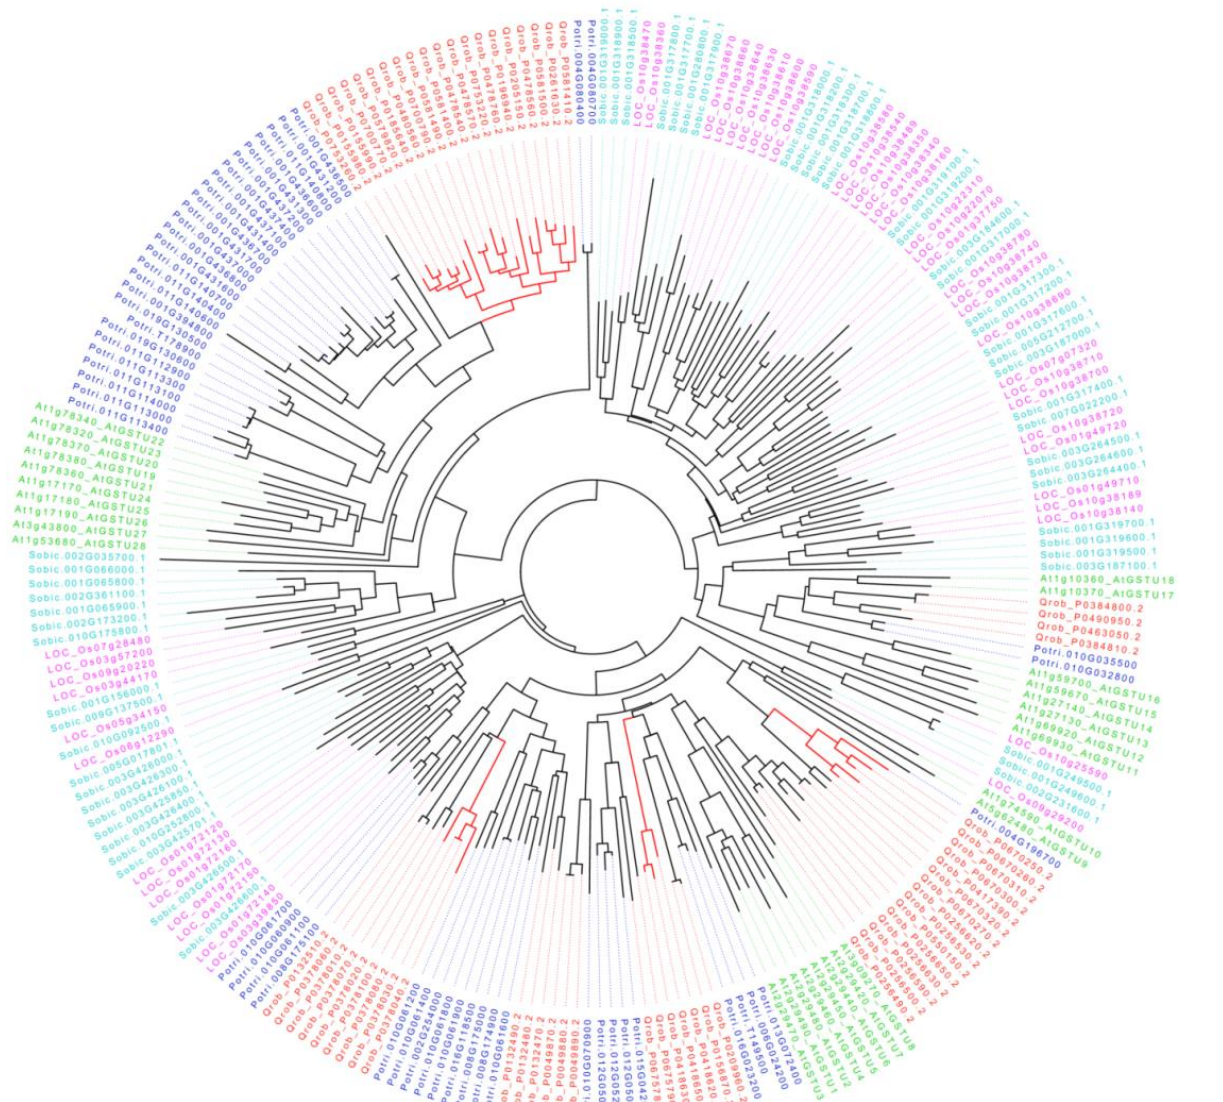

2488

2489 **Supplementary Fig. 49** Phylogenetic analysis of MLO. The proteins used are from *Quercus*  
2490 *robur* (n=19 regular genes and 7 unreliable genes), *Prunus persica* (n=18)<sup>92</sup> and *Arabidopsis*  
2491 *thaliana* (n=7, TAIR - <https://www.arabidopsis.org/>). The analysis was performed on the  
2492 Phylogeny.fr platform<sup>178</sup>, as follows: alignment with MUSCLE (v3.8.31) configured for  
2493 highest accuracy; removal of ambiguous regions (i.e. containing gaps and/or poorly aligned)  
2494 with Gblocks (v0.91b) using the following parameters (minimum length of a block after gap  
2495 cleaning: 10; no gap positions were allowed in the final alignment; all segments with  
2496 contiguous nonconserved positions of more than eight residues were rejected; minimum  
2497 number of sequences for a flanking position: 85%); reconstruction of the phylogenetic tree  
2498 with the maximum likelihood method implemented in PhyML 3.0. The WAG substitution  
2499 model was selected, assuming an estimated proportion of invariant sites of 0.003 and four  
2500 gamma-distributed rate categories to account for rate heterogeneity across sites. The gamma  
2501 shape parameter was estimated directly from the data (gamma=1.340). The reliability of  
2502 internal branches was assessed with the aLRT test (SH-Like). Graphical representation and  
2503 phylogenetic tree generation were achieved with TreeDyn (v198.3). Branch bootstrap support  
2504 values are displayed in blue. Clades were named according to the presence of *Arabidopsis*  
2505 *thaliana* and *Prunus persica* proteins<sup>92</sup>.

2506

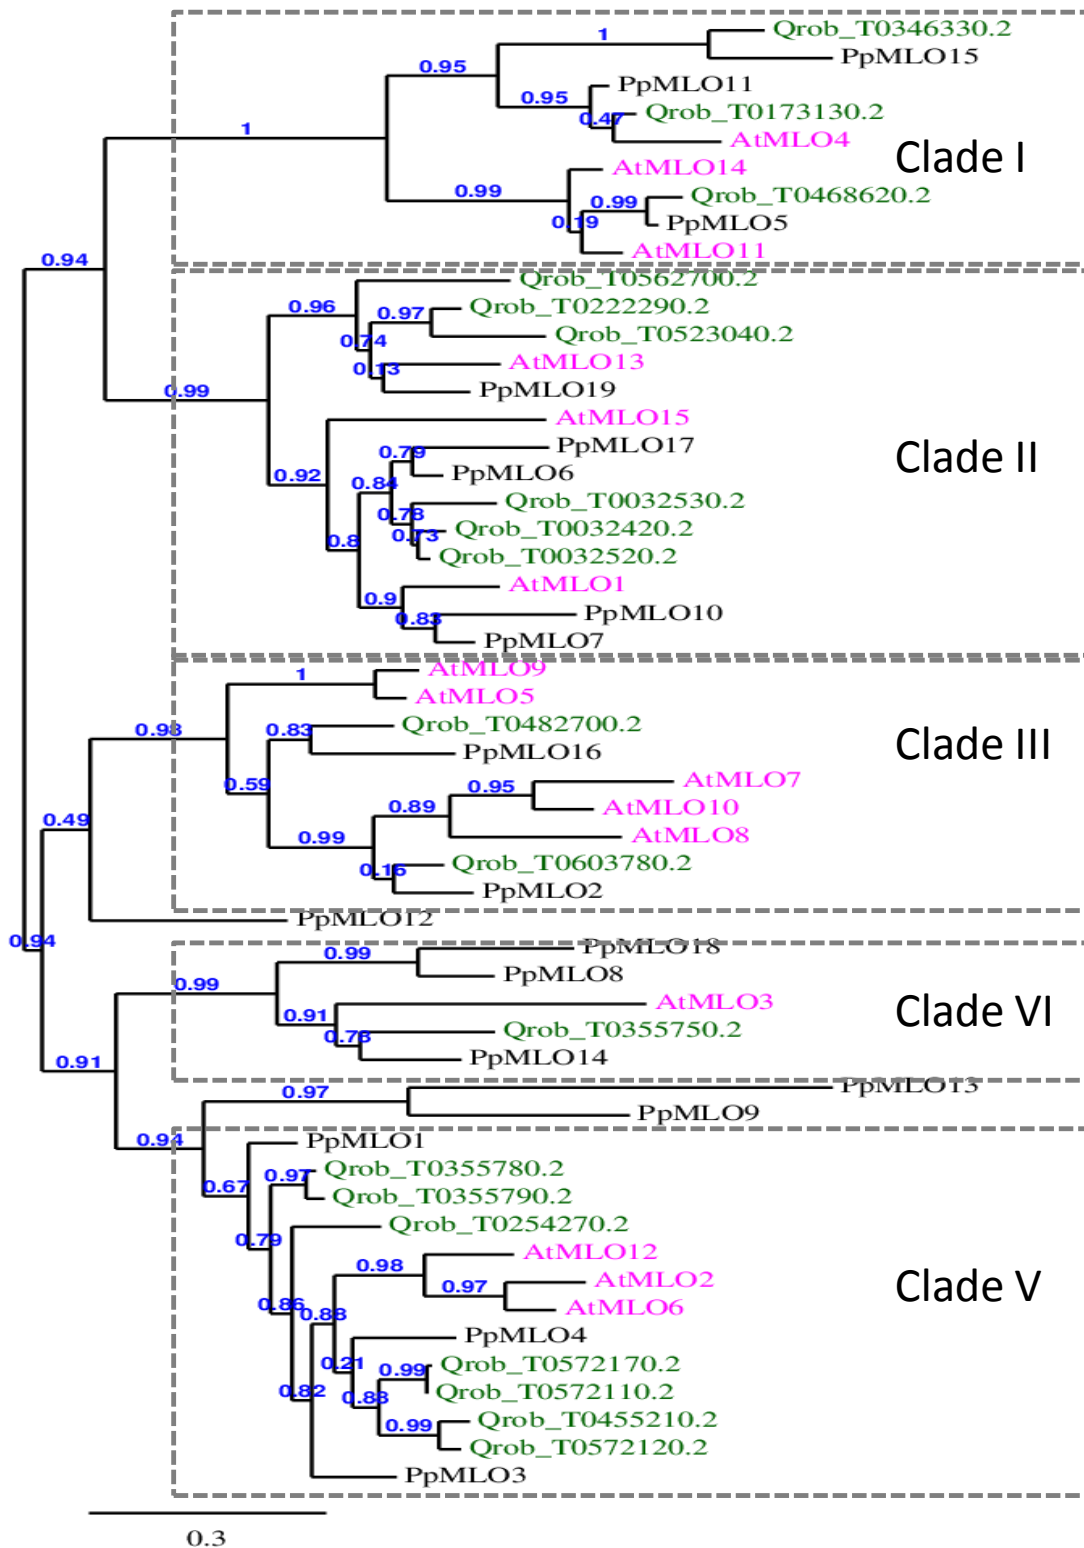

2507

2508

2509 **Supplementary Fig. 50** Biosynthesis of hydrolyzable tannins from gallic acid, via the  $\beta$ -  
2510 glucogallin intermediate.

2511

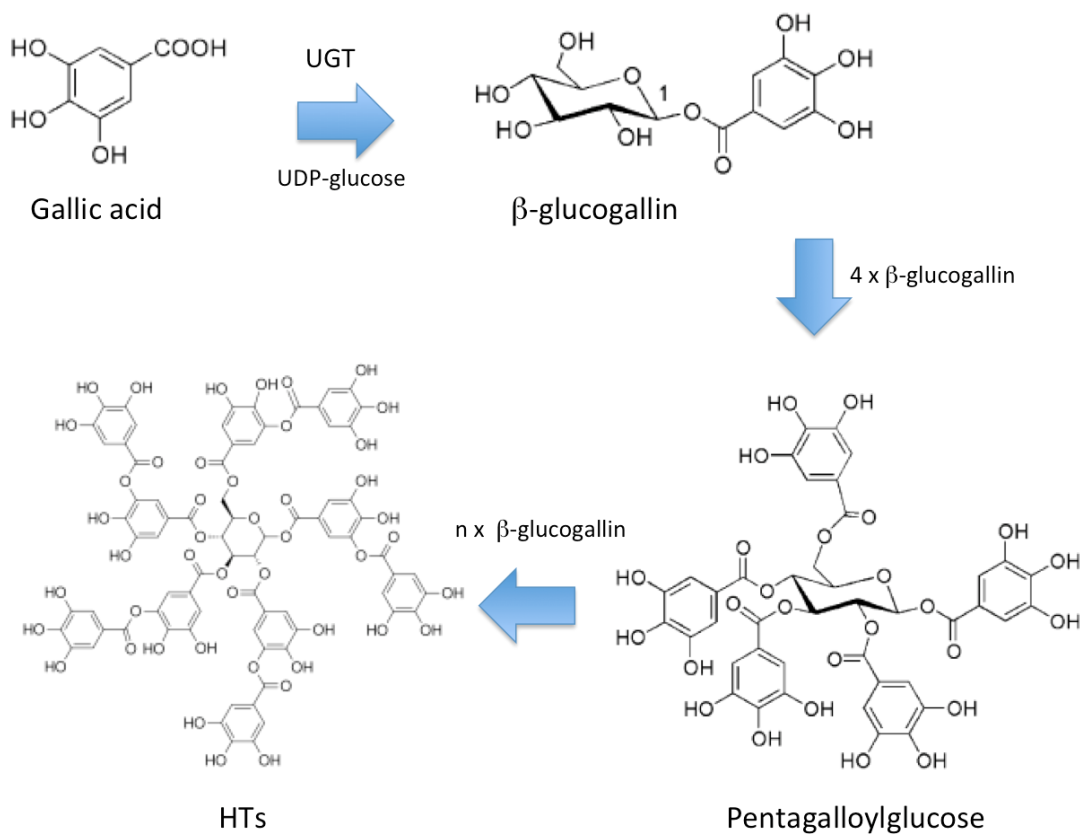

2512

2513

2514 **Supplementary Fig. 51** Phylogeny of oak genes potentially involved in hydrolyzable tannin  
 2515 biosynthesis. **(A)** Phylogeny of annotated oak genes and Arabidopsis genes involved in the  
 2516 chorismate pathway. Genes encoding 3-deoxy-D-arabino-heptulosonate-7-phosphate synthase  
 2517 (DHS), 3-dehydroquinate synthase (DHQS), 3-dehydroquinate dehydratase/shikimate 5-  
 2518 dehydrogenase (DHQ-SDH), shikimate kinase (SK), 5-enolpyruvylshikimate 3-phosphate  
 2519 synthase (EPSPS) and chorismate synthase (CS) are presented. **(B)** Phylogeny of the  
 2520 Arabidopsis members and annotated oak members of the UGT 74, 75, 83 and 84 families.  
 2521 Protein sequences were aligned using ClustalW and the UPGMA tree was drawn based on  
 2522 Jukes-Cantor distances (with Geneious 6.1.8).

2523

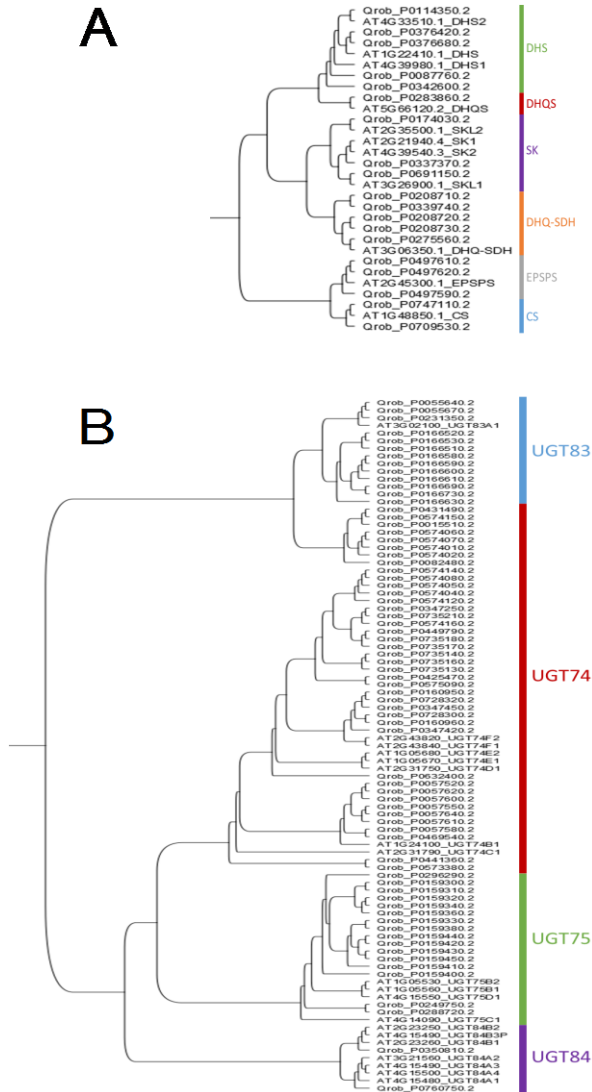

2524

2525

2526



2527 **Supplementary Fig. 52** Comparative phylogenetic analysis of the laccase protein sequences  
 2528 from *Quercus robur*, *Populus trichocarpa*, *Eucalyptus grandis*, *Vitis vinifera*, *Arabidopsis*  
 2529 *thaliana* and *Oriza sativa*. Sequences were aligned with Clustal-Omega<sup>175</sup>. The alignment was  
 2530 manually adjusted with SeaView software<sup>107</sup> and curated with GBlocks<sup>176</sup>. *Arabidopsis*  
 2531 ascorbate oxidases (AO1, AO2, and AO3) were added and used as an outgroup. The  
 2532 phylogenetic tree was calculated with SeaView, using PhyML with the LG model and the  
 2533 aLRT method for branch support, NNI heuristic for optimal tree structure search and BioNJ  
 2534 for optimizing tree topology. The phylogenetic tree was further edited with FigTree software  
 2535 (<http://tree.bio.ed.ac.uk/software/figtree/>).

2536

2537

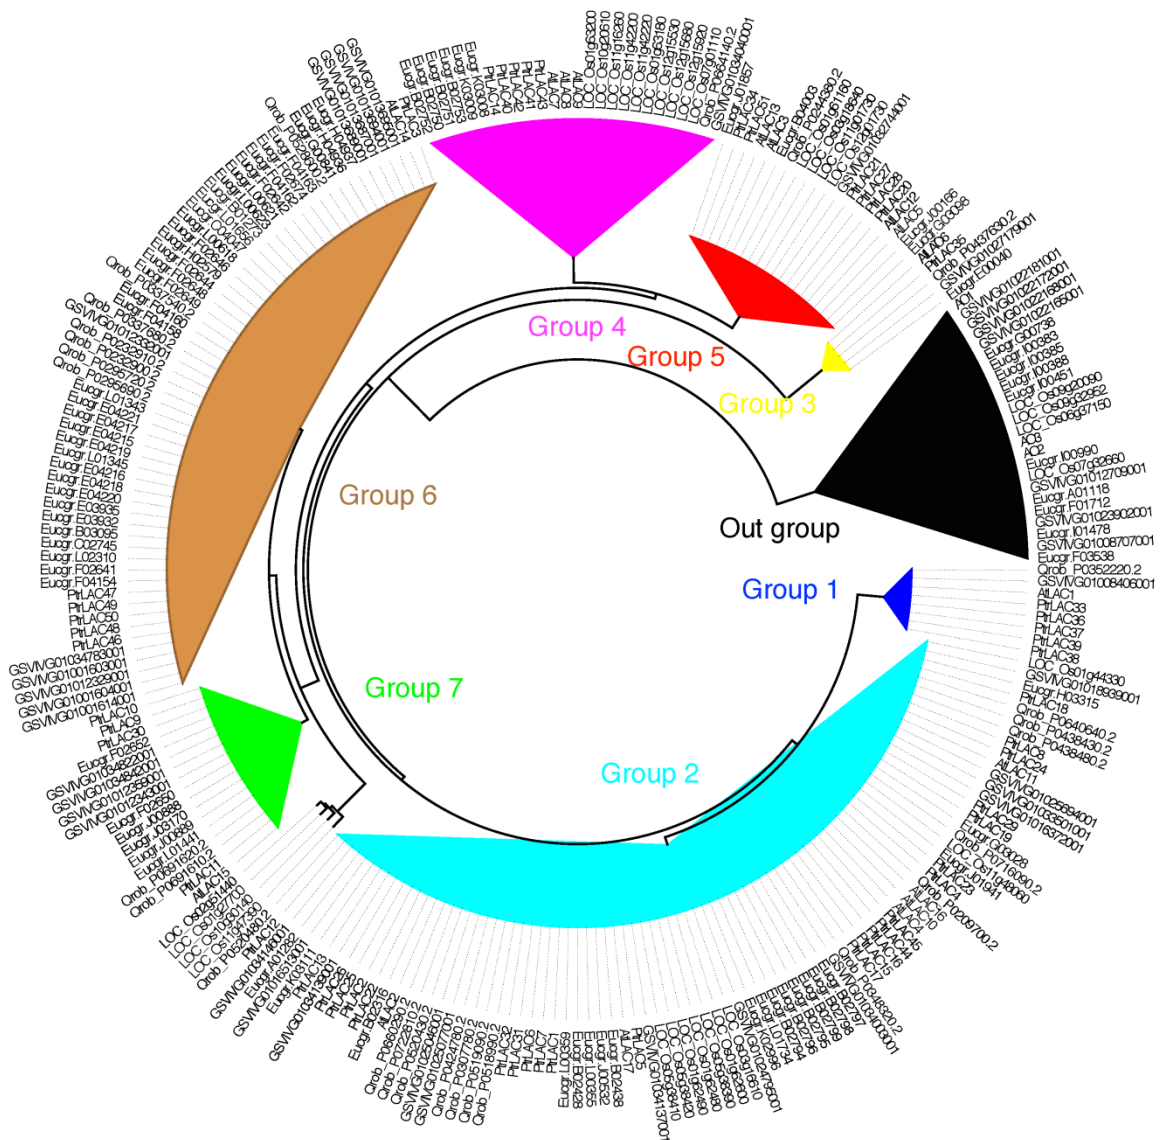

2538

2539

2540 **Supplementary Fig. 53** Example of a pedunculate oak specimen sampled for genetic  
2541 diversity analysis by the pool-seq approach.

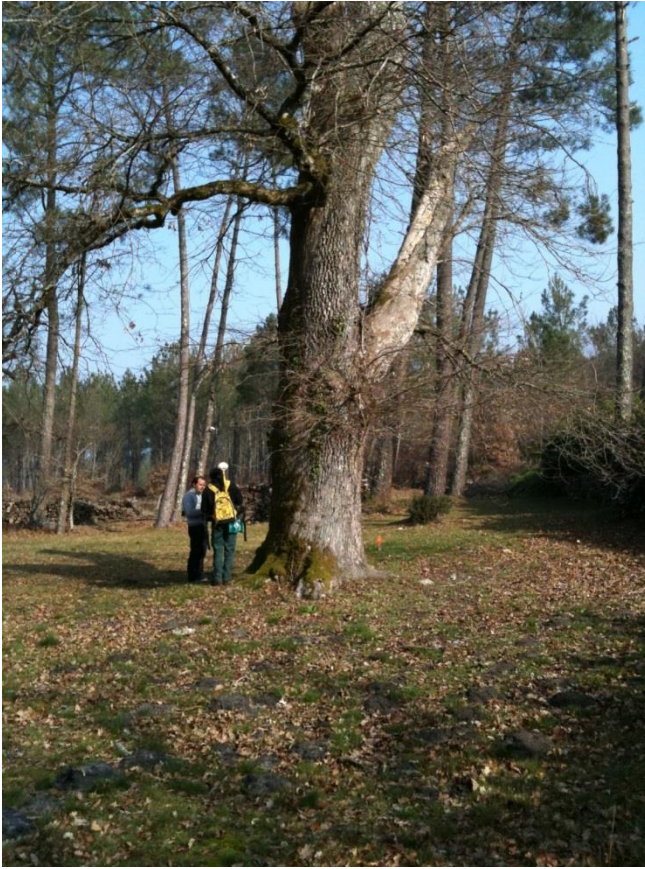

2542

2543 © Christophe Plomion

2544

2545 **Supplementary Fig. 54** Distribution of  $\pi_4$ ,  $\pi_0$  and the  $\pi_0/\pi_4$  ratio for gene families.

2546

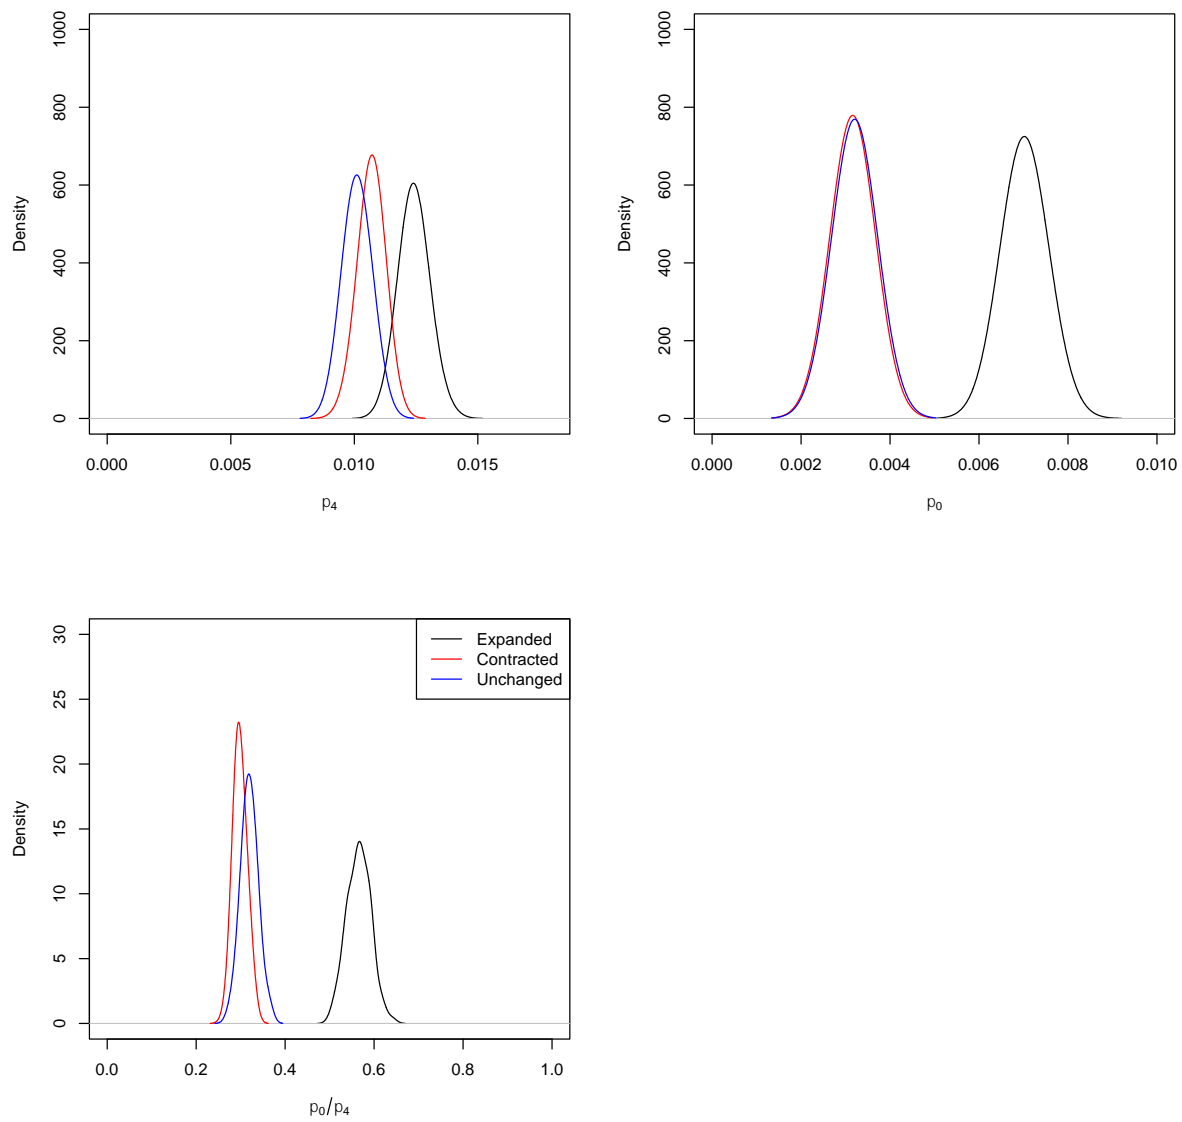

2547

2548



2549 **Supplementary Fig. 55** A phylogenetic tree for eudicots, based on the tree generated by  
 2550 Zanne et al.<sup>138</sup> collapsed to the order level with clade sizes denoted by triangle size. For each  
 2551 order, we show the number of woody and herbaceous species for which whole-genome  
 2552 sequences are already or will soon be available (as reported in  
 2553 [https://genomevolution.org/wiki/index.php/Sequenced\\_plant\\_genomes](https://genomevolution.org/wiki/index.php/Sequenced_plant_genomes) as of 18 December  
 2554 2016). Variable and diverse species, according to Fitzjohn et al.<sup>149</sup>, for which genome  
 2555 sequences are available are highlighted in green.

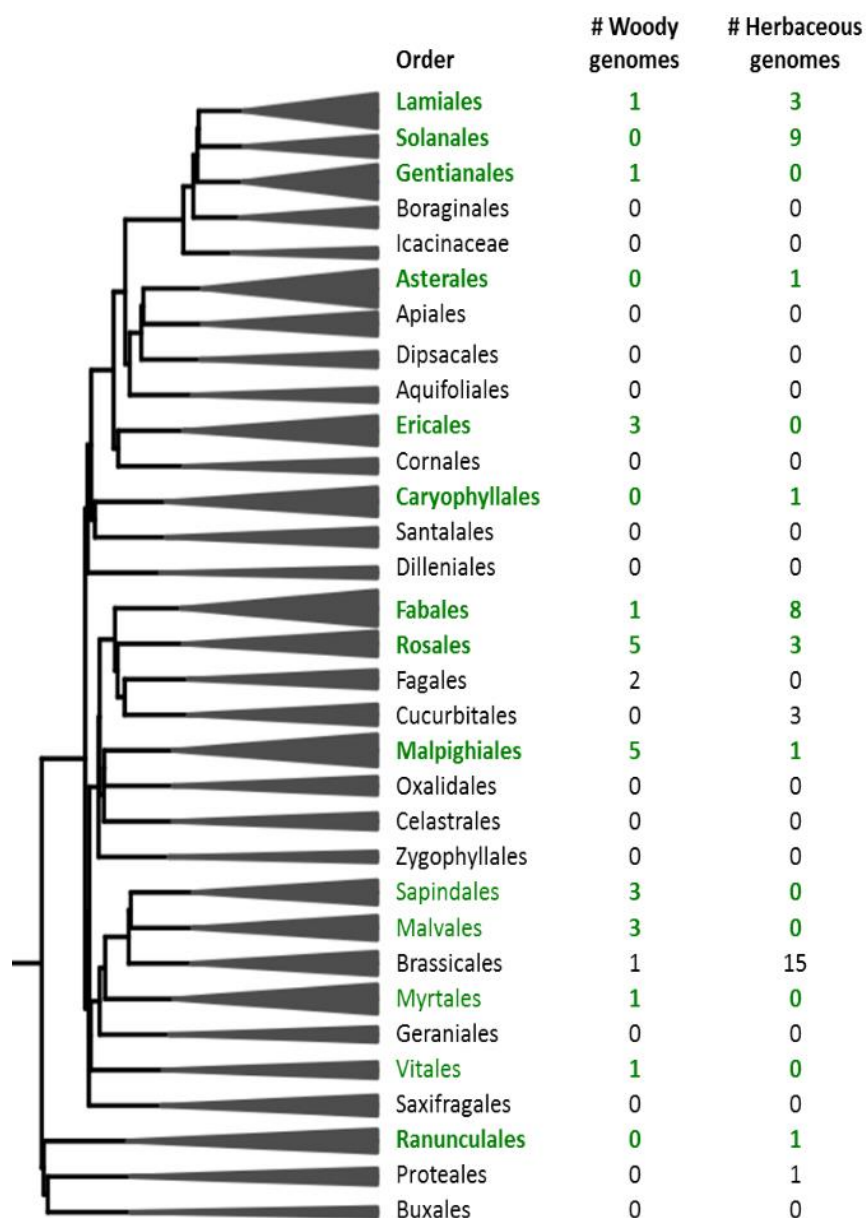

2556

2557

2558 **Supplementary Fig. 56** Number of GO terms per gene for the 16,820 pedunculate oak gene  
2559 models with a GO.

2560

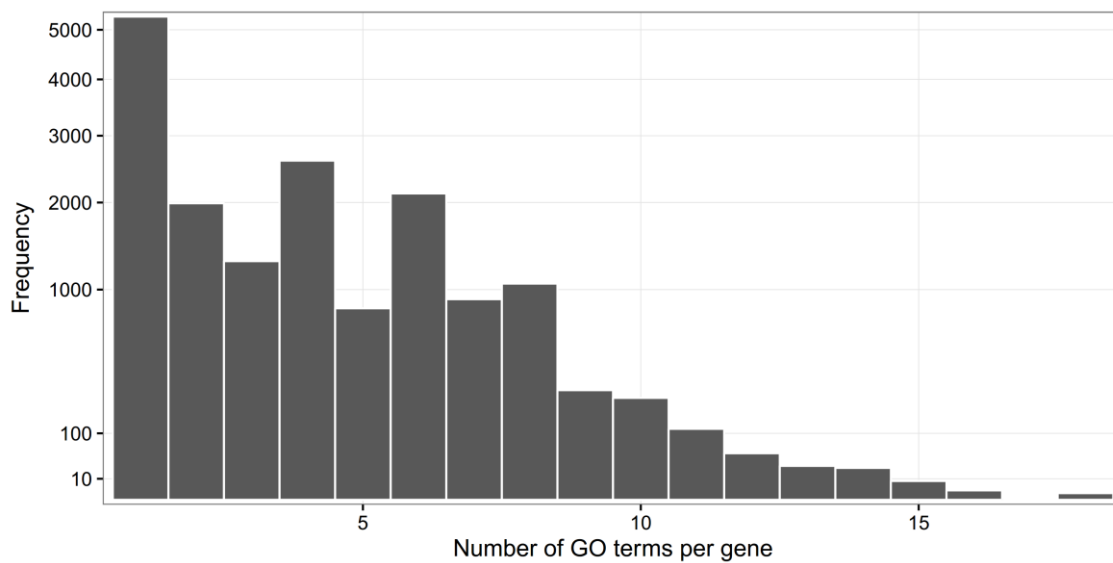

2561

2562

2563 **Supplementary Fig. 57** Number of genes per Gene Ontology (GO) term for the 1,722 unique  
2564 pedunculate oak GO terms.

2565

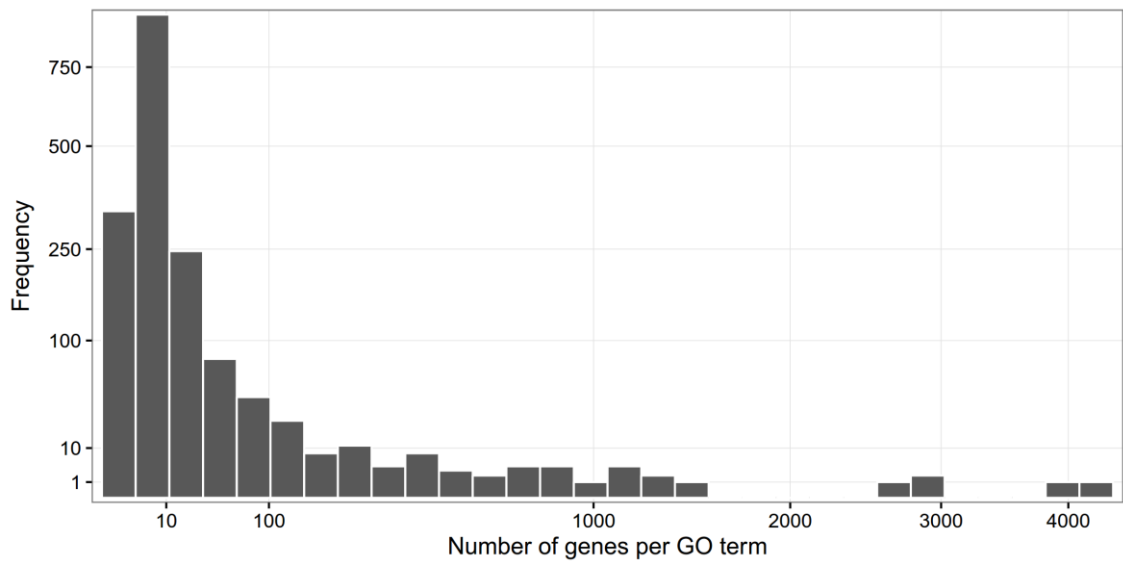

2566

2567

2568 **Supplementary Fig. 58** Number of genes within orthoMCL orthogroups expanded in  
2569 pedunculate oak.

2570

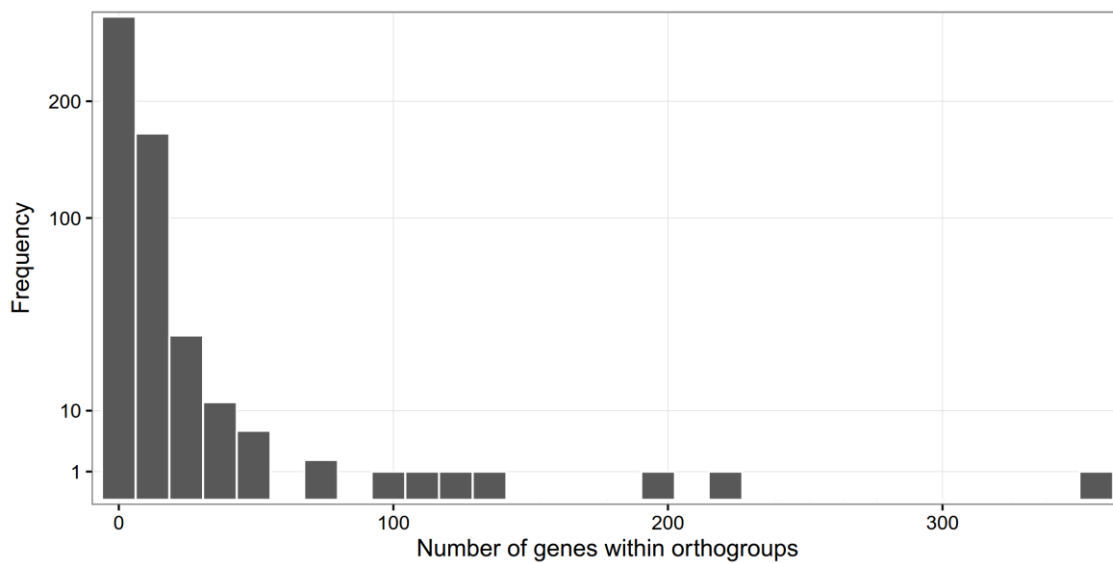

2571

2572

2573 **Supplementary Fig. 59** Number of gene ontology (GO) terms per orthogroup expanded in  
2574 pedunculate oak, for the 1,722 unique GO terms.

2575

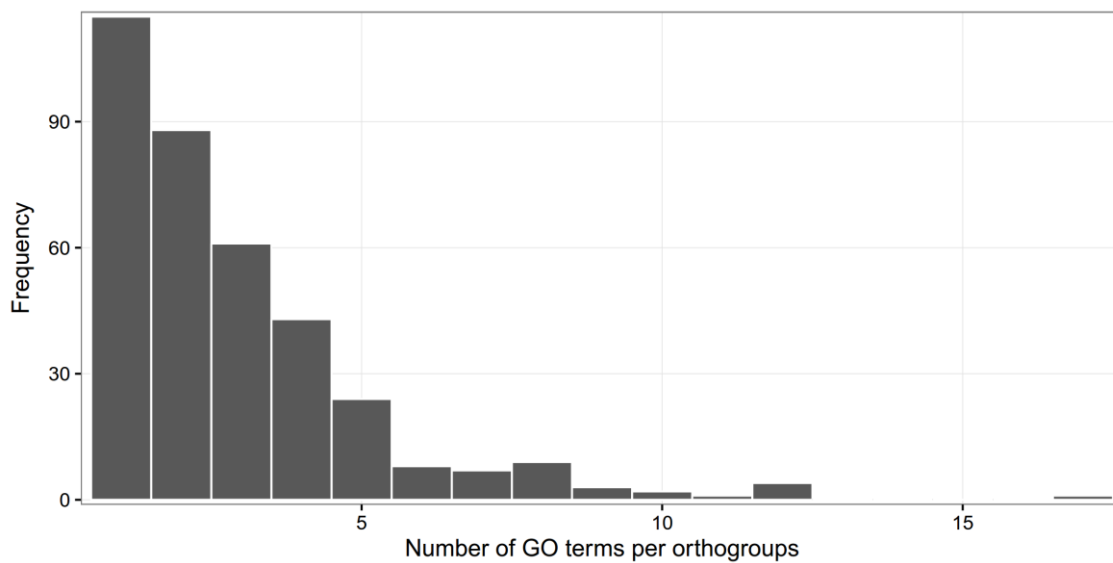

2576

2577

2578 **Supplementary Fig. 60** Fold-enrichment (*x*-axis) of significant gene ontology (GO) terms  
 2579 ( $P < 0.01$ ) of the orthogroups expanded in pedunculate oak relative to the background of the  
 2580 whole genome. GO representing biological processes are shown as red lines, cellular  
 2581 components are shown in blue and molecular functions are shown in green. The vertical  
 2582 dashed line represents the 1.5 threshold from which we considered interesting biologically  
 2583 relevant enrichments. Sample sizes are provided in **Supplementary Data Set 8** sheet #4.

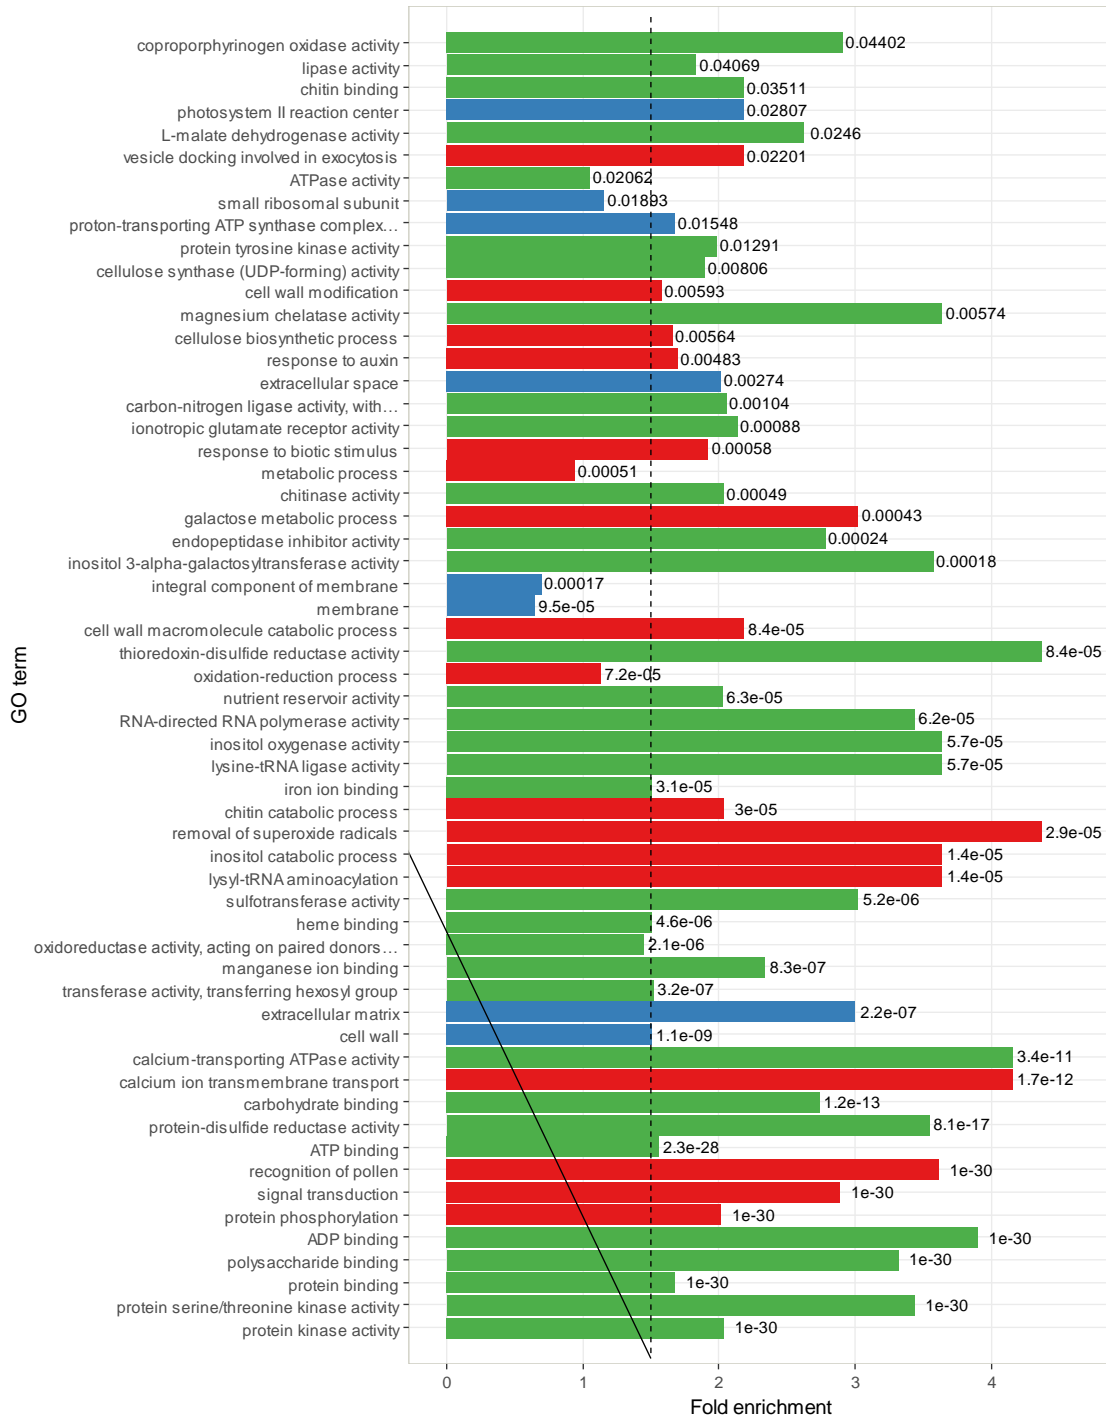

2584

2585
